# Supplementary material for: A diverse gut virome from Drosophila melanogaster
Source: Research Square preprint supplement (doi:10.21203/rs.3.rs-7226538/v1), 2025-09-30
Supplement: Supplementary file 1 [file f49393a56479e10ef79acf09.xlsx]

## Sheet: Table_S1
Table S1: Identified viruses based on VIBRANT, which then their quality checked with checkv
	VIBRANT									Checkv
contig_id	type	Quality	total genes	all KEGG	KEGG v-score	all Pfam	Pfam v-score	all VOG	VOG v-score	length	proviral_length	gene_count	viral_genes	host_genes	checkv_quality	completeness	completeness_method	contamination	warnings
k141_1000083_length_5613_cov_69.0000	lytic	low quality draft	8	3	7.89	3	7.66	5	33.91	5613	NA	8	2	0	Low-quality	3.19	AAI-based (medium-confidence)	0
k141_1000674_length_1413_cov_232.0000	lytic	low quality draft	4	0	0	0	0	1	0.86	1413	NA	4	0	0	Low-quality	2.86	AAI-based (medium-confidence)	0	no viral genes detected
k141_1000718_length_7521_cov_33.0000	lytic	low quality draft	7	0	0	5	9.71	4	14.71	7521	NA	7	4	0	Low-quality	21.09	AAI-based (high-confidence)	0
k141_1000881_length_6453_cov_135.8877	lytic	low quality draft	10	1	4.48	3	15.43	5	34.29	6453	NA	10	7	0	Low-quality	9.99	HMM-based (lower-bound)	0
k141_1001226_length_2684_cov_26.0000	lytic	low quality draft	4	0	0	1	1	4	10.11	2684	NA	4	4	0	Low-quality	3.26	HMM-based (lower-bound)	0
k141_1001376_length_2769_cov_393.0000	lytic	low quality draft	4	0	0	1	1	1	0.3	2769	NA	4	1	0	Low-quality	1.12	HMM-based (lower-bound)	0
k141_1001476_length_2882_cov_307.0000	lytic	low quality draft	5	0	0	1	7.58	1	8.05	2882	NA	5	1	0	Low-quality	1.84	HMM-based (lower-bound)	0
k141_1002104_length_1235_cov_71.0000	lytic	low quality draft	4	0	0	2	0.48	2	2.24	1235	NA	4	2	0	Low-quality	2.86	HMM-based (lower-bound)	0
k141_1002421_length_20828_cov_462.0000	lytic	low quality draft	22	2	0.9	12	10.27	18	47.02	20828	NA	22	19	1	Low-quality	44.46	AAI-based (medium-confidence)	0
k141_1002557_length_3328_cov_300.0000	lytic	low quality draft	4	0	0	1	0.02	1	10	3328	NA	4	1	0	Low-quality	4.08	HMM-based (lower-bound)	0
k141_1002859_length_2446_cov_162.1128	lytic	low quality draft	5	0	0	0	0	3	6.76	2446	NA	5	4	0	Low-quality	4.15	HMM-based (lower-bound)	0
k141_1002887_length_1299_cov_1147.1373	lytic	low quality draft	4	0	0	0	0	1	0.19	1299	NA	3	0	0	Low-quality	0.51	AAI-based (medium-confidence)	0	no viral genes detected
k141_1003613_length_2624_cov_345.8820	lytic	low quality draft	5	0	0	1	0.77	3	8.92	2624	NA	5	3	0	Low-quality	2.86	HMM-based (lower-bound)	0
k141_1003808_length_1364_cov_163.0000	lytic	low quality draft	4	0	0	0	0	1	3.56	1364	NA	4	1	0	Low-quality	0.39	HMM-based (lower-bound)	0
k141_1003919_length_3982_cov_60.0000	lytic	low quality draft	11	0	0	0	0	1	2.21	3982	NA	12	1	0	Low-quality	3.58	HMM-based (lower-bound)	0
k141_1003996_length_1015_cov_12.0000	lytic	low quality draft	5	0	0	1	0.14	2	4.62	1015	NA	5	1	0	Low-quality	1.99	AAI-based (high-confidence)	0
k141_1005105_length_2530_cov_413.6827	lytic	low quality draft	7	0	0	3	0.65	2	4.17	2530	NA	7	2	0	Low-quality	4.83	AAI-based (high-confidence)	0
k141_1005959_length_5631_cov_627.6749	lytic	low quality draft	6	0	0	1	0.01	1	0.13	5631	NA	6	0	0	Not-determined	NA	NA	0	no viral genes detected
k141_1006301_length_3614_cov_61.0000	lytic	low quality draft	4	1	2.79	1	1.61	2	13.96	3614	NA	4	1	0	Low-quality	7.15	HMM-based (lower-bound)	0
k141_1006623_length_15856_cov_309.0000	lytic	low quality draft	17	1	0.05	1	0.05	9	17.01	15856	NA	17	8	0	Low-quality	6.46	AAI-based (medium-confidence)	0
k141_1006882_length_6666_cov_1548.9910	lytic	low quality draft	6	0	0	0	0	2	1.73	6666	NA	6	0	0	Not-determined	NA	NA	0	no viral genes detected
k141_1007402_length_5812_cov_699.9104	lytic	low quality draft	9	0	0	0	0	2	2.39	5812	NA	9	1	0	Low-quality	3.92	HMM-based (lower-bound)	0
k141_1007425_length_1973_cov_997.5142	lytic	low quality draft	5	0	0	0	0	1	4.11	1973	NA	5	1	0	Low-quality	2.28	HMM-based (lower-bound)	0
k141_1007697_length_1546_cov_972.3011	lytic	low quality draft	5	0	0	1	0.19	1	0.71	1546	NA	5	1	0	Low-quality	3.41	HMM-based (lower-bound)	0
k141_1007794_length_5418_cov_318.0000	lytic	low quality draft	7	1	0.01	1	1.83	1	0.52	5418	2979	7	1	1	Low-quality	2.26	HMM-based (lower-bound)	45.02
k141_100781_length_2853_cov_601.0000	lytic	low quality draft	6	0	0	2	2	1	1.98	2853	NA	6	3	0	Low-quality	3.29	HMM-based (lower-bound)	0
k141_1007881_length_3670_cov_136.0000	lytic	low quality draft	5	1	0.85	2	5.01	2	3.63	3670	NA	5	0	1	Not-determined	NA	NA	0	no viral genes detected
k141_1007885_length_4445_cov_1273.0000	lytic	low quality draft	8	2	0.57	1	0.32	2	1.12	4445	NA	8	0	1	Not-determined	NA	NA	0	no viral genes detected
k141_1008350_length_7455_cov_32.0000	lytic	low quality draft	7	1	0.69	1	0	1	10	7455	NA	8	0	0	Not-determined	NA	NA	0	no viral genes detected
k141_1008433_length_22326_cov_53.0000	lytic	low quality draft	27	6	21.19	6	28.39	8	45.75	22326	NA	27	3	0	Low-quality	9.49	AAI-based (medium-confidence)	0
k141_1009233_length_1829_cov_102.0000	lytic	low quality draft	5	0	0	0	0	1	10	1829	NA	5	2	0	Low-quality	2.18	HMM-based (lower-bound)	0
k141_1009523_length_2137_cov_992.0000	lytic	low quality draft	4	0	0	2	7.65	2	20	2137	NA	4	3	0	Low-quality	5.25	AAI-based (high-confidence)	0
k141_1009574_length_10817_cov_125.0948	lytic	low quality draft	14	0	0	2	3.12	1	10	10817	NA	14	2	1	Low-quality	20.35	AAI-based (medium-confidence)	0
k141_1009597_length_2489_cov_42.0000	lytic	low quality draft	7	1	0.06	1	0.04	1	0.18	2489	NA	7	2	0	Low-quality	3.9	HMM-based (lower-bound)	0
k141_1010776_length_2115_cov_280.1297	lytic	low quality draft	7	0	0	0	0	1	1.1	2115	NA	5	1	0	Low-quality	0.85	HMM-based (lower-bound)	0
k141_1011010_length_4589_cov_162.9798	lytic	low quality draft	5	0	0	1	0.91	3	5.13	4589	NA	5	1	0	Low-quality	3.1	HMM-based (lower-bound)	0
k141_1011015_length_8471_cov_304.4156	lytic	low quality draft	6	2	4.37	3	4.43	4	22.46	8471	NA	6	0	0	Not-determined	NA	NA	0	no viral genes detected
k141_1011054_length_2245_cov_302.0000	lytic	low quality draft	5	0	0	0	0	1	0.86	2245	NA	5	0	0	Not-determined	NA	NA	0	no viral genes detected
k141_10115_length_8254_cov_59416.9244	lytic	low quality draft	7	2	4.46	2	5.43	2	10.04	8254	NA	6	2	0	Low-quality	5.42	AAI-based (high-confidence)	0
k141_1011946_length_2892_cov_801.0000	lytic	low quality draft	6	2	2.64	1	3.08	2	2.05	2892	NA	6	2	0	Low-quality	2.89	HMM-based (lower-bound)	0
k141_1012312_length_1353_cov_7.0000	lytic	low quality draft	4	1	2.89	1	1.95	2	16.82	1353	NA	4	2	0	Low-quality	0.85	HMM-based (lower-bound)	0
k141_1012524_length_2572_cov_20.3826	lytic	low quality draft	7	0	0	0	0	1	0.06	2572	NA	7	0	0	Low-quality	5.93	AAI-based (medium-confidence)	0	no viral genes detected
k141_1012862_length_2280_cov_270.1879	lytic	low quality draft	4	0	0	1	0.18	1	0.95	2280	NA	4	0	1	Low-quality	5.04	AAI-based (medium-confidence)	0	no viral genes detected
k141_1013016_length_2923_cov_105.0000	lytic	low quality draft	5	0	0	0	0	2	15.99	2923	NA	5	2	0	Low-quality	2.24	HMM-based (lower-bound)	0
k141_1013185_length_15078_cov_404.9130	lytic	medium quality draft	33	0	0	5	4.96	9	7.26	15078	NA	29	2	0	Low-quality	23.92	HMM-based (lower-bound)	0	low-confidence ITR
k141_1013196_length_3804_cov_1308.0000	lytic	low quality draft	5	0	0	1	1	2	3.44	3804	NA	5	1	0	Low-quality	10.18	AAI-based (medium-confidence)	0
k141_1013435_length_2565_cov_43.0000	lytic	low quality draft	5	0	0	1	0.93	3	16.86	2565	NA	5	2	0	Low-quality	4.19	HMM-based (lower-bound)	0
k141_101352_length_4336_cov_148.0000	lytic	low quality draft	5	1	2.79	2	2.7	4	25.57	4336	NA	5	4	0	Low-quality	9.22	AAI-based (high-confidence)	0
k141_1013646_length_6696_cov_503.5515	lytic	low quality draft	6	1	0.39	1	3.08	1	1.6	6696	NA	6	1	0	Low-quality	3.6	HMM-based (lower-bound)	0
k141_1013755_length_3559_cov_81.0041	lysogenic	low quality draft	6	2	7.85	2	1.73	2	12.49	3559	NA	6	0	0	Not-determined	NA	NA	0	no viral genes detected
k141_1013800_length_4490_cov_135.0000	lytic	low quality draft	5	0	0	1	1.92	3	11.25	4490	2843	5	2	1	Low-quality	0.76	AAI-based (high-confidence)	36.68
k141_1014565_length_1231_cov_367.0000	lytic	low quality draft	4	0	0	1	1	2	3.38	1231	NA	4	2	0	Low-quality	2.32	AAI-based (medium-confidence)	0
k141_101492_length_1463_cov_392.0000	lytic	low quality draft	4	0	0	0	0	2	2.27	1463	NA	4	2	0	Low-quality	3	HMM-based (lower-bound)	0
k141_1014970_length_1530_cov_426.0000	lytic	low quality draft	5	0	0	0	0	1	0.12	1530	NA	5	1	0	Low-quality	2.83	AAI-based (medium-confidence)	0
k141_1015215_length_3056_cov_212.0000	lytic	low quality draft	7	1	0.69	0	0	1	4.53	3056	NA	8	0	0	Not-determined	NA	NA	0	no viral genes detected
k141_1015848_length_28626_cov_135.0918	lytic	medium quality draft	32	3	1.66	3	2.52	9	42.77	28626	NA	32	6	0	Low-quality	13.27	HMM-based (lower-bound)	0
k141_1015894_length_4210_cov_2366.0000	lytic	low quality draft	6	1	0.04	2	1.33	3	10.24	4210	NA	6	3	0	Low-quality	9.5	AAI-based (medium-confidence)	0
k141_1016289_length_4647_cov_382.9956	lytic	low quality draft	11	2	0.32	1	0.02	2	12.95	4647	NA	11	0	1	Not-determined	NA	NA	0	no viral genes detected
k141_1016987_length_1290_cov_3058.0000	lytic	low quality draft	4	0	0	1	0.15	1	1.36	1290	NA	4	2	0	Low-quality	2.26	HMM-based (lower-bound)	0
k141_1017549_length_3581_cov_1207.9924	lytic	low quality draft	5	0	0	0	0	1	0.86	3581	NA	5	0	0	Not-determined	NA	NA	0	no viral genes detected
k141_1018777_length_1387_cov_6.0000	lytic	low quality draft	4	0	0	1	0.19	1	0.71	1387	NA	4	1	0	Low-quality	3.61	AAI-based (high-confidence)	0
k141_1019057_length_7629_cov_163.0000	lytic	low quality draft	11	2	6.89	3	12.93	4	40	7629	NA	12	5	0	Low-quality	7.86	HMM-based (lower-bound)	0
k141_1019440_length_3823_cov_585.0000	lytic	low quality draft	10	1	0.05	0	0	4	0.45	3823	NA	10	0	0	Not-determined	NA	NA	0	no viral genes detected
k141_1019529_length_7564_cov_405.3819	lytic	low quality draft	12	2	5.5	4	4.18	7	33.65	7564	NA	12	6	0	Low-quality	16.81	AAI-based (high-confidence)	0
k141_1020269_length_14931_cov_447.0000	lytic	low quality draft	19	0	0	1	2.71	8	5.93	14931	NA	19	9	0	Low-quality	34.38	AAI-based (medium-confidence)	0
k141_1020315_length_4323_cov_472.0000	lytic	low quality draft	6	1	3.5	1	3.75	1	0.36	4323	NA	6	0	0	Low-quality	4.48	AAI-based (high-confidence)	0	no viral genes detected
k141_1020320_length_1154_cov_245.0000	lytic	low quality draft	4	0	0	0	0	1	0.7	1154	NA	4	1	0	Low-quality	0.91	AAI-based (medium-confidence)	0
k141_1020709_length_2756_cov_26.0000	lytic	low quality draft	6	0	0	2	2	2	7.66	2756	NA	6	1	0	Low-quality	7.43	AAI-based (medium-confidence)	0
k141_1020726_length_2382_cov_334.0000	lytic	low quality draft	5	0	0	2	3.53	2	13.79	2382	NA	5	2	0	Low-quality	4.73	AAI-based (medium-confidence)	0
k141_1021014_length_2087_cov_53.0000	lytic	low quality draft	5	2	1.08	1	0.18	3	6.95	2087	NA	5	1	0	Low-quality	1.3	HMM-based (lower-bound)	0
k141_1021042_length_4513_cov_193.1093	lytic	low quality draft	4	0	0	0	0	1	0.01	4513	NA	4	0	0	Not-determined	NA	NA	0	no viral genes detected
k141_1021498_length_2206_cov_1198.0000	lytic	low quality draft	7	0	0	0	0	1	10	2206	NA	7	1	0	Low-quality	1.22	HMM-based (lower-bound)	0
k141_1021699_length_2017_cov_190.0000	lytic	low quality draft	4	0	0	0	0	1	9.94	2017	NA	4	1	0	Low-quality	0.82	HMM-based (lower-bound)	0
k141_1021754_length_3686_cov_25.0000	lytic	low quality draft	8	0	0	2	1.99	2	10.15	3686	NA	7	1	0	Low-quality	1.5	HMM-based (lower-bound)	0
k141_1022668_length_1882_cov_846.0557	lytic	low quality draft	4	0	0	1	1.25	3	9.84	1882	NA	4	3	0	Low-quality	3.3	HMM-based (lower-bound)	0
k141_1023393_length_2820_cov_1344.0000	lytic	low quality draft	4	0	0	1	1.25	4	11.24	2820	NA	4	4	0	Low-quality	6.85	AAI-based (high-confidence)	0
k141_1023781_length_1551_cov_594.0000	lytic	low quality draft	5	1	0.95	1	0.42	2	1.2	1551	NA	5	0	0	Not-determined	NA	NA	0	no viral genes detected
k141_1024003_length_2730_cov_1424.7184	lytic	low quality draft	4	0	0	0	0	3	6.76	2730	NA	5	3	0	Low-quality	4.89	HMM-based (lower-bound)	0
k141_1024358_length_29243_cov_44.0000	lytic	low quality draft	36	3	6.28	3	6.09	9	41.72	29243	NA	35	2	0	Low-quality	10.04	HMM-based (lower-bound)	0
k141_1024436_length_17888_cov_154.0000_fragment_1	lysogenic	low quality draft	12	4	24.52	3	26.72	4	36.23	8534	NA	11	1	0	Low-quality	2.56	HMM-based (lower-bound)	0
k141_1024817_length_2729_cov_756.2859	lytic	low quality draft	6	2	3.36	2	4.74	2	16.89	2729	NA	6	3	0	Low-quality	2.83	HMM-based (lower-bound)	0
k141_1025288_length_1248_cov_11.0000	lytic	low quality draft	4	0	0	0	0	1	10	1248	NA	4	0	0	Low-quality	2.74	AAI-based (medium-confidence)	0	no viral genes detected
k141_1025318_length_1449_cov_1011.0000	lytic	low quality draft	4	0	0	1	0.22	1	0.08	1449	NA	5	2	0	Low-quality	1.22	HMM-based (lower-bound)	0
k141_1025843_length_2894_cov_1225.0000	lytic	low quality draft	4	0	0	2	3.97	2	20	2894	NA	4	3	0	Low-quality	5.81	AAI-based (medium-confidence)	0
k141_1025895_length_4672_cov_755.6802	lytic	low quality draft	9	0	0	1	1.9	1	0.4	4672	NA	9	0	0	Not-determined	NA	NA	0	no viral genes detected
k141_1026171_length_1534_cov_403.5851	lytic	low quality draft	4	0	0	0	0	1	9.01	1534	NA	4	1	0	Low-quality	1.23	HMM-based (lower-bound)	0
k141_1026504_length_1528_cov_13.0000	lytic	low quality draft	4	0	0	1	0.35	1	4.29	1528	NA	4	0	0	Low-quality	3.18	AAI-based (medium-confidence)	0	no viral genes detected
k141_1026889_length_3976_cov_521.0000	lytic	low quality draft	9	1	2.25	1	2.71	3	3.08	3976	NA	9	3	0	Low-quality	4.93	HMM-based (lower-bound)	0
k141_1026926_length_114582_cov_1137.1795_fragment_1	lysogenic	medium quality draft	51	8	11.22	16	30.93	35	88.97	41213	35356	51	33	3	Medium-quality	87.83	AAI-based (high-confidence)	14.21
k141_1027746_length_13664_cov_437.0815	lytic	low quality draft	12	0	0	0	0	11	10.3	13664	NA	12	11	0	Low-quality	5.59	AAI-based (medium-confidence)	0
k141_102780_length_3457_cov_109.0000	lytic	low quality draft	5	0	0	0	0	2	3.32	3457	NA	5	2	0	Low-quality	2.21	HMM-based (lower-bound)	0
k141_1027935_length_2266_cov_964.0000	lytic	low quality draft	6	0	0	0	0	1	1.1	2266	NA	6	1	0	Low-quality	3.22	HMM-based (lower-bound)	0
k141_1028047_length_9784_cov_205.3321	lytic	low quality draft	9	1	5.15	0	0	2	2.18	9784	NA	9	2	0	Low-quality	3.38	HMM-based (lower-bound)	0
k141_102839_length_8667_cov_704.4156	lytic	low quality draft	13	6	7.34	5	7.87	9	44.15	8667	NA	13	4	1	Low-quality	2.33	AAI-based (medium-confidence)	0
k141_1028478_length_4212_cov_622.0000	lytic	low quality draft	8	1	1.03	2	1.19	4	0.84	4212	NA	8	1	0	Low-quality	1.11	HMM-based (lower-bound)	0
k141_1028565_length_2756_cov_21.0000	lytic	low quality draft	6	0	0	0	0	1	1.09	2756	NA	6	0	0	Not-determined	NA	NA	0	no viral genes detected
k141_1029243_length_2985_cov_25.0000	lytic	low quality draft	6	0	0	2	1.86	3	17.95	2985	NA	6	4	0	Low-quality	7.08	AAI-based (high-confidence)	0
k141_103010_length_6411_cov_1221.6062	lytic	low quality draft	4	0	0	0	0	1	0.58	6411	NA	3	0	0	Not-determined	NA	NA	0	no viral genes detected
k141_103043_length_26541_cov_285.0069	lytic	low quality draft	26	2	0.38	2	0.37	17	19.39	26541	NA	26	16	0	Low-quality	10.83	AAI-based (medium-confidence)	0
k141_1030445_length_2163_cov_1016.0000	lytic	low quality draft	4	0	0	1	1.25	2	9.62	2163	NA	4	4	0	Low-quality	3.83	HMM-based (lower-bound)	0
k141_1030590_length_2018_cov_1091.8370	lytic	low quality draft	6	0	0	1	0.18	2	5.45	2018	NA	6	2	0	Low-quality	4.33	AAI-based (medium-confidence)	0
k141_1030666_length_4355_cov_601.1894	lytic	low quality draft	7	0	0	1	1.25	6	19.72	4355	NA	7	6	0	Low-quality	12.77	AAI-based (high-confidence)	0
k141_1031091_length_2651_cov_561.2562	lytic	low quality draft	8	2	7.13	2	6.78	2	20	2651	NA	8	0	0	Low-quality	2.78	AAI-based (medium-confidence)	0	no viral genes detected
k141_1031528_length_2225_cov_508.0000	lytic	low quality draft	7	1	3.81	3	8.03	4	24.49	2225	NA	7	4	0	Low-quality	4.43	AAI-based (high-confidence)	0
k141_1031790_length_1363_cov_151.0000	lytic	low quality draft	4	0	0	1	0.19	1	0.71	1363	NA	4	1	0	Low-quality	3.56	AAI-based (medium-confidence)	0
k141_1031791_length_1891_cov_336.0000	lytic	low quality draft	5	0	0	2	1.37	3	9.38	1891	NA	5	3	0	Low-quality	4.41	AAI-based (medium-confidence)	0
k141_1032341_length_9249_cov_490.0000	lysogenic	low quality draft	13	2	7.37	2	12.18	4	22.35	9249	NA	13	5	0	Low-quality	17.91	AAI-based (high-confidence)	0
k141_1032366_length_4283_cov_181.0000	lysogenic	low quality draft	7	2	7.01	4	12.01	5	21.16	4283	3462	7	2	1	Low-quality	6.41	AAI-based (high-confidence)	19.17
k141_1032718_length_4087_cov_144.0000	lytic	low quality draft	6	2	7.51	1	4.63	3	21.49	4087	NA	6	2	0	Low-quality	2.12	HMM-based (lower-bound)	0
k141_1033042_length_2746_cov_1442.8019	lytic	low quality draft	8	1	2.08	1	5.99	1	10	2746	NA	8	0	0	Not-determined	NA	NA	0	no viral genes detected
k141_103315_length_4255_cov_1118.9844	lytic	low quality draft	6	2	0.41	1	5.99	2	10.08	4255	NA	6	0	0	Not-determined	NA	NA	0	no viral genes detected
k141_1033585_length_1513_cov_1567.0000	lytic	low quality draft	4	0	0	0	0	1	9.01	1513	NA	4	2	0	Low-quality	3.27	AAI-based (medium-confidence)	0
k141_1033722_length_2705_cov_66.0000	lytic	low quality draft	6	0	0	0	0	1	2.17	2705	NA	6	1	0	Low-quality	1.23	HMM-based (lower-bound)	0
k141_1033973_length_2486_cov_492.0000	lytic	low quality draft	5	0	0	1	0.18	1	0.95	2486	NA	5	1	1	Low-quality	4.23	HMM-based (lower-bound)	0
k141_1033985_length_10439_cov_201.1764	lytic	low quality draft	13	0	0	4	4.38	4	12.49	10439	NA	13	4	0	Low-quality	22.06	AAI-based (medium-confidence)	0
k141_1034141_length_4470_cov_633.0000	lytic	low quality draft	12	0	0	3	3	5	3.78	4470	NA	12	1	0	Low-quality	4.02	HMM-based (lower-bound)	0
k141_1035371_length_3787_cov_465.9978	lytic	low quality draft	4	0	0	0	0	1	0.86	3787	NA	5	0	0	Not-determined	NA	NA	0	no viral genes detected
k141_1035652_length_1986_cov_235.0000	lytic	low quality draft	4	0	0	1	0.89	2	10.28	1986	NA	4	2	0	Low-quality	3.95	AAI-based (high-confidence)	0
k141_1035956_length_2450_cov_1147.9151	lytic	low quality draft	4	1	0.96	0	0	2	6.87	2450	NA	4	1	0	Low-quality	1.32	AAI-based (medium-confidence)	0
k141_1036180_length_2958_cov_21.0000	lytic	low quality draft	7	0	0	1	0.11	2	10.86	2958	NA	7	5	0	Low-quality	7.95	AAI-based (high-confidence)	0
k141_1036569_length_3034_cov_280.1424	lytic	low quality draft	8	0	0	0	0	2	0.98	3034	NA	8	0	0	Low-quality	5.99	AAI-based (medium-confidence)	0	no viral genes detected
k141_1037215_length_1662_cov_691.0000	lytic	low quality draft	5	0	0	1	1	1	6.8	1662	NA	5	1	0	Low-quality	2.31	HMM-based (lower-bound)	0
k141_1037548_length_2475_cov_491.0000	lytic	low quality draft	4	0	0	0	0	1	1	2475	NA	4	1	0	Low-quality	1.67	HMM-based (lower-bound)	0
k141_1038511_length_3942_cov_64.0000	lysogenic	low quality draft	5	1	7	4	10.35	2	10.35	3942	NA	5	1	0	Low-quality	5.23	HMM-based (lower-bound)	0
k141_1038586_length_5009_cov_14.0000	lytic	low quality draft	5	0	0	0	0	5	5.09	5009	NA	5	5	0	Low-quality	1.96	AAI-based (high-confidence)	0
k141_1039057_length_1639_cov_215.0000	lytic	low quality draft	4	0	0	1	0.93	2	6.86	1639	NA	4	1	0	Low-quality	3.09	HMM-based (lower-bound)	0
k141_1039186_length_1005_cov_3200.0000	lytic	low quality draft	4	0	0	0	0	1	0.57	1005	NA	4	1	0	Low-quality	1.46	HMM-based (lower-bound)	0
k141_1039238_length_1690_cov_64.0000	lytic	low quality draft	4	0	0	3	2.27	2	8.87	1690	NA	4	4	0	Low-quality	2.43	AAI-based (high-confidence)	0
k141_1039310_length_17314_cov_308.2960	lytic	low quality draft	7	2	6.13	2	5.94	6	23.36	17314	NA	7	3	0	Low-quality	3.73	AAI-based (high-confidence)	0
k141_1039495_length_1729_cov_621.0000	lysogenic	low quality draft	4	1	7	1	9.33	2	14.79	1729	NA	4	0	0	Low-quality	3.42	AAI-based (medium-confidence)	0	no viral genes detected
k141_1039707_length_16068_cov_202.1462	lytic	medium quality draft	12	1	1.23	0	0	5	32.12	16068	NA	12	4	0	Low-quality	5.79	AAI-based (high-confidence)	0
k141_1040071_length_11237_cov_272.0000	lysogenic	low quality draft	22	4	14.76	4	19.03	5	31.44	11237	NA	22	2	1	Low-quality	24.51	AAI-based (medium-confidence)	0
k141_1040969_length_2921_cov_260.0000	lytic	low quality draft	4	2	1.03	4	4.33	4	11.44	2921	NA	4	4	0	Low-quality	7.22	AAI-based (high-confidence)	0
k141_1041080_length_2958_cov_21.0000	lytic	low quality draft	4	0	0	2	1.21	2	0.8	2958	NA	4	2	0	Low-quality	4.01	HMM-based (lower-bound)	0
k141_1041501_length_2068_cov_12.0000	lytic	low quality draft	5	0	0	0	0	2	14.78	2068	NA	5	2	0	Low-quality	1.3	HMM-based (lower-bound)	0
k141_1041771_length_3177_cov_17.0000	lytic	low quality draft	4	0	0	0	0	2	17.34	3177	NA	4	2	0	Low-quality	8.95	AAI-based (high-confidence)	0
k141_1042705_length_7134_cov_885.0000	lytic	low quality draft	12	3	5.23	4	5.22	3	15.66	7134	NA	12	0	0	Not-determined	NA	NA	0	no viral genes detected
k141_1042826_length_6758_cov_2147.8720	lytic	low quality draft	9	1	0	3	3.94	6	26.94	6758	5484	9	5	1	Low-quality	10.97	AAI-based (high-confidence)	18.85
k141_1042978_length_3531_cov_228.4363	lytic	low quality draft	6	2	0.5	4	4.02	4	19.21	3531	NA	6	3	0	Low-quality	1.82	HMM-based (lower-bound)	0
k141_1043082_length_2209_cov_39.0000	lytic	low quality draft	5	0	0	1	1.22	2	12.83	2209	NA	5	1	0	Low-quality	2.94	HMM-based (lower-bound)	0
k141_1043244_length_3896_cov_560.5952	lytic	low quality draft	12	0	0	3	5.43	3	19.67	3896	NA	12	4	0	Low-quality	4.08	HMM-based (lower-bound)	0
k141_1043644_length_4713_cov_266.0000	lytic	low quality draft	9	2	1.15	1	0.94	4	5.72	4713	NA	8	2	0	Low-quality	1.03	AAI-based (high-confidence)	0
k141_1043890_length_2869_cov_24.0000	lytic	low quality draft	4	0	0	1	1.18	4	5.55	2869	NA	4	3	0	Low-quality	2.31	HMM-based (lower-bound)	0
k141_1045240_length_2902_cov_861.0000	lytic	low quality draft	4	2	3.92	2	5.12	3	6.03	2902	NA	4	1	0	Low-quality	2.66	HMM-based (lower-bound)	0
k141_1045252_length_9031_cov_667.5520	lytic	low quality draft	10	1	4.48	3	6.46	6	40.51	9031	NA	10	6	0	Low-quality	2.36	AAI-based (medium-confidence)	0
k141_1045370_length_1892_cov_37.0154	lytic	low quality draft	4	0	0	1	1.09	1	3.82	1892	NA	4	0	0	Not-determined	NA	NA	0	no viral genes detected
k141_1045761_length_1587_cov_14.0000	lytic	low quality draft	4	0	0	0	0	2	10.87	1587	NA	4	2	0	Low-quality	2.38	AAI-based (medium-confidence)	0
k141_1047316_length_2434_cov_1141.0000	lytic	low quality draft	5	0	0	0	0	1	3.44	2434	NA	5	0	0	Low-quality	5.47	AAI-based (medium-confidence)	0	no viral genes detected
k141_1048203_length_3428_cov_70.0000	lytic	low quality draft	8	0	0	1	0.25	2	12.11	3428	NA	8	3	0	Low-quality	3.72	HMM-based (lower-bound)	0
k141_1048501_length_2389_cov_12.0000	lytic	low quality draft	7	0	0	0	0	1	1.99	2389	NA	7	1	0	Low-quality	3.14	AAI-based (high-confidence)	0
k141_104916_length_13852_cov_125.0000	lytic	low quality draft	19	6	5.17	9	8.22	10	22.02	13852	NA	20	7	2	Low-quality	34.24	AAI-based (high-confidence)	0
k141_1050040_length_2497_cov_1778.4588	lytic	low quality draft	5	0	0	1	5.99	1	1.35	2497	NA	5	1	0	Low-quality	3.99	HMM-based (lower-bound)	0
k141_1050592_length_1893_cov_2891.0000	lytic	low quality draft	5	0	0	0	0	1	2.29	1893	NA	5	1	0	Low-quality	2.65	AAI-based (medium-confidence)	0
k141_1051447_length_5484_cov_679.0000	lytic	low quality draft	5	0	0	0	0	2	1.73	5484	NA	5	0	0	Not-determined	NA	NA	0	no viral genes detected
k141_1051454_length_2929_cov_602.0000	lytic	low quality draft	6	1	0.75	1	1.29	1	7.59	2929	NA	6	0	0	Not-determined	NA	NA	0	no viral genes detected
k141_1051637_length_6474_cov_155.1847	lytic	low quality draft	7	3	1.3	5	1.27	3	5.07	6474	NA	7	0	2	Not-determined	NA	NA	0	no viral genes detected
k141_1051886_length_5148_cov_74.0000	lytic	low quality draft	8	1	4.34	3	4.47	3	10.68	5148	NA	8	2	0	Low-quality	8.03	HMM-based (lower-bound)	0
k141_1052101_length_4707_cov_206.0000	lytic	low quality draft	14	0	0	1	0.28	2	4.38	4707	NA	14	2	0	Low-quality	2.33	HMM-based (lower-bound)	0
k141_1052291_length_5656_cov_298.0000	lytic	low quality draft	8	1	1.86	4	6.25	7	38.57	5656	NA	8	6	0	Low-quality	16.22	AAI-based (high-confidence)	0
k141_1052379_length_2643_cov_50.0000	lytic	low quality draft	5	0	0	1	0.46	2	3.65	2643	NA	5	1	0	Low-quality	4.44	AAI-based (high-confidence)	0
k141_1052445_length_2942_cov_348.4945	lytic	low quality draft	7	0	0	2	1.07	1	3.45	2942	NA	7	2	0	Low-quality	4.18	HMM-based (lower-bound)	0
k141_1053494_length_2461_cov_478.0000	lytic	low quality draft	4	0	0	1	2.88	2	20	2461	NA	4	2	0	Low-quality	1.52	HMM-based (lower-bound)	0
k141_1053506_length_2434_cov_20.0000	lytic	low quality draft	5	0	0	0	0	1	0.63	2434	NA	5	0	0	Not-determined	NA	NA	0	no viral genes detected
k141_1053854_length_9706_cov_145.6856	lytic	low quality draft	15	1	0.69	2	1.27	2	5.78	9706	NA	15	1	1	Low-quality	10.61	HMM-based (lower-bound)	0
k141_1054970_length_2432_cov_988.7490	lytic	low quality draft	4	1	1.23	2	1.6	2	5.03	2432	NA	4	1	0	Low-quality	5.02	AAI-based (medium-confidence)	0
k141_1055600_length_6471_cov_207.0000	lytic	low quality draft	15	1	0.25	3	3.13	3	20.81	6471	NA	15	1	1	Low-quality	13.61	AAI-based (high-confidence)	0
k141_1055695_length_2606_cov_1110.0000	lytic	low quality draft	5	1	1.65	3	2.43	3	6.98	2606	NA	5	2	0	Low-quality	4.42	HMM-based (lower-bound)	0
k141_1055898_length_13035_cov_284.2377	lytic	low quality draft	16	0	0	2	1.93	8	40.6	13035	NA	16	10	0	Low-quality	21.86	HMM-based (lower-bound)	0
k141_1056223_length_7539_cov_134.0000	lytic	low quality draft	11	1	4.48	2	4.95	6	50.1	7539	NA	10	6	0	Low-quality	1.87	AAI-based (medium-confidence)	0
k141_1056297_length_2392_cov_625.0000	lytic	low quality draft	4	0	0	0	0	1	0.69	2392	NA	4	1	0	Low-quality	5.17	AAI-based (high-confidence)	0
k141_1057039_length_8045_cov_939.0000	lytic	low quality draft	16	1	5.15	2	5.61	5	22.45	8045	NA	16	3	0	Low-quality	18.9	AAI-based (medium-confidence)	0
k141_1057396_length_3312_cov_249.6831	lytic	low quality draft	6	0	0	0	0	2	1.16	3312	NA	6	2	0	Low-quality	7.72	AAI-based (high-confidence)	0
k141_1057499_length_1694_cov_38.0000	lytic	low quality draft	4	0	0	3	0.77	4	8.7	1694	NA	4	4	0	Low-quality	3.82	AAI-based (medium-confidence)	0
k141_105759_length_9085_cov_281.0000	lytic	low quality draft	13	2	2.69	7	8.12	8	37.73	9085	NA	13	8	0	Low-quality	21.11	AAI-based (high-confidence)	0
k141_1057630_length_3679_cov_70.3830	lytic	low quality draft	6	1	0.01	1	0.35	1	4.29	3679	NA	6	0	0	Not-determined	NA	NA	0	no viral genes detected
k141_1057769_length_12047_cov_73.5441	lytic	low quality draft	5	0	0	0	0	1	0.76	12047	NA	5	0	0	Not-determined	NA	NA	0	no viral genes detected
k141_1058164_length_4251_cov_1664.0000	lytic	low quality draft	7	0	0	0	0	1	0.86	4251	NA	7	1	0	Low-quality	2.9	HMM-based (lower-bound)	0
k141_1058957_length_1702_cov_112.0000	lytic	low quality draft	7	0	0	1	2.75	2	6.9	1702	NA	6	1	0	Low-quality	1.22	HMM-based (lower-bound)	0
k141_1059306_length_3928_cov_253.2205	lysogenic	low quality draft	6	1	7	1	9.33	2	10.22	3928	3561	6	1	1	Low-quality	7.97	HMM-based (lower-bound)	9.34
k141_1059804_length_2093_cov_1448.0000	lytic	low quality draft	5	0	0	1	1.38	1	10	2093	NA	5	0	0	Not-determined	NA	NA	0	no viral genes detected
k141_106147_length_6261_cov_41.0000	lytic	low quality draft	5	0	0	1	0.31	5	15.05	6261	NA	5	4	0	Low-quality	14.15	AAI-based (high-confidence)	0
k141_106149_length_9902_cov_1829.5971	lytic	low quality draft	7	0	0	0	0	2	2.12	9902	NA	7	1	0	Low-quality	3.42	HMM-based (lower-bound)	0
k141_1061574_length_1319_cov_323.8285	lytic	low quality draft	5	1	4.3	0	0	2	10.57	1319	NA	5	1	0	Low-quality	1.79	AAI-based (medium-confidence)	0
k141_10617_length_5617_cov_626.0000	lysogenic	low quality draft	9	1	7	1	9.33	1	10	5617	NA	9	0	0	Not-determined	NA	NA	0	no viral genes detected
k141_1061841_length_6609_cov_336.5320	lytic	low quality draft	7	1	0.55	3	2.27	5	12.67	6609	NA	7	6	0	Low-quality	16.22	AAI-based (medium-confidence)	0
k141_1061953_length_5606_cov_1080.7550	lytic	low quality draft	6	2	0.82	2	0.55	2	1.32	5606	NA	6	0	0	Not-determined	NA	NA	0	no viral genes detected
k141_1062731_length_2134_cov_1846.0000	lytic	low quality draft	4	1	0.34	3	2.48	2	4.22	2134	NA	4	1	0	Low-quality	3.2	AAI-based (medium-confidence)	0
k141_1062909_length_2517_cov_10.0000	lytic	low quality draft	6	2	8.29	2	9.17	3	30	2517	NA	6	1	1	Low-quality	2.88	AAI-based (medium-confidence)	0
k141_106291_length_19483_cov_245.1790	lytic	low quality draft	27	5	2.69	6	3.42	5	16.93	19483	NA	28	3	1	Low-quality	8.78	HMM-based (lower-bound)	0
k141_1063237_length_1572_cov_1252.2586	lytic	low quality draft	4	0	0	0	0	2	13.34	1572	NA	4	2	0	Low-quality	2.65	HMM-based (lower-bound)	0
k141_1063294_length_3286_cov_1128.0350	lytic	low quality draft	7	2	3.36	2	4.74	2	16.89	3286	NA	7	2	0	Low-quality	7.35	AAI-based (medium-confidence)	0
k141_1063569_length_3133_cov_483.7096	lytic	low quality draft	5	0	0	0	0	2	3.76	3133	NA	5	1	0	Low-quality	5.8	AAI-based (high-confidence)	0
k141_1063798_length_1860_cov_201.0000	lytic	low quality draft	5	0	0	2	0.56	2	4.96	1860	NA	5	0	0	Low-quality	2.22	AAI-based (medium-confidence)	0	no viral genes detected
k141_1064361_length_31829_cov_97.9378	lytic	low quality draft	28	1	2.77	1	0.22	6	39.31	31829	NA	28	3	0	Low-quality	11.28	HMM-based (lower-bound)	0
k141_1064681_length_4917_cov_23.0000	lytic	low quality draft	6	0	0	1	1	5	18.02	4917	NA	6	5	0	Low-quality	6.46	AAI-based (high-confidence)	0
k141_106506_length_1616_cov_196.0000	lytic	low quality draft	4	0	0	0	0	4	5.21	1616	NA	4	4	0	Low-quality	2.94	AAI-based (medium-confidence)	0
k141_106528_length_2691_cov_136.0000	lytic	low quality draft	4	0	0	0	0	1	0.86	2691	NA	4	0	0	Not-determined	NA	NA	0	no viral genes detected
k141_1066050_length_7430_cov_33.0000	lytic	low quality draft	9	0	0	1	0.41	3	14.35	7430	NA	9	3	0	Low-quality	17.81	AAI-based (medium-confidence)	0
k141_1066097_length_1984_cov_1601.6196	lytic	low quality draft	5	0	0	0	0	1	0.07	1984	NA	5	0	0	Not-determined	NA	NA	0	no viral genes detected
k141_1066910_length_3050_cov_414.0000	lytic	low quality draft	5	1	1.08	2	2.85	2	6.7	3050	NA	5	3	0	Low-quality	7.42	AAI-based (high-confidence)	0
k141_1067199_length_4949_cov_507.6358	lytic	low quality draft	6	2	3	2	3.8	3	17.11	4949	NA	5	0	0	Low-quality	2.72	AAI-based (medium-confidence)	0	no viral genes detected
k141_1068233_length_2251_cov_1965.0000	lytic	low quality draft	5	1	0.7	1	0.94	3	23.56	2251	NA	5	2	0	Low-quality	5.47	AAI-based (medium-confidence)	0
k141_1068528_length_1410_cov_333.0000	lytic	low quality draft	4	0	0	0	0	1	2.29	1410	NA	4	1	0	Low-quality	1.39	HMM-based (lower-bound)	0
k141_1068951_length_2536_cov_957.0000	lytic	low quality draft	5	0	0	2	0.48	2	2.24	2536	NA	5	2	0	Low-quality	5.88	HMM-based (lower-bound)	0
k141_1069108_length_6211_cov_589.3959	lytic	low quality draft	11	1	2.79	2	5.08	3	21.06	6211	NA	11	2	0	Low-quality	2.1	HMM-based (lower-bound)	0
k141_1069423_length_20006_cov_417.0000	lytic	low quality draft	29	7	12.08	11	14.45	12	68.51	20006	NA	29	11	2	Low-quality	46.07	AAI-based (medium-confidence)	0
k141_1069928_length_5306_cov_191.0000	lytic	low quality draft	5	2	0.8	2	0.06	3	0.57	5306	NA	5	0	0	Low-quality	7.89	AAI-based (high-confidence)	0	no viral genes detected
k141_1071606_length_28106_cov_671.2083	lytic	medium quality draft	51	8	6.39	6	3.71	13	66.7	28106	NA	49	9	2	Low-quality	6.77	AAI-based (medium-confidence)	0
k141_1071718_length_3344_cov_1010.0000	lytic	low quality draft	5	0	0	1	0.24	1	1.15	3344	NA	5	1	0	Low-quality	5.45	AAI-based (medium-confidence)	0
k141_1072897_length_16596_cov_92.3719	lytic	low quality draft	6	0	0	0	0	1	0.01	16596	NA	6	0	0	Not-determined	NA	NA	0	no viral genes detected
k141_1072979_length_1757_cov_22.0000	lytic	low quality draft	5	0	0	1	0.2	3	11.65	1757	NA	5	3	0	Low-quality	4.57	AAI-based (medium-confidence)	0
k141_1073249_length_23648_cov_74.0000	lytic	low quality draft	33	1	0.31	2	0.12	3	1.99	23648	NA	33	1	1	Low-quality	21	HMM-based (lower-bound)	0
k141_1073491_length_6428_cov_47.0000	lytic	low quality draft	7	3	6.8	3	7.11	5	12.58	6428	NA	7	3	0	Low-quality	9.76	AAI-based (medium-confidence)	0
k141_1073550_length_1000_cov_295.0000	lytic	low quality draft	5	0	0	0	0	2	1.65	1000	NA	5	1	0	Low-quality	1.28	AAI-based (medium-confidence)	0
k141_1074168_length_5464_cov_397.0000	lytic	low quality draft	12	2	4.5	3	6.01	4	25.7	5464	NA	12	5	0	Low-quality	10.32	AAI-based (medium-confidence)	0
k141_1074519_length_2937_cov_19.0000	lysogenic	low quality draft	6	2	2.88	1	9.33	2	10.33	2937	NA	6	2	0	Low-quality	9.26	AAI-based (high-confidence)	0
k141_1074701_length_1239_cov_24.0000	lytic	low quality draft	4	0	0	1	0.46	1	0.83	1239	NA	4	0	0	Not-determined	NA	NA	0	no viral genes detected
k141_1075002_length_3244_cov_1175.0000	lytic	low quality draft	9	0	0	0	0	1	0.91	3244	NA	9	1	0	Low-quality	4.03	AAI-based (medium-confidence)	0
k141_1075149_length_16236_cov_81.3084	lytic	low quality draft	12	1	0.01	1	0.04	1	0.11	16236	NA	12	0	0	Not-determined	NA	NA	0	no viral genes detected
k141_1075165_length_1328_cov_1238.0000	lytic	low quality draft	4	0	0	1	0.2	2	1.65	1328	NA	4	2	0	Low-quality	3.31	HMM-based (lower-bound)	0
k141_1075262_length_2822_cov_292.0000	lytic	low quality draft	6	1	1.86	2	4.03	3	12.29	2822	NA	6	5	0	Low-quality	6.49	AAI-based (medium-confidence)	0
k141_107662_length_4978_cov_161.0000	lytic	low quality draft	5	0	0	0	0	1	0	4978	NA	3	0	0	Not-determined	NA	NA	0	no viral genes detected
k141_1077689_length_2187_cov_1234.5122	lytic	low quality draft	7	0	0	0	0	1	1.1	2187	NA	7	1	0	Low-quality	3.1	HMM-based (lower-bound)	0
k141_1078108_length_4645_cov_30.0000	lytic	low quality draft	7	1	0.26	1	1	1	0.16	4645	NA	7	1	0	Low-quality	1.89	HMM-based (lower-bound)	0
k141_1078586_length_1969_cov_374.0000	lytic	low quality draft	5	0	0	1	0.29	2	1.71	1969	NA	5	2	0	Low-quality	5.59	AAI-based (medium-confidence)	0
k141_1078683_length_2345_cov_69.0000	lytic	low quality draft	4	1	5.15	2	5.57	2	11.23	2345	NA	4	1	0	Low-quality	5.37	AAI-based (medium-confidence)	0
k141_1078895_length_1985_cov_47.0000	lytic	low quality draft	6	1	0.69	1	0.93	2	5.29	1985	NA	6	2	0	Low-quality	4.54	AAI-based (high-confidence)	0
k141_1078897_length_3438_cov_30.0000	lytic	low quality draft	5	0	0	0	0	1	1.67	3438	NA	5	1	0	Low-quality	1.37	HMM-based (lower-bound)	0
k141_1078915_length_3625_cov_21.0000	lytic	low quality draft	6	2	3.83	2	5.37	3	10.65	3625	NA	6	1	0	Low-quality	11.75	AAI-based (medium-confidence)	0
k141_1079035_length_3176_cov_371.0000	lytic	low quality draft	11	1	4.34	1	4.28	2	10.07	3176	NA	11	0	0	Low-quality	6.43	AAI-based (medium-confidence)	0	no viral genes detected
k141_1079231_length_2333_cov_577.0000	lytic	low quality draft	8	1	2.79	1	2.5	1	10	2333	NA	8	0	0	Not-determined	NA	NA	0	no viral genes detected
k141_1079821_length_4899_cov_778.0000	lytic	low quality draft	12	3	1.68	3	2.18	4	20.94	4899	NA	12	2	0	Low-quality	1.69	AAI-based (medium-confidence)	0
k141_1080466_length_2949_cov_475.0000	lytic	low quality draft	7	1	0.41	0	0	1	0.18	2949	NA	7	0	0	Not-determined	NA	NA	0	no viral genes detected
k141_1080472_length_2278_cov_1064.0000	lytic	low quality draft	4	0	0	0	0	1	9.64	2278	NA	4	0	0	Not-determined	NA	NA	0	no viral genes detected
k141_1080880_length_1764_cov_1264.0000	lytic	low quality draft	5	0	0	1	0.18	1	3.77	1764	NA	5	2	0	Low-quality	2.62	HMM-based (lower-bound)	0
k141_1080916_length_2890_cov_633.0000	lytic	low quality draft	5	1	2.24	1	2.02	2	8.77	2890	NA	5	2	0	Low-quality	19.93	AAI-based (medium-confidence)	0
k141_1081041_length_3269_cov_685.0000	lytic	low quality draft	5	0	0	1	0.07	1	1	3269	NA	5	2	0	Low-quality	1.73	HMM-based (lower-bound)	0
k141_1081179_length_5184_cov_216.0000	lytic	low quality draft	6	0	0	0	0	3	2.54	5184	NA	6	3	0	Low-quality	13.25	AAI-based (medium-confidence)	0
k141_1081433_length_3035_cov_1109.3998	lytic	low quality draft	4	1	2.55	2	2.81	2	11.24	3035	NA	4	0	0	Not-determined	NA	NA	0	no viral genes detected
k141_1081569_length_15069_cov_48.0000	lytic	low quality draft	24	1	0.96	3	2.17	5	31.06	15069	NA	24	6	0	Low-quality	3.14	AAI-based (medium-confidence)	0
k141_108190_length_2616_cov_642.9515	lytic	low quality draft	8	1	1.02	1	0.55	2	12.42	2616	NA	7	1	0	Low-quality	3.24	HMM-based (lower-bound)	0
k141_1082269_length_38466_cov_85.0022	lysogenic	complete circular	51	11	21.51	26	42.67	32	113.96	38466	NA	51	27	0	Complete	100	DTR (high-confidence)	0
k141_1083236_length_29068_cov_434.0150	lytic	complete circular	35	1	4.48	2	7.85	8	46.24	29068	NA	34	12	0	Low-quality	46.78	HMM-based (lower-bound)	0	low-confidence DTR
k141_1083981_length_11734_cov_595.8150	lytic	low quality draft	13	2	8.29	4	12.35	4	36.23	11734	NA	13	2	1	Low-quality	13.65	AAI-based (medium-confidence)	0
k141_1084059_length_6019_cov_292.0817	lytic	low quality draft	7	0	0	2	3.04	4	24.38	6019	NA	6	3	0	Low-quality	2.06	HMM-based (lower-bound)	0
k141_1084300_length_61810_cov_75.0012	lytic	complete circular	98	7	20.41	8	13.87	40	181.02	61810	NA	98	37	0	Complete	100	DTR (high-confidence)	0
k141_1084620_length_5527_cov_114.0212	lytic	complete circular	8	0	0	7	16	7	37.74	5527	NA	8	8	0	Complete	100	DTR (high-confidence)	0
k141_1085166_length_4580_cov_458.0000	lytic	low quality draft	5	1	2.77	2	3.88	3	13.18	4580	NA	5	3	0	Low-quality	13.68	AAI-based (medium-confidence)	0
k141_1085195_length_1771_cov_808.0000	lytic	low quality draft	4	0	0	1	2.21	2	8.62	1771	NA	4	1	0	Low-quality	2.47	HMM-based (lower-bound)	0
k141_1085253_length_14456_cov_129.4832	lysogenic	medium quality draft	29	6	19.68	4	15.66	6	44.29	14456	NA	29	1	0	Low-quality	7.69	HMM-based (lower-bound)	0
k141_1085696_length_45907_cov_245.0054	lytic	complete circular	74	8	25.64	16	29.37	22	125.57	45907	NA	74	22	1	Complete	100	DTR (high-confidence)	0
k141_1085751_length_3647_cov_24.0068	lytic	complete circular	7	0	0	0	0	1	0.04	3647	NA	7	1	0	Complete	100	DTR (high-confidence)	0
k141_1086159_length_2578_cov_418.7952	lytic	low quality draft	5	0	0	1	7.58	2	1.14	2578	NA	5	3	0	Low-quality	3.47	HMM-based (lower-bound)	0
k141_1086589_length_50192_cov_58.0012	lysogenic	complete circular	64	11	33.71	20	33.56	28	133.67	50192	NA	64	29	0	Complete	100	DTR (high-confidence)	0
k141_1086727_length_2290_cov_46.0000	lytic	low quality draft	6	0	0	1	0.27	1	1.06	2290	NA	6	0	0	Not-determined	NA	NA	0	no viral genes detected
k141_1086892_length_4934_cov_1442.6518	lytic	low quality draft	8	1	4.5	1	2.85	2	2.35	4934	NA	8	2	0	Low-quality	11.15	AAI-based (high-confidence)	0
k141_1087081_length_1702_cov_145.0000	lytic	low quality draft	4	0	0	1	1.3	1	10	1702	NA	4	1	0	Low-quality	3.72	AAI-based (medium-confidence)	0
k141_1087387_length_50124_cov_4100.0820	lytic	complete circular	75	8	16.74	11	20.73	46	177.52	50124	NA	75	47	0	Complete	100	DTR (high-confidence)	0
k141_1088527_length_2515_cov_48.0000	lytic	low quality draft	4	1	2.41	1	5.99	3	20.08	2515	NA	4	0	0	Low-quality	5.39	AAI-based (high-confidence)	0	no viral genes detected
k141_1088607_length_38462_cov_159.4498	lytic	complete circular	50	12	34.11	18	34.43	27	121.26	38462	NA	50	19	0	Complete	100	DTR (high-confidence)	0
k141_1089164_length_1540_cov_6.0000	lytic	low quality draft	5	0	0	0	0	1	0.41	1540	NA	5	1	0	Low-quality	2.29	HMM-based (lower-bound)	0
k141_1089313_length_40245_cov_53.0013	lysogenic	complete circular	63	12	19.83	30	55.02	36	142.74	40245	NA	63	35	1	Complete	100	DTR (medium-confidence)	0
k141_1089637_length_3611_cov_129.9467	lytic	low quality draft	7	0	0	1	0.04	1	1.41	3611	NA	7	0	0	Not-determined	NA	NA	0	no viral genes detected
k141_1089659_length_3988_cov_1130.1851	lytic	low quality draft	4	0	0	1	0.47	1	1.04	3988	NA	4	2	0	Low-quality	9.84	AAI-based (medium-confidence)	0
k141_1089831_length_3742_cov_1301.0000	lytic	low quality draft	6	0	0	0	0	1	0.23	3742	NA	6	1	0	Low-quality	1.41	HMM-based (lower-bound)	0
k141_1090129_length_3235_cov_53.0000	lytic	low quality draft	4	0	0	0	0	1	3.32	3235	NA	4	1	0	Low-quality	3.53	AAI-based (medium-confidence)	0
k141_1090837_length_3285_cov_1662.0000	lytic	low quality draft	7	1	0.96	0	0	2	6.87	3285	NA	7	3	0	Low-quality	1.64	AAI-based (medium-confidence)	0
k141_1090869_length_34805_cov_211.0061	lysogenic	complete circular	51	7	22.02	12	37.09	18	110	34805	NA	51	20	0	Complete	100	DTR (medium-confidence)	0
k141_1091141_length_1786_cov_105.0000	lytic	low quality draft	5	0	0	1	0.02	2	1.54	1786	NA	5	1	0	Low-quality	0.83	HMM-based (lower-bound)	0
k141_1091167_length_13729_cov_245.0180	lysogenic	complete circular	18	3	10.86	4	10.78	2	10.55	13729	NA	18	1	0	Low-quality	24.71	HMM-based (lower-bound)	0	low-confidence DTR
k141_1091562_length_1535_cov_1668.0000	lytic	low quality draft	4	0	0	0	0	1	0.79	1535	NA	4	1	0	Low-quality	2.97	AAI-based (medium-confidence)	0
k141_1092009_length_43677_cov_449.0103	lytic	complete circular	86	11	37	20	53.52	46	218.1	43677	NA	86	41	0	Complete	100	DTR (high-confidence)	0
k141_1092181_length_16172_cov_1819.0522_fragment_1	lysogenic	low quality draft	9	2	3.87	3	9.85	4	21.86	6595	4384	10	1	1	Low-quality	16.17	AAI-based (medium-confidence)	33.53
k141_1092605_length_2311_cov_1188.0000	lytic	low quality draft	4	1	0.25	0	0	3	13.38	2311	NA	4	2	0	Low-quality	4.56	AAI-based (medium-confidence)	0
k141_1092805_length_43418_cov_2252.0520	lysogenic	complete circular	62	15	29.14	24	49.86	47	162.54	43418	NA	63	44	0	Complete	100	DTR (high-confidence)	0
k141_1093550_length_4183_cov_26.0064	lytic	complete circular	5	1	0.72	1	0.02	2	2.21	4183	NA	6	1	0	Complete	100	DTR (high-confidence)	0
k141_1093926_length_13524_cov_28.0000	lytic	low quality draft	19	2	5.17	3	10	5	32.78	13524	NA	20	8	0	Low-quality	20.3	HMM-based (lower-bound)	0
k141_1094026_length_2405_cov_18.0000	lytic	low quality draft	6	0	0	0	0	3	11.2	2405	NA	6	2	0	Low-quality	3.6	AAI-based (medium-confidence)	0
k141_1094156_length_4503_cov_1629.0000	lytic	low quality draft	6	1	0.55	1	1	1	1.07	4503	NA	6	1	0	Low-quality	1.83	HMM-based (lower-bound)	0
k141_1094290_length_1281_cov_2231.0000	lytic	low quality draft	5	1	4.34	1	4.28	2	10.2	1281	NA	5	0	0	Low-quality	1.05	AAI-based (medium-confidence)	0	no viral genes detected
k141_1094843_length_4056_cov_396.1011	lytic	complete circular	7	1	2.76	2	4.05	1	10	4056	NA	7	0	0	Low-quality	8.01	AAI-based (medium-confidence)	0	no viral genes detected; low-confidence DTR
k141_1095210_length_1676_cov_28.0000	lytic	low quality draft	6	0	0	1	0.93	1	4.77	1676	NA	6	1	0	Low-quality	3.2	AAI-based (medium-confidence)	0
k141_1095883_length_2844_cov_598.0000	lytic	low quality draft	4	1	0.02	1	0.22	2	1.24	2844	NA	4	0	1	Low-quality	1.27	AAI-based (medium-confidence)	0	no viral genes detected
k141_1096273_length_5537_cov_697.0000	lytic	low quality draft	12	1	1.33	1	1.25	3	7.56	5537	NA	12	2	0	Low-quality	1.82	HMM-based (lower-bound)	0
k141_109629_length_1961_cov_14.0000	lytic	low quality draft	4	1	1.23	1	1.24	2	2.21	1961	NA	4	1	0	Low-quality	4.56	AAI-based (medium-confidence)	0
k141_1096451_length_3746_cov_3373.0297	lytic	low quality draft	4	2	2.24	3	6.29	3	19.11	3746	NA	4	0	0	Low-quality	8.56	AAI-based (medium-confidence)	0	no viral genes detected
k141_1096840_length_4296_cov_796.0000	lytic	low quality draft	10	0	0	0	0	3	13.15	4296	NA	10	1	0	Low-quality	2.11	HMM-based (lower-bound)	0
k141_1097167_length_1983_cov_1729.0000	lytic	low quality draft	4	0	0	0	0	2	6.14	1983	NA	4	2	0	Low-quality	4.26	AAI-based (high-confidence)	0
k141_1097483_length_1646_cov_940.0000	lytic	low quality draft	4	1	0.15	1	0.15	2	0.63	1646	NA	4	0	0	Not-determined	NA	NA	0	no viral genes detected
k141_1097897_length_2766_cov_1140.0000	lytic	low quality draft	4	1	0.4	2	0.03	2	0.52	2766	NA	4	0	0	Low-quality	3.67	AAI-based (medium-confidence)	0	no viral genes detected
k141_1098059_length_2125_cov_18.0000	lytic	low quality draft	4	1	1.23	0	0	2	14.77	2125	NA	4	1	0	Low-quality	3.39	HMM-based (lower-bound)	0
k141_1098953_length_9468_cov_983.8272	lytic	low quality draft	9	0	0	0	0	3	5.6	9468	NA	10	2	0	Low-quality	4.43	HMM-based (lower-bound)	0
k141_1099193_length_5714_cov_309.0000	lytic	low quality draft	10	2	3.69	2	8.52	3	24.77	5714	NA	10	2	0	Low-quality	6.92	HMM-based (lower-bound)	0
k141_1099308_length_3734_cov_2336.0000	lytic	low quality draft	4	0	0	2	0.76	3	20.71	3734	NA	4	3	0	Low-quality	9.69	AAI-based (medium-confidence)	0
k141_1099611_length_2302_cov_924.0000	lytic	low quality draft	4	0	0	0	0	1	0.53	2302	NA	4	1	0	Low-quality	4.27	HMM-based (lower-bound)	0
k141_1100038_length_38105_cov_285.0381	lytic	medium quality draft	48	8	17.53	9	23.5	23	70.18	38105	NA	48	14	0	Low-quality	15.51	AAI-based (high-confidence)	0
k141_1100910_length_3342_cov_745.1590	lytic	low quality draft	6	1	1.06	1	0.13	2	3.37	3342	NA	6	1	0	Low-quality	3.31	HMM-based (lower-bound)	0
k141_1101553_length_2871_cov_150.0000	lytic	low quality draft	8	1	0.72	2	1.15	4	6.35	2871	NA	8	5	0	Low-quality	6.35	AAI-based (high-confidence)	0
k141_1101756_length_2392_cov_111.0000	lytic	low quality draft	5	1	2.25	2	5.46	2	14.18	2392	NA	5	2	0	Low-quality	4.71	AAI-based (medium-confidence)	0
k141_1102460_length_3616_cov_747.0052	lytic	low quality draft	6	0	0	1	0.35	1	4.29	3616	NA	6	0	0	Not-determined	NA	NA	0	no viral genes detected
k141_1102900_length_5169_cov_25.0000	lytic	low quality draft	12	2	4.53	2	4.7	3	15.29	5169	NA	11	2	0	Low-quality	9.11	HMM-based (lower-bound)	0
k141_1103206_length_3252_cov_1035.0000	lytic	low quality draft	10	0	0	1	1	2	11.28	3252	NA	10	1	0	Low-quality	9.57	AAI-based (high-confidence)	0
k141_1103213_length_2711_cov_949.7619	lytic	low quality draft	5	2	1.88	3	5.4	4	22.29	2711	NA	5	5	0	Low-quality	6.2	AAI-based (medium-confidence)	0
k141_1103385_length_1776_cov_159.4434	lytic	low quality draft	4	0	0	2	1.12	2	3.46	1776	NA	4	2	0	Low-quality	2.98	HMM-based (lower-bound)	0
k141_1103503_length_12466_cov_276.3399	lytic	low quality draft	7	0	0	0	0	1	0.01	12466	NA	7	0	0	Not-determined	NA	NA	0	no viral genes detected
k141_1103661_length_1320_cov_460.0000	lytic	low quality draft	4	0	0	0	0	1	10	1320	NA	4	1	0	Low-quality	2.01	AAI-based (medium-confidence)	0
k141_1104127_length_1241_cov_73.0000	lytic	low quality draft	4	0	0	0	0	1	10	1241	NA	4	1	0	Low-quality	0.65	HMM-based (lower-bound)	0
k141_1104154_length_3214_cov_376.0000	lytic	low quality draft	5	0	0	1	1	1	10	3214	NA	5	1	0	Low-quality	8.02	AAI-based (medium-confidence)	0
k141_1104374_length_2256_cov_22.0000	lytic	low quality draft	5	0	0	1	0.97	5	19.19	2256	NA	5	5	0	Low-quality	4.59	AAI-based (medium-confidence)	0
k141_1104441_length_3385_cov_1586.1560	lytic	low quality draft	7	0	0	2	2.22	6	18.68	3385	NA	7	7	0	Low-quality	7.51	AAI-based (medium-confidence)	0
k141_11045_length_3486_cov_537.0000	lytic	low quality draft	6	1	3.81	1	5.1	1	3.44	3486	NA	6	1	0	Low-quality	5.67	AAI-based (medium-confidence)	0
k141_1104605_length_2147_cov_1053.0000	lytic	low quality draft	6	0	0	1	1.34	1	3.72	2147	NA	6	0	0	Not-determined	NA	NA	0	no viral genes detected
k141_1105039_length_1793_cov_57.0000	lytic	low quality draft	6	0	0	0	0	1	0.38	1793	NA	6	1	0	Low-quality	0.49	HMM-based (lower-bound)	0
k141_1106332_length_2803_cov_241.0000	lytic	low quality draft	5	0	0	0	0	1	0.41	2803	NA	5	1	0	Low-quality	1.4	HMM-based (lower-bound)	0
k141_1106631_length_2084_cov_526.0000	lytic	low quality draft	4	0	0	0	0	1	1.02	2084	NA	4	2	0	Low-quality	0.7	HMM-based (lower-bound)	0
k141_1106711_length_1686_cov_1541.0078	lytic	low quality draft	5	0	0	0	0	1	0.86	1686	NA	5	0	0	Low-quality	3.37	AAI-based (medium-confidence)	0	no viral genes detected
k141_1106986_length_2283_cov_228.0000	lytic	low quality draft	4	0	0	2	2	1	0.54	2283	NA	4	1	0	Low-quality	5.7	AAI-based (medium-confidence)	0
k141_1107527_length_3919_cov_32.9518	lytic	low quality draft	7	1	4.45	1	5.4	1	10	3919	NA	7	0	0	Low-quality	2.78	AAI-based (medium-confidence)	0	no viral genes detected
k141_1107803_length_2303_cov_199.8279	lytic	low quality draft	4	0	0	2	3.31	1	0.63	2303	NA	4	1	0	Low-quality	5.21	AAI-based (medium-confidence)	0
k141_1107952_length_2263_cov_470.0000	lytic	low quality draft	4	1	3.7	1	4.63	2	10.25	2263	NA	4	2	0	Low-quality	1.02	HMM-based (lower-bound)	0
k141_1108033_length_1349_cov_263.0000	lytic	low quality draft	4	0	0	0	0	1	0.31	1349	NA	3	0	0	Low-quality	0.29	AAI-based (medium-confidence)	0	no viral genes detected
k141_1108088_length_3914_cov_395.0000	lytic	low quality draft	8	1	4.34	4	9.26	3	19.37	3914	NA	8	2	0	Low-quality	9.62	AAI-based (high-confidence)	0
k141_1108187_length_17878_cov_85.2362	lytic	medium quality draft	30	6	3.45	8	5.52	12	56.25	17878	NA	30	9	1	Low-quality	4.67	AAI-based (medium-confidence)	0
k141_1108330_length_1473_cov_68.0000	lytic	low quality draft	4	0	0	0	0	2	1.22	1473	NA	4	2	0	Low-quality	1.56	HMM-based (lower-bound)	0
k141_1108757_length_2581_cov_646.1787	lytic	low quality draft	6	0	0	1	0.17	2	3.77	2581	NA	6	1	0	Low-quality	0.93	HMM-based (lower-bound)	0
k141_110920_length_1557_cov_52.0000	lytic	low quality draft	4	0	0	2	1.31	2	6.73	1557	NA	4	2	0	Low-quality	3.21	AAI-based (medium-confidence)	0
k141_1109442_length_5619_cov_1027.9901	lytic	low quality draft	13	3	0.55	3	0.55	4	4.97	5619	NA	13	1	1	Low-quality	1.59	HMM-based (lower-bound)	0
k141_110945_length_4839_cov_568.0000	lytic	low quality draft	6	1	4.34	2	4.29	2	10.21	4839	NA	6	1	0	Low-quality	6.68	HMM-based (lower-bound)	0
k141_1109762_length_32422_cov_21.0000	lytic	medium quality draft	29	3	3.54	3	4.67	10	11.94	32422	NA	29	14	0	Low-quality	14.23	AAI-based (medium-confidence)	0
k141_1110451_length_1742_cov_80.0000	lytic	low quality draft	5	0	0	2	0.46	3	2.34	1742	NA	5	2	0	Low-quality	4.5	AAI-based (medium-confidence)	0
k141_1111288_length_2391_cov_344.0000	lytic	low quality draft	9	0	0	0	0	1	3.06	2391	NA	9	1	0	Low-quality	1.29	HMM-based (lower-bound)	0
k141_1111439_length_1896_cov_21.0000	lytic	low quality draft	4	0	0	0	0	3	2.16	1896	NA	4	2	0	Low-quality	0.74	AAI-based (high-confidence)	0
k141_1112045_length_2513_cov_65.0000	lytic	low quality draft	6	0	0	0	0	1	2.21	2513	NA	6	1	0	Low-quality	2.26	HMM-based (lower-bound)	0
k141_1112059_length_1981_cov_723.0000	lytic	low quality draft	4	0	0	1	5.12	2	3.7	1981	NA	4	3	0	Low-quality	5.05	AAI-based (high-confidence)	0
k141_1112271_length_4269_cov_89.0216	lytic	complete circular	4	0	0	2	1.55	1	3.08	4269	NA	4	0	0	Not-determined	NA	NA	0	no viral genes detected; low-confidence DTR
k141_1112473_length_39599_cov_74.0000	lytic	low quality draft	36	1	4.45	2	5.56	16	52.47	39599	NA	36	15	0	Low-quality	15.89	AAI-based (high-confidence)	0
k141_1112510_length_3213_cov_947.0000	lytic	low quality draft	6	2	1.91	1	1.24	3	21.22	3213	NA	6	1	0	Low-quality	1.72	HMM-based (lower-bound)	0
k141_1112847_length_9739_cov_59.0000	lytic	low quality draft	22	4	8.62	10	12.89	12	36.87	9739	NA	24	11	0	Low-quality	21.85	AAI-based (high-confidence)	0
k141_111285_length_8765_cov_186.8961	lytic	low quality draft	12	0	0	3	4.08	3	17.98	8765	NA	11	6	0	Low-quality	12.09	HMM-based (lower-bound)	0
k141_111332_length_4994_cov_209.0000	lytic	low quality draft	5	0	0	1	0.91	1	4.04	4994	NA	5	0	0	Not-determined	NA	NA	0	no viral genes detected
k141_1114217_length_1793_cov_740.0000	lytic	low quality draft	4	0	0	0	0	1	1.79	1793	NA	4	1	0	Low-quality	4.32	AAI-based (high-confidence)	0
k141_111473_length_1117_cov_26.0000	lytic	low quality draft	4	0	0	0	0	1	0.06	1117	NA	4	0	0	Not-determined	NA	NA	0	no viral genes detected
k141_111475_length_6197_cov_29.0000	lytic	low quality draft	7	1	0.15	1	0.15	2	1.05	6197	NA	7	0	0	Not-determined	NA	NA	0	no viral genes detected
k141_1115499_length_24500_cov_316.1372	lytic	low quality draft	18	0	0	0	0	16	31	24500	NA	18	16	0	Low-quality	33.14	AAI-based (medium-confidence)	0	high kmer_freq may indicate large duplication; low-confidence ITR
k141_1116514_length_1387_cov_313.0000	lytic	low quality draft	4	0	0	0	0	1	0.59	1387	NA	4	0	0	Not-determined	NA	NA	0	no viral genes detected
k141_1116569_length_25682_cov_804.0713	lytic	low quality draft	31	7	6.61	6	3.48	13	67.17	25682	NA	31	5	2	Low-quality	6.06	AAI-based (medium-confidence)	0
k141_1116680_length_2633_cov_1191.0000	lytic	low quality draft	5	0	0	2	2.49	3	23.82	2633	NA	5	2	0	Low-quality	10.15	AAI-based (medium-confidence)	0
k141_1116785_length_2964_cov_843.0000	lytic	low quality draft	6	2	0.8	3	0.86	3	13.34	2964	NA	6	1	0	Low-quality	1.19	HMM-based (lower-bound)	0
k141_1117107_length_1213_cov_475.0000	lytic	low quality draft	4	0	0	0	0	3	3.77	1213	NA	4	4	0	Low-quality	2.6	AAI-based (medium-confidence)	0
k141_1117348_length_1287_cov_375.1719	lytic	low quality draft	4	0	0	1	0.89	1	5.51	1287	NA	4	1	0	Low-quality	2.57	AAI-based (high-confidence)	0
k141_11180_length_3083_cov_13.0000	lytic	low quality draft	5	0	0	1	0.86	1	4.46	3083	NA	5	1	0	Low-quality	2.76	HMM-based (lower-bound)	0
k141_1118528_length_2834_cov_3528.1704	lytic	low quality draft	6	0	0	3	2.27	4	11.06	2834	NA	6	5	0	Low-quality	5.75	HMM-based (lower-bound)	0
k141_1118876_length_19210_cov_202.5258	lytic	high quality draft	25	3	3.45	5	7.85	11	93.96	19210	NA	25	9	0	Low-quality	12.47	AAI-based (medium-confidence)	0
k141_1119039_length_7792_cov_833.0596	lytic	low quality draft	11	1	2.17	1	2.15	8	13.27	7792	NA	11	6	0	Low-quality	3.22	AAI-based (medium-confidence)	0
k141_1119205_length_2410_cov_416.0000	lytic	low quality draft	6	0	0	0	0	2	2.05	2410	NA	6	1	0	Low-quality	5.82	AAI-based (medium-confidence)	0
k141_1119561_length_1749_cov_62.0000	lytic	low quality draft	4	0	0	0	0	2	3.26	1749	NA	4	1	0	Low-quality	2.46	AAI-based (medium-confidence)	0
k141_1119572_length_2526_cov_1434.0000	lytic	low quality draft	5	0	0	2	1.34	2	13.98	2526	NA	5	4	0	Low-quality	3.7	HMM-based (lower-bound)	0
k141_1119724_length_2962_cov_747.0000	lytic	low quality draft	5	0	0	1	2.88	2	19.01	2962	NA	5	2	0	Low-quality	2.19	HMM-based (lower-bound)	0
k141_1119730_length_4507_cov_272.0000	lytic	low quality draft	6	1	1	2	1.59	1	1.64	4507	NA	6	0	0	Low-quality	8.02	AAI-based (medium-confidence)	0	no viral genes detected
k141_1120097_length_1894_cov_838.0000	lytic	low quality draft	5	0	0	0	0	1	10	1894	NA	5	2	0	Low-quality	4.45	AAI-based (medium-confidence)	0
k141_1120358_length_4892_cov_939.8240	lytic	low quality draft	8	0	0	1	1	4	32.35	4892	NA	8	6	0	Low-quality	8.09	HMM-based (lower-bound)	0
k141_1120975_length_1485_cov_970.1875	lytic	low quality draft	4	1	4.45	2	9.66	2	11.07	1485	NA	4	1	0	Low-quality	2.1	AAI-based (medium-confidence)	0
k141_1121500_length_1222_cov_36.0000	lytic	low quality draft	4	0	0	1	5.99	1	10	1222	NA	4	0	0	Low-quality	2.85	AAI-based (high-confidence)	0	no viral genes detected
k141_1122335_length_1496_cov_105.0000	lytic	low quality draft	4	0	0	0	0	1	0.16	1496	NA	4	1	0	Low-quality	3.97	AAI-based (medium-confidence)	0
k141_1122431_length_2334_cov_57.0000	lytic	low quality draft	4	0	0	2	0.31	3	10.01	2334	NA	4	2	0	Low-quality	5.28	HMM-based (lower-bound)	0
k141_1123053_length_1656_cov_59.0000	lytic	low quality draft	4	0	0	0	0	1	2.33	1656	NA	4	1	0	Low-quality	0.99	AAI-based (medium-confidence)	0
k141_1123648_length_1141_cov_477.0000	lytic	low quality draft	4	0	0	0	0	1	3.33	1141	NA	4	0	0	Not-determined	NA	NA	0	no viral genes detected
k141_112367_length_5705_cov_83.0000	lytic	low quality draft	11	2	0.26	3	2.93	5	12.75	5705	NA	11	4	1	Low-quality	14.57	AAI-based (high-confidence)	0
k141_1123931_length_13899_cov_212.3827	lytic	low quality draft	14	0	0	4	5.68	11	62.05	13899	NA	14	12	0	Low-quality	28.68	AAI-based (high-confidence)	0
k141_112400_length_3180_cov_56.0000	lytic	low quality draft	7	1	0.08	1	0.08	2	0.8	3180	NA	7	1	0	Low-quality	0.84	HMM-based (lower-bound)	0
k141_1124105_length_1851_cov_19.0000	lytic	low quality draft	4	0	0	3	4.68	2	15.24	1851	NA	4	3	0	Low-quality	3.88	AAI-based (high-confidence)	0
k141_1124169_length_1543_cov_661.0000	lytic	low quality draft	4	0	0	0	0	1	2.24	1543	NA	4	1	0	Low-quality	0.88	HMM-based (lower-bound)	0
k141_1125032_length_3376_cov_1720.9573	lytic	low quality draft	6	1	1.03	1	1.02	3	9.64	3376	NA	6	0	0	Low-quality	0.9	AAI-based (medium-confidence)	0	no viral genes detected
k141_1125956_length_3398_cov_1148.1311	lytic	low quality draft	7	2	2.38	2	1.33	2	12.99	3398	NA	7	1	0	Low-quality	3.07	HMM-based (lower-bound)	0
k141_1126200_length_8047_cov_213.6389	lytic	low quality draft	6	0	0	0	0	2	2.48	8047	NA	6	2	0	Low-quality	7	AAI-based (medium-confidence)	0
k141_1126250_length_3682_cov_432.0000	lytic	low quality draft	9	1	0.69	6	4.3	6	18.94	3682	NA	9	6	0	Low-quality	6.75	AAI-based (high-confidence)	0
k141_112631_length_4336_cov_3441.6625	lytic	low quality draft	8	1	0.72	3	3.94	4	17.74	4336	NA	8	4	0	Low-quality	10.13	AAI-based (high-confidence)	0
k141_1126672_length_1761_cov_1071.4049	lytic	low quality draft	6	0	0	0	0	2	2.59	1761	NA	6	1	0	Low-quality	3.45	AAI-based (medium-confidence)	0
k141_1127307_length_8782_cov_162.1167	lytic	low quality draft	11	1	2.17	1	2.15	3	14.92	8782	NA	11	3	0	Low-quality	4.34	HMM-based (lower-bound)	0
k141_1127901_length_2064_cov_850.0000	lytic	low quality draft	6	0	0	0	0	4	6.98	2064	NA	6	3	0	Low-quality	4.28	AAI-based (high-confidence)	0
k141_1128017_length_2251_cov_151.0000	lytic	low quality draft	5	2	4.49	2	11.98	3	24.29	2251	NA	5	0	0	Not-determined	NA	NA	0	no viral genes detected
k141_1128050_length_3343_cov_1366.0000	lytic	low quality draft	8	0	0	0	0	2	10.86	3343	NA	7	1	0	Low-quality	6.62	AAI-based (medium-confidence)	0
k141_1129303_length_1878_cov_302.1693	lytic	low quality draft	6	0	0	2	2.19	1	1	1878	NA	6	3	0	Low-quality	4.39	AAI-based (medium-confidence)	0
k141_1129597_length_1233_cov_1302.0330	lytic	low quality draft	5	0	0	0	0	1	2.24	1233	NA	5	1	0	Low-quality	0.7	HMM-based (lower-bound)	0
k141_1129694_length_7255_cov_256.0000	lytic	low quality draft	13	1	0.02	1	0.02	3	14.25	7255	NA	13	3	1	Low-quality	3.07	HMM-based (lower-bound)	0
k141_1129789_length_1876_cov_256.0000	lytic	low quality draft	4	1	4.45	1	5.4	2	17.01	1876	NA	4	0	0	Low-quality	1.36	AAI-based (medium-confidence)	0	no viral genes detected
k141_1130466_length_1654_cov_7.0000	lytic	low quality draft	4	0	0	1	0.52	1	0.11	1654	NA	4	1	0	Low-quality	2.9	HMM-based (lower-bound)	0
k141_1130890_length_7355_cov_429.0000	lytic	low quality draft	7	0	0	0	0	2	20	7355	NA	7	2	0	Low-quality	2.54	HMM-based (lower-bound)	0
k141_1131051_length_2702_cov_205.0000	lytic	low quality draft	6	0	0	0	0	2	6.43	2702	NA	6	2	0	Low-quality	6.39	AAI-based (medium-confidence)	0
k141_1131126_length_2545_cov_26.0000	lytic	low quality draft	5	0	0	2	3.88	4	35.99	2545	NA	5	4	0	Low-quality	3.54	HMM-based (lower-bound)	0
k141_1131394_length_3463_cov_492.6412	lytic	low quality draft	5	1	2.77	0	0	3	30	3463	NA	5	4	0	Low-quality	1.26	HMM-based (lower-bound)	0
k141_113164_length_3124_cov_994.0000	lytic	low quality draft	4	0	0	0	0	1	0.86	3124	NA	4	1	0	Low-quality	7.27	AAI-based (medium-confidence)	0
k141_1131977_length_3738_cov_1354.6475	lytic	low quality draft	6	0	0	1	2.88	2	20	3738	NA	6	1	0	Low-quality	7.04	AAI-based (high-confidence)	0
k141_113223_length_5589_cov_732.9029	lytic	low quality draft	6	0	0	1	2.85	2	10.34	5589	NA	6	3	0	Low-quality	1.52	HMM-based (lower-bound)	0
k141_1132705_length_10691_cov_611.2272	lytic	low quality draft	6	1	0.23	1	0.23	1	0.44	10691	NA	6	0	1	Not-determined	NA	NA	0	no viral genes detected
k141_1132837_length_1635_cov_71.0000	lytic	low quality draft	4	0	0	0	0	3	2.8	1635	NA	4	2	0	Low-quality	3.89	AAI-based (high-confidence)	0
k141_1133121_length_3261_cov_1249.1260	lytic	low quality draft	4	0	0	2	2	2	12.46	3261	NA	4	4	0	Low-quality	4.53	HMM-based (lower-bound)	0
k141_1133150_length_2016_cov_51.0000	lytic	low quality draft	5	0	0	1	1	2	7.95	2016	NA	5	4	0	Low-quality	2.89	AAI-based (high-confidence)	0
k141_1133872_length_6538_cov_95.0000	lysogenic	low quality draft	6	3	12.26	3	5.33	4	20.31	6538	NA	6	0	0	Low-quality	13.59	AAI-based (medium-confidence)	0	no viral genes detected
k141_1134244_length_2745_cov_45.0000	lytic	low quality draft	4	1	3.7	1	4.63	2	19.33	2745	NA	4	2	0	Low-quality	0.75	AAI-based (medium-confidence)	0
k141_113495_length_1727_cov_1083.0000	lytic	low quality draft	6	0	0	0	0	1	0.15	1727	NA	6	1	0	Low-quality	3.41	AAI-based (medium-confidence)	0
k141_1136162_length_4299_cov_78.0000	lytic	low quality draft	9	1	3.5	3	4.13	3	4.01	4299	NA	9	2	0	Low-quality	9.22	AAI-based (high-confidence)	0
k141_113622_length_1893_cov_1307.0000	lytic	low quality draft	7	1	0.02	1	0.22	1	3.65	1893	NA	7	1	0	Low-quality	1.18	HMM-based (lower-bound)	0
k141_113667_length_6085_cov_391.0964	lytic	low quality draft	11	1	0.41	4	13.17	4	25.91	6085	NA	11	4	0	Low-quality	10.61	AAI-based (medium-confidence)	0
k141_1136743_length_3470_cov_45.0000	lytic	low quality draft	5	2	4.21	2	5.24	3	11.36	3470	2596	5	1	1	Low-quality	3.11	AAI-based (medium-confidence)	25.19
k141_1138129_length_2337_cov_30.0000	lytic	low quality draft	4	0	0	1	1.09	1	3.82	2337	NA	5	0	0	Not-determined	NA	NA	0	no viral genes detected
k141_1140064_length_5398_cov_214.8830	lytic	low quality draft	5	0	0	1	1.09	2	5.73	5398	NA	5	1	0	Low-quality	7.17	HMM-based (lower-bound)	0
k141_1140942_length_2541_cov_139.0000	lytic	low quality draft	4	1	0.08	2	0.27	2	1.65	2541	2170	4	2	1	Low-quality	5.4	HMM-based (lower-bound)	14.6
k141_1141084_length_1902_cov_92.0000	lytic	low quality draft	6	0	0	1	0.29	2	1.71	1902	NA	6	2	0	Low-quality	5.68	AAI-based (medium-confidence)	0
k141_1141819_length_3242_cov_171.0000	lytic	low quality draft	9	0	0	1	1.95	1	6.82	3242	NA	9	1	0	Low-quality	0.85	HMM-based (lower-bound)	0
k141_1142065_length_5139_cov_586.0490	lysogenic	low quality draft	4	2	8	2	10.63	3	28.05	5139	NA	4	1	0	Low-quality	3.28	HMM-based (lower-bound)	0
k141_1143286_length_2548_cov_1857.0382	lytic	low quality draft	6	2	3.37	2	2.68	3	15.13	2548	NA	6	1	0	Low-quality	1.78	AAI-based (medium-confidence)	0
k141_1144002_length_3929_cov_152.0000	lytic	low quality draft	9	3	8.1	2	6.75	3	29.05	3929	NA	9	2	0	Low-quality	7.8	AAI-based (medium-confidence)	0
k141_1144967_length_4463_cov_508.0000	lytic	low quality draft	7	1	2.88	2	1.12	3	11.84	4463	NA	7	3	0	Low-quality	10.67	AAI-based (high-confidence)	0
k141_1145001_length_1675_cov_8.0000	lytic	low quality draft	5	1	2.79	1	2.5	2	11.1	1675	NA	5	1	0	Low-quality	1.36	AAI-based (medium-confidence)	0
k141_114513_length_7380_cov_396.2724	lytic	low quality draft	10	0	0	0	0	1	0.86	7380	NA	10	1	0	Low-quality	13.94	HMM-based (lower-bound)	0
k141_1145890_length_5595_cov_55.0000	lysogenic	low quality draft	13	1	2.87	1	9.33	1	0.06	5595	NA	13	0	0	Not-determined	NA	NA	0	no viral genes detected
k141_1147358_length_8581_cov_49.0000	lytic	low quality draft	10	0	0	1	0.91	2	1.83	8581	NA	10	2	0	Low-quality	2.86	HMM-based (lower-bound)	0
k141_1147463_length_16745_cov_125.0000	lytic	medium quality draft	22	2	4.53	4	6.37	8	11.67	16745	NA	19	8	0	Complete	100	ITR (high-confidence)	0
k141_1147779_length_1222_cov_132.1156	lytic	low quality draft	4	0	0	0	0	1	0.51	1222	NA	4	1	0	Low-quality	0.31	HMM-based (lower-bound)	0
k141_114933_length_6005_cov_112.0000	lytic	low quality draft	13	0	0	0	0	1	0.42	6005	NA	13	1	0	Low-quality	2.77	HMM-based (lower-bound)	0
k141_1150957_length_1854_cov_10.0000	lytic	low quality draft	4	0	0	0	0	1	0.38	1854	NA	4	3	0	Low-quality	3.29	HMM-based (lower-bound)	0
k141_1153045_length_4774_cov_75.0000	lytic	low quality draft	6	2	4.18	1	8.06	4	30.09	4774	NA	6	3	0	Low-quality	10.52	AAI-based (high-confidence)	0
k141_1155657_length_2267_cov_263.2215	lytic	low quality draft	4	1	2.88	2	1.46	2	10.29	2267	NA	4	0	0	Low-quality	5.33	AAI-based (high-confidence)	0	no viral genes detected
k141_1155759_length_3897_cov_119.0000	lytic	low quality draft	11	1	0.25	1	2.7	2	11.73	3897	NA	11	1	0	Low-quality	8.36	AAI-based (high-confidence)	0
k141_1156598_length_4425_cov_560.0000	lytic	low quality draft	12	1	4.3	1	4.14	3	23.08	4425	NA	12	3	0	Low-quality	2.13	HMM-based (lower-bound)	0
k141_1157941_length_45826_cov_488.0281	lysogenic	low quality draft	67	10	11.77	23	43.99	21	103.2	45826	32182	67	22	6	Low-quality	46.38	HMM-based (lower-bound)	29.77
k141_1159199_length_5057_cov_48.0000	lytic	low quality draft	8	0	0	2	2	1	8.05	5057	NA	8	3	0	Low-quality	4.86	HMM-based (lower-bound)	0
k141_1159515_length_4272_cov_460.5144	lytic	low quality draft	5	1	1.75	2	4.74	5	12.19	4272	NA	5	4	0	Low-quality	8.22	AAI-based (high-confidence)	0
k141_1161276_length_2410_cov_642.0000	lytic	low quality draft	5	3	4.42	3	4.28	4	14.72	2410	NA	5	0	0	Not-determined	NA	NA	0	no viral genes detected
k141_116264_length_2487_cov_497.3653	lytic	low quality draft	6	0	0	1	0.42	1	1.36	2487	NA	6	1	0	Low-quality	3.79	HMM-based (lower-bound)	0
k141_1163861_length_1919_cov_854.0000	lytic	low quality draft	5	0	0	0	0	1	0.32	1919	NA	5	1	0	Low-quality	3.74	AAI-based (medium-confidence)	0
k141_116443_length_3211_cov_773.6013	lytic	low quality draft	5	1	3.31	0	0	2	20	3211	NA	5	2	0	Low-quality	1.46	HMM-based (lower-bound)	0
k141_1167103_length_2149_cov_1695.0000	lytic	low quality draft	4	0	0	0	0	1	5.22	2149	NA	4	1	0	Low-quality	0.17	HMM-based (lower-bound)	0
k141_1168670_length_1802_cov_162.0000	lytic	low quality draft	4	0	0	0	0	2	3.03	1802	NA	4	2	0	Low-quality	1.94	HMM-based (lower-bound)	0
k141_1168752_length_5372_cov_395.0000	lytic	low quality draft	7	1	1.09	7	7.53	5	18.24	5372	NA	7	4	0	Low-quality	11.79	AAI-based (high-confidence)	0
k141_1169943_length_2237_cov_1309.0000	lytic	low quality draft	4	0	0	2	1.34	2	13.98	2237	NA	4	4	0	Low-quality	4.45	AAI-based (medium-confidence)	0
k141_1170028_length_2217_cov_1296.2779	lytic	low quality draft	5	0	0	0	0	1	0.06	2217	NA	5	0	0	Low-quality	4.48	AAI-based (medium-confidence)	0	no viral genes detected
k141_1171087_length_3064_cov_372.0000	lytic	low quality draft	5	1	2.86	1	0.18	2	15.29	3064	NA	5	1	0	Low-quality	7.18	HMM-based (lower-bound)	0
k141_1171340_length_5009_cov_112.0000	lytic	low quality draft	7	1	1.39	1	2.56	1	10	5009	NA	7	0	0	Not-determined	NA	NA	0	no viral genes detected
k141_11721_length_2066_cov_1955.1086	lytic	low quality draft	4	0	0	1	0.01	1	1.3	2066	NA	4	0	0	Not-determined	NA	NA	0	no viral genes detected
k141_1172907_length_2579_cov_1217.4348	lytic	low quality draft	5	0	0	0	0	1	10	2579	NA	5	3	0	Low-quality	6.38	AAI-based (medium-confidence)	0
k141_117299_length_6287_cov_50.0000	lytic	low quality draft	13	2	1.44	1	1.74	6	17.68	6287	NA	13	4	0	Low-quality	14.73	AAI-based (medium-confidence)	0
k141_1173780_length_3723_cov_425.9358	lytic	low quality draft	10	2	8	2	8.77	3	30	3723	NA	9	4	0	Low-quality	7.38	AAI-based (medium-confidence)	0
k141_1174359_length_7788_cov_517.2073	lytic	low quality draft	7	1	2.77	3	4.68	5	30.41	7788	NA	7	5	0	Low-quality	5.2	AAI-based (medium-confidence)	0
k141_1174546_length_3940_cov_764.0000	lytic	low quality draft	4	0	0	4	3.21	2	1.04	3940	NA	4	4	0	Low-quality	9.2	AAI-based (high-confidence)	0
k141_117466_length_2091_cov_3005.4641	lytic	low quality draft	5	1	1.86	2	2.37	2	19.01	2091	NA	5	3	0	Low-quality	6.31	AAI-based (medium-confidence)	0
k141_1175208_length_4534_cov_448.0000	lytic	low quality draft	9	1	2.48	6	14.42	7	51.17	4534	NA	9	7	0	Low-quality	12.05	AAI-based (high-confidence)	0
k141_1175646_length_11818_cov_556.8894	lytic	low quality draft	12	1	0.19	1	1.86	8	9.47	11818	NA	12	7	1	Low-quality	4.89	AAI-based (medium-confidence)	0
k141_1176055_length_5524_cov_1057.9376	lytic	low quality draft	7	0	0	1	0.47	1	2.7	5524	NA	7	0	0	Not-determined	NA	NA	0	no viral genes detected
k141_117621_length_6892_cov_36.0000	lytic	low quality draft	8	1	0.01	1	0.09	2	2.42	6892	NA	8	1	1	Low-quality	4.43	HMM-based (lower-bound)	0
k141_1176649_length_1222_cov_1736.0000	lytic	low quality draft	4	0	0	0	0	1	2.21	1222	NA	4	1	0	Low-quality	1.1	HMM-based (lower-bound)	0
k141_117836_length_1542_cov_485.9015	lytic	low quality draft	4	0	0	0	0	2	2.49	1542	NA	4	1	0	Low-quality	1.25	AAI-based (medium-confidence)	0
k141_1179045_length_5813_cov_1736.0303	lytic	low quality draft	7	0	0	1	0.93	3	16.86	5813	NA	7	5	0	Low-quality	11.64	AAI-based (medium-confidence)	0
k141_117920_length_2598_cov_1079.3081	lytic	low quality draft	8	1	0.07	1	0.06	1	2.29	2598	NA	8	1	0	Low-quality	2.56	HMM-based (lower-bound)	0
k141_1179739_length_2649_cov_813.0000	lytic	low quality draft	8	1	2.79	1	1.61	3	12.64	2649	NA	8	1	0	Low-quality	1.44	HMM-based (lower-bound)	0
k141_1180102_length_2219_cov_783.0000	lytic	low quality draft	5	1	0.69	1	0.93	2	5.29	2219	NA	5	2	0	Low-quality	5.17	AAI-based (high-confidence)	0
k141_1181557_length_1520_cov_322.2640	lytic	low quality draft	4	0	0	1	1	3	1.04	1520	NA	4	2	0	Low-quality	3.17	AAI-based (high-confidence)	0
k141_118237_length_18388_cov_234.0000	lytic	medium quality draft	21	0	0	8	11.26	9	22.03	18388	NA	21	12	0	Low-quality	24.54	HMM-based (lower-bound)	0
k141_1182724_length_9203_cov_222.6777	lytic	low quality draft	10	2	5.43	8	14.54	8	45.22	9203	NA	13	10	0	Low-quality	24.88	AAI-based (high-confidence)	0
k141_118303_length_1841_cov_592.1406	lytic	low quality draft	4	1	0.05	1	0.02	2	0.21	1841	NA	4	0	0	Not-determined	NA	NA	0	no viral genes detected
k141_1183087_length_1500_cov_965.0000	lytic	low quality draft	4	1	2.79	1	2.5	2	20	1500	NA	4	1	0	Low-quality	3.34	AAI-based (high-confidence)	0
k141_1183531_length_1977_cov_9.0000	lytic	low quality draft	4	0	0	0	0	3	1.43	1977	NA	4	0	0	Not-determined	NA	NA	0	no viral genes detected
k141_1184782_length_5965_cov_1569.0000	lytic	low quality draft	7	0	0	2	2.25	6	26.91	5965	NA	7	7	0	Low-quality	6.31	HMM-based (lower-bound)	0
k141_1184837_length_1629_cov_17.0000	lytic	low quality draft	4	0	0	1	4.15	1	2.09	1629	NA	4	1	0	Low-quality	3.59	HMM-based (lower-bound)	0
k141_118515_length_4001_cov_487.0241	lytic	low quality draft	7	1	1.75	3	4.25	4	11.07	4001	NA	7	3	0	Low-quality	9.15	AAI-based (medium-confidence)	0
k141_1186475_length_2017_cov_14.0000	lytic	low quality draft	5	0	0	0	0	1	0.36	2017	NA	5	0	0	Not-determined	NA	NA	0	no viral genes detected
k141_11866_length_5744_cov_945.3379	lytic	low quality draft	6	0	0	0	0	2	6.33	5744	NA	6	1	0	Low-quality	5.1	HMM-based (lower-bound)	0
k141_1186612_length_14702_cov_111.0000	lytic	low quality draft	20	3	3.06	3	1.29	10	54.2	14702	NA	18	9	0	Low-quality	3.03	AAI-based (medium-confidence)	0
k141_1192600_length_1751_cov_2159.3205	lytic	low quality draft	4	0	0	0	0	1	2.73	1751	NA	3	2	0	Low-quality	0.93	HMM-based (lower-bound)	0
k141_1192646_length_1303_cov_131.0000	lytic	low quality draft	5	0	0	1	1.34	1	3.72	1303	NA	5	0	0	Not-determined	NA	NA	0	no viral genes detected
k141_1193182_length_4781_cov_862.1138	lytic	low quality draft	14	0	0	3	3	5	3.78	4781	NA	14	1	0	Low-quality	4.3	HMM-based (lower-bound)	0
k141_119376_length_6013_cov_187.0000	lytic	low quality draft	5	1	0.09	1	1.86	2	1.33	6013	NA	5	2	0	Low-quality	1.3	AAI-based (medium-confidence)	0
k141_1193999_length_10720_cov_395.0000	lytic	low quality draft	19	5	7.66	16	22.79	17	58.48	10720	NA	19	17	0	Low-quality	28.62	AAI-based (high-confidence)	0
k141_119494_length_28060_cov_203.7228	lytic	medium quality draft	34	1	1.2	23	26.98	26	55.67	28060	NA	34	21	0	High-quality	94.01	AAI-based (high-confidence)	0
k141_119496_length_1865_cov_811.7541	lytic	low quality draft	5	1	0.69	1	0.93	2	7.06	1865	NA	5	2	0	Low-quality	4.28	AAI-based (medium-confidence)	0
k141_1195827_length_27872_cov_975.6228_fragment_1	lysogenic	low quality draft	9	0	0	0	0	3	3.05	3143	NA	9	3	0	Low-quality	2.91	AAI-based (medium-confidence)	0
k141_1196372_length_2324_cov_48.0000	lytic	low quality draft	5	1	2.36	1	1	2	3.19	2324	NA	5	2	0	Low-quality	4.29	AAI-based (medium-confidence)	0
k141_119701_length_5697_cov_22.0000	lytic	low quality draft	5	1	1.08	2	2.85	3	10.41	5697	NA	5	3	0	Low-quality	12.24	AAI-based (medium-confidence)	0
k141_119738_length_2921_cov_1027.5155	lytic	low quality draft	4	0	0	1	0.39	1	7.34	2921	NA	4	1	0	Low-quality	4.58	HMM-based (lower-bound)	0
k141_1199444_length_3437_cov_818.0000	lytic	low quality draft	5	0	0	3	4	4	12.29	3437	NA	5	4	0	Low-quality	10.71	AAI-based (high-confidence)	0
k141_1200387_length_5073_cov_195.0000	lytic	low quality draft	7	1	0	1	1.99	3	19.37	5073	NA	7	3	0	Low-quality	11.6	AAI-based (medium-confidence)	0
k141_1201011_length_5299_cov_825.0000	lytic	low quality draft	9	1	1.37	2	0.94	4	12.18	5299	NA	10	1	0	Low-quality	1.19	HMM-based (lower-bound)	0
k141_1202113_length_2254_cov_1904.0000	lytic	low quality draft	5	0	0	0	0	1	0.07	2254	NA	5	0	0	Not-determined	NA	NA	0	no viral genes detected
k141_1205868_length_1493_cov_187.0000	lytic	low quality draft	4	0	0	0	0	1	0.2	1493	NA	4	0	0	Low-quality	1.16	AAI-based (medium-confidence)	0	no viral genes detected
k141_1206478_length_1303_cov_51.0000	lytic	low quality draft	4	0	0	0	0	1	0.32	1303	NA	4	0	0	Not-determined	NA	NA	0	no viral genes detected
k141_1206822_length_3438_cov_727.0000	lytic	low quality draft	4	0	0	1	1.68	2	10.44	3438	NA	4	1	0	Low-quality	2.31	HMM-based (lower-bound)	0
k141_1207080_length_2296_cov_398.0000	lytic	low quality draft	4	0	0	0	0	1	6.98	2296	NA	4	1	0	Low-quality	1.63	HMM-based (lower-bound)	0
k141_1208143_length_15789_cov_111.0459	lytic	low quality draft	24	5	1.72	5	2.47	6	11.71	15789	NA	23	3	2	Low-quality	5.21	HMM-based (lower-bound)	0
k141_1208310_length_7677_cov_1502.1328	lysogenic	low quality draft	5	1	7	3	1.4	2	10.85	7677	NA	5	0	1	Not-determined	NA	NA	0	no viral genes detected
k141_1211265_length_26035_cov_761.1049	lytic	low quality draft	44	9	16.98	15	53.56	24	130.16	26035	NA	44	20	1	Medium-quality	64.34	AAI-based (medium-confidence)	0
k141_1211841_length_1090_cov_1166.0000	lytic	low quality draft	4	0	0	0	0	1	0.59	1090	NA	4	0	0	Low-quality	2.53	AAI-based (medium-confidence)	0	no viral genes detected
k141_1212035_length_1106_cov_203.0000	lytic	low quality draft	4	0	0	0	0	1	2.29	1106	NA	4	1	0	Low-quality	2.53	AAI-based (medium-confidence)	0
k141_12128_length_3937_cov_83.0000	lytic	low quality draft	10	0	0	3	0.69	4	12.28	3937	NA	10	3	0	Low-quality	6.21	HMM-based (lower-bound)	0
k141_1212943_length_3956_cov_1190.3143	lytic	low quality draft	5	0	0	1	0.42	1	0.56	3956	NA	5	0	0	Not-determined	NA	NA	0	no viral genes detected
k141_121401_length_8328_cov_239.0000	lytic	low quality draft	10	2	5.72	1	0.03	3	12.47	8328	NA	10	1	0	Low-quality	7.39	HMM-based (lower-bound)	0
k141_1214399_length_1679_cov_1680.0000	lytic	low quality draft	5	0	0	1	0.35	1	4.29	1679	NA	5	0	0	Not-determined	NA	NA	0	no viral genes detected
k141_121443_length_1206_cov_1255.4282	lytic	low quality draft	4	0	0	0	0	1	3.08	1206	NA	4	1	0	Low-quality	1.29	AAI-based (medium-confidence)	0
k141_1214493_length_3303_cov_155.0000	lytic	low quality draft	7	1	2.08	1	0.25	2	16.13	3303	NA	7	1	0	Low-quality	6	AAI-based (medium-confidence)	0
k141_1215329_length_2410_cov_22.0000	lytic	low quality draft	4	0	0	1	0.02	1	2.21	2410	NA	4	0	0	Not-determined	NA	NA	0	no viral genes detected
k141_1216094_length_2971_cov_91.0053	lytic	low quality draft	5	1	0.89	2	1.36	2	9.08	2971	NA	5	3	0	Low-quality	6.22	AAI-based (medium-confidence)	0
k141_1218652_length_1996_cov_618.0000	lytic	low quality draft	4	0	0	1	1.25	3	10.24	1996	NA	4	3	0	Low-quality	3.44	HMM-based (lower-bound)	0
k141_1218735_length_32860_cov_224.5009	lysogenic	medium quality draft	47	4	6.87	8	21.98	19	93.9	32860	NA	47	14	1	High-quality	90.04	AAI-based (medium-confidence)	0
k141_1218951_length_2676_cov_949.0000	lytic	low quality draft	4	0	0	1	0.01	1	3.08	2676	NA	4	1	0	Low-quality	3.19	AAI-based (medium-confidence)	0
k141_1219061_length_1242_cov_1079.0000	lytic	low quality draft	4	0	0	1	0.28	1	0.14	1242	NA	4	0	0	Not-determined	NA	NA	0	no viral genes detected
k141_1219188_length_2476_cov_658.7276	lytic	low quality draft	6	0	0	0	0	2	0.59	2476	NA	6	1	0	Low-quality	0.62	HMM-based (lower-bound)	0
k141_121995_length_2196_cov_42.0000	lytic	low quality draft	6	2	0.01	1	0.02	3	7.56	2196	2018	6	1	1	Low-quality	1.12	HMM-based (lower-bound)	8.11
k141_1221048_length_4422_cov_1387.6440	lytic	low quality draft	5	0	0	2	3.81	3	16.86	4422	NA	5	4	0	Low-quality	7.84	AAI-based (high-confidence)	0
k141_1221327_length_5568_cov_1182.1911	lytic	low quality draft	11	0	0	2	1.98	1	6.82	5568	NA	11	1	0	Low-quality	1.47	HMM-based (lower-bound)	0
k141_1221942_length_2868_cov_17.0000	lytic	low quality draft	4	1	0.02	2	0.92	2	3.18	2868	NA	4	0	1	Not-determined	NA	NA	0	no viral genes detected
k141_122242_length_5601_cov_1524.1148	lytic	low quality draft	11	1	2.36	3	6.8	4	15.13	5601	NA	11	3	0	Low-quality	9.36	HMM-based (lower-bound)	0
k141_1226132_length_2490_cov_887.0000	lytic	low quality draft	5	0	0	0	0	2	6.78	2490	NA	5	2	0	Low-quality	1.73	HMM-based (lower-bound)	0
k141_1226792_length_4650_cov_52.0000	lytic	low quality draft	6	1	2.77	0	0	1	10	4650	NA	6	0	0	Not-determined	NA	NA	0	no viral genes detected
k141_1226845_length_1616_cov_1603.5553	lytic	low quality draft	4	1	0.69	2	3.47	2	13.35	1616	NA	4	2	0	Low-quality	2.1	HMM-based (lower-bound)	0
k141_1226935_length_2730_cov_34.0000	lytic	low quality draft	5	1	0.84	2	1.03	2	2.67	2730	NA	5	1	0	Low-quality	38.44	AAI-based (high-confidence)	0
k141_1226940_length_3744_cov_222.0000	lytic	low quality draft	5	2	0.68	1	0.03	3	6.16	3744	NA	5	0	1	Not-determined	NA	NA	0	no viral genes detected
k141_1227031_length_1822_cov_1498.0000	lytic	low quality draft	6	0	0	1	0.55	2	3.07	1822	NA	6	1	0	Low-quality	2.88	HMM-based (lower-bound)	0
k141_1227132_length_2179_cov_386.0000	lytic	low quality draft	5	2	2.15	3	4.75	3	12.11	2179	NA	5	2	0	Low-quality	4.55	AAI-based (medium-confidence)	0
k141_1227199_length_5176_cov_513.0000	lytic	low quality draft	8	0	0	1	0.93	7	49.21	5176	NA	8	5	0	Low-quality	9.99	AAI-based (medium-confidence)	0
k141_1227395_length_1707_cov_239.0000	lytic	low quality draft	4	0	0	0	0	1	0.6	1707	NA	4	0	0	Low-quality	3.67	AAI-based (high-confidence)	0	no viral genes detected
k141_1227941_length_1999_cov_245.0000	lytic	low quality draft	4	0	0	1	2.88	2	19.01	1999	NA	4	4	0	Low-quality	4.07	AAI-based (medium-confidence)	0
k141_1227994_length_6132_cov_126.3383	lytic	low quality draft	9	1	0.06	0	0	1	0.1	6132	NA	9	0	0	Not-determined	NA	NA	0	no viral genes detected
k141_1228215_length_1722_cov_956.0000	lytic	low quality draft	4	0	0	0	0	1	3.08	1722	NA	4	1	0	Low-quality	4.02	AAI-based (high-confidence)	0
k141_1228392_length_2843_cov_130.0000	lytic	low quality draft	4	0	0	0	0	3	7.15	2843	NA	4	2	0	Low-quality	0.61	HMM-based (lower-bound)	0
k141_1228739_length_2646_cov_188.0000	lytic	low quality draft	7	0	0	0	0	3	5.27	2646	NA	7	3	0	Low-quality	3.93	HMM-based (lower-bound)	0
k141_1228929_length_1694_cov_54.0000	lytic	low quality draft	4	0	0	1	2.7	2	11.96	1694	NA	4	2	0	Low-quality	3.25	AAI-based (medium-confidence)	0
k141_1228954_length_31279_cov_132.0000	lytic	high quality draft	49	4	11.2	22	24.18	32	85.08	31279	NA	46	31	0	Medium-quality	76.95	AAI-based (high-confidence)	0
k141_1228986_length_14949_cov_161.4194	lytic	low quality draft	13	2	0.96	1	1.22	4	22.16	14949	NA	12	2	0	Low-quality	6.51	AAI-based (medium-confidence)	0
k141_1229212_length_23252_cov_241.1035	lysogenic	low quality draft	33	6	15.3	11	17.82	7	16.48	23252	NA	33	3	1	Medium-quality	50.63	AAI-based (medium-confidence)	0
k141_1229385_length_1934_cov_762.6313	lytic	low quality draft	5	0	0	0	0	1	3.08	1934	NA	5	1	0	Low-quality	3.96	AAI-based (medium-confidence)	0
k141_1229732_length_2296_cov_78.0000	lytic	low quality draft	4	1	1.03	2	3.49	3	3.42	2296	NA	4	2	0	Low-quality	3.01	HMM-based (lower-bound)	0
k141_1229999_length_27303_cov_28.0000	lytic	low quality draft	18	0	0	0	0	10	19.32	27303	NA	18	10	0	Low-quality	10.95	AAI-based (medium-confidence)	0
k141_1230045_length_13755_cov_1146.3410	lytic	low quality draft	20	2	0.4	3	3.38	4	12.6	13755	NA	20	7	1	Low-quality	18.67	HMM-based (lower-bound)	0
k141_1230251_length_1080_cov_5.0000	lytic	low quality draft	4	0	0	0	0	1	0.24	1080	NA	4	0	0	Not-determined	NA	NA	0	no viral genes detected
k141_1230567_length_4976_cov_2420.0000	lytic	low quality draft	5	0	0	0	0	2	2.06	4976	NA	5	2	0	Low-quality	1.72	HMM-based (lower-bound)	0
k141_123125_length_2276_cov_110.0000	lytic	low quality draft	6	0	0	2	7.81	3	18.45	2276	NA	6	2	0	Low-quality	4.49	AAI-based (high-confidence)	0
k141_1231475_length_2050_cov_584.0000	lytic	low quality draft	5	0	0	2	1.27	3	10.59	2050	NA	5	4	0	Low-quality	4.42	HMM-based (lower-bound)	0
k141_1231527_length_10827_cov_1790.6182	lytic	low quality draft	17	3	4.37	4	4.05	7	41.96	10827	NA	17	5	0	Low-quality	16.59	AAI-based (medium-confidence)	0
k141_1232248_length_2625_cov_121.0000	lytic	low quality draft	4	0	0	1	2.88	1	10	2625	NA	4	2	0	Low-quality	4.94	AAI-based (high-confidence)	0
k141_1232469_length_10322_cov_149.0000	lytic	low quality draft	13	2	5.15	2	5.29	7	21.65	10322	NA	12	5	1	Low-quality	2.58	AAI-based (medium-confidence)	0
k141_1232551_length_8191_cov_1246.1793	lytic	low quality draft	12	1	0.93	1	0.91	4	6.99	8191	NA	12	1	0	Low-quality	5.53	HMM-based (lower-bound)	0
k141_1232896_length_1281_cov_20.0000	lytic	low quality draft	4	0	0	0	0	1	0.32	1281	NA	4	0	0	Not-determined	NA	NA	0	no viral genes detected
k141_1233629_length_1021_cov_651.0000	lytic	low quality draft	4	0	0	1	2.75	1	6.75	1021	NA	4	1	0	Low-quality	1.26	AAI-based (high-confidence)	0
k141_1234364_length_3442_cov_40.0000	lytic	low quality draft	7	0	0	0	0	1	4.23	3442	NA	7	1	0	Low-quality	5.12	AAI-based (medium-confidence)	0
k141_1234450_length_2046_cov_1540.2693	lytic	low quality draft	4	1	4.3	1	4.14	2	17.56	2046	NA	5	2	0	Low-quality	1.68	AAI-based (medium-confidence)	0
k141_1235409_length_8217_cov_21.0000	lytic	low quality draft	6	1	0.18	1	1.24	3	12.82	8217	NA	6	0	0	Not-determined	NA	NA	0	no viral genes detected
k141_1235994_length_3138_cov_1300.1859	lytic	low quality draft	9	0	0	0	0	1	1.1	3138	NA	9	1	0	Low-quality	4.45	HMM-based (lower-bound)	0
k141_1236007_length_6133_cov_517.0265	lytic	low quality draft	12	1	0.17	2	2.19	2	10.92	6133	NA	11	1	1	Low-quality	3.02	HMM-based (lower-bound)	0
k141_1236309_length_2639_cov_1205.9023	lytic	low quality draft	4	0	0	0	0	1	1	2639	NA	4	1	0	Low-quality	1.78	HMM-based (lower-bound)	0
k141_123647_length_2710_cov_560.0000	lytic	low quality draft	5	0	0	1	0.35	1	4.29	2710	NA	5	0	0	Not-determined	NA	NA	0	no viral genes detected
k141_1236859_length_5595_cov_1931.9360	lytic	low quality draft	9	1	1.2	4	5.32	5	27.89	5595	NA	9	6	0	Low-quality	10.63	AAI-based (medium-confidence)	0
k141_123709_length_7768_cov_268.0000	lytic	low quality draft	10	2	3.56	5	7.43	3	23.18	7768	NA	10	4	0	Low-quality	16.83	AAI-based (medium-confidence)	0
k141_1238196_length_4821_cov_31.0000	lytic	low quality draft	9	1	0.57	2	0.15	3	3.2	4821	NA	9	0	0	Not-determined	NA	NA	0	no viral genes detected
k141_1238762_length_4726_cov_697.8358	lytic	low quality draft	9	3	0.21	3	0.25	3	1.7	4726	NA	9	1	2	Low-quality	1.39	HMM-based (lower-bound)	0
k141_12389_length_3372_cov_65.0000	lytic	low quality draft	7	0	0	0	0	1	10	3372	NA	7	0	0	Not-determined	NA	NA	0	no viral genes detected
k141_1239108_length_1785_cov_45.0000	lytic	low quality draft	4	0	0	0	0	1	0.73	1785	NA	4	1	0	Low-quality	2.39	AAI-based (medium-confidence)	0
k141_1239710_length_1328_cov_111.0000	lytic	low quality draft	4	0	0	0	0	1	10	1328	NA	4	1	0	Low-quality	3.15	HMM-based (lower-bound)	0
k141_1240098_length_5331_cov_1092.2383	lytic	low quality draft	5	1	0.14	1	0.12	2	2.42	5331	NA	5	0	1	Not-determined	NA	NA	0	no viral genes detected
k141_1240814_length_2410_cov_53.0000	lysogenic	low quality draft	4	1	4.34	1	9.33	3	10.95	2410	NA	4	2	0	Low-quality	2.57	HMM-based (lower-bound)	0
k141_1240840_length_2638_cov_847.9604	lytic	low quality draft	5	0	0	0	0	1	2.95	2638	NA	5	1	0	Low-quality	1.63	HMM-based (lower-bound)	0
k141_1241377_length_1353_cov_23.0000	lytic	low quality draft	4	2	4.81	2	2.26	3	11.04	1353	NA	4	2	0	Low-quality	3.1	AAI-based (high-confidence)	0
k141_1241883_length_6894_cov_217.5180	lytic	low quality draft	7	0	0	0	0	1	0.41	6894	NA	8	0	1	Not-determined	NA	NA	0	no viral genes detected
k141_1242958_length_2263_cov_13.0000	lytic	low quality draft	5	0	0	0	0	2	2.64	2263	NA	5	2	0	Low-quality	1.21	HMM-based (lower-bound)	0
k141_1243995_length_4972_cov_475.6239	lytic	low quality draft	7	0	0	0	0	6	14.34	4972	NA	7	5	0	Low-quality	10.62	AAI-based (high-confidence)	0
k141_1244813_length_7319_cov_160.0000	lytic	low quality draft	15	0	0	0	0	5	18.18	7319	NA	15	5	0	Low-quality	14.99	AAI-based (high-confidence)	0
k141_1245204_length_3784_cov_227.0000	lytic	low quality draft	4	0	0	0	0	4	6.03	3784	NA	4	3	0	Low-quality	8.69	AAI-based (high-confidence)	0
k141_1245303_length_3633_cov_9.0000	lytic	low quality draft	5	0	0	1	2.29	4	12.51	3633	NA	5	4	0	Low-quality	7.74	AAI-based (high-confidence)	0
k141_1245415_length_5141_cov_281.0000	lytic	low quality draft	8	0	0	3	3	3	5.77	5141	NA	8	1	0	Low-quality	12.8	HMM-based (lower-bound)	0
k141_1245521_length_3319_cov_16.0000	lytic	low quality draft	7	0	0	1	0.18	1	3.4	3319	NA	7	2	0	Low-quality	4.66	HMM-based (lower-bound)	0
k141_1246253_length_6001_cov_407.0000	lysogenic	low quality draft	9	1	2.87	2	15.32	2	20	6001	NA	9	0	0	Not-determined	NA	NA	0	no viral genes detected
k141_1246469_length_3637_cov_360.0000	lytic	low quality draft	8	1	1.33	0	0	4	19.4	3637	NA	8	3	0	Low-quality	1.59	HMM-based (lower-bound)	0
k141_1246756_length_6145_cov_149.0242	lytic	low quality draft	12	3	5.01	4	5.92	7	34.12	6145	NA	12	2	0	Low-quality	8.11	HMM-based (lower-bound)	0
k141_1246781_length_5544_cov_223.8353	lytic	low quality draft	7	2	1.13	2	0.18	2	20	5544	NA	7	0	2	Not-determined	NA	NA	0	no viral genes detected
k141_1247847_length_1044_cov_47.0000	lytic	low quality draft	4	1	2.24	1	2.02	2	8.41	1044	NA	3	2	0	Low-quality	1.47	AAI-based (high-confidence)	0
k141_1248025_length_1253_cov_663.0000	lytic	low quality draft	5	0	0	1	0.62	1	2.09	1253	NA	5	1	0	Low-quality	2.5	AAI-based (medium-confidence)	0
k141_1248328_length_3118_cov_806.0000	lytic	low quality draft	6	0	0	0	0	1	6.28	3118	NA	6	1	0	Low-quality	3.52	HMM-based (lower-bound)	0
k141_1248805_length_1944_cov_95.0383	lysogenic	low quality draft	4	1	2.87	1	9.33	2	10.33	1944	NA	4	2	0	Low-quality	6	AAI-based (medium-confidence)	0
k141_1248913_length_3710_cov_89.0392	lysogenic	low quality draft	6	2	8	3	12.01	2	17.43	3710	NA	6	1	0	Low-quality	5.52	AAI-based (medium-confidence)	0
k141_1249305_length_5122_cov_210.4935	lytic	low quality draft	9	3	7.19	5	5.9	6	22.01	5122	NA	9	6	0	Low-quality	11.65	AAI-based (high-confidence)	0
k141_1249388_length_2764_cov_70.0000	lytic	low quality draft	4	0	0	2	1.3	1	0.9	2764	NA	4	1	0	Low-quality	7.33	HMM-based (lower-bound)	0
k141_1250295_length_3877_cov_450.0000	lytic	low quality draft	12	0	0	1	1.34	1	3.72	3877	NA	12	0	0	Not-determined	NA	NA	0	no viral genes detected
k141_1250624_length_3503_cov_1076.0000	lytic	low quality draft	9	0	0	0	0	1	0.07	3503	NA	9	0	0	Not-determined	NA	NA	0	no viral genes detected
k141_1250642_length_25091_cov_33.0000	lytic	low quality draft	33	10	25.34	11	33.53	20	110.36	25091	NA	33	13	1	Low-quality	42.74	AAI-based (medium-confidence)	0
k141_1250709_length_2502_cov_257.0000	lytic	low quality draft	5	1	3.29	3	5.37	3	6.49	2502	NA	5	4	0	Low-quality	8.26	AAI-based (high-confidence)	0
k141_1250800_length_2267_cov_102.0000	lytic	low quality draft	4	1	1.76	2	3.46	3	30	2267	NA	4	3	0	Low-quality	4.92	AAI-based (high-confidence)	0
k141_1251074_length_4389_cov_77.0000	lytic	low quality draft	6	0	0	4	5.31	3	19.64	4389	NA	6	4	0	Low-quality	10.29	AAI-based (medium-confidence)	0
k141_1251110_length_16647_cov_49.3291	lytic	medium quality draft	19	4	3.59	4	4.48	13	41.88	16647	NA	19	12	0	Low-quality	3.85	AAI-based (medium-confidence)	0
k141_1251645_length_1507_cov_351.0000	lytic	low quality draft	4	1	4.48	2	4.03	2	12.29	1507	NA	3	2	0	Low-quality	3.17	AAI-based (medium-confidence)	0
k141_1252062_length_3631_cov_183.0000	lytic	low quality draft	4	2	3.39	4	7.37	4	11.97	3631	NA	4	3	0	Low-quality	9.01	AAI-based (medium-confidence)	0
k141_1252159_length_3277_cov_647.0000	lytic	low quality draft	5	0	0	0	0	1	1.23	3277	NA	4	2	0	Low-quality	5.12	HMM-based (lower-bound)	0
k141_1252347_length_3930_cov_1093.0288	lytic	low quality draft	5	0	0	0	0	1	2.74	3930	NA	5	0	0	Not-determined	NA	NA	0	no viral genes detected
k141_1252502_length_4322_cov_214.0000	lytic	low quality draft	4	2	2.18	2	2.72	3	20.16	4322	NA	4	2	0	Low-quality	8.32	AAI-based (high-confidence)	0
k141_1252693_length_6660_cov_50.0000	lytic	low quality draft	7	1	1.49	2	3.74	6	19.2	6660	NA	7	6	0	Low-quality	14.43	AAI-based (high-confidence)	0
k141_1252768_length_3058_cov_608.0000	lytic	low quality draft	7	0	0	0	0	1	10	3058	NA	7	0	0	Low-quality	7.14	AAI-based (high-confidence)	0	no viral genes detected
k141_1253690_length_2099_cov_38.0000	lytic	low quality draft	5	1	0.26	2	0.42	2	2.25	2099	NA	5	2	0	Low-quality	6.01	AAI-based (high-confidence)	0
k141_1253908_length_1555_cov_227.8798	lytic	low quality draft	4	0	0	1	0.45	2	3.12	1555	NA	4	2	0	Low-quality	0.82	HMM-based (lower-bound)	0
k141_1254898_length_1794_cov_115.6515	lytic	low quality draft	4	1	0.02	1	1	3	6.21	1794	NA	4	1	0	Low-quality	1.03	HMM-based (lower-bound)	0
k141_1255006_length_5575_cov_18.0000	lytic	low quality draft	6	0	0	3	5.63	6	18.87	5575	NA	6	6	0	Low-quality	15.66	AAI-based (high-confidence)	0
k141_1255388_length_10576_cov_1301.0000	lytic	complete circular	16	2	1.85	3	4.81	5	15.04	10576	NA	16	3	0	Low-quality	17.72	HMM-based (lower-bound)	0
k141_1255469_length_12938_cov_92.0000	lytic	low quality draft	16	3	10.48	3	9.72	9	48.54	12938	NA	16	1	0	Low-quality	7.22	HMM-based (lower-bound)	0
k141_1255895_length_6203_cov_457.9279	lytic	low quality draft	7	2	8.52	1	5.28	4	20.66	6203	NA	6	3	0	Low-quality	1.62	AAI-based (medium-confidence)	0
k141_1256013_length_1660_cov_1791.0000	lytic	low quality draft	4	0	0	1	0.25	1	6.13	1660	NA	4	0	0	Not-determined	NA	NA	0	no viral genes detected
k141_1256448_length_5915_cov_24.0000	lytic	low quality draft	5	0	0	2	2	4	13.93	5915	NA	5	3	0	Low-quality	15.17	AAI-based (medium-confidence)	0
k141_1256639_length_3893_cov_347.6341	lytic	low quality draft	7	1	0.43	1	0.63	2	12.82	3893	NA	7	1	0	Low-quality	9.79	AAI-based (medium-confidence)	0
k141_1256849_length_2163_cov_85.0000	lytic	low quality draft	4	1	2.08	2	8.7	2	17.43	2163	NA	4	2	0	Low-quality	5.2	AAI-based (high-confidence)	0
k141_1257067_length_11358_cov_447.0000	lysogenic	low quality draft	12	1	7	1	9.33	3	17.28	11358	NA	12	2	0	Low-quality	16.26	HMM-based (lower-bound)	0
k141_1257295_length_1374_cov_12.0000	lytic	low quality draft	5	0	0	0	0	2	1.28	1374	NA	5	1	0	Low-quality	3.24	AAI-based (medium-confidence)	0
k141_1257683_length_4840_cov_550.2098	lytic	low quality draft	7	1	0.06	1	0.06	3	10.74	4840	2078	7	1	1	Low-quality	3.45	AAI-based (high-confidence)	57.07
k141_1258239_length_2333_cov_231.0000	lytic	low quality draft	6	0	0	0	0	1	0.38	2333	NA	6	1	0	Low-quality	4.35	AAI-based (medium-confidence)	0
k141_1258848_length_4894_cov_1158.3215	lytic	low quality draft	13	0	0	1	1	4	16.66	4894	NA	13	4	0	Low-quality	9.53	AAI-based (medium-confidence)	0
k141_1258850_length_1686_cov_143.0000	lytic	low quality draft	6	0	0	1	0.03	2	10.59	1686	NA	6	1	0	Low-quality	2.56	HMM-based (lower-bound)	0
k141_1259228_length_3318_cov_752.4193	lytic	low quality draft	5	0	0	1	1	5	27.45	3318	NA	5	5	0	Low-quality	5.15	HMM-based (lower-bound)	0
k141_126060_length_11400_cov_412.7581	lytic	low quality draft	9	0	0	0	0	4	10.38	11400	NA	9	4	0	Low-quality	26.28	AAI-based (high-confidence)	0
k141_1261044_length_2783_cov_361.0000	lytic	low quality draft	4	2	0.72	0	0	3	10.53	2783	1201	4	1	1	Low-quality	0.46	HMM-based (lower-bound)	56.85
k141_1261175_length_3484_cov_29.0000	lytic	low quality draft	6	0	0	1	0.01	2	0.25	3484	NA	6	0	0	Not-determined	NA	NA	0	no viral genes detected
k141_1261470_length_2268_cov_62.0000	lytic	low quality draft	6	0	0	1	1	1	2.25	2268	NA	6	1	0	Low-quality	5.07	AAI-based (medium-confidence)	0
k141_1262863_length_4313_cov_969.0000	lytic	low quality draft	5	0	0	1	2.87	1	10	4313	NA	5	1	0	Low-quality	10.91	AAI-based (medium-confidence)	0
k141_1263640_length_3224_cov_780.0000	lytic	low quality draft	5	0	0	0	0	1	0.07	3224	NA	5	0	0	Low-quality	6.18	AAI-based (medium-confidence)	0	no viral genes detected
k141_1263979_length_4583_cov_1367.0000	lytic	low quality draft	8	0	0	1	2.88	1	10	4583	NA	8	3	0	Low-quality	8.63	AAI-based (medium-confidence)	0
k141_1264809_length_4952_cov_10.0000	lytic	low quality draft	10	2	6.74	2	4.42	4	16.9	4952	NA	10	3	0	Low-quality	5.58	HMM-based (lower-bound)	0
k141_1264865_length_5528_cov_5256.9428	lytic	complete circular	5	0	0	0	0	1	0.3	5528	NA	5	1	0	Low-quality	1.19	HMM-based (lower-bound)	0	low-confidence DTR
k141_1265881_length_10336_cov_50.0000	lytic	low quality draft	19	3	1.81	2	2.3	3	20.2	10336	NA	19	0	0	Not-determined	NA	NA	0	no viral genes detected
k141_1265928_length_9081_cov_849.5655	lytic	low quality draft	11	2	2.63	5	13.03	4	19.36	9081	NA	11	4	0	Low-quality	19.74	AAI-based (medium-confidence)	0
k141_1266847_length_3252_cov_1095.8480	lytic	low quality draft	5	0	0	3	4.31	2	10.63	3252	NA	5	3	0	Low-quality	7.27	AAI-based (medium-confidence)	0
k141_1267278_length_9092_cov_45.0000	lysogenic	low quality draft	15	4	9.23	5	12.61	5	27.41	9092	NA	15	3	0	Low-quality	12.85	HMM-based (lower-bound)	0
k141_126845_length_30904_cov_1124.6473	lytic	complete circular	37	2	7.34	1	0.27	8	46.24	30904	NA	37	11	0	Low-quality	47.82	HMM-based (lower-bound)	0	low-confidence DTR
k141_126854_length_11551_cov_90.0000	lytic	low quality draft	12	1	3.31	2	0.51	7	9.48	11551	NA	12	6	0	Low-quality	26.95	AAI-based (high-confidence)	0
k141_126865_length_1509_cov_1017.0000	lytic	low quality draft	4	0	0	1	1.25	3	9.48	1509	NA	4	4	0	Low-quality	4.43	AAI-based (high-confidence)	0
k141_1268731_length_24758_cov_85.8066	lytic	low quality draft	26	2	6.74	14	25.45	18	60.08	24758	NA	26	21	0	Medium-quality	64.89	AAI-based (medium-confidence)	0
k141_1269060_length_18575_cov_450.1523	lytic	low quality draft	26	6	6.49	7	7.15	13	46.97	18575	NA	27	5	0	Low-quality	4.41	AAI-based (medium-confidence)	0
k141_1269173_length_7494_cov_19.0000	lytic	low quality draft	12	0	0	1	1.58	3	12.4	7494	NA	12	2	0	Low-quality	11.16	HMM-based (lower-bound)	0
k141_1269496_length_4786_cov_151.7621	lytic	low quality draft	4	0	0	2	0.16	3	1.66	4786	NA	4	1	0	Low-quality	2.65	HMM-based (lower-bound)	0
k141_1270149_length_1987_cov_18.0000	lytic	low quality draft	5	0	0	0	0	1	0.11	1987	NA	5	0	0	Not-determined	NA	NA	0	no viral genes detected
k141_1270778_length_5159_cov_935.7104	lytic	low quality draft	14	0	0	2	1.47	6	7.69	5159	NA	13	3	0	Low-quality	1.34	HMM-based (lower-bound)	0
k141_1270787_length_1991_cov_9.0000	lytic	low quality draft	6	1	1.39	0	0	2	5.86	1991	NA	6	0	0	Not-determined	NA	NA	0	no viral genes detected
k141_1271429_length_1654_cov_975.0000	lytic	low quality draft	4	0	0	2	4.45	2	10.49	1654	NA	4	3	0	Low-quality	3.78	AAI-based (medium-confidence)	0
k141_127149_length_2263_cov_11.0000	lytic	low quality draft	4	0	0	1	0.18	1	0.95	2263	NA	4	0	0	Not-determined	NA	NA	0	no viral genes detected
k141_1271817_length_12022_cov_55.0000	lytic	low quality draft	14	2	0.24	2	0.25	3	3.17	12022	NA	14	1	2	Low-quality	11.13	HMM-based (lower-bound)	0
k141_1272485_length_3158_cov_176.0000	lytic	low quality draft	8	0	0	0	0	1	0.06	3158	NA	8	0	0	Low-quality	5.9	AAI-based (medium-confidence)	0	no viral genes detected
k141_1272521_length_1743_cov_18.0000	lytic	low quality draft	5	0	0	0	0	2	1.93	1743	NA	5	1	0	Low-quality	0.7	HMM-based (lower-bound)	0
k141_1272592_length_1138_cov_314.0000	lytic	low quality draft	4	0	0	1	7.58	1	8.05	1138	NA	4	1	0	Low-quality	1.75	AAI-based (medium-confidence)	0
k141_1273021_length_2506_cov_2754.0000	lytic	low quality draft	4	1	1.86	1	2.88	2	20	2506	NA	4	1	0	Low-quality	4.8	AAI-based (medium-confidence)	0
k141_127450_length_4269_cov_300.0000	lytic	low quality draft	10	2	4.72	4	3.76	3	11.47	4269	NA	10	3	0	Low-quality	9	AAI-based (high-confidence)	0
k141_1274644_length_3923_cov_1284.1436	lytic	low quality draft	6	0	0	2	15.16	2	16.1	3923	NA	7	2	0	Low-quality	2.51	HMM-based (lower-bound)	0
k141_1274967_length_3571_cov_1016.8525	lytic	low quality draft	5	1	4.3	1	4.14	2	10.25	3571	NA	5	1	0	Low-quality	1.61	HMM-based (lower-bound)	0
k141_1275393_length_11543_cov_55.0000	lytic	low quality draft	21	0	0	0	0	1	0.86	11543	NA	21	4	0	Low-quality	10.29	HMM-based (lower-bound)	0
k141_1275546_length_1995_cov_243.0000	lytic	low quality draft	5	0	0	0	0	2	0.27	1995	NA	5	2	0	Low-quality	1.49	HMM-based (lower-bound)	0
k141_1276001_length_1137_cov_195.1566	lytic	low quality draft	4	0	0	0	0	2	2.88	1137	NA	4	1	0	Low-quality	1.12	HMM-based (lower-bound)	0
k141_127603_length_2630_cov_25.0000	lytic	low quality draft	4	0	0	0	0	3	6.28	2630	NA	4	3	0	Low-quality	3.46	AAI-based (high-confidence)	0
k141_1276256_length_1863_cov_84.0000	lytic	low quality draft	5	0	0	0	0	1	1.41	1863	NA	5	1	0	Low-quality	4.43	HMM-based (lower-bound)	0
k141_1276373_length_3169_cov_41.0000	lytic	low quality draft	6	0	0	1	2.87	1	10	3169	NA	6	1	0	Low-quality	4.74	HMM-based (lower-bound)	0
k141_1276498_length_2108_cov_1622.8810	lytic	low quality draft	4	0	0	2	1.26	1	3.18	2108	NA	4	2	0	Low-quality	3.89	AAI-based (medium-confidence)	0
k141_1276537_length_16855_cov_229.6658	lytic	low quality draft	24	2	1.44	4	3.78	3	21.41	16855	NA	24	2	0	Low-quality	7	HMM-based (lower-bound)	0
k141_1276539_length_23616_cov_118.5663	lytic	medium quality draft	33	2	5.04	9	5.88	20	50.94	23616	NA	33	20	0	Medium-quality	56.28	AAI-based (high-confidence)	0
k141_1276908_length_9944_cov_77.0000	lysogenic	low quality draft	12	4	24.52	4	18.6	4	36.23	9944	NA	12	0	0	Not-determined	NA	NA	0	no viral genes detected
k141_1277087_length_2442_cov_199.0000	lytic	low quality draft	6	0	0	1	0.23	1	4.07	2442	NA	5	0	0	Not-determined	NA	NA	0	no viral genes detected
k141_1277190_length_4836_cov_14.0000	lytic	low quality draft	7	1	0.08	1	0.12	1	0.34	4836	NA	7	0	0	Not-determined	NA	NA	0	no viral genes detected
k141_1277243_length_6764_cov_164.0000	lytic	low quality draft	11	0	0	0	0	1	0.18	6764	NA	10	1	0	Low-quality	2.31	HMM-based (lower-bound)	0
k141_1277287_length_1628_cov_91.0000	lytic	low quality draft	4	0	0	0	0	2	2	1628	NA	4	0	0	Not-determined	NA	NA	0	no viral genes detected
k141_1278316_length_2792_cov_45.0000	lytic	low quality draft	4	0	0	0	0	3	1.04	2792	NA	4	3	0	Low-quality	0.63	HMM-based (lower-bound)	0
k141_127832_length_17682_cov_112.5556	lytic	medium quality draft	18	5	8.41	4	4.48	13	50.86	17682	NA	18	11	0	Low-quality	4.31	AAI-based (medium-confidence)	0
k141_1278493_length_7765_cov_633.0000	lytic	low quality draft	16	1	1.6	2	1.58	4	18.74	7765	NA	16	1	0	Low-quality	3.41	AAI-based (medium-confidence)	0
k141_1279287_length_2179_cov_216.0000	lytic	low quality draft	4	0	0	0	0	3	18.14	2179	NA	4	3	0	Low-quality	1.52	HMM-based (lower-bound)	0
k141_1279514_length_6788_cov_151.0000	lytic	low quality draft	9	1	0.02	1	0.02	1	10	6788	NA	9	0	1	Not-determined	NA	NA	0	no viral genes detected
k141_1279559_length_4216_cov_1371.0000	lytic	low quality draft	10	1	2.08	2	6.51	1	10	4216	NA	10	1	0	Low-quality	7.38	HMM-based (lower-bound)	0
k141_1280239_length_2015_cov_181.0000	lytic	low quality draft	4	0	0	0	0	1	6.36	2015	NA	4	2	0	Low-quality	3.79	HMM-based (lower-bound)	0
k141_1280761_length_5022_cov_18.0000	lytic	low quality draft	5	0	0	0	0	4	9.48	5022	NA	5	4	0	Low-quality	6.79	AAI-based (high-confidence)	0
k141_1282896_length_2524_cov_1341.7986	lytic	low quality draft	4	0	0	2	3.1	2	10.35	2524	NA	4	2	0	Low-quality	4.09	HMM-based (lower-bound)	0
k141_1283232_length_2662_cov_1056.0000	lytic	low quality draft	6	0	0	1	1.01	4	25.04	2662	NA	6	4	0	Low-quality	5.45	AAI-based (high-confidence)	0
k141_1283645_length_6983_cov_1079.5364	lytic	low quality draft	11	0	0	4	4.09	6	26.07	6983	NA	11	5	0	Low-quality	18.07	AAI-based (medium-confidence)	0
k141_1284107_length_13193_cov_51.0000	lytic	low quality draft	18	2	2.31	2	0.21	2	0.69	13193	NA	18	0	1	Not-determined	NA	NA	0	no viral genes detected
k141_1284581_length_7405_cov_102.2709	lytic	low quality draft	6	1	0.01	0	0	1	0	7405	NA	6	1	0	Low-quality	0.62	HMM-based (lower-bound)	0
k141_1284745_length_3247_cov_13.0000	lytic	low quality draft	5	1	2.63	1	0	2	13.23	3247	1025	5	1	1	Low-quality	2.41	AAI-based (medium-confidence)	68.43
k141_1285050_length_2543_cov_354.0000	lytic	low quality draft	4	0	0	1	0.12	1	1.8	2543	NA	5	0	0	Not-determined	NA	NA	0	no viral genes detected
k141_1285223_length_7663_cov_40.0000	lytic	low quality draft	14	0	0	4	7.51	11	65.76	7663	NA	13	12	0	Low-quality	20.24	AAI-based (high-confidence)	0
k141_1286113_length_1821_cov_536.0000	lytic	low quality draft	4	1	2.36	0	0	2	3.02	1821	1541	4	2	1	Low-quality	0.69	HMM-based (lower-bound)	15.38
k141_1287151_length_4329_cov_663.0000	lytic	low quality draft	7	1	0.55	1	1	2	3.06	4329	NA	7	2	0	Low-quality	11.26	AAI-based (medium-confidence)	0
k141_128754_length_12517_cov_352.3013	lytic	low quality draft	18	3	5.18	8	14.15	14	61.93	12517	NA	18	12	0	Low-quality	28.43	AAI-based (medium-confidence)	0
k141_1287763_length_3702_cov_205.2974	lytic	low quality draft	7	0	0	0	0	1	0.45	3702	NA	7	1	0	Low-quality	1.39	HMM-based (lower-bound)	0
k141_1287855_length_1774_cov_363.0000	lytic	low quality draft	5	0	0	1	1	1	0.23	1774	NA	5	0	0	Not-determined	NA	NA	0	no viral genes detected
k141_1288331_length_4952_cov_88.0000	lytic	low quality draft	5	1	4.48	0	0	3	11.38	4952	NA	5	2	0	Low-quality	12.93	AAI-based (high-confidence)	0
k141_1288777_length_2042_cov_53.0000	lytic	low quality draft	5	0	0	0	0	1	0.32	2042	NA	4	0	0	Not-determined	NA	NA	0	no viral genes detected
k141_1289119_length_6759_cov_473.0000	lytic	low quality draft	10	1	2.41	6	16.21	6	34.26	6759	NA	8	6	0	Low-quality	17.34	AAI-based (medium-confidence)	0
k141_1289236_length_4191_cov_34.0000	lytic	low quality draft	4	0	0	1	0.23	3	1.34	4191	NA	4	3	0	Low-quality	6.53	HMM-based (lower-bound)	0
k141_128966_length_1186_cov_1400.0000	lytic	low quality draft	4	0	0	0	0	1	0.31	1186	NA	4	1	0	Low-quality	0.26	HMM-based (lower-bound)	0
k141_1289731_length_4709_cov_1200.7231	lytic	low quality draft	11	0	0	2	1.35	1	3.72	4709	NA	11	0	0	Not-determined	NA	NA	0	no viral genes detected
k141_1290469_length_2859_cov_1513.4680	lytic	low quality draft	5	1	4.5	1	2.85	2	5.83	2859	NA	5	2	0	Low-quality	4.49	HMM-based (lower-bound)	0
k141_1291682_length_6084_cov_20.0000	lytic	low quality draft	5	0	0	1	1	2	2.35	6084	NA	5	2	0	Low-quality	19.94	AAI-based (high-confidence)	0
k141_1291700_length_3958_cov_32.0000	lytic	low quality draft	4	1	2.41	4	14.6	3	30	3958	NA	4	4	0	Low-quality	10.11	AAI-based (medium-confidence)	0
k141_1291740_length_4600_cov_2935.0000	lytic	low quality draft	10	0	0	1	0.23	2	0.41	4600	NA	10	3	0	Low-quality	5.93	AAI-based (medium-confidence)	0
k141_1292211_length_1469_cov_241.0000	lytic	low quality draft	6	0	0	1	1.01	1	6.26	1469	NA	6	2	0	Low-quality	2.96	AAI-based (medium-confidence)	0
k141_1293042_length_1194_cov_1016.3305	lytic	low quality draft	5	0	0	0	0	1	6.05	1194	NA	5	1	0	Low-quality	2.02	AAI-based (medium-confidence)	0
k141_129408_length_5100_cov_47.0000	lytic	low quality draft	6	0	0	0	0	1	1	5100	NA	6	0	0	Not-determined	NA	NA	0	no viral genes detected
k141_1294638_length_69902_cov_928.7313	lytic	high quality draft	91	12	23.26	18	37.21	57	169.9	69902	NA	82	46	1	High-quality	98.28	AAI-based (high-confidence)	0
k141_1295259_length_3333_cov_26.0000	lytic	low quality draft	7	0	0	1	0.2	4	5.96	3333	NA	7	2	0	Low-quality	8.29	HMM-based (lower-bound)	0
k141_1295307_length_4547_cov_37.0000	lytic	low quality draft	8	1	2.24	3	3.29	4	17.02	4547	NA	8	5	0	Low-quality	9.6	AAI-based (medium-confidence)	0
k141_12955_length_2886_cov_438.1654	lytic	low quality draft	6	0	0	0	0	1	5.02	2886	NA	6	0	0	Not-determined	NA	NA	0	no viral genes detected
k141_1295586_length_4524_cov_561.0000	lytic	low quality draft	7	2	2.08	3	1.98	3	6.52	4524	NA	7	0	1	Low-quality	10.42	AAI-based (high-confidence)	0	no viral genes detected
k141_1295778_length_5563_cov_157.4354	lytic	low quality draft	11	2	2.84	3	2.92	5	14	5563	NA	11	2	0	Low-quality	1.34	HMM-based (lower-bound)	0
k141_1296024_length_6424_cov_307.0000	lytic	low quality draft	6	0	0	0	0	2	11.01	6424	NA	5	1	0	Low-quality	2.16	HMM-based (lower-bound)	0
k141_1296416_length_3722_cov_101.0000	lytic	low quality draft	5	0	0	0	0	1	2.09	3722	NA	5	1	0	Low-quality	1.68	HMM-based (lower-bound)	0
k141_1296445_length_15954_cov_32.0000	lytic	low quality draft	14	0	0	0	0	1	1.41	15954	NA	14	1	0	Low-quality	37.96	HMM-based (lower-bound)	0
k141_1298462_length_11453_cov_839.1142	lytic	low quality draft	21	1	0	3	2.96	7	30.15	11453	NA	22	11	0	Low-quality	18.11	HMM-based (lower-bound)	0
k141_1298684_length_5251_cov_127.0000	lytic	low quality draft	6	1	1.4	0	0	3	2.13	5251	NA	6	3	0	Low-quality	6.62	AAI-based (medium-confidence)	0
k141_1298739_length_3032_cov_590.1972	lytic	low quality draft	4	2	2.69	1	1.17	3	11.06	3032	NA	4	4	0	Low-quality	5	HMM-based (lower-bound)	0
k141_1299388_length_15804_cov_206.0730	lytic	medium quality draft	27	0	0	3	2.38	8	5.51	15804	NA	27	2	0	Low-quality	25.07	HMM-based (lower-bound)	0	low-confidence ITR
k141_1300768_length_1422_cov_1113.0000	lytic	low quality draft	4	0	0	1	1	1	2.01	1422	NA	4	1	0	Low-quality	2.66	AAI-based (high-confidence)	0
k141_130145_length_5957_cov_512.0000	lytic	low quality draft	4	0	0	0	0	1	0.04	5957	NA	4	0	0	Not-determined	NA	NA	0	no viral genes detected
k141_1301542_length_83530_cov_174.0000_fragment_1	lysogenic	low quality draft	8	2	2.9	6	3.04	7	8.26	7630	7081	8	3	1	Low-quality	21.74	AAI-based (medium-confidence)	7.2
k141_1302114_length_1611_cov_1884.0000	lytic	low quality draft	4	0	0	1	1	2	13.79	1611	NA	4	2	0	Low-quality	4.03	AAI-based (medium-confidence)	0
k141_1302288_length_4747_cov_294.0000	lytic	low quality draft	9	2	0.68	1	0.03	3	9.67	4747	NA	9	0	0	Not-determined	NA	NA	0	no viral genes detected
k141_1302426_length_24725_cov_165.1108	lytic	medium quality draft	25	4	9.09	4	8.28	19	124.48	24725	NA	25	20	0	Low-quality	6.57	AAI-based (medium-confidence)	0
k141_1302472_length_1669_cov_1280.0543	lytic	low quality draft	4	0	0	0	0	1	1.45	1669	NA	4	1	0	Low-quality	0.77	HMM-based (lower-bound)	0
k141_1302666_length_1867_cov_118.0000	lytic	low quality draft	4	1	2.88	0	0	2	0.8	1867	NA	4	0	0	Low-quality	3.42	AAI-based (medium-confidence)	0	no viral genes detected
k141_1302830_length_5718_cov_229.0000	lytic	complete circular	10	1	1.02	3	6.61	4	12.28	5718	3295	10	1	1	Low-quality	2.04	HMM-based (lower-bound)	42.37	low-confidence DTR
k141_1302898_length_8337_cov_764.9616	lytic	low quality draft	14	1	0.85	2	2.88	4	5.84	8337	NA	14	3	0	Low-quality	11.34	HMM-based (lower-bound)	0
k141_1303998_length_1130_cov_545.0000	lytic	low quality draft	5	1	2.08	0	0	2	0.41	1130	NA	5	1	0	Low-quality	2.93	HMM-based (lower-bound)	0
k141_1304394_length_2032_cov_1353.0000	lytic	low quality draft	4	0	0	2	1.11	1	0.2	2032	NA	4	0	0	Low-quality	10.64	AAI-based (medium-confidence)	0	no viral genes detected
k141_1304566_length_6092_cov_75.0032	lytic	low quality draft	7	0	0	0	0	3	1.65	6092	NA	7	2	0	Low-quality	14.34	AAI-based (medium-confidence)	0
k141_1304604_length_11464_cov_347.8120	lytic	low quality draft	18	2	3.36	4	10.9	8	47.53	11464	NA	18	6	0	Low-quality	10.55	HMM-based (lower-bound)	0
k141_1304656_length_4641_cov_643.9076	lytic	low quality draft	7	2	6.18	2	2.6	2	20	4641	NA	6	1	0	Low-quality	1.3	AAI-based (medium-confidence)	0
k141_1304663_length_1398_cov_374.0000	lytic	low quality draft	4	0	0	2	2.27	2	8.73	1398	NA	4	2	0	Low-quality	2.96	AAI-based (medium-confidence)	0
k141_1305618_length_2349_cov_126.0000	lytic	low quality draft	5	0	0	0	0	2	1.73	2349	NA	5	1	0	Low-quality	4.71	HMM-based (lower-bound)	0
k141_1306219_length_4065_cov_249.0196	lytic	low quality draft	7	0	0	1	2.88	2	10.79	4065	NA	7	2	0	Low-quality	7.59	AAI-based (medium-confidence)	0
k141_1307107_length_8400_cov_592.0000	lytic	low quality draft	17	6	9.23	5	4.65	7	21.68	8400	NA	17	0	1	Not-determined	NA	NA	0	no viral genes detected
k141_1307289_length_4169_cov_190.5519	lytic	low quality draft	5	0	0	3	2.21	2	4.19	4169	NA	5	4	0	Low-quality	5.79	HMM-based (lower-bound)	0
k141_1307522_length_1357_cov_16.0000	lytic	low quality draft	4	0	0	2	2	2	19.01	1357	NA	4	3	0	Low-quality	3.52	AAI-based (high-confidence)	0
k141_1308620_length_3702_cov_263.0000	lytic	low quality draft	5	0	0	0	0	1	0.06	3702	NA	5	1	0	Low-quality	34.51	HMM-based (lower-bound)	0
k141_1308887_length_2346_cov_1543.5927	lytic	low quality draft	6	0	0	0	0	1	3.44	2346	NA	6	1	0	Low-quality	1.48	HMM-based (lower-bound)	0
k141_1308900_length_2083_cov_1966.0000	lytic	low quality draft	6	0	0	1	0.97	4	9.06	2083	NA	6	4	0	Low-quality	3.74	HMM-based (lower-bound)	0
k141_1309070_length_4163_cov_35.0000	lytic	low quality draft	8	0	0	2	2.25	2	1.46	4163	NA	8	1	0	Low-quality	3.16	HMM-based (lower-bound)	0
k141_1310292_length_1332_cov_798.0000	lytic	low quality draft	4	0	0	1	0.29	1	1.53	1332	NA	4	1	0	Low-quality	3.2	HMM-based (lower-bound)	0
k141_1310884_length_2326_cov_1029.0000	lytic	low quality draft	4	0	0	1	1	1	2.63	2326	NA	4	1	0	Low-quality	4.52	AAI-based (medium-confidence)	0
k141_1311034_length_5825_cov_87.7769	lytic	low quality draft	15	1	2.08	0	0	2	11.28	5825	NA	15	1	0	Low-quality	10.17	HMM-based (lower-bound)	0
k141_1311367_length_141202_cov_145.0000_fragment_1	lysogenic	low quality draft	27	6	5.78	13	17.72	16	62.82	13733	NA	27	12	2	Low-quality	34.09	AAI-based (high-confidence)	0
k141_1311518_length_3374_cov_1012.0000	lytic	low quality draft	6	1	0.93	2	0.98	2	5.04	3374	NA	6	2	0	Low-quality	1.78	HMM-based (lower-bound)	0
k141_1312430_length_2042_cov_105.0000	lytic	low quality draft	4	0	0	1	5.12	1	10	2042	NA	4	1	0	Low-quality	4.44	AAI-based (medium-confidence)	0
k141_1312461_length_14294_cov_359.0000	lytic	low quality draft	22	2	3.49	5	5.91	10	32.71	14294	NA	22	5	0	Low-quality	3.6	AAI-based (medium-confidence)	0
k141_1312510_length_2954_cov_399.0000	lytic	low quality draft	9	0	0	0	0	1	4.72	2954	NA	9	2	0	Low-quality	4.87	AAI-based (medium-confidence)	0
k141_1312567_length_1575_cov_1426.0000	lytic	low quality draft	4	0	0	0	0	1	1.68	1575	NA	4	1	0	Low-quality	1.82	HMM-based (lower-bound)	0
k141_1313264_length_1781_cov_25.0000	lytic	low quality draft	4	0	0	0	0	1	0.44	1781	NA	4	1	0	Low-quality	0.67	HMM-based (lower-bound)	0
k141_1314161_length_1847_cov_168.0000	lytic	low quality draft	4	0	0	1	0.51	1	1.33	1847	NA	4	2	0	Low-quality	3.81	AAI-based (high-confidence)	0
k141_1314403_length_5784_cov_160.0000	lytic	low quality draft	7	1	1.4	0	0	3	4.6	5784	NA	7	1	0	Low-quality	9.97	AAI-based (medium-confidence)	0
k141_1314665_length_31748_cov_87.2014	lytic	complete circular	37	0	0	3	3.24	7	26.53	31748	NA	37	8	0	Low-quality	41.77	HMM-based (lower-bound)	0
k141_1315158_length_1376_cov_79.0000	lytic	low quality draft	4	0	0	0	0	2	0.82	1376	NA	4	2	0	Low-quality	1.17	AAI-based (medium-confidence)	0
k141_1315621_length_3369_cov_637.4449	lytic	low quality draft	4	0	0	3	2.32	3	8.69	3369	NA	4	3	0	Low-quality	7.24	AAI-based (medium-confidence)	0
k141_1316275_length_2284_cov_803.0000	lytic	low quality draft	4	0	0	1	0.11	2	0.48	2284	NA	4	0	0	Low-quality	3.18	AAI-based (high-confidence)	0	no viral genes detected
k141_1316462_length_2423_cov_582.0000	lytic	low quality draft	6	1	5.15	1	0.05	1	0.59	2423	NA	6	0	0	Not-determined	NA	NA	0	no viral genes detected
k141_1316990_length_11600_cov_126.8913	lytic	low quality draft	24	2	8.65	8	17.5	8	49.08	11600	NA	22	6	0	Low-quality	25.31	AAI-based (medium-confidence)	0
k141_1317026_length_8802_cov_926.3414	lytic	low quality draft	9	0	0	0	0	2	10.86	8802	NA	9	3	0	Low-quality	21.46	AAI-based (medium-confidence)	0
k141_1317451_length_1356_cov_481.0000	lytic	low quality draft	5	0	0	0	0	1	4.28	1356	NA	5	1	0	Low-quality	0.76	HMM-based (lower-bound)	0
k141_131759_length_43585_cov_482.0000	lytic	complete circular	52	8	10.69	28	38.45	33	91.59	43585	NA	52	30	0	Complete	100	DTR (medium-confidence)	0
k141_131779_length_5413_cov_43.0000	lytic	low quality draft	4	0	0	0	0	2	2	5413	NA	4	3	0	Low-quality	1.83	HMM-based (lower-bound)	0
k141_1317866_length_5028_cov_1724.4758	lytic	low quality draft	6	0	0	2	5.37	5	10.45	5028	NA	6	5	0	Low-quality	10.23	HMM-based (lower-bound)	0
k141_1318134_length_1642_cov_481.0000	lytic	low quality draft	5	1	1.46	1	1.28	2	4.6	1642	NA	5	1	0	Low-quality	1.72	AAI-based (medium-confidence)	0
k141_1318483_length_6058_cov_142.0000	lytic	low quality draft	11	1	1.86	5	8.35	7	42.1	6058	NA	11	7	1	Low-quality	11.84	HMM-based (lower-bound)	0
k141_1318497_length_3880_cov_1650.8203	lytic	low quality draft	7	0	0	1	0.08	1	0.07	3880	NA	7	0	0	Not-determined	NA	NA	0	no viral genes detected
k141_1318842_length_6627_cov_187.0000	lytic	low quality draft	9	1	3.96	1	3.79	3	11.86	6627	NA	9	1	0	Low-quality	2.26	HMM-based (lower-bound)	0
k141_1319419_length_1535_cov_251.8336	lytic	low quality draft	5	0	0	0	0	1	0.59	1535	NA	5	1	0	Low-quality	2.03	HMM-based (lower-bound)	0
k141_1319694_length_2885_cov_28.0000	lytic	low quality draft	6	0	0	2	2	2	8.52	2885	NA	6	3	0	Low-quality	4.92	HMM-based (lower-bound)	0
k141_1319835_length_2335_cov_225.0000	lytic	low quality draft	5	1	1.46	1	1.28	2	4.6	2335	NA	5	1	0	Low-quality	2.3	HMM-based (lower-bound)	0
k141_131992_length_1714_cov_1127.0000	lytic	low quality draft	4	0	0	0	0	1	3.08	1714	NA	4	1	0	Low-quality	2.27	AAI-based (medium-confidence)	0
k141_1320131_length_1109_cov_13.0000	lytic	low quality draft	4	0	0	0	0	1	3.44	1109	NA	4	0	0	Not-determined	NA	NA	0	no viral genes detected
k141_1320239_length_2307_cov_610.1602	lytic	low quality draft	5	0	0	0	0	1	10	2307	NA	5	1	0	Low-quality	1.12	HMM-based (lower-bound)	0
k141_1321936_length_1671_cov_37.0000	lytic	low quality draft	5	1	3.5	3	4.34	3	14.49	1671	NA	5	3	0	Low-quality	3.58	AAI-based (high-confidence)	0
k141_1321981_length_3266_cov_460.8278	lysogenic	low quality draft	8	1	0.65	3	11.49	2	20	3266	NA	8	1	0	Low-quality	7.37	AAI-based (medium-confidence)	0
k141_132208_length_2500_cov_1477.0000	lytic	low quality draft	4	0	0	0	0	1	1	2500	NA	4	1	0	Low-quality	4.71	HMM-based (lower-bound)	0
k141_1322293_length_12089_cov_64.9973	lytic	low quality draft	20	3	3.49	2	2.24	6	17.78	12089	NA	16	3	1	Low-quality	3.26	AAI-based (medium-confidence)	0
k141_1322995_length_2804_cov_1849.0248	lytic	low quality draft	9	0	0	1	1.34	1	0.15	2804	NA	9	0	0	Low-quality	6.55	AAI-based (medium-confidence)	0	no viral genes detected
k141_1323219_length_5551_cov_97.0000	lytic	low quality draft	5	0	0	0	0	3	0.96	5551	NA	4	3	0	Low-quality	1.13	AAI-based (medium-confidence)	0
k141_1323365_length_7523_cov_485.3254	lytic	low quality draft	5	0	0	1	0.01	3	4.05	7523	NA	5	2	0	Low-quality	2.61	HMM-based (lower-bound)	0
k141_1323485_length_1641_cov_1571.8993	lytic	low quality draft	4	0	0	0	0	1	0.18	1641	NA	4	1	0	Low-quality	0.44	HMM-based (lower-bound)	0
k141_1324033_length_4555_cov_352.1613	lytic	low quality draft	8	1	2.88	5	4.56	3	17.2	4555	NA	8	3	0	Low-quality	6.63	HMM-based (lower-bound)	0
k141_1324205_length_2309_cov_292.0000	lytic	low quality draft	5	0	0	0	0	4	10.33	2309	NA	5	5	0	Low-quality	5.72	AAI-based (high-confidence)	0
k141_1324308_length_1765_cov_796.0000	lytic	low quality draft	4	0	0	0	0	1	0.11	1765	NA	4	0	0	Not-determined	NA	NA	0	no viral genes detected
k141_1324533_length_3204_cov_13.0000	lytic	low quality draft	4	0	0	1	1.25	4	11.24	3204	NA	4	4	0	Low-quality	6.77	AAI-based (medium-confidence)	0
k141_1324694_length_1776_cov_469.0000	lytic	low quality draft	4	0	0	2	6.04	2	20	1776	NA	4	2	0	Low-quality	4.45	AAI-based (medium-confidence)	0
k141_1324872_length_1952_cov_252.8631	lytic	low quality draft	4	1	0.69	1	0.93	2	5.29	1952	NA	4	2	0	Low-quality	4.61	AAI-based (medium-confidence)	0
k141_1324999_length_3237_cov_28.0000	lytic	low quality draft	5	1	0.34	3	2.92	3	14.98	3237	NA	5	3	0	Low-quality	7.71	AAI-based (high-confidence)	0
k141_1325312_length_1937_cov_292.0000	lytic	low quality draft	4	0	0	0	0	3	8.4	1937	NA	4	3	0	Low-quality	2.73	AAI-based (medium-confidence)	0
k141_1325513_length_2272_cov_1195.8362	lytic	low quality draft	5	0	0	1	0.93	2	15.86	2272	NA	5	0	0	Low-quality	4.31	AAI-based (medium-confidence)	0	no viral genes detected
k141_1326800_length_1048_cov_1678.0000	lytic	low quality draft	4	0	0	0	0	1	1.1	1048	NA	4	1	0	Low-quality	2.07	AAI-based (medium-confidence)	0
k141_1327372_length_1876_cov_28.0000	lytic	low quality draft	4	0	0	0	0	2	3.93	1876	NA	4	2	0	Low-quality	2.91	HMM-based (lower-bound)	0
k141_1327411_length_2256_cov_45.0000	lytic	low quality draft	5	1	5.15	2	1.05	3	3.45	2256	NA	5	2	0	Low-quality	4.89	AAI-based (medium-confidence)	0
k141_132747_length_1672_cov_797.1437	lytic	low quality draft	5	0	0	0	0	1	0.34	1672	NA	5	2	0	Low-quality	1.59	HMM-based (lower-bound)	0
k141_1327629_length_1802_cov_469.0000	lytic	low quality draft	5	1	0.54	2	0.54	3	2.97	1802	NA	5	2	0	Low-quality	3.26	AAI-based (medium-confidence)	0
k141_132777_length_1862_cov_1417.3579	lytic	low quality draft	4	0	0	1	0.29	1	1	1862	NA	4	1	0	Low-quality	3.51	HMM-based (lower-bound)	0
k141_1327854_length_2084_cov_415.0000	lytic	low quality draft	5	0	0	1	0.39	1	2.47	2084	NA	5	1	0	Low-quality	3.74	AAI-based (medium-confidence)	0
k141_1328447_length_3142_cov_2239.0000	lytic	low quality draft	8	1	0.12	0	0	2	0.85	3142	NA	8	1	0	Low-quality	1.18	HMM-based (lower-bound)	0
k141_1328846_length_5663_cov_33.0000	lytic	low quality draft	6	0	0	0	0	2	5.53	5663	NA	6	2	0	Low-quality	10.05	HMM-based (lower-bound)	0
k141_1329054_length_1782_cov_20.0000	lytic	low quality draft	5	0	0	2	0.54	4	7.38	1782	NA	5	3	0	Low-quality	4.08	AAI-based (high-confidence)	0
k141_1330017_length_2347_cov_1409.5739	lytic	low quality draft	7	2	6.17	1	1	4	16.69	2347	NA	8	3	0	Low-quality	2.77	AAI-based (medium-confidence)	0
k141_1330484_length_4505_cov_44.0000	lytic	low quality draft	9	3	1.16	2	1.11	3	10.28	4505	NA	9	0	0	Not-determined	NA	NA	0	no viral genes detected
k141_1330676_length_1929_cov_284.9172	lytic	low quality draft	4	0	0	0	0	2	8.62	1929	NA	4	1	0	Low-quality	2.69	HMM-based (lower-bound)	0
k141_1330972_length_5146_cov_123.0000	lytic	low quality draft	7	1	0.57	1	1.27	1	2.34	5146	NA	5	0	1	Not-determined	NA	NA	0	no viral genes detected
k141_1331167_length_2172_cov_207.0000	lytic	low quality draft	6	0	0	0	0	1	3.44	2172	NA	6	0	0	Low-quality	4.07	AAI-based (medium-confidence)	0	no viral genes detected
k141_1331238_length_3848_cov_1917.9943	lytic	low quality draft	6	1	0.15	1	1	1	0.42	3848	NA	6	0	0	Low-quality	7.24	AAI-based (medium-confidence)	0	no viral genes detected
k141_1331349_length_4280_cov_1280.0000	lytic	low quality draft	5	0	0	1	0.35	1	4.29	4280	NA	5	0	0	Not-determined	NA	NA	0	no viral genes detected
k141_1331528_length_6523_cov_98.9735	lytic	low quality draft	7	0	0	0	0	1	1.01	6523	NA	7	2	0	Low-quality	2.19	HMM-based (lower-bound)	0
k141_133188_length_24938_cov_612.8453	lysogenic	medium quality draft	33	10	23.48	20	28.63	19	71.78	24938	NA	33	14	0	Low-quality	49.55	AAI-based (high-confidence)	0
k141_1332084_length_1658_cov_2143.0000	lytic	low quality draft	5	1	1.09	3	9.13	2	12.74	1658	NA	5	4	0	Low-quality	4.88	AAI-based (high-confidence)	0
k141_1333351_length_2982_cov_376.0000	lytic	low quality draft	6	0	0	0	0	1	3.4	2982	NA	6	2	0	Low-quality	1.03	HMM-based (lower-bound)	0
k141_1333454_length_3217_cov_291.0000	lytic	low quality draft	5	0	0	2	2.43	3	9.39	3217	NA	5	3	0	Low-quality	7.12	AAI-based (medium-confidence)	0
k141_1333531_length_3750_cov_17.0000	lytic	low quality draft	6	0	0	1	1	3	22.35	3750	NA	6	3	0	Low-quality	8.81	AAI-based (high-confidence)	0
k141_1333981_length_1781_cov_326.0000	lytic	low quality draft	4	0	0	2	0.39	2	0.12	1781	NA	4	3	0	Low-quality	16.6	HMM-based (lower-bound)	0
k141_1334112_length_4322_cov_369.4245	lytic	low quality draft	5	0	0	2	5.3	3	20.38	4322	NA	5	3	0	Low-quality	3.02	HMM-based (lower-bound)	0
k141_1334645_length_3654_cov_565.4614	lytic	low quality draft	7	1	0.95	3	5.55	3	12.28	3654	NA	7	3	0	Low-quality	9.28	AAI-based (high-confidence)	0
k141_1335355_length_1614_cov_767.1561	lytic	low quality draft	4	0	0	0	0	1	1.86	1614	NA	4	0	0	Not-determined	NA	NA	0	no viral genes detected
k141_1335401_length_2089_cov_42.0000	lytic	low quality draft	4	0	0	0	0	1	0.45	2089	NA	4	1	0	Low-quality	0.78	HMM-based (lower-bound)	0
k141_1336069_length_1402_cov_538.0000	lytic	low quality draft	4	0	0	1	0.93	1	4.77	1402	NA	5	0	0	Low-quality	3.14	AAI-based (medium-confidence)	0	no viral genes detected
k141_1336319_length_7026_cov_59.0000	lysogenic	low quality draft	11	1	0.04	6	1.6	8	9.88	7026	NA	12	5	0	Low-quality	18.11	AAI-based (high-confidence)	0
k141_133652_length_3951_cov_462.0000	lytic	low quality draft	10	0	0	0	0	2	1.47	3951	NA	10	3	0	Low-quality	7.8	AAI-based (high-confidence)	0
k141_1336732_length_3974_cov_23.0000	lytic	low quality draft	5	1	0.52	3	3.05	3	23.44	3974	NA	5	3	0	Low-quality	11.73	AAI-based (high-confidence)	0
k141_1336909_length_1216_cov_311.0000	lytic	low quality draft	4	0	0	0	0	1	0.07	1216	NA	4	0	0	Not-determined	NA	NA	0	no viral genes detected
k141_1337338_length_4156_cov_16.0000	lytic	low quality draft	5	1	2.83	3	4.19	4	26.99	4156	NA	5	4	0	Low-quality	9.39	AAI-based (high-confidence)	0
k141_1337404_length_10476_cov_16.0000	lytic	low quality draft	8	0	0	1	0.72	2	12.76	10476	NA	7	0	0	Not-determined	NA	NA	0	no viral genes detected
k141_1337757_length_5460_cov_481.0000	lytic	low quality draft	6	1	0.29	1	0.19	1	0.72	5460	NA	6	0	0	Not-determined	NA	NA	0	no viral genes detected
k141_1338518_length_41709_cov_440.9889	lysogenic	low quality draft	64	5	13.18	14	25.05	39	135.15	41709	NA	64	34	0	High-quality	96.53	AAI-based (high-confidence)	0
k141_1338759_length_6082_cov_303.1365	lytic	low quality draft	9	1	0.06	0	0	1	0.61	6082	NA	10	1	0	Low-quality	4.72	HMM-based (lower-bound)	0
k141_1339501_length_4911_cov_1709.6629	lytic	low quality draft	4	2	3.28	2	1.71	3	13.81	4911	NA	4	3	0	Low-quality	1.31	AAI-based (high-confidence)	0
k141_1339929_length_9169_cov_3177.3457	lytic	low quality draft	9	1	1.24	3	5.32	4	27.56	9169	NA	9	2	0	Low-quality	12.06	AAI-based (medium-confidence)	0
k141_1340049_length_1523_cov_19.0000	lytic	low quality draft	4	0	0	1	2.1	1	0.82	1523	NA	4	2	0	Low-quality	1.91	HMM-based (lower-bound)	0
k141_1340085_length_1898_cov_34.0000	lytic	low quality draft	6	0	0	1	1	1	2.01	1898	NA	6	1	0	Low-quality	3.55	AAI-based (medium-confidence)	0
k141_1340183_length_2226_cov_310.0000	lytic	low quality draft	5	1	2.25	3	4.09	3	17.16	2226	NA	5	3	0	Low-quality	4.91	AAI-based (medium-confidence)	0
k141_1340867_length_1333_cov_966.0000	lytic	low quality draft	4	0	0	0	0	1	0.31	1333	NA	4	1	0	Low-quality	0.43	HMM-based (lower-bound)	0
k141_1341131_length_1386_cov_601.0000	lytic	low quality draft	4	0	0	1	0.2	2	1.65	1386	NA	4	2	0	Low-quality	3.45	HMM-based (lower-bound)	0
k141_1341541_length_6757_cov_242.0110	lytic	low quality draft	11	0	0	0	0	4	3.76	6757	NA	11	3	0	Low-quality	2.73	AAI-based (medium-confidence)	0
k141_1341571_length_1553_cov_9.0000	lytic	low quality draft	4	0	0	1	0.56	3	11.28	1553	NA	4	1	0	Low-quality	3.32	HMM-based (lower-bound)	0
k141_1341746_length_79030_cov_324.0000_fragment_1	lysogenic	medium quality draft	38	8	13.11	30	54.21	33	140.25	29173	NA	38	27	0	Medium-quality	84.87	AAI-based (medium-confidence)	0
k141_1341768_length_10027_cov_258.1289	lytic	medium quality draft	16	2	4.66	3	5.42	6	36.22	10027	NA	15	3	0	Low-quality	4.48	HMM-based (lower-bound)	0
k141_1341965_length_4458_cov_109.0000	lytic	low quality draft	5	0	0	0	0	1	4.07	4458	NA	5	2	0	Low-quality	4.89	AAI-based (high-confidence)	0
k141_1342322_length_1272_cov_1480.0000	lytic	low quality draft	5	0	0	1	1.65	1	6.05	1272	NA	5	1	0	Low-quality	1.13	HMM-based (lower-bound)	0
k141_1342345_length_10865_cov_165.0000	lytic	low quality draft	18	2	0.97	1	0.01	4	17.18	10865	NA	18	3	1	Low-quality	4.72	HMM-based (lower-bound)	0
k141_1342592_length_1646_cov_42.0000	lytic	low quality draft	4	0	0	2	2	3	6.13	1646	NA	4	3	0	Low-quality	4.47	AAI-based (medium-confidence)	0
k141_1342676_length_2165_cov_29.0000	lytic	low quality draft	4	0	0	0	0	1	0.04	2165	NA	4	1	0	Low-quality	47.09	AAI-based (medium-confidence)	0
k141_1343085_length_2006_cov_55.0000	lytic	low quality draft	4	2	0.51	2	1.3	3	5.54	2006	NA	4	2	0	Low-quality	3.94	AAI-based (high-confidence)	0
k141_1343694_length_6354_cov_268.0000	lytic	low quality draft	10	0	0	5	4.2	5	27.42	6354	NA	10	7	0	Low-quality	13.15	AAI-based (medium-confidence)	0
k141_1343958_length_2071_cov_380.0000	lytic	low quality draft	4	0	0	1	2.1	3	11.22	2071	NA	4	3	1	Low-quality	4.12	AAI-based (medium-confidence)	0
k141_1344073_length_3417_cov_156.0000	lytic	low quality draft	5	1	0.84	1	0.77	3	2.81	3417	NA	5	1	0	Low-quality	36.64	AAI-based (high-confidence)	0
k141_1344694_length_2357_cov_3334.0000	lytic	low quality draft	4	0	0	0	0	2	0.12	2357	NA	6	2	0	Low-quality	21.97	HMM-based (lower-bound)	0
k141_1345141_length_24361_cov_21.2596	lytic	low quality draft	34	6	15.05	5	8.8	10	33.31	24361	NA	34	2	1	Low-quality	7.3	HMM-based (lower-bound)	0
k141_1345266_length_1550_cov_443.0000	lytic	low quality draft	5	1	1.48	2	1.81	2	9.09	1550	NA	5	1	0	Low-quality	0.97	HMM-based (lower-bound)	0
k141_1345947_length_4247_cov_648.9157	lytic	low quality draft	10	1	4.34	3	7.22	5	17.82	4247	NA	10	3	0	Low-quality	8.07	AAI-based (high-confidence)	0
k141_1346426_length_6104_cov_1066.8578	lytic	low quality draft	6	2	1.27	1	1.39	2	5.99	6104	NA	6	0	1	Not-determined	NA	NA	0	no viral genes detected
k141_1346628_length_2771_cov_1355.5243	lytic	low quality draft	4	2	4.1	3	4.96	3	10.65	2771	NA	4	1	0	Low-quality	2.46	HMM-based (lower-bound)	0
k141_1346650_length_2310_cov_28.0000	lytic	low quality draft	6	0	0	0	0	2	10.08	2310	NA	6	1	0	Low-quality	4.45	AAI-based (medium-confidence)	0
k141_1346822_length_2432_cov_674.0000	lytic	low quality draft	5	1	1.06	2	0.35	2	6.86	2432	NA	5	1	0	Low-quality	1.51	HMM-based (lower-bound)	0
k141_1346878_length_1755_cov_102.0000	lytic	low quality draft	6	0	0	0	0	1	2.25	1755	NA	6	0	0	Low-quality	4.01	AAI-based (medium-confidence)	0	no viral genes detected
k141_1347147_length_2708_cov_416.9887	lytic	low quality draft	5	0	0	0	0	1	1	2708	NA	5	2	0	Low-quality	2.98	HMM-based (lower-bound)	0
k141_1347759_length_2402_cov_2139.0000	lytic	low quality draft	7	0	0	1	0.23	3	7.25	2402	NA	7	2	0	Low-quality	4.56	AAI-based (medium-confidence)	0
k141_1348079_length_7101_cov_974.3934	lytic	low quality draft	7	0	0	0	0	5	6.97	7101	NA	7	4	0	Low-quality	2.4	HMM-based (lower-bound)	0
k141_1348118_length_1580_cov_149.0069	lytic	low quality draft	4	0	0	1	0.06	1	0.45	1580	NA	4	1	0	Low-quality	0.69	HMM-based (lower-bound)	0
k141_1348129_length_7649_cov_62.0000	lytic	low quality draft	8	1	1	3	2.55	1	3.08	7649	NA	8	0	0	Not-determined	NA	NA	0	no viral genes detected
k141_134878_length_1350_cov_2589.0000	lytic	low quality draft	4	1	0.01	3	0.24	3	1.95	1350	NA	4	0	0	Not-determined	NA	NA	0	no viral genes detected
k141_1349084_length_5516_cov_407.0000	lytic	low quality draft	6	2	3.55	3	3.78	2	10.09	5516	NA	6	0	0	Not-determined	NA	NA	0	no viral genes detected
k141_1349415_length_3426_cov_16.0000	lytic	low quality draft	6	0	0	4	2.25	5	4.76	3426	NA	6	4	0	Low-quality	11.04	AAI-based (medium-confidence)	0
k141_1349836_length_3586_cov_73.0000	lytic	low quality draft	5	0	0	0	0	4	4.2	3586	NA	5	4	0	Low-quality	8.25	AAI-based (high-confidence)	0
k141_1350196_length_4036_cov_1294.0000	lytic	low quality draft	6	2	3.65	2	8.57	2	20	4036	NA	6	0	0	Low-quality	8.22	AAI-based (medium-confidence)	0	no viral genes detected
k141_1350268_length_3445_cov_34.0000	lytic	low quality draft	8	0	0	1	0.97	1	5.7	3445	NA	8	3	0	Low-quality	8.01	AAI-based (high-confidence)	0
k141_1350358_length_7012_cov_99.0000	lytic	low quality draft	6	1	0.34	2	2.35	1	0.45	7012	NA	6	0	0	Not-determined	NA	NA	0	no viral genes detected
k141_1350997_length_3392_cov_1023.9259	lytic	low quality draft	11	1	0.69	1	0.93	2	7.06	3392	NA	11	3	0	Low-quality	4.82	HMM-based (lower-bound)	0
k141_1351001_length_3776_cov_892.2468	lytic	low quality draft	6	0	0	0	0	5	15.73	3776	NA	6	4	0	Low-quality	6.56	AAI-based (high-confidence)	0
k141_1351641_length_23097_cov_49.0000	lytic	low quality draft	29	0	0	9	8.42	25	62.73	23097	NA	29	23	0	Medium-quality	59.01	AAI-based (high-confidence)	0
k141_1351976_length_5802_cov_1430.6663	lytic	low quality draft	8	0	0	0	0	7	23.39	5802	NA	8	6	0	Low-quality	11.97	AAI-based (high-confidence)	0
k141_1352112_length_4655_cov_549.2424	lytic	low quality draft	7	2	5.26	2	3.04	2	10.83	4655	NA	7	0	0	Not-determined	NA	NA	0	no viral genes detected
k141_1353844_length_8558_cov_299.8870	lysogenic	low quality draft	14	4	15.15	4	18.84	6	31.41	8558	NA	14	4	0	Low-quality	17.2	AAI-based (medium-confidence)	0
k141_1353999_length_3549_cov_1763.0000	lytic	low quality draft	6	0	0	0	0	1	1	3549	NA	6	2	0	Low-quality	5.74	HMM-based (lower-bound)	0
k141_1354125_length_1780_cov_860.0000	lytic	low quality draft	5	1	4.3	1	4.14	2	10.57	1780	NA	5	2	0	Low-quality	1.4	AAI-based (medium-confidence)	0
k141_1355488_length_3919_cov_244.0000	lytic	low quality draft	9	0	0	1	0.62	2	2.2	3919	NA	9	1	0	Low-quality	2.42	HMM-based (lower-bound)	0
k141_1356027_length_14444_cov_118.0000	lytic	medium quality draft	27	1	0.74	5	3.98	9	8.77	14444	NA	27	3	0	Low-quality	18.6	HMM-based (lower-bound)	0
k141_135607_length_2467_cov_1110.0000	lytic	low quality draft	4	0	0	0	0	1	3.65	2467	NA	6	1	0	Low-quality	4.52	AAI-based (medium-confidence)	0
k141_1356814_length_1985_cov_521.0000	lytic	low quality draft	4	0	0	2	0.37	1	4.29	1985	NA	4	0	0	Not-determined	NA	NA	0	no viral genes detected
k141_1357194_length_3857_cov_298.0000	lytic	low quality draft	5	1	2.41	2	9.9	3	30	3857	NA	4	3	0	Low-quality	3.73	HMM-based (lower-bound)	0
k141_1357236_length_50968_cov_147.4290	lytic	low quality draft	61	6	7.51	7	7.02	24	70.48	50968	NA	61	21	0	Low-quality	37.77	HMM-based (lower-bound)	0
k141_1357333_length_7818_cov_406.0000	lytic	low quality draft	6	0	0	0	0	3	6.32	7818	NA	6	4	0	Low-quality	2.44	HMM-based (lower-bound)	0
k141_1358100_length_4399_cov_442.8678	lytic	low quality draft	11	0	0	1	0.03	1	1.44	4399	NA	11	0	0	Not-determined	NA	NA	0	no viral genes detected
k141_1358419_length_1919_cov_22.0000	lytic	low quality draft	5	0	0	0	0	1	0.5	1919	NA	5	2	0	Low-quality	4.27	AAI-based (medium-confidence)	0
k141_1358456_length_3216_cov_117.0000	lytic	low quality draft	5	0	0	0	0	1	1	3216	NA	5	2	0	Low-quality	5.2	HMM-based (lower-bound)	0
k141_135871_length_3196_cov_670.2848	lytic	low quality draft	10	1	1.61	1	2.53	2	10.09	3196	NA	10	1	0	Low-quality	3.91	HMM-based (lower-bound)	0
k141_135989_length_8409_cov_240.2816	lytic	low quality draft	10	0	0	0	0	1	0.05	8409	NA	9	0	0	Not-determined	NA	NA	0	no viral genes detected
k141_1359990_length_19528_cov_108.5804	lytic	low quality draft	20	1	4.5	1	4.78	3	18.84	19528	NA	19	4	0	Low-quality	47.85	AAI-based (medium-confidence)	0
k141_1360301_length_1175_cov_1125.0000	lytic	low quality draft	5	0	0	0	0	1	0.2	1175	NA	5	0	0	Not-determined	NA	NA	0	no viral genes detected
k141_1360796_length_4041_cov_273.0000	lysogenic	low quality draft	7	1	2.87	1	9.33	5	13.79	4041	NA	7	3	0	Low-quality	7.71	AAI-based (high-confidence)	0
k141_1361242_length_1718_cov_127.0000	lytic	low quality draft	4	1	3.84	0	0	2	10.59	1718	NA	4	0	0	Low-quality	4.4	AAI-based (medium-confidence)	0	no viral genes detected
k141_1361595_length_43549_cov_215.0005_fragment_1	lysogenic	high quality draft	50	6	3.45	26	21.19	32	96	35607	NA	50	30	1	High-quality	93.42	AAI-based (high-confidence)	0
k141_1361695_length_1903_cov_65.0000	lytic	low quality draft	6	0	0	0	0	1	10	1903	NA	6	0	0	Not-determined	NA	NA	0	no viral genes detected
k141_1361878_length_1580_cov_469.0000	lytic	low quality draft	4	0	0	1	1	1	2.63	1580	NA	4	1	0	Low-quality	3.04	AAI-based (medium-confidence)	0
k141_1362000_length_3994_cov_683.2572	lytic	low quality draft	6	1	0.69	1	0.93	2	12.82	3994	NA	6	2	0	Low-quality	2.97	HMM-based (lower-bound)	0
k141_1362367_length_2789_cov_47.0000	lytic	low quality draft	5	2	2.53	2	0.51	3	14.52	2789	NA	5	0	0	Low-quality	5.1	AAI-based (medium-confidence)	0	no viral genes detected
k141_1362588_length_4586_cov_64.0000	lytic	low quality draft	7	1	0.03	1	0.39	1	1	4586	NA	7	1	0	Low-quality	2.73	HMM-based (lower-bound)	0
k141_1362927_length_2033_cov_103.0000	lytic	low quality draft	4	0	0	1	0.06	1	0.45	2033	NA	4	0	0	Not-determined	NA	NA	0	no viral genes detected
k141_1363197_length_6732_cov_37.0000	lytic	low quality draft	10	1	4.48	1	3.03	2	15.13	6732	NA	10	3	0	Low-quality	7.49	HMM-based (lower-bound)	0
k141_1363234_length_2917_cov_828.3184	lytic	low quality draft	6	1	0.72	3	3.94	3	14.56	2917	NA	6	2	0	Low-quality	6.49	AAI-based (high-confidence)	0
k141_136325_length_39588_cov_53.6737	lytic	high quality draft	23	1	1.04	1	1.13	11	15.66	39588	NA	23	9	0	Low-quality	13.62	HMM-based (lower-bound)	0
k141_1363259_length_2612_cov_179.0000	lytic	low quality draft	6	1	0.69	1	0.93	3	5.38	2612	NA	6	2	0	Low-quality	6.09	AAI-based (medium-confidence)	0
k141_1363267_length_8959_cov_945.8438	lytic	low quality draft	18	1	0.39	3	2.2	8	42.9	8959	NA	18	7	0	Low-quality	18.22	HMM-based (lower-bound)	0
k141_1363412_length_1052_cov_430.0000	lytic	low quality draft	4	0	0	2	2.4	2	17.11	1052	NA	4	2	0	Low-quality	1.9	HMM-based (lower-bound)	0
k141_1363456_length_9338_cov_35.9348	lytic	low quality draft	13	0	0	3	3.4	7	24.65	9338	NA	13	6	0	Low-quality	15.9	HMM-based (lower-bound)	0
k141_136365_length_3523_cov_445.0775	lytic	low quality draft	8	0	0	0	0	1	0.32	3523	NA	8	1	0	Low-quality	1.97	HMM-based (lower-bound)	0
k141_1364064_length_10366_cov_129.0438	lytic	low quality draft	8	0	0	0	0	3	3.01	10366	NA	8	2	0	Low-quality	3.5	HMM-based (lower-bound)	0
k141_1364106_length_3616_cov_865.0000	lytic	low quality draft	6	1	2.48	4	13.88	5	41.78	3616	NA	6	5	0	Low-quality	9.25	AAI-based (high-confidence)	0
k141_1364221_length_1809_cov_907.0000	lytic	low quality draft	6	0	0	1	2.75	2	13.85	1809	NA	6	2	0	Low-quality	3.99	AAI-based (high-confidence)	0
k141_136425_length_1734_cov_1233.0000	lytic	low quality draft	4	1	2.76	1	1.09	2	13.82	1734	NA	4	0	0	Low-quality	3.01	AAI-based (medium-confidence)	0	no viral genes detected
k141_1365370_length_8346_cov_425.0073	lytic	low quality draft	9	1	2.17	1	2.15	6	20.69	8346	NA	8	4	0	Low-quality	3.48	AAI-based (medium-confidence)	0
k141_1365381_length_1865_cov_667.0000	lytic	low quality draft	4	0	0	0	0	1	10	1865	NA	4	1	0	Low-quality	4.08	AAI-based (high-confidence)	0
k141_1365894_length_3745_cov_388.0000	lytic	low quality draft	7	0	0	1	0.14	1	0.65	3745	NA	7	2	0	Low-quality	8.7	AAI-based (medium-confidence)	0
k141_1366110_length_3126_cov_2356.0000	lytic	low quality draft	6	0	0	0	0	2	1.18	3126	NA	6	3	0	Low-quality	6.93	AAI-based (medium-confidence)	0
k141_1366144_length_9850_cov_191.0000	lytic	low quality draft	9	3	2.29	1	1.22	2	20	9850	NA	9	0	0	Not-determined	NA	NA	0	no viral genes detected
k141_1367411_length_1249_cov_3039.0000	lytic	low quality draft	4	0	0	0	0	2	4.09	1249	NA	4	1	0	Low-quality	0.84	HMM-based (lower-bound)	0
k141_1367456_length_1985_cov_34.0000	lytic	low quality draft	5	0	0	1	1.35	1	10	1985	NA	5	0	0	Low-quality	3.93	AAI-based (medium-confidence)	0	no viral genes detected
k141_1368635_length_3289_cov_862.2157	lytic	low quality draft	6	1	0.74	1	1.58	1	7.34	3289	NA	6	3	0	Low-quality	3.57	HMM-based (lower-bound)	0
k141_1368643_length_2581_cov_831.0000	lytic	low quality draft	5	0	0	2	1.99	3	9.21	2581	NA	5	3	0	Low-quality	2.78	HMM-based (lower-bound)	0
k141_1368658_length_2076_cov_968.0000	lytic	low quality draft	4	0	0	1	1	2	10.43	2076	NA	4	3	0	Low-quality	4.8	AAI-based (high-confidence)	0
k141_1368855_length_6352_cov_262.0000	lytic	low quality draft	8	0	0	2	0.46	1	1	6352	NA	8	1	0	Low-quality	4.29	HMM-based (lower-bound)	0
k141_1369664_length_1183_cov_582.0000	lytic	low quality draft	5	1	2.08	1	0.23	2	10.4	1183	NA	5	0	0	Not-determined	NA	NA	0	no viral genes detected
k141_1370018_length_8802_cov_197.9866	lytic	low quality draft	4	0	0	1	1	2	1.41	8802	NA	4	2	0	Low-quality	3.44	HMM-based (lower-bound)	0
k141_1370097_length_2016_cov_826.0000	lytic	low quality draft	5	2	5.08	4	8.6	3	22.37	2016	NA	5	2	0	Low-quality	5.22	AAI-based (high-confidence)	0
k141_1370160_length_2155_cov_8.0000	lytic	low quality draft	4	0	0	1	1.25	3	10.24	2155	NA	4	3	0	Low-quality	3.72	HMM-based (lower-bound)	0
k141_1370616_length_4858_cov_27.0000	lytic	low quality draft	4	0	0	0	0	1	1.63	4858	NA	4	2	0	Low-quality	11.63	AAI-based (medium-confidence)	0
k141_1371015_length_3322_cov_61.0000	lytic	low quality draft	5	0	0	0	0	3	14.34	3322	NA	5	4	0	Low-quality	6.51	AAI-based (medium-confidence)	0
k141_1371757_length_34438_cov_102.7005	lytic	low quality draft	35	0	0	0	0	21	21.37	34438	NA	34	19	0	Low-quality	14.04	AAI-based (medium-confidence)	0
k141_1371810_length_8144_cov_312.7064	lytic	low quality draft	7	0	0	0	0	2	3.12	8144	NA	7	1	0	Low-quality	2.98	HMM-based (lower-bound)	0
k141_1371895_length_2624_cov_9.0000	lytic	low quality draft	8	1	1.12	1	0.5	3	13.94	2624	NA	8	2	0	Low-quality	3.55	AAI-based (high-confidence)	0
k141_1371901_length_5362_cov_245.0000	lytic	low quality draft	8	0	0	1	1.25	4	16.58	5362	NA	8	7	0	Low-quality	9.08	HMM-based (lower-bound)	0
k141_1372446_length_15919_cov_162.8795	lytic	low quality draft	13	1	0.4	1	0.1	1	0.25	15919	NA	13	1	1	Low-quality	14.13	HMM-based (lower-bound)	0
k141_1372602_length_2784_cov_157.0000	lytic	low quality draft	5	0	0	0	0	1	0.33	2784	NA	5	1	0	Low-quality	0.63	HMM-based (lower-bound)	0
k141_1372632_length_2992_cov_862.0000	lytic	low quality draft	5	1	0.84	1	0.77	4	2.08	2992	NA	5	2	0	Low-quality	42.33	AAI-based (high-confidence)	0
k141_137275_length_2002_cov_1024.7227	lytic	low quality draft	5	0	0	1	0.63	1	4.47	2002	NA	5	1	0	Low-quality	5	AAI-based (medium-confidence)	0
k141_1372788_length_5345_cov_258.0000	lytic	low quality draft	10	0	0	2	3.87	1	10	5345	NA	8	3	0	Low-quality	7.36	HMM-based (lower-bound)	0
k141_1372913_length_1671_cov_859.0000	lytic	low quality draft	4	0	0	0	0	2	0.88	1671	NA	3	1	0	Low-quality	0.42	AAI-based (medium-confidence)	0
k141_1373147_length_30291_cov_168.4706_fragment_1	lysogenic	low quality draft	14	1	2.87	7	13.35	10	40.46	7685	NA	14	6	0	Low-quality	23.63	AAI-based (high-confidence)	0
k141_1373208_length_2700_cov_204.0000	lytic	low quality draft	6	0	0	1	0.16	1	0.9	2700	NA	6	0	0	Not-determined	NA	NA	0	no viral genes detected
k141_1373620_length_2649_cov_67.0000	lytic	low quality draft	5	1	1.39	0	0	3	7.68	2649	NA	5	2	0	Low-quality	4.25	AAI-based (medium-confidence)	0
k141_1374392_length_2115_cov_451.1454	lytic	low quality draft	7	0	0	0	0	2	0.17	2115	NA	7	1	0	Low-quality	0.84	HMM-based (lower-bound)	0
k141_1374478_length_3062_cov_74.0000	lytic	low quality draft	4	0	0	2	1.66	2	7.74	3062	NA	4	1	0	Low-quality	3.95	AAI-based (medium-confidence)	0
k141_1375014_length_1519_cov_1121.3824	lytic	low quality draft	5	0	0	1	5.99	1	0.06	1519	NA	5	0	0	Low-quality	3.24	AAI-based (medium-confidence)	0	no viral genes detected
k141_1375206_length_2244_cov_1290.8735	lytic	low quality draft	4	0	0	1	2.87	1	10	2244	NA	4	1	0	Low-quality	3.36	HMM-based (lower-bound)	0
k141_137673_length_4010_cov_1180.0000	lytic	low quality draft	5	0	0	0	0	2	1.69	4010	NA	5	2	0	Low-quality	1.61	AAI-based (medium-confidence)	0
k141_137692_length_6662_cov_435.0000	lytic	low quality draft	15	0	0	0	0	2	3.02	6662	NA	14	3	0	Low-quality	10.13	HMM-based (lower-bound)	0
k141_1378015_length_2467_cov_70.0000	lysogenic	low quality draft	4	1	7	1	9.33	3	14.44	2467	NA	4	0	0	Low-quality	5.24	AAI-based (medium-confidence)	0	no viral genes detected
k141_1378031_length_2219_cov_29.0000	lytic	low quality draft	4	0	0	0	0	1	1.12	2219	NA	4	1	0	Low-quality	0.72	HMM-based (lower-bound)	0
k141_1378256_length_2500_cov_36.0000	lytic	low quality draft	6	1	0.45	1	0.69	2	5.35	2500	NA	6	0	0	Not-determined	NA	NA	0	no viral genes detected
k141_1378482_length_2385_cov_1398.0000	lytic	low quality draft	6	1	2.08	2	6.51	1	10	2385	NA	6	0	0	Not-determined	NA	NA	0	no viral genes detected
k141_1378739_length_4691_cov_406.4508	lytic	low quality draft	9	3	10.11	4	13.62	5	25.57	4691	NA	9	3	0	Low-quality	10.79	AAI-based (high-confidence)	0
k141_1378889_length_3402_cov_24.0000	lytic	low quality draft	6	0	0	3	4.1	3	16.44	3402	NA	6	4	0	Low-quality	5.67	HMM-based (lower-bound)	0
k141_1379081_length_18744_cov_101.0000	lytic	medium quality draft	34	2	5.24	9	12.02	16	67.9	18744	NA	34	12	0	Low-quality	39.49	AAI-based (high-confidence)	0
k141_1380095_length_1026_cov_7.0000	lytic	low quality draft	4	0	0	0	0	1	1.82	1026	NA	4	1	0	Low-quality	0.54	HMM-based (lower-bound)	0
k141_1381045_length_3212_cov_778.2654	lytic	low quality draft	6	1	1	2	1.13	1	0.35	3212	NA	6	0	0	Not-determined	NA	NA	0	no viral genes detected
k141_1381068_length_1472_cov_824.8911	lytic	low quality draft	5	1	0.07	1	0.07	2	0.4	1472	NA	5	0	1	Not-determined	NA	NA	0	no viral genes detected
k141_1381404_length_1169_cov_596.0000	lytic	low quality draft	6	0	0	2	2	3	0.57	1169	NA	6	0	0	Low-quality	7.82	AAI-based (medium-confidence)	0	no viral genes detected
k141_1381918_length_4794_cov_85.0000	lytic	low quality draft	6	1	0.72	1	0.06	1	2.21	4794	NA	6	0	0	Not-determined	NA	NA	0	no viral genes detected
k141_1382245_length_2031_cov_944.0000	lytic	low quality draft	4	0	0	0	0	1	10	2031	NA	4	1	0	Low-quality	5.15	AAI-based (medium-confidence)	0
k141_1382459_length_7268_cov_44.0000	lytic	low quality draft	13	1	3.81	4	14.86	6	24.1	7268	NA	13	6	0	Low-quality	17.08	AAI-based (high-confidence)	0
k141_1382602_length_3491_cov_345.0000	lytic	low quality draft	5	0	0	0	0	3	10.44	3491	NA	5	1	0	Low-quality	0.94	AAI-based (high-confidence)	0
k141_1383318_length_3300_cov_2541.0804	lytic	low quality draft	5	1	0.62	0	0	2	13.28	3300	NA	5	0	0	Not-determined	NA	NA	0	no viral genes detected
k141_1384389_length_11652_cov_326.0086	lytic	low quality draft	10	2	0.53	2	0.49	2	2.39	11652	NA	10	0	1	Not-determined	NA	NA	0	no viral genes detected
k141_1384729_length_2078_cov_490.0000	lytic	low quality draft	6	0	0	0	0	1	0.06	2078	NA	5	1	0	Low-quality	3.09	HMM-based (lower-bound)	0
k141_1385368_length_3565_cov_2058.2812	lytic	low quality draft	4	0	0	1	1.52	2	16.78	3565	NA	4	2	0	Low-quality	3.88	AAI-based (medium-confidence)	0
k141_1385861_length_3750_cov_35.0000	lytic	low quality draft	5	0	0	1	2.29	1	1.52	3750	NA	5	2	0	Low-quality	8.75	AAI-based (high-confidence)	0
k141_138595_length_6949_cov_61.0000	lytic	low quality draft	9	1	2.41	4	14.6	5	37.54	6949	NA	9	7	0	Low-quality	18.14	AAI-based (high-confidence)	0
k141_1386091_length_4063_cov_421.0000	lytic	low quality draft	6	1	0.12	0	0	1	5.22	4063	NA	6	0	0	Not-determined	NA	NA	0	no viral genes detected
k141_1386106_length_1768_cov_9.0000	lytic	low quality draft	4	0	0	0	0	1	0.32	1768	NA	4	1	0	Low-quality	2.41	HMM-based (lower-bound)	0
k141_1386651_length_9033_cov_98.0000	lytic	low quality draft	13	3	6.15	8	15.81	9	47.84	9033	NA	13	9	0	Low-quality	20.78	AAI-based (high-confidence)	0
k141_1386983_length_10747_cov_202.7621	lytic	low quality draft	7	2	0.41	2	2.14	2	0.71	10747	NA	8	0	1	Not-determined	NA	NA	0	no viral genes detected
k141_1387542_length_2771_cov_225.0000	lytic	low quality draft	5	0	0	0	0	4	10.68	2771	NA	5	5	0	Low-quality	6.25	AAI-based (medium-confidence)	0
k141_138818_length_8255_cov_53.4243	lytic	low quality draft	11	2	3.28	1	1.65	4	14.16	8255	NA	11	3	0	Low-quality	2.2	AAI-based (medium-confidence)	0
k141_1388263_length_1972_cov_20.0000	lytic	low quality draft	5	0	0	1	1.01	4	23.53	1972	NA	5	4	0	Low-quality	3.01	HMM-based (lower-bound)	0
k141_138831_length_15172_cov_387.0000	lytic	low quality draft	26	1	0.29	2	1.16	5	10.62	15172	NA	26	2	0	Low-quality	6.05	HMM-based (lower-bound)	0
k141_1388671_length_1862_cov_4075.0639	lytic	low quality draft	4	0	0	1	2.53	1	10	1862	NA	4	1	0	Low-quality	3.68	AAI-based (medium-confidence)	0
k141_1388739_length_8497_cov_57.0000	lytic	low quality draft	11	0	0	1	2.88	1	10	8497	NA	11	2	0	Low-quality	15.99	AAI-based (medium-confidence)	0
k141_1388745_length_15386_cov_191.0000	lytic	low quality draft	20	1	0.74	2	4.46	6	22.68	15386	NA	20	4	0	Low-quality	30.53	AAI-based (medium-confidence)	0
k141_1388990_length_1212_cov_1101.0000	lytic	low quality draft	5	0	0	0	0	1	3.77	1212	NA	5	1	0	Low-quality	2.69	AAI-based (medium-confidence)	0
k141_1389240_length_12232_cov_800.5007	lytic	low quality draft	15	1	4.5	2	2	6	17.48	12232	NA	15	6	0	Low-quality	24.15	AAI-based (medium-confidence)	0
k141_1389243_length_2134_cov_73.0000	lytic	low quality draft	4	0	0	0	0	1	0.07	2134	NA	4	0	0	Not-determined	NA	NA	0	no viral genes detected
k141_1390536_length_1074_cov_26.0000	lytic	low quality draft	4	0	0	0	0	3	5.51	1074	NA	4	3	0	Low-quality	1.96	AAI-based (high-confidence)	0
k141_1390760_length_1883_cov_1665.0000	lytic	low quality draft	4	1	2.88	0	0	2	10.07	1883	NA	4	0	0	Low-quality	3.72	AAI-based (high-confidence)	0	no viral genes detected
k141_1391174_length_1737_cov_21.0000	lytic	low quality draft	4	1	0.65	2	1.02	2	4.25	1737	NA	4	3	0	Low-quality	0.62	HMM-based (lower-bound)	0
k141_1391986_length_1737_cov_11.0000	lytic	low quality draft	4	0	0	1	0.31	3	9.51	1737	NA	4	3	0	Low-quality	3.9	AAI-based (high-confidence)	0
k141_1392015_length_4190_cov_184.5621	lytic	low quality draft	10	0	0	3	1.95	2	8.58	4190	NA	10	1	0	Low-quality	2.82	HMM-based (lower-bound)	0
k141_1392028_length_1464_cov_1855.0000	lytic	low quality draft	5	0	0	0	0	2	10.22	1464	NA	5	2	0	Low-quality	1.72	HMM-based (lower-bound)	0
k141_1392121_length_1412_cov_702.8883	lytic	low quality draft	5	0	0	0	0	1	0.3	1412	NA	5	0	0	Low-quality	0.34	AAI-based (medium-confidence)	0	no viral genes detected
k141_1392408_length_1786_cov_688.0000	lytic	low quality draft	5	0	0	1	1	1	1.24	1786	NA	5	2	0	Low-quality	1.93	HMM-based (lower-bound)	0
k141_1393393_length_19064_cov_215.0000	lytic	high quality draft	25	4	7.74	7	10.03	14	71.03	19064	NA	25	11	0	Low-quality	45.42	AAI-based (high-confidence)	0
k141_1394008_length_1750_cov_476.0000	lytic	low quality draft	4	0	0	0	0	2	12.74	1750	NA	4	3	0	Low-quality	3.64	AAI-based (medium-confidence)	0
k141_1394362_length_1381_cov_17.0000	lytic	low quality draft	4	0	0	1	1	2	6.18	1381	NA	4	4	0	Low-quality	3.19	AAI-based (medium-confidence)	0
k141_1394525_length_4018_cov_396.2538	lytic	low quality draft	8	1	0.12	1	0.16	1	0.47	4018	NA	8	0	0	Not-determined	NA	NA	0	no viral genes detected
k141_1395318_length_2493_cov_3476.4396	lytic	low quality draft	4	0	0	2	0.24	3	11.65	2493	NA	4	3	0	Low-quality	6.61	AAI-based (medium-confidence)	0
k141_1395319_length_3289_cov_444.0000	lytic	low quality draft	5	1	2.41	2	6.95	2	20	3289	NA	5	3	0	Low-quality	4.44	HMM-based (lower-bound)	0
k141_13960_length_3699_cov_609.0000	lytic	low quality draft	4	1	4.5	1	2.85	2	11	3699	NA	4	3	0	Low-quality	7.17	AAI-based (high-confidence)	0
k141_1396146_length_2065_cov_975.0000	lytic	low quality draft	5	0	0	1	1.68	2	6.21	2065	NA	5	2	0	Low-quality	3.7	AAI-based (medium-confidence)	0
k141_1396233_length_1361_cov_1165.0000	lytic	low quality draft	5	0	0	0	0	1	1	1361	NA	5	1	0	Low-quality	2.97	AAI-based (medium-confidence)	0
k141_139659_length_35151_cov_821.8672	lytic	medium quality draft	35	6	11.42	8	10.62	21	129.86	35151	NA	34	19	2	Low-quality	8.86	AAI-based (medium-confidence)	0
k141_1396796_length_1640_cov_957.0000	lytic	low quality draft	4	1	4.48	1	3.03	2	15.39	1640	NA	4	2	0	Low-quality	0.78	HMM-based (lower-bound)	0
k141_1397059_length_3910_cov_1053.0000	lytic	low quality draft	7	0	0	4	5.52	4	20.13	3910	NA	7	4	0	Low-quality	11.48	AAI-based (high-confidence)	0
k141_1397232_length_2215_cov_473.0000	lytic	low quality draft	4	0	0	0	0	1	10	2215	NA	4	1	0	Low-quality	1.84	AAI-based (medium-confidence)	0
k141_1397910_length_2541_cov_549.0000	lytic	low quality draft	4	0	0	3	3	2	3.41	2541	NA	4	2	0	Low-quality	7.3	AAI-based (high-confidence)	0
k141_1398087_length_1123_cov_90.0000	lytic	low quality draft	5	0	0	0	0	1	2.47	1123	NA	5	0	0	Low-quality	2	AAI-based (medium-confidence)	0	no viral genes detected
k141_1398830_length_2479_cov_428.4893	lytic	low quality draft	4	1	2.76	0	0	3	20.68	2479	NA	4	2	1	Low-quality	0.88	AAI-based (medium-confidence)	0
k141_1399649_length_2421_cov_1774.0000	lytic	low quality draft	6	0	0	0	0	1	0.86	2421	NA	6	0	0	Not-determined	NA	NA	0	no viral genes detected
k141_1399902_length_3228_cov_26.0000	lytic	low quality draft	5	1	4.48	1	3.03	3	20.16	3228	NA	5	3	0	Low-quality	1.02	HMM-based (lower-bound)	0
k141_1400208_length_3591_cov_50.0000	lytic	low quality draft	9	0	0	1	0.73	2	0.36	3591	NA	9	1	0	Low-quality	1.36	HMM-based (lower-bound)	0
k141_1400215_length_3977_cov_137.0000	lytic	low quality draft	7	0	0	3	3.18	6	25.8	3977	NA	7	7	0	Low-quality	6.01	HMM-based (lower-bound)	0
k141_1400542_length_1627_cov_1361.5101	lytic	low quality draft	5	0	0	0	0	1	10	1627	NA	5	2	0	Low-quality	3.43	AAI-based (high-confidence)	0
k141_14008_length_7057_cov_1262.6896	lytic	low quality draft	6	0	0	2	7.78	2	7.02	7057	NA	6	3	0	Low-quality	13.35	HMM-based (lower-bound)	0
k141_1401403_length_2315_cov_625.0000	lytic	low quality draft	4	0	0	1	0.18	1	0.95	2315	NA	3	1	0	Low-quality	1.2	AAI-based (medium-confidence)	0
k141_1401529_length_1022_cov_600.2259	lytic	low quality draft	4	0	0	0	0	1	4.86	1022	NA	3	1	0	Low-quality	0.35	HMM-based (lower-bound)	0
k141_140156_length_2617_cov_846.0000	lytic	low quality draft	4	0	0	1	2.88	1	10	2617	NA	4	2	0	Low-quality	4.85	AAI-based (high-confidence)	0
k141_1402142_length_3057_cov_177.0000	lysogenic	low quality draft	6	1	7	1	9.33	2	13.11	3057	NA	6	1	0	Low-quality	5.82	AAI-based (high-confidence)	0
k141_1402320_length_2747_cov_394.0000	lytic	low quality draft	6	0	0	0	0	2	1.33	2747	NA	6	2	0	Low-quality	1.07	HMM-based (lower-bound)	0
k141_1402355_length_2668_cov_771.0000	lytic	low quality draft	7	0	0	4	7.25	4	9.26	2668	NA	7	4	0	Low-quality	5.82	AAI-based (medium-confidence)	0
k141_1402370_length_2232_cov_476.0000	lytic	low quality draft	4	1	4.34	3	7.82	4	21.14	2232	NA	4	2	0	Low-quality	5.79	AAI-based (medium-confidence)	0
k141_1403128_length_3293_cov_291.8756	lytic	low quality draft	6	1	1.37	1	0.46	1	3.83	3293	NA	7	0	0	Not-determined	NA	NA	0	no viral genes detected
k141_1403420_length_1174_cov_1857.0000	lytic	low quality draft	4	0	0	0	0	1	0.34	1174	NA	4	1	0	Low-quality	2.74	AAI-based (medium-confidence)	0
k141_1403589_length_2603_cov_550.0000	lytic	low quality draft	5	0	0	2	3.81	3	25.99	2603	NA	5	4	0	Low-quality	5.23	AAI-based (high-confidence)	0
k141_1404444_length_3310_cov_321.4014	lytic	low quality draft	7	1	2.88	0	0	1	10	3310	NA	7	0	0	Not-determined	NA	NA	0	no viral genes detected
k141_1404503_length_8474_cov_117.0000	lytic	low quality draft	5	0	0	0	0	5	2.5	8474	NA	5	3	0	Low-quality	19.49	AAI-based (high-confidence)	0
k141_1404664_length_2090_cov_861.0000	lytic	low quality draft	4	1	4.48	1	3.03	2	15.39	2090	NA	4	2	0	Low-quality	2.86	AAI-based (medium-confidence)	0
k141_140476_length_1594_cov_247.0000	lytic	low quality draft	4	0	0	0	0	2	19.01	1594	NA	4	3	0	Low-quality	3.25	AAI-based (medium-confidence)	0
k141_1404881_length_3359_cov_16.0000	lytic	low quality draft	5	0	0	1	1.25	5	12.98	3359	NA	5	5	0	Low-quality	6.03	HMM-based (lower-bound)	0
k141_1405168_length_2848_cov_771.0000	lytic	low quality draft	4	0	0	0	0	2	1.75	2848	NA	4	2	0	Low-quality	3.61	AAI-based (medium-confidence)	0
k141_1405813_length_4255_cov_28.0000	lytic	low quality draft	8	2	3.81	1	1.1	2	7.05	4255	NA	8	1	0	Low-quality	3.99	HMM-based (lower-bound)	0
k141_1406353_length_1556_cov_196.0000	lytic	low quality draft	4	0	0	0	0	1	1.09	1556	NA	4	1	0	Low-quality	2.65	HMM-based (lower-bound)	0
k141_1407008_length_3116_cov_359.2669	lysogenic	low quality draft	6	1	7	0	0	1	10	3116	NA	6	0	0	Low-quality	4.47	AAI-based (medium-confidence)	0	no viral genes detected
k141_1407152_length_6503_cov_265.0000	lytic	low quality draft	9	0	0	1	1.25	9	31.66	6503	NA	9	9	0	Low-quality	15	AAI-based (medium-confidence)	0
k141_1407283_length_3278_cov_34.0000	lytic	low quality draft	7	2	7.08	3	7.79	6	17.99	3278	NA	7	5	0	Low-quality	7.58	AAI-based (high-confidence)	0
k141_1407640_length_4457_cov_48.0000	lytic	low quality draft	5	0	0	1	2.88	2	20	4457	NA	5	2	0	Low-quality	4.75	AAI-based (medium-confidence)	0
k141_1408483_length_4612_cov_833.0000	lytic	low quality draft	6	2	4.83	3	5.19	2	10.07	4612	NA	6	0	0	Low-quality	7.48	AAI-based (high-confidence)	0	no viral genes detected
k141_1408569_length_73165_cov_247.4647	lysogenic	low quality draft	95	26	48.29	50	71.2	56	234.35	73165	NA	95	55	4	High-quality	100	AAI-based (high-confidence)	0	contig >1.5x longer than expected genome length
k141_1409069_length_3825_cov_460.0000	lytic	low quality draft	6	0	0	1	2.7	1	10	3825	NA	6	1	0	Low-quality	7.76	AAI-based (high-confidence)	0
k141_1409187_length_4176_cov_254.0354	lytic	low quality draft	11	1	4.3	0	0	1	10	4176	NA	11	1	0	Low-quality	6.65	HMM-based (lower-bound)	0
k141_1409341_length_1551_cov_266.0000	lytic	low quality draft	4	0	0	0	0	1	10	1551	NA	4	0	0	Low-quality	4.1	AAI-based (high-confidence)	0	no viral genes detected
k141_1409440_length_3696_cov_401.0000	lytic	low quality draft	8	0	0	0	0	1	1.45	3696	NA	8	1	0	Low-quality	1.71	HMM-based (lower-bound)	0
k141_1410193_length_2658_cov_1738.6575	lytic	low quality draft	6	1	3.84	1	3.77	2	10.39	2658	NA	6	1	0	Low-quality	2.67	AAI-based (medium-confidence)	0
k141_1410245_length_2184_cov_20.0000	lytic	low quality draft	4	0	0	2	1.34	2	13.98	2184	NA	4	3	0	Low-quality	4.84	AAI-based (high-confidence)	0
k141_1410618_length_1339_cov_12.0000	lytic	low quality draft	4	0	0	1	1	2	3.38	1339	NA	4	2	0	Low-quality	3.05	AAI-based (high-confidence)	0
k141_1410955_length_3059_cov_1127.0446	lytic	low quality draft	7	2	3.54	2	1.68	2	20	3059	NA	7	0	0	Not-determined	NA	NA	0	no viral genes detected
k141_1411193_length_4351_cov_23.0000	lytic	low quality draft	6	0	0	0	0	1	2.87	4351	NA	6	3	0	Low-quality	10.19	AAI-based (medium-confidence)	0
k141_1411376_length_3025_cov_320.0180	lytic	low quality draft	4	0	0	2	0.37	2	7.3	3025	NA	4	0	0	Not-determined	NA	NA	0	no viral genes detected
k141_1411671_length_8286_cov_36.0000	lytic	low quality draft	10	1	0.89	8	7.76	9	28.31	8286	NA	10	6	0	Low-quality	18.17	AAI-based (high-confidence)	0
k141_1412053_length_7677_cov_157.0000	lytic	low quality draft	6	1	2.79	1	1.61	1	10	7677	NA	6	0	0	Not-determined	NA	NA	0	no viral genes detected
k141_1412062_length_2810_cov_127.0000	lytic	low quality draft	4	1	0.89	3	2.54	4	14.33	2810	NA	4	4	0	Low-quality	6.23	AAI-based (high-confidence)	0
k141_1412324_length_5265_cov_499.0170	lytic	low quality draft	8	1	1.85	0	0	1	0.58	5265	NA	8	1	0	Low-quality	6.09	HMM-based (lower-bound)	0
k141_1413558_length_3168_cov_506.0000	lytic	low quality draft	4	0	0	1	0.02	1	3.01	3168	NA	4	0	0	Not-determined	NA	NA	0	no viral genes detected
k141_1413591_length_98371_cov_173.0000_fragment_1	lysogenic	medium quality draft	50	6	18.88	17	40.42	29	148.42	33886	NA	48	26	1	Medium-quality	86.46	AAI-based (high-confidence)	0
k141_1413707_length_2529_cov_1568.0000	lytic	low quality draft	4	0	0	0	0	1	6.28	2529	NA	4	1	0	Low-quality	2.85	HMM-based (lower-bound)	0
k141_1414192_length_2425_cov_100.0000	lytic	low quality draft	6	0	0	0	0	1	10	2425	NA	6	1	0	Low-quality	4.81	AAI-based (medium-confidence)	0
k141_1414218_length_2234_cov_49.0000	lytic	low quality draft	4	0	0	2	7.79	2	8.79	2234	NA	4	2	0	Low-quality	2.53	HMM-based (lower-bound)	0
k141_1414772_length_1244_cov_551.0000	lytic	low quality draft	4	0	0	1	1.71	1	10	1244	NA	4	1	0	Low-quality	1.55	AAI-based (medium-confidence)	0
k141_1415110_length_2381_cov_1512.6964	lytic	low quality draft	4	1	2.41	1	5.99	2	10.06	2381	NA	6	0	0	Not-determined	NA	NA	0	no viral genes detected
k141_1415436_length_4307_cov_608.8812	lytic	low quality draft	7	1	1.23	1	1.24	4	4.2	4307	NA	7	2	0	Low-quality	10.8	AAI-based (high-confidence)	0
k141_1416006_length_1427_cov_388.0482	lytic	low quality draft	4	1	1.61	1	2.53	2	20	1427	NA	4	1	0	Low-quality	3.11	AAI-based (high-confidence)	0
k141_1416193_length_1592_cov_974.0000	lytic	low quality draft	5	0	0	0	0	1	10	1592	NA	6	1	0	Low-quality	2.42	HMM-based (lower-bound)	0
k141_1416714_length_4165_cov_31.0000	lytic	low quality draft	4	0	0	0	0	2	0.53	4165	NA	4	1	0	Low-quality	1.58	HMM-based (lower-bound)	0
k141_1416909_length_6856_cov_569.0000	lytic	low quality draft	11	2	3.74	3	5.75	2	14.28	6856	NA	11	1	0	Low-quality	3.64	HMM-based (lower-bound)	0
k141_1417108_length_7388_cov_113.0000	lytic	low quality draft	15	4	6.06	5	8.54	10	43.62	7388	NA	14	4	0	Low-quality	1.88	AAI-based (medium-confidence)	0
k141_1417261_length_62159_cov_452.2129_fragment_1	lysogenic	medium quality draft	58	8	14.39	12	21.9	22	66.11	44276	43160	58	14	2	High-quality	100	AAI-based (high-confidence)	2.52
k141_1417379_length_5803_cov_772.9961	lytic	low quality draft	7	0	0	1	0.47	2	1.18	5803	NA	7	3	0	Low-quality	11.26	HMM-based (lower-bound)	0
k141_1417745_length_5960_cov_389.8063	lytic	low quality draft	11	0	0	2	2.22	6	19.72	5960	NA	11	9	0	Low-quality	10.05	HMM-based (lower-bound)	0
k141_1417997_length_4814_cov_183.0000	lytic	low quality draft	6	1	1.37	2	0.92	2	4.66	4814	NA	6	0	0	Not-determined	NA	NA	0	no viral genes detected
k141_1418011_length_7031_cov_364.0000	lytic	low quality draft	5	0	0	1	0.39	1	0	7031	NA	5	0	0	Not-determined	NA	NA	0	no viral genes detected
k141_1418340_length_1280_cov_198.0000	lytic	low quality draft	5	0	0	0	0	1	2.74	1280	NA	5	1	0	Low-quality	2.7	AAI-based (medium-confidence)	0
k141_141840_length_2230_cov_302.0000	lytic	low quality draft	4	0	0	0	0	1	7.73	2230	NA	4	1	0	Low-quality	2.46	HMM-based (lower-bound)	0
k141_1418447_length_3927_cov_399.6410	lytic	low quality draft	9	1	0.12	1	1.13	1	5.22	3927	NA	9	0	0	Not-determined	NA	NA	0	no viral genes detected
k141_1418591_length_1379_cov_269.0000	lytic	low quality draft	5	1	2.63	4	2.89	3	14.93	1379	NA	5	2	0	Low-quality	3.95	AAI-based (high-confidence)	0
k141_1418637_length_3342_cov_650.0000	lytic	low quality draft	5	0	0	0	0	1	0.31	3342	NA	5	2	0	Low-quality	1.26	HMM-based (lower-bound)	0
k141_1418900_length_1483_cov_1514.0000	lytic	low quality draft	4	0	0	1	0.97	3	6.94	1483	NA	4	4	0	Low-quality	2.96	AAI-based (medium-confidence)	0
k141_1418909_length_6954_cov_437.0000	lytic	low quality draft	13	1	0.41	1	0.39	3	15.33	6954	NA	13	1	0	Low-quality	5.1	HMM-based (lower-bound)	0
k141_1418915_length_2508_cov_333.0000	lytic	low quality draft	8	2	5.49	3	2.12	6	22.51	2508	NA	8	2	0	Low-quality	5.71	AAI-based (high-confidence)	0
k141_1419467_length_12452_cov_651.3210	lytic	low quality draft	21	1	1.01	1	1.18	4	5.98	12452	NA	21	3	0	Low-quality	8.58	HMM-based (lower-bound)	0
k141_1419512_length_3187_cov_213.9402	lytic	low quality draft	5	0	0	0	0	2	20	3187	NA	5	2	0	Low-quality	1.66	AAI-based (medium-confidence)	0
k141_1419682_length_4637_cov_812.4484	lytic	low quality draft	5	0	0	1	2.88	1	10	4637	NA	5	2	0	Low-quality	5.58	HMM-based (lower-bound)	0
k141_142051_length_3868_cov_441.1626	lytic	low quality draft	6	0	0	1	2.87	2	10.63	3868	NA	6	2	0	Low-quality	9.65	AAI-based (medium-confidence)	0
k141_1421504_length_2809_cov_110.0000	lytic	low quality draft	8	0	0	0	0	1	0.34	2809	NA	8	1	0	Low-quality	0.64	HMM-based (lower-bound)	0
k141_142231_length_1728_cov_952.6900	lytic	low quality draft	4	0	0	0	0	1	3.08	1728	NA	4	1	0	Low-quality	2.42	AAI-based (medium-confidence)	0
k141_1422319_length_6558_cov_220.0000	lytic	low quality draft	7	1	0.03	2	2.91	3	20.07	6558	NA	7	2	0	Low-quality	12.37	AAI-based (high-confidence)	0
k141_142258_length_2425_cov_1343.0000	lytic	low quality draft	4	2	3.39	1	1	3	11.71	2425	NA	4	2	0	Low-quality	6.39	AAI-based (high-confidence)	0
k141_142277_length_6637_cov_676.0000	lytic	low quality draft	11	0	0	0	0	1	1.1	6637	NA	11	1	0	Low-quality	2.68	HMM-based (lower-bound)	0
k141_1423802_length_3035_cov_1331.0000	lytic	low quality draft	4	0	0	1	1	1	0.12	3035	NA	4	2	0	Low-quality	6.87	AAI-based (medium-confidence)	0
k141_1424071_length_1563_cov_888.0000	lytic	low quality draft	6	0	0	0	0	1	2.74	1563	NA	6	1	0	Low-quality	3.29	AAI-based (medium-confidence)	0
k141_1424308_length_5598_cov_488.0000	lytic	low quality draft	7	2	1.25	1	1.24	2	3.59	5598	NA	7	0	1	Not-determined	NA	NA	0	no viral genes detected
k141_1424436_length_2355_cov_1055.8812	lytic	low quality draft	4	0	0	1	1	2	10.12	2355	NA	4	1	0	Low-quality	4.7	AAI-based (high-confidence)	0
k141_1425532_length_3390_cov_52.0000	lytic	low quality draft	5	0	0	2	3.31	2	10.63	3390	NA	5	2	0	Low-quality	4.16	HMM-based (lower-bound)	0
k141_142563_length_3472_cov_37.0000	lytic	low quality draft	6	0	0	1	0.36	1	1.24	3472	NA	6	0	0	Not-determined	NA	NA	0	no viral genes detected
k141_142597_length_4176_cov_548.1636	lytic	low quality draft	11	0	0	0	0	1	0.4	4176	NA	11	2	0	Low-quality	6.32	HMM-based (lower-bound)	0
k141_1426047_length_8724_cov_78.0000	lytic	low quality draft	9	1	0.89	4	4.9	7	28.58	8724	NA	9	8	0	Low-quality	21.19	AAI-based (medium-confidence)	0
k141_1427837_length_3050_cov_1147.1849	lytic	low quality draft	4	0	0	2	0.19	1	0.95	3050	NA	3	0	1	Not-determined	NA	NA	0	no viral genes detected
k141_1428229_length_1313_cov_2109.0000	lytic	low quality draft	5	0	0	0	0	1	2.29	1313	NA	5	1	0	Low-quality	1.91	AAI-based (medium-confidence)	0
k141_1428330_length_1538_cov_431.9964	lytic	low quality draft	4	0	0	0	0	2	2.56	1538	NA	4	0	0	Low-quality	3.89	AAI-based (high-confidence)	0	no viral genes detected
k141_1428424_length_7956_cov_1149.4246	lytic	low quality draft	6	0	0	0	0	3	3.14	7956	NA	6	3	0	Low-quality	3.18	AAI-based (medium-confidence)	0
k141_1428530_length_3690_cov_912.5526	lytic	low quality draft	6	0	0	0	0	2	20	3690	NA	6	3	0	Low-quality	1.15	HMM-based (lower-bound)	0
k141_1428633_length_6128_cov_50.0000	lytic	low quality draft	14	0	0	2	2	5	3.78	6128	NA	15	1	0	Low-quality	5.51	HMM-based (lower-bound)	0
k141_1429572_length_4915_cov_162.0000	lytic	low quality draft	8	1	1.2	4	5.32	4	22.19	4915	NA	8	6	0	Low-quality	11.39	AAI-based (high-confidence)	0
k141_1429573_length_2541_cov_497.3033	lytic	low quality draft	4	0	0	0	0	3	0.77	2541	NA	4	2	0	Low-quality	6.37	AAI-based (medium-confidence)	0
k141_142963_length_1411_cov_2456.3874	lytic	low quality draft	6	0	0	0	0	1	10	1411	NA	6	1	0	Low-quality	2.61	AAI-based (medium-confidence)	0
k141_1429860_length_2797_cov_325.7861	lytic	low quality draft	5	0	0	0	0	2	0.44	2797	NA	5	1	0	Low-quality	0.68	AAI-based (medium-confidence)	0
k141_1430914_length_13120_cov_1178.3274	lysogenic	medium quality draft	22	8	16.03	10	25.71	18	68.91	13120	NA	22	11	1	Low-quality	32.54	AAI-based (high-confidence)	0
k141_1430933_length_3189_cov_2401.5098	lytic	low quality draft	5	1	1.23	0	0	2	20	3189	NA	3	1	0	Low-quality	1.1	HMM-based (lower-bound)	0
k141_1431187_length_3713_cov_22.0000	lytic	low quality draft	5	2	3.69	2	2.71	3	20.94	3713	NA	5	0	0	Not-determined	NA	NA	0	no viral genes detected
k141_1431394_length_1535_cov_152.8508	lytic	low quality draft	7	0	0	0	0	1	2.29	1535	NA	7	1	0	Low-quality	1.51	HMM-based (lower-bound)	0
k141_1431787_length_6176_cov_446.0000	lytic	low quality draft	9	0	0	2	1.35	4	26.83	6176	NA	9	3	0	Low-quality	12.3	HMM-based (lower-bound)	0
k141_1431904_length_6108_cov_401.6399	lytic	low quality draft	12	1	0.08	1	1.29	1	7.59	6108	NA	12	0	0	Not-determined	NA	NA	0	no viral genes detected
k141_1432706_length_3192_cov_373.0000	lytic	low quality draft	5	0	0	1	0.05	2	2.86	3192	NA	5	1	0	Low-quality	6.12	HMM-based (lower-bound)	0
k141_1432829_length_1850_cov_129.0000	lytic	low quality draft	4	0	0	1	0.93	2	5.06	1850	NA	4	1	0	Low-quality	1.66	HMM-based (lower-bound)	0
k141_1432840_length_1261_cov_226.0000	lytic	low quality draft	4	0	0	0	0	1	0.87	1261	379	4	1	1	Low-quality	0.11	HMM-based (lower-bound)	69.94
k141_1433017_length_17370_cov_237.1318	lytic	low quality draft	10	0	0	1	0.01	1	0.01	17370	NA	10	0	2	Not-determined	NA	NA	0	no viral genes detected
k141_1434236_length_3816_cov_46.5992	lytic	low quality draft	6	1	0.21	1	0.59	2	3.62	3816	NA	6	0	1	Low-quality	1.11	AAI-based (medium-confidence)	0	no viral genes detected
k141_1434395_length_2226_cov_149.0000	lytic	low quality draft	5	0	0	0	0	1	2.33	2226	NA	5	2	0	Low-quality	1.36	AAI-based (medium-confidence)	0
k141_1434688_length_4536_cov_9.0000	lytic	low quality draft	13	0	0	2	1.31	5	9.41	4536	NA	13	6	0	Low-quality	6.04	HMM-based (lower-bound)	0
k141_143480_length_1778_cov_171.0000	lytic	low quality draft	4	0	0	0	0	2	14.57	1778	NA	4	1	0	Low-quality	0.75	HMM-based (lower-bound)	0
k141_1434826_length_4759_cov_115.6154	lytic	low quality draft	6	1	1.03	0	0	5	21.26	4759	NA	6	6	0	Low-quality	1.32	HMM-based (lower-bound)	0
k141_1435103_length_9297_cov_101.0000	lytic	low quality draft	9	2	0.19	2	2.52	2	20	9297	NA	9	0	1	Not-determined	NA	NA	0	no viral genes detected
k141_1435343_length_6198_cov_101.0000	lytic	low quality draft	7	0	0	0	0	2	1.71	6198	NA	7	3	0	Low-quality	14.58	AAI-based (medium-confidence)	0
k141_1435591_length_3772_cov_606.8860	lytic	low quality draft	9	0	0	0	0	1	0.14	3772	NA	8	1	0	Low-quality	8.23	HMM-based (lower-bound)	0
k141_1435866_length_3985_cov_196.0000	lytic	low quality draft	6	1	3.7	1	4.63	3	29.33	3985	NA	6	1	0	Low-quality	1.08	AAI-based (medium-confidence)	0
k141_1436163_length_2364_cov_169.0000	lytic	low quality draft	5	0	0	1	7.58	1	10	2364	NA	5	1	0	Low-quality	5.37	AAI-based (high-confidence)	0
k141_1436429_length_32879_cov_525.4397	lytic	medium quality draft	26	7	8.89	8	10.14	17	71.27	32879	NA	26	10	0	Low-quality	8.16	AAI-based (medium-confidence)	0
k141_1436620_length_2994_cov_340.0000	lytic	low quality draft	4	2	3.39	3	4.17	3	11.69	2994	NA	4	3	0	Low-quality	7.54	AAI-based (high-confidence)	0
k141_1437297_length_1714_cov_9.0000	lytic	low quality draft	4	0	0	1	0.2	2	1.65	1714	NA	4	3	0	Low-quality	4.39	AAI-based (medium-confidence)	0
k141_1437643_length_1754_cov_188.0000	lytic	low quality draft	5	0	0	0	0	1	3.08	1754	NA	5	1	0	Low-quality	2.79	AAI-based (medium-confidence)	0
k141_1437999_length_9746_cov_70.0000	lytic	low quality draft	12	4	2.42	4	2.42	4	11.32	9746	NA	11	0	0	Low-quality	4.2	AAI-based (medium-confidence)	0	no viral genes detected
k141_1439553_length_3111_cov_276.0000	lytic	low quality draft	5	1	4.3	1	4.14	3	15.93	3111	NA	5	2	0	Low-quality	5.25	AAI-based (medium-confidence)	0
k141_1440835_length_2250_cov_123.0000	lytic	low quality draft	5	0	0	3	3.65	4	26.77	2250	NA	5	4	0	Low-quality	5.47	AAI-based (high-confidence)	0
k141_1441196_length_7923_cov_31.0000	lytic	low quality draft	22	1	1.33	1	1.25	2	6.99	7923	NA	20	1	0	Low-quality	2.29	HMM-based (lower-bound)	0
k141_1441368_length_9715_cov_460.0000	lytic	low quality draft	12	1	2.41	6	20.55	8	43.94	9715	NA	13	11	0	Low-quality	25.05	AAI-based (medium-confidence)	0
k141_1441720_length_7557_cov_381.0291	lytic	low quality draft	9	0	0	0	0	1	1.01	7557	NA	9	2	0	Low-quality	2.62	HMM-based (lower-bound)	0
k141_1442195_length_1276_cov_8.0000	lytic	low quality draft	5	0	0	1	7.58	2	1.08	1276	NA	5	1	0	Not-determined	NA	NA	0
k141_1442616_length_7683_cov_145.0000	lytic	low quality draft	8	2	0.34	2	0.83	2	4.18	7683	NA	8	1	0	Low-quality	5.15	HMM-based (lower-bound)	0
k141_1444057_length_3875_cov_871.2973	lytic	low quality draft	8	0	0	0	0	1	0.06	3875	NA	8	2	0	Low-quality	7.28	AAI-based (high-confidence)	0
k141_1444863_length_5891_cov_1525.0000	lytic	low quality draft	10	0	0	1	1.17	3	11.06	5891	NA	10	4	0	Low-quality	11.78	AAI-based (high-confidence)	0
k141_144554_length_13909_cov_205.0000	lytic	low quality draft	20	3	1.67	5	3.45	8	23.09	13909	NA	20	3	0	Low-quality	3.74	AAI-based (medium-confidence)	0
k141_1445715_length_1785_cov_1757.0000	lytic	low quality draft	5	0	0	1	0.09	2	2.23	1785	NA	5	3	0	Low-quality	4.17	AAI-based (medium-confidence)	0
k141_1445730_length_5709_cov_75.0000	lytic	low quality draft	7	2	4.49	2	3.03	4	30.1	5709	NA	7	4	0	Low-quality	1.38	AAI-based (medium-confidence)	0
k141_1446010_length_2432_cov_321.0000	lytic	low quality draft	6	0	0	0	0	1	0.18	2432	NA	6	0	0	Not-determined	NA	NA	0	no viral genes detected
k141_1446513_length_2847_cov_227.0000	lytic	low quality draft	4	0	0	0	0	2	2.09	2847	NA	4	3	0	Low-quality	0.96	HMM-based (lower-bound)	0
k141_1447092_length_3053_cov_433.0000	lytic	low quality draft	4	0	0	1	0.39	1	0	3053	NA	4	0	0	Not-determined	NA	NA	0	no viral genes detected
k141_1447294_length_9894_cov_14.0000	lytic	low quality draft	13	0	0	5	13.26	6	60	9894	NA	13	10	0	Low-quality	19.79	AAI-based (medium-confidence)	0
k141_1447398_length_3521_cov_116.0000	lytic	low quality draft	7	2	2.32	2	6.19	3	3.33	3521	NA	7	3	0	Low-quality	8.69	AAI-based (high-confidence)	0
k141_1447536_length_2339_cov_1023.0000	lytic	low quality draft	4	0	0	0	0	4	3.51	2339	NA	4	4	0	Low-quality	3.9	AAI-based (high-confidence)	0
k141_1447628_length_3116_cov_317.0000	lytic	low quality draft	5	2	4.32	1	5.1	3	6.87	3116	NA	5	0	0	Low-quality	4.41	AAI-based (medium-confidence)	0	no viral genes detected
k141_1447630_length_4699_cov_661.9386	lytic	low quality draft	8	0	0	1	0.97	6	19.82	4699	NA	8	7	0	Low-quality	8.05	HMM-based (lower-bound)	0
k141_1447859_length_6365_cov_546.0000	lytic	low quality draft	14	2	1.56	2	1.53	2	8.55	6365	NA	14	0	0	Not-determined	NA	NA	0	no viral genes detected
k141_1448017_length_5519_cov_183.0242	lytic	low quality draft	7	0	0	0	0	2	8.77	5519	NA	7	3	0	Low-quality	5.88	AAI-based (medium-confidence)	0
k141_1448688_length_7547_cov_2822.7734	lytic	low quality draft	5	2	0.5	3	9.81	3	20.07	7547	NA	5	0	0	Low-quality	7.94	AAI-based (medium-confidence)	0	no viral genes detected
k141_144885_length_2676_cov_556.8146	lytic	low quality draft	5	1	2.41	3	7.95	3	27.11	2676	NA	5	4	0	Low-quality	6.3	AAI-based (high-confidence)	0
k141_1448904_length_1358_cov_604.0000	lytic	low quality draft	4	0	0	0	0	1	0.39	1358	NA	4	1	0	Low-quality	2.54	AAI-based (high-confidence)	0
k141_1448944_length_3040_cov_196.0000	lytic	low quality draft	4	0	0	2	4.02	2	11.3	3040	NA	4	3	0	Low-quality	8.74	AAI-based (high-confidence)	0
k141_1449163_length_2363_cov_223.0000	lytic	low quality draft	4	0	0	0	0	1	10	2363	NA	3	1	0	Low-quality	4.46	AAI-based (medium-confidence)	0
k141_1449199_length_2200_cov_10.0000	lytic	low quality draft	4	0	0	2	3.81	3	19.31	2200	NA	4	2	0	Low-quality	4.45	AAI-based (medium-confidence)	0
k141_1449991_length_8367_cov_305.0000	lytic	low quality draft	8	1	1.48	2	1.46	1	8.24	8367	NA	8	0	0	Not-determined	NA	NA	0	no viral genes detected
k141_1450073_length_1794_cov_881.0000	lytic	low quality draft	4	0	0	0	0	1	1.52	1794	NA	4	1	0	Low-quality	4.39	AAI-based (medium-confidence)	0
k141_1450292_length_2732_cov_669.0000	lytic	low quality draft	4	0	0	1	1.99	1	10	2732	NA	4	2	0	Low-quality	6.43	AAI-based (high-confidence)	0
k141_1451614_length_12491_cov_402.1758	lytic	low quality draft	18	2	2.86	3	3.11	6	19.7	12491	NA	17	2	0	Low-quality	2.58	AAI-based (medium-confidence)	0
k141_1452117_length_9766_cov_260.7634	lytic	low quality draft	8	4	5.68	3	2.63	5	41.01	9766	NA	8	0	0	Low-quality	6.44	AAI-based (medium-confidence)	0	no viral genes detected
k141_1452229_length_4386_cov_67.0000	lytic	low quality draft	8	0	0	4	5.36	4	12.55	4386	NA	8	4	0	Low-quality	9.73	AAI-based (medium-confidence)	0
k141_1452686_length_2811_cov_23.0000	lytic	low quality draft	7	0	0	0	0	2	3.22	2811	NA	7	3	0	Low-quality	3.93	HMM-based (lower-bound)	0
k141_1452946_length_1911_cov_1149.0000	lytic	low quality draft	5	1	0.58	1	0.18	2	4.24	1911	NA	4	1	0	Low-quality	0.98	HMM-based (lower-bound)	0
k141_1453656_length_6034_cov_95.1125	lytic	low quality draft	8	1	3.7	1	4.63	4	29.65	6034	NA	8	3	0	Low-quality	1.62	AAI-based (medium-confidence)	0
k141_1454880_length_2610_cov_480.1227	lytic	low quality draft	4	1	0.07	1	0.11	2	10.11	2610	1697	4	1	1	Low-quality	1.07	HMM-based (lower-bound)	34.98
k141_1455445_length_1588_cov_15.0000	lytic	low quality draft	4	0	0	0	0	2	0.11	1588	NA	4	1	0	Low-quality	1.47	AAI-based (medium-confidence)	0
k141_1455794_length_1325_cov_771.4155	lytic	low quality draft	4	2	6.6	3	7.83	3	20.4	1325	NA	4	0	0	Low-quality	2.84	AAI-based (medium-confidence)	0	no viral genes detected
k141_1456000_length_4670_cov_411.7399	lytic	low quality draft	6	2	5.99	2	3.85	4	19.99	4670	NA	6	3	0	Low-quality	9.32	AAI-based (medium-confidence)	0
k141_1456012_length_3422_cov_389.7717	lytic	low quality draft	5	0	0	1	1.68	2	7.75	3422	NA	5	1	0	Low-quality	2.3	HMM-based (lower-bound)	0
k141_1456025_length_1414_cov_32.0000	lytic	low quality draft	4	1	4.34	2	5.93	3	17.54	1414	NA	4	2	0	Low-quality	3.03	AAI-based (medium-confidence)	0
k141_1456116_length_14158_cov_63.1298	lytic	low quality draft	20	3	7.19	7	10.42	15	57.96	14158	NA	20	16	0	Low-quality	25.42	AAI-based (medium-confidence)	0
k141_1456624_length_19655_cov_278.5272	lytic	medium quality draft	31	4	13.24	18	26.82	19	73.16	19655	NA	31	17	0	Medium-quality	55.74	AAI-based (high-confidence)	0
k141_1456631_length_1697_cov_1124.8213	lytic	low quality draft	5	1	4.34	1	4.28	2	10.32	1697	NA	5	1	0	Low-quality	3.27	AAI-based (high-confidence)	0
k141_1457004_length_3529_cov_608.0000	lytic	low quality draft	9	0	0	1	0.04	2	3.73	3529	NA	9	1	0	Low-quality	1.5	HMM-based (lower-bound)	0
k141_1458350_length_1232_cov_839.0000	lytic	low quality draft	4	0	0	0	0	1	0.86	1232	NA	4	0	0	Low-quality	2.3	AAI-based (high-confidence)	0	no viral genes detected
k141_1458616_length_1963_cov_1063.2058	lytic	low quality draft	4	0	0	1	1	1	0.14	1963	NA	4	0	0	Low-quality	3.59	AAI-based (medium-confidence)	0	no viral genes detected
k141_1458772_length_5740_cov_567.0000	lytic	low quality draft	5	0	0	0	0	2	2.13	5740	NA	5	2	0	Low-quality	1.98	HMM-based (lower-bound)	0
k141_1458927_length_1912_cov_21.0000	lysogenic	low quality draft	5	0	0	2	9.46	2	0.6	1912	NA	5	0	0	Not-determined	NA	NA	0	no viral genes detected
k141_145900_length_2512_cov_20.0000	lytic	low quality draft	8	0	0	0	0	1	0.04	2512	NA	8	0	0	Not-determined	NA	NA	0	no viral genes detected
k141_1460113_length_4529_cov_1642.7767	lytic	low quality draft	7	3	4.3	3	4.47	3	24.97	4529	NA	7	0	1	Not-determined	NA	NA	0	no viral genes detected
k141_1460550_length_3543_cov_563.2892	lytic	low quality draft	5	1	1.2	1	1.17	4	11.68	3543	NA	5	4	0	Low-quality	6.09	AAI-based (medium-confidence)	0
k141_1460922_length_4520_cov_624.0253	lytic	low quality draft	5	0	0	1	1	1	3.45	4520	NA	5	3	0	Low-quality	6.33	HMM-based (lower-bound)	0
k141_1461137_length_2530_cov_494.5596	lytic	low quality draft	4	1	0.02	2	7.6	2	8.17	2530	951	4	1	1	Low-quality	0.61	HMM-based (lower-bound)	62.41
k141_1461465_length_4952_cov_160.0143	lytic	low quality draft	10	1	0.17	1	0.32	3	4.26	4952	NA	10	1	1	Low-quality	3.29	HMM-based (lower-bound)	0
k141_1462902_length_5244_cov_893.5900	lytic	low quality draft	8	0	0	2	2.22	2	10.09	5244	NA	8	1	0	Low-quality	3.39	HMM-based (lower-bound)	0
k141_1463127_length_5504_cov_23.0000	lytic	low quality draft	5	0	0	0	0	5	6.67	5504	NA	5	5	0	Low-quality	7.16	HMM-based (lower-bound)	0
k141_1464751_length_3078_cov_787.0000	lysogenic	low quality draft	6	1	7	2	9.68	2	14.29	3078	NA	6	0	0	Low-quality	6.55	AAI-based (medium-confidence)	0	no viral genes detected
k141_1464864_length_17899_cov_305.1073	lytic	low quality draft	17	1	0.93	2	0.11	5	12.9	17899	NA	17	6	0	Low-quality	7.37	HMM-based (lower-bound)	0
k141_1465174_length_6495_cov_273.0000	lytic	low quality draft	9	0	0	1	2.88	1	10	6495	NA	9	3	0	Low-quality	12.22	AAI-based (medium-confidence)	0
k141_1465229_length_3527_cov_1195.6973	lytic	low quality draft	9	0	0	0	0	2	5.45	3527	NA	9	2	0	Low-quality	1.96	HMM-based (lower-bound)	0
k141_1465271_length_4149_cov_58.0000	lytic	low quality draft	6	2	6.13	2	5.94	4	13.54	4149	NA	6	1	0	Low-quality	1.46	AAI-based (medium-confidence)	0
k141_1465607_length_2890_cov_388.0000	lytic	low quality draft	6	1	0.02	1	0.03	1	0.25	2890	1602	6	1	1	Low-quality	0.72	HMM-based (lower-bound)	44.57
k141_1465937_length_8343_cov_33.0000	lytic	low quality draft	6	1	2.34	1	2.85	5	30.45	8343	NA	6	4	0	Low-quality	2.27	AAI-based (high-confidence)	0
k141_1465938_length_2276_cov_1368.9044	lytic	low quality draft	8	1	2.79	1	2.5	1	10	2276	NA	8	0	0	Not-determined	NA	NA	0	no viral genes detected
k141_1466082_length_6253_cov_394.9967	lytic	low quality draft	10	1	2.63	1	2.58	1	10	6253	NA	10	0	0	Not-determined	NA	NA	0	no viral genes detected
k141_1466148_length_1220_cov_1030.0000	lytic	low quality draft	4	1	3.5	0	0	3	2.03	1220	NA	4	1	0	Low-quality	2.3	AAI-based (medium-confidence)	0
k141_1466565_length_2106_cov_35.0000	lytic	low quality draft	6	0	0	2	1.18	1	3.5	2106	NA	6	2	0	Low-quality	3.47	AAI-based (high-confidence)	0
k141_1466790_length_7540_cov_912.5416	lytic	low quality draft	12	0	0	2	3.81	5	28.02	7540	NA	12	7	0	Low-quality	11.85	HMM-based (lower-bound)	0
k141_1466869_length_3977_cov_874.9286	lytic	low quality draft	5	0	0	1	0.36	2	1.56	3977	NA	5	0	0	Not-determined	NA	NA	0	no viral genes detected
k141_1466964_length_2009_cov_412.0000	lytic	low quality draft	4	0	0	1	0.19	1	0.71	2009	NA	4	2	0	Low-quality	4.69	AAI-based (high-confidence)	0
k141_1467682_length_55959_cov_680.0000	lytic	medium quality draft	100	14	10.83	19	14.73	34	101.81	55959	NA	97	16	3	Low-quality	11.51	AAI-based (medium-confidence)	0
k141_1467706_length_7123_cov_42.0000	lytic	low quality draft	8	2	4.22	1	1.37	4	11.36	7123	NA	8	2	0	Low-quality	4.46	AAI-based (medium-confidence)	0
k141_1467954_length_5490_cov_308.9903	lytic	low quality draft	9	0	0	0	0	4	22.23	5490	NA	9	6	0	Low-quality	1.58	HMM-based (lower-bound)	0
k141_1468120_length_1689_cov_362.0000	lytic	low quality draft	5	0	0	0	0	1	0.59	1689	NA	5	1	0	Low-quality	0.76	HMM-based (lower-bound)	0
k141_1468261_length_3914_cov_935.9685	lytic	low quality draft	5	0	0	0	0	1	1	3914	NA	5	2	0	Low-quality	6.33	HMM-based (lower-bound)	0
k141_1468564_length_2010_cov_406.0000	lytic	low quality draft	4	1	0.58	1	0.18	2	3.56	2010	NA	4	1	0	Low-quality	0.9	HMM-based (lower-bound)	0
k141_146866_length_16592_cov_202.7461	lytic	low quality draft	20	0	0	2	1.22	2	3.86	16592	NA	20	1	1	Low-quality	32.83	AAI-based (medium-confidence)	0
k141_1468746_length_4372_cov_28.0000	lytic	low quality draft	6	0	0	1	0.25	2	2.02	4372	NA	6	2	0	Low-quality	3	AAI-based (medium-confidence)	0
k141_1468862_length_1562_cov_182.7481	lytic	low quality draft	5	0	0	0	0	1	6.53	1562	NA	4	3	0	Low-quality	3.78	AAI-based (high-confidence)	0
k141_1469034_length_5037_cov_1756.8713	lytic	low quality draft	7	1	0.03	1	0.03	1	0.86	5037	NA	7	0	0	Low-quality	9.94	AAI-based (medium-confidence)	0	no viral genes detected
k141_1469124_length_7089_cov_57.5332	lytic	low quality draft	8	3	3.8	5	8.93	7	14.09	7089	NA	8	4	0	Low-quality	17.35	AAI-based (medium-confidence)	0
k141_1469421_length_27974_cov_197.2450	lytic	low quality draft	32	10	17.66	16	34.93	14	119.75	27974	NA	32	10	0	Medium-quality	58.45	AAI-based (medium-confidence)	0
k141_1469911_length_1672_cov_10.0000	lytic	low quality draft	4	0	0	0	0	1	0.09	1672	NA	4	0	0	Not-determined	NA	NA	0	no viral genes detected
k141_1470233_length_2965_cov_681.0000	lytic	low quality draft	4	1	0.29	0	0	2	1.86	2965	NA	4	0	0	Not-determined	NA	NA	0	no viral genes detected
k141_1471134_length_2534_cov_126.0000	lytic	low quality draft	4	0	0	1	1	1	4.13	2534	NA	4	2	0	Low-quality	1.41	HMM-based (lower-bound)	0
k141_147178_length_2398_cov_910.9535	lytic	low quality draft	4	0	0	0	0	3	12.16	2398	NA	4	4	0	Low-quality	4.38	HMM-based (lower-bound)	0
k141_147195_length_6063_cov_941.8727	lytic	low quality draft	11	1	0.01	0	0	1	10	6063	NA	10	1	1	Low-quality	2.94	HMM-based (lower-bound)	0
k141_1471964_length_3977_cov_122.4940	lytic	low quality draft	4	1	4.5	3	7.56	4	14.57	3977	NA	5	5	0	Low-quality	9.67	AAI-based (high-confidence)	0
k141_1471969_length_3713_cov_97.0050	lytic	low quality draft	8	1	0.93	2	1.33	2	4.6	3713	NA	6	0	0	Not-determined	NA	NA	0	no viral genes detected
k141_1472265_length_2696_cov_1304.0000	lytic	low quality draft	5	1	0.51	1	0.42	2	2.86	2696	NA	5	0	0	Not-determined	NA	NA	0	no viral genes detected
k141_1472307_length_7093_cov_285.0012	lytic	low quality draft	7	0	0	1	0.77	3	10.38	7093	NA	7	4	0	Low-quality	9.15	HMM-based (lower-bound)	0
k141_1472403_length_2466_cov_32.0000	lytic	low quality draft	4	0	0	0	0	1	3.25	2466	NA	4	1	0	Low-quality	3.99	HMM-based (lower-bound)	0
k141_1472428_length_1287_cov_341.0000	lytic	low quality draft	5	0	0	0	0	2	11.4	1287	NA	5	1	0	Low-quality	1.79	AAI-based (medium-confidence)	0
k141_1473103_length_3245_cov_119.0000	lytic	low quality draft	4	1	1.49	2	2.62	2	15.63	3245	NA	4	2	0	Low-quality	6.76	AAI-based (medium-confidence)	0
k141_1473961_length_1183_cov_1229.0000	lytic	low quality draft	4	0	0	0	0	1	0.46	1183	NA	4	1	0	Low-quality	1.94	AAI-based (medium-confidence)	0
k141_147443_length_7184_cov_740.0097	lytic	low quality draft	13	1	0.31	2	2.42	6	7.37	7184	NA	12	5	0	Low-quality	2.16	HMM-based (lower-bound)	0
k141_1475331_length_1839_cov_11.0000	lytic	low quality draft	5	0	0	0	0	2	10.36	1839	NA	5	0	0	Not-determined	NA	NA	0	no viral genes detected
k141_1475751_length_3424_cov_314.6308	lytic	low quality draft	5	0	0	2	0.54	1	1.33	3424	NA	5	0	0	Low-quality	5.26	AAI-based (high-confidence)	0	no viral genes detected
k141_1475927_length_2125_cov_102.0000	lytic	low quality draft	4	0	0	2	6.52	2	11.98	2125	NA	4	3	0	Low-quality	4.62	AAI-based (high-confidence)	0
k141_1476182_length_1898_cov_405.0000	lytic	low quality draft	5	1	0.02	1	0.03	3	10.49	1898	NA	5	2	0	Low-quality	1.11	AAI-based (medium-confidence)	0
k141_1476389_length_3648_cov_623.0000	lytic	low quality draft	4	1	0.4	2	0.02	2	0.52	3648	NA	4	0	0	Low-quality	5.42	AAI-based (medium-confidence)	0	no viral genes detected
k141_1476971_length_3684_cov_31.0000	lytic	low quality draft	5	1	2.77	0	0	2	20	3684	NA	5	1	0	Low-quality	2.38	AAI-based (medium-confidence)	0
k141_1477858_length_3565_cov_1033.0000	lytic	low quality draft	6	0	0	0	0	3	7.53	3565	NA	6	4	0	Low-quality	9.9	HMM-based (lower-bound)	0
k141_1478081_length_12156_cov_189.0235	lytic	low quality draft	12	1	2.63	1	2.58	6	24.51	12156	NA	12	5	0	Low-quality	30.31	AAI-based (medium-confidence)	0
k141_1478275_length_4619_cov_1077.9142	lytic	low quality draft	8	0	0	0	0	1	1.66	4619	NA	8	0	0	Not-determined	NA	NA	0	no viral genes detected
k141_1479048_length_4380_cov_976.0000	lytic	low quality draft	10	1	2.36	7	7	8	12.8	4380	NA	10	8	0	Low-quality	11.51	AAI-based (high-confidence)	0
k141_1479535_length_1383_cov_765.0000	lytic	low quality draft	5	0	0	0	0	1	2.47	1383	NA	5	0	0	Not-determined	NA	NA	0	no viral genes detected
k141_1479922_length_3251_cov_33.0000	lytic	low quality draft	9	1	0.38	1	2.71	1	1.07	3251	NA	9	1	0	Low-quality	6.31	AAI-based (medium-confidence)	0
k141_1480149_length_6619_cov_310.0000	lytic	low quality draft	7	1	0.75	1	1.29	1	7.59	6619	NA	7	0	1	Not-determined	NA	NA	0	no viral genes detected
k141_1481046_length_1992_cov_17.0000	lytic	low quality draft	4	1	0.72	3	3.94	3	14.56	1992	NA	4	2	0	Low-quality	3.23	HMM-based (lower-bound)	0
k141_1481091_length_2151_cov_411.0000	lytic	low quality draft	8	1	2.79	0	0	1	10	2151	NA	8	0	0	Not-determined	NA	NA	0	no viral genes detected
k141_1481215_length_12242_cov_36.0000	lytic	low quality draft	16	1	1.24	4	8.71	11	26.37	12242	NA	16	12	0	Low-quality	29.15	AAI-based (medium-confidence)	0
k141_1482058_length_2008_cov_42.4312	lytic	low quality draft	4	0	0	2	7.65	1	10	2008	NA	4	2	0	Low-quality	4.56	AAI-based (high-confidence)	0
k141_1482146_length_1372_cov_72.0000	lytic	low quality draft	4	0	0	0	0	1	3.65	1372	NA	4	1	0	Low-quality	0.85	HMM-based (lower-bound)	0
k141_1482466_length_4757_cov_348.0000	lytic	low quality draft	4	1	0.04	2	2.89	2	11.3	4757	NA	4	2	0	Low-quality	13.66	AAI-based (high-confidence)	0
k141_1483786_length_1567_cov_434.0000	lytic	low quality draft	4	0	0	0	0	1	0.33	1567	NA	4	1	0	Low-quality	0.36	HMM-based (lower-bound)	0
k141_148421_length_6548_cov_514.0000	lytic	low quality draft	11	4	2.31	3	1.14	6	16.42	6548	NA	11	1	1	Low-quality	2.1	HMM-based (lower-bound)	0
k141_1484752_length_1978_cov_436.0000	lytic	low quality draft	6	2	5.29	2	7.34	2	20	1978	NA	6	0	0	Low-quality	4.59	AAI-based (medium-confidence)	0	no viral genes detected
k141_1484761_length_2636_cov_31.0000	lytic	low quality draft	5	0	0	2	3.04	2	11.33	2636	NA	5	2	0	Low-quality	5.08	AAI-based (medium-confidence)	0
k141_1485151_length_2001_cov_1023.0000	lytic	low quality draft	4	0	0	1	2.06	1	1.26	2001	NA	4	1	0	Low-quality	1.34	AAI-based (medium-confidence)	0
k141_1485430_length_4390_cov_585.0000	lytic	low quality draft	6	0	0	1	0.77	5	3.58	4390	NA	6	5	0	Low-quality	7.32	AAI-based (high-confidence)	0
k141_1487185_length_5083_cov_14.0000	lytic	low quality draft	10	2	2.94	4	5.36	6	19.72	5083	NA	10	6	0	Low-quality	13.15	AAI-based (medium-confidence)	0
k141_1488021_length_3205_cov_34.0000	lytic	low quality draft	4	1	0.07	1	0.06	2	0.2	3205	NA	4	0	0	Not-determined	NA	NA	0	no viral genes detected
k141_1488236_length_14280_cov_519.7607	lytic	low quality draft	11	3	11.72	4	13.75	4	27.54	14280	NA	11	0	0	Low-quality	32.07	AAI-based (medium-confidence)	0	no viral genes detected
k141_1488313_length_3879_cov_97.0000	lytic	low quality draft	12	0	0	1	0.45	1	4.79	3879	NA	12	0	0	Not-determined	NA	NA	0	no viral genes detected
k141_1488337_length_4917_cov_258.3275	lytic	low quality draft	9	1	2.08	0	0	1	10	4917	NA	9	0	1	Not-determined	NA	NA	0	no viral genes detected
k141_1488608_length_5389_cov_36.0000	lytic	low quality draft	7	2	2.18	2	2.72	5	27.76	5389	NA	7	4	0	Low-quality	12.01	AAI-based (high-confidence)	0
k141_1488645_length_2458_cov_552.9948	lytic	low quality draft	4	0	0	0	0	1	1.09	2458	NA	4	1	0	Low-quality	4.18	HMM-based (lower-bound)	0
k141_1488815_length_4593_cov_523.3131	lytic	low quality draft	11	1	0.03	2	0.28	2	10.38	4593	NA	11	2	1	Low-quality	1.39	HMM-based (lower-bound)	0
k141_148887_length_3445_cov_1350.0000	lytic	low quality draft	7	0	0	0	0	2	11.79	3445	NA	7	2	0	Low-quality	6.71	AAI-based (medium-confidence)	0
k141_1489303_length_3973_cov_1173.8105	lytic	low quality draft	5	1	1.37	1	0.78	3	5.76	3973	NA	5	2	0	Low-quality	1.08	HMM-based (lower-bound)	0
k141_1489305_length_4739_cov_135.0000	lysogenic	low quality draft	5	2	6.37	3	13.19	3	11.89	4739	NA	5	0	0	Low-quality	8.8	AAI-based (medium-confidence)	0	no viral genes detected
k141_148937_length_1405_cov_13.0000	lytic	low quality draft	4	0	0	0	0	2	1.53	1405	NA	4	3	0	Low-quality	2.06	HMM-based (lower-bound)	0
k141_1490329_length_4002_cov_47.0000	lytic	low quality draft	7	2	7.31	3	6.86	4	40	4002	NA	7	3	0	Low-quality	8.09	AAI-based (medium-confidence)	0
k141_1491524_length_2440_cov_27.0000	lytic	low quality draft	4	0	0	0	0	1	0.12	2440	NA	4	0	0	Not-determined	NA	NA	0	no viral genes detected
k141_149202_length_1382_cov_868.0000	lytic	low quality draft	7	0	0	0	0	1	10	1382	NA	7	1	0	Low-quality	2.1	HMM-based (lower-bound)	0
k141_1492275_length_7313_cov_30.0000	lytic	low quality draft	14	0	0	1	1.18	3	12.41	7313	NA	14	0	0	Not-determined	NA	NA	0	no viral genes detected
k141_1492442_length_1386_cov_859.0000	lytic	low quality draft	4	0	0	0	0	2	10.57	1386	NA	4	1	0	Low-quality	2.92	AAI-based (medium-confidence)	0
k141_1493222_length_1656_cov_31.0000	lytic	low quality draft	4	0	0	1	1.99	1	8.02	1656	NA	4	2	0	Low-quality	3.71	AAI-based (high-confidence)	0
k141_149380_length_1052_cov_94.0428	lytic	low quality draft	4	0	0	0	0	1	4.77	1052	NA	3	0	0	Not-determined	NA	NA	0	no viral genes detected
k141_1495143_length_1775_cov_1884.6224	lytic	low quality draft	5	0	0	1	1	1	9.01	1775	NA	5	1	0	Low-quality	4.53	AAI-based (medium-confidence)	0
k141_1495258_length_143103_cov_116.9008_fragment_2	lysogenic	low quality draft	9	2	3.1	3	7.17	4	33.24	5792	NA	9	1	0	Low-quality	7.78	HMM-based (lower-bound)	0
k141_1495775_length_1809_cov_466.0000	lytic	low quality draft	6	0	0	0	0	1	1.1	1809	NA	6	1	0	Low-quality	4.13	AAI-based (medium-confidence)	0
k141_1495824_length_1084_cov_464.0000	lytic	low quality draft	4	0	0	1	0.27	1	2.47	1084	NA	4	1	0	Low-quality	1.69	HMM-based (lower-bound)	0
k141_1495924_length_5184_cov_105.0000	lytic	low quality draft	8	1	2.24	1	2.02	6	19.2	5184	NA	8	5	0	Low-quality	10.95	AAI-based (medium-confidence)	0
k141_1495938_length_2498_cov_11.0000	lytic	low quality draft	6	0	0	1	1	2	3.52	2498	NA	4	2	0	Low-quality	4.36	AAI-based (medium-confidence)	0
k141_1496256_length_2816_cov_1739.0785	lytic	low quality draft	5	1	0.46	1	0.42	2	3.97	2816	NA	5	0	1	Not-determined	NA	NA	0	no viral genes detected
k141_1496715_length_6262_cov_20.0000	lytic	low quality draft	7	0	0	0	0	2	13.2	6262	NA	7	3	0	Low-quality	15.03	AAI-based (high-confidence)	0
k141_1497063_length_12152_cov_39.0000	lysogenic	low quality draft	13	1	2.86	3	1.18	4	21.31	12152	NA	13	2	0	Low-quality	28.81	HMM-based (lower-bound)	0
k141_1497740_length_7190_cov_475.8638	lytic	low quality draft	9	1	0.01	0	0	1	0.01	7190	NA	9	0	0	Not-determined	NA	NA	0	no viral genes detected
k141_1497783_length_2881_cov_36.0000	lytic	low quality draft	4	0	0	0	0	1	3.72	2881	NA	4	0	0	Not-determined	NA	NA	0	no viral genes detected
k141_1498522_length_4047_cov_268.0000	lytic	low quality draft	5	0	0	2	2	3	5.51	4047	NA	5	1	0	Low-quality	5.19	HMM-based (lower-bound)	0
k141_1498658_length_4497_cov_38.0000	lytic	low quality draft	7	2	2.69	3	4.91	6	22.33	4497	NA	7	5	0	Low-quality	9.62	AAI-based (medium-confidence)	0
k141_1498670_length_2096_cov_15.0000	lytic	low quality draft	6	0	0	0	0	1	0.35	2096	NA	6	1	0	Low-quality	3.39	HMM-based (lower-bound)	0
k141_1499162_length_4051_cov_267.0000	lytic	low quality draft	6	0	0	0	0	1	0.86	4051	NA	6	2	0	Low-quality	7.85	AAI-based (medium-confidence)	0
k141_1499367_length_1215_cov_12.0000	lytic	low quality draft	4	0	0	1	0.33	1	7.73	1215	NA	4	0	0	Low-quality	1.47	AAI-based (medium-confidence)	0	no viral genes detected
k141_1501720_length_3468_cov_306.0000	lytic	low quality draft	6	0	0	1	1	3	9.69	3468	NA	6	5	0	Low-quality	8.01	AAI-based (high-confidence)	0
k141_1501833_length_3648_cov_64.0000	lytic	low quality draft	5	0	0	1	1.22	3	2.53	3648	NA	5	5	0	Low-quality	8.16	HMM-based (lower-bound)	0
k141_1502024_length_4983_cov_824.0000	lytic	low quality draft	13	0	0	0	0	1	0.51	4983	NA	11	0	0	Not-determined	NA	NA	0	no viral genes detected
k141_1502069_length_2265_cov_879.0000	lytic	low quality draft	6	0	0	0	0	1	0.11	2265	NA	6	0	0	Not-determined	NA	NA	0	no viral genes detected
k141_1503066_length_4536_cov_568.0000	lytic	low quality draft	6	1	0.62	1	0.58	4	5.35	4536	NA	5	2	0	Low-quality	1.51	HMM-based (lower-bound)	0
k141_1503113_length_3123_cov_330.2217	lytic	low quality draft	7	1	0.11	0	0	2	4.24	3123	NA	7	1	0	Low-quality	5.89	AAI-based (medium-confidence)	0
k141_1503588_length_2304_cov_1243.0000	lytic	low quality draft	5	1	0.11	0	0	2	11.36	2304	1098	4	1	1	Low-quality	2.32	AAI-based (high-confidence)	52.34
k141_1503620_length_2127_cov_112.0000	lytic	low quality draft	6	1	1.02	0	0	1	10	2127	NA	6	1	0	Low-quality	0.84	HMM-based (lower-bound)	0
k141_1503937_length_1321_cov_512.0000	lytic	low quality draft	4	0	0	0	0	1	3.19	1321	NA	4	1	0	Low-quality	3.28	HMM-based (lower-bound)	0
k141_150477_length_9157_cov_188.0189	lytic	low quality draft	14	0	0	0	0	2	6.71	9157	NA	14	1	0	Low-quality	3.12	HMM-based (lower-bound)	0
k141_1504864_length_1504_cov_95.0000	lytic	low quality draft	5	0	0	1	0.21	1	10	1504	NA	5	0	1	Low-quality	3.51	AAI-based (high-confidence)	0	no viral genes detected
k141_150552_length_2680_cov_27.0000	lytic	low quality draft	6	0	0	0	0	1	10	2680	NA	6	0	0	Not-determined	NA	NA	0	no viral genes detected
k141_1505570_length_7743_cov_523.6617	lytic	low quality draft	11	1	1.75	1	2.21	2	7.21	7743	NA	11	3	0	Low-quality	14.72	AAI-based (medium-confidence)	0
k141_150610_length_5971_cov_2065.5914	lytic	low quality draft	5	0	0	1	0.41	4	15.19	5971	NA	5	4	0	Low-quality	14.25	AAI-based (medium-confidence)	0
k141_1506963_length_7541_cov_43.0000	lytic	low quality draft	6	2	5.65	1	1.61	2	13.71	7541	NA	6	2	0	Low-quality	5.38	AAI-based (medium-confidence)	0
k141_1508148_length_3754_cov_384.0000	lytic	low quality draft	11	0	0	2	2	4	2.78	3754	NA	11	1	0	Low-quality	3.37	HMM-based (lower-bound)	0
k141_1508457_length_3149_cov_827.0000	lytic	low quality draft	5	2	3.07	3	4.74	3	17.08	3149	NA	5	2	0	Low-quality	7.1	AAI-based (medium-confidence)	0
k141_1508704_length_10358_cov_214.0000	lytic	low quality draft	15	0	0	1	0.02	3	2.78	10358	NA	15	3	0	Low-quality	14.38	HMM-based (lower-bound)	0
k141_1508777_length_3193_cov_424.0000	lytic	low quality draft	6	1	2.25	1	2.71	3	16.77	3193	NA	6	3	0	Low-quality	3.65	HMM-based (lower-bound)	0
k141_1509148_length_347694_cov_211.0057_fragment_1	lysogenic	low quality draft	95	22	13.68	20	16.41	18	100.26	99499	NA	95	3	11	Medium-quality	50.39	HMM-based (lower-bound)	0
k141_1509148_length_347694_cov_211.0057_fragment_4	lysogenic	low quality draft	135	22	16.47	28	11.76	21	83.67	144445	NA	135	4	9	Medium-quality	52.25	HMM-based (lower-bound)	0
k141_1509583_length_2756_cov_375.0000	lytic	low quality draft	8	2	1.08	2	0.4	2	6.86	2756	NA	8	1	0	Low-quality	1.72	HMM-based (lower-bound)	0
k141_1509667_length_8657_cov_607.9659	lytic	low quality draft	15	0	0	0	0	2	10.65	8657	NA	15	1	0	Low-quality	4.2	HMM-based (lower-bound)	0
k141_1511734_length_4403_cov_809.8409	lytic	low quality draft	10	0	0	0	0	2	0.37	4403	NA	10	1	0	Low-quality	1.46	HMM-based (lower-bound)	0
k141_1512109_length_3858_cov_442.3089	lytic	low quality draft	6	1	0.01	1	0.13	1	0.77	3858	NA	6	0	1	Not-determined	NA	NA	0	no viral genes detected
k141_1512202_length_2712_cov_722.0000	lytic	low quality draft	5	1	0.72	5	5	5	10.8	2712	NA	5	3	0	Low-quality	5.79	AAI-based (high-confidence)	0
k141_1512548_length_2418_cov_472.0000	lytic	low quality draft	5	1	0.14	1	1.28	2	14.29	2418	NA	5	1	0	Low-quality	5.73	HMM-based (lower-bound)	0
k141_1512877_length_8586_cov_267.0000	lytic	low quality draft	12	5	10.38	5	6.7	8	42.33	8586	NA	12	6	0	Low-quality	16.88	AAI-based (high-confidence)	0
k141_1513000_length_5434_cov_234.8496	lytic	low quality draft	4	0	0	1	0.05	3	0.69	5434	NA	4	2	0	Low-quality	1.25	HMM-based (lower-bound)	0
k141_1513033_length_1828_cov_1390.0000	lytic	low quality draft	4	0	0	0	0	1	4.15	1828	NA	4	0	0	Not-determined	NA	NA	0	no viral genes detected
k141_1513087_length_12945_cov_44.0000	lytic	low quality draft	12	0	0	0	0	2	9.47	12945	NA	12	3	0	Low-quality	10.22	HMM-based (lower-bound)	0
k141_1513155_length_3349_cov_267.0000	lytic	low quality draft	5	0	0	3	4.81	4	28.32	3349	NA	5	3	0	Low-quality	2.45	HMM-based (lower-bound)	0
k141_1513881_length_1715_cov_47.0000	lytic	low quality draft	4	0	0	0	0	1	6.74	1715	NA	4	3	0	Low-quality	2.63	HMM-based (lower-bound)	0
k141_1514000_length_4099_cov_276.0000	lytic	low quality draft	9	0	0	0	0	1	4.77	4099	NA	10	3	0	Low-quality	4.98	AAI-based (medium-confidence)	0
k141_1514552_length_4031_cov_1071.5774	lytic	low quality draft	4	0	0	1	0.47	1	2.7	4031	NA	4	0	0	Not-determined	NA	NA	0	no viral genes detected
k141_1514695_length_1750_cov_1071.0000	lytic	low quality draft	5	0	0	0	0	3	18.76	1750	NA	5	4	0	Low-quality	3.46	AAI-based (high-confidence)	0
k141_1515356_length_2544_cov_51.0000	lytic	low quality draft	6	1	0.26	0	0	2	10.11	2544	NA	6	1	0	Low-quality	0.88	HMM-based (lower-bound)	0
k141_1515571_length_2272_cov_241.0000	lytic	low quality draft	4	0	0	3	4.31	2	10.63	2272	NA	4	3	0	Low-quality	6.51	AAI-based (high-confidence)	0
k141_1515703_length_6386_cov_175.0000	lytic	low quality draft	6	1	1.24	2	3.92	5	3.3	6386	NA	6	5	0	Low-quality	1.35	AAI-based (medium-confidence)	0
k141_1515859_length_2332_cov_568.0000	lytic	low quality draft	5	2	15.32	3	23.7	4	40	2332	NA	5	3	0	Low-quality	1.47	HMM-based (lower-bound)	0
k141_1516008_length_6417_cov_46.0000	lytic	low quality draft	4	0	0	1	0.02	1	8.23	6417	NA	4	0	1	Not-determined	NA	NA	0	no viral genes detected
k141_1516037_length_2047_cov_1075.9885	lytic	low quality draft	6	0	0	1	1.83	1	0.52	2047	1374	6	1	1	Low-quality	2.64	AAI-based (medium-confidence)	32.88
k141_1516318_length_2435_cov_71.0000	lytic	low quality draft	6	1	2.41	1	5.99	2	12.33	2435	NA	6	1	0	Low-quality	3.5	HMM-based (lower-bound)	0
k141_151742_length_2695_cov_1979.5215	lytic	low quality draft	5	0	0	0	0	1	3.45	2695	NA	5	2	0	Low-quality	3.27	HMM-based (lower-bound)	0
k141_1517709_length_4012_cov_73.0000	lytic	low quality draft	9	1	0.16	5	3.54	7	12.84	4012	NA	9	4	0	Low-quality	9.09	AAI-based (high-confidence)	0
k141_1518058_length_3370_cov_511.0000	lytic	low quality draft	7	0	0	1	0.35	2	5.29	3370	NA	7	1	0	Low-quality	6.34	HMM-based (lower-bound)	0
k141_151911_length_2788_cov_478.0000	lytic	low quality draft	5	0	0	3	4.53	4	21.49	2788	NA	5	5	0	Low-quality	7.42	AAI-based (high-confidence)	0
k141_1519406_length_3082_cov_1020.1119	lytic	low quality draft	7	1	0.11	2	0.19	2	1.22	3082	NA	7	0	0	Not-determined	NA	NA	0	no viral genes detected
k141_1519691_length_1961_cov_30.0000	lytic	low quality draft	5	1	0.03	0	0	3	4.48	1961	NA	5	1	0	Low-quality	2.76	AAI-based (high-confidence)	0
k141_1519891_length_2386_cov_475.0000	lytic	low quality draft	7	0	0	1	1	4	6.19	2386	NA	7	3	0	Low-quality	3.61	AAI-based (medium-confidence)	0
k141_1520243_length_12536_cov_103.7771	lytic	medium quality draft	27	6	12.29	9	12.39	12	50.47	12536	NA	28	15	0	Low-quality	28.57	AAI-based (high-confidence)	0
k141_1520703_length_2698_cov_18.0000	lytic	low quality draft	5	0	0	1	2.71	1	10	2698	NA	5	1	0	Low-quality	6.71	AAI-based (high-confidence)	0
k141_1520853_length_3057_cov_181.0000	lytic	low quality draft	12	0	0	0	0	1	10	3057	NA	12	2	0	Low-quality	7.32	AAI-based (medium-confidence)	0
k141_1521822_length_2095_cov_336.0000	lytic	low quality draft	4	1	2.24	1	1	3	12.47	2095	NA	4	2	0	Low-quality	5.76	AAI-based (high-confidence)	0
k141_1523224_length_3806_cov_61.3381	lytic	low quality draft	5	0	0	0	0	1	0.85	3806	NA	5	1	0	Low-quality	2.26	HMM-based (lower-bound)	0
k141_1524088_length_2081_cov_361.0000	lytic	low quality draft	5	0	0	0	0	2	0.85	2081	NA	5	1	0	Low-quality	0.78	HMM-based (lower-bound)	0
k141_1524443_length_2336_cov_228.0000	lytic	low quality draft	5	0	0	0	0	1	0.79	2336	NA	5	1	0	Low-quality	3.5	HMM-based (lower-bound)	0
k141_1524486_length_12648_cov_677.8817	lytic	low quality draft	23	3	4.71	2	4.71	5	12.55	12648	NA	23	2	0	Low-quality	3.09	HMM-based (lower-bound)	0
k141_1524666_length_1092_cov_113.0000	lytic	low quality draft	4	0	0	2	0.83	3	16.65	1092	NA	4	3	0	Low-quality	0.56	AAI-based (medium-confidence)	0
k141_1524700_length_4554_cov_44.0000	lytic	low quality draft	8	1	0.84	2	0.78	1	1.67	4554	NA	8	0	0	Not-determined	NA	NA	0	no viral genes detected
k141_1525164_length_1456_cov_427.0000	lytic	low quality draft	4	0	0	2	1.88	3	11.17	1456	NA	4	2	0	Low-quality	3.26	AAI-based (high-confidence)	0
k141_1525469_length_10335_cov_255.0000	lysogenic	low quality draft	13	1	7	2	6.12	3	21	10335	NA	13	2	0	Low-quality	15.87	HMM-based (lower-bound)	0
k141_1526556_length_7957_cov_602.4204	lytic	low quality draft	12	0	0	2	5.08	5	37.13	7957	NA	11	6	0	Low-quality	19.84	AAI-based (medium-confidence)	0
k141_1526701_length_2533_cov_1231.5305	lytic	low quality draft	4	0	0	1	5.99	1	10	2533	NA	4	0	0	Low-quality	5.64	AAI-based (medium-confidence)	0	no viral genes detected
k141_1526914_length_2293_cov_14.0000	lytic	low quality draft	6	0	0	1	0.11	1	10	2293	NA	6	0	0	Not-determined	NA	NA	0	no viral genes detected
k141_1527106_length_2176_cov_1006.0000	lytic	low quality draft	7	0	0	0	0	1	0.41	2176	NA	7	1	0	Low-quality	0.75	HMM-based (lower-bound)	0
k141_1527156_length_4486_cov_691.0000	lytic	low quality draft	9	0	0	1	0.42	3	6.4	4486	NA	9	4	0	Low-quality	6.22	HMM-based (lower-bound)	0
k141_152740_length_2124_cov_344.0000	lytic	low quality draft	5	0	0	0	0	1	0.31	2124	NA	5	1	0	Low-quality	0.47	HMM-based (lower-bound)	0
k141_1528538_length_1695_cov_2177.0991	lytic	low quality draft	5	0	0	1	1.34	1	3.72	1695	NA	5	0	0	Not-determined	NA	NA	0	no viral genes detected
k141_1528668_length_1307_cov_630.0000	lytic	low quality draft	4	0	0	0	0	1	1.76	1307	NA	3	1	0	Low-quality	0.57	HMM-based (lower-bound)	0
k141_1529255_length_2986_cov_1482.1789	lytic	low quality draft	9	1	4.48	2	7.81	2	15.39	2986	NA	8	4	0	Low-quality	2.56	HMM-based (lower-bound)	0
k141_1530071_length_1540_cov_15.0000	lytic	low quality draft	5	0	0	3	2.5	2	2.67	1540	NA	5	4	0	Low-quality	3	HMM-based (lower-bound)	0
k141_1530374_length_5069_cov_427.0000	lytic	low quality draft	11	3	5.46	3	5.84	4	18.68	5069	NA	11	2	0	Low-quality	7.58	HMM-based (lower-bound)	0
k141_153071_length_3556_cov_225.0000	lytic	low quality draft	4	0	0	0	0	3	0.75	3556	NA	4	1	0	Low-quality	11.23	AAI-based (high-confidence)	0
k141_1531260_length_5348_cov_42.3424	lytic	low quality draft	6	1	0.93	1	0.91	3	5.23	5348	NA	6	2	0	Low-quality	1.73	HMM-based (lower-bound)	0
k141_1532130_length_1427_cov_52.0000	lytic	low quality draft	4	0	0	0	0	2	0.43	1427	NA	4	1	0	Low-quality	2.3	AAI-based (high-confidence)	0
k141_1532614_length_2110_cov_673.0000	lytic	low quality draft	4	0	0	0	0	2	13.82	2110	NA	4	1	0	Low-quality	3.34	AAI-based (medium-confidence)	0
k141_1532843_length_6874_cov_88.9874	lytic	low quality draft	14	0	0	0	0	1	1.09	6874	NA	14	1	0	Low-quality	2.37	HMM-based (lower-bound)	0
k141_1533406_length_4693_cov_169.0000	lytic	low quality draft	5	0	0	1	1.99	3	10.29	4693	NA	5	4	0	Low-quality	10.69	AAI-based (medium-confidence)	0
k141_1533509_length_1172_cov_299.0000	lytic	low quality draft	4	0	0	0	0	1	0.39	1172	NA	4	1	0	Low-quality	0.89	HMM-based (lower-bound)	0
k141_1533677_length_16369_cov_367.3211	lytic	low quality draft	14	5	9.44	5	6.5	10	45.63	16369	NA	14	10	0	Low-quality	4.04	AAI-based (medium-confidence)	0
k141_1534111_length_4081_cov_164.0000	lytic	low quality draft	11	1	4.71	0	0	1	10	4081	NA	11	1	0	Low-quality	1.86	HMM-based (lower-bound)	0
k141_153420_length_6199_cov_107.0000	lytic	low quality draft	9	0	0	2	1.77	3	10.9	6199	NA	9	2	0	Low-quality	49.74	HMM-based (lower-bound)	0
k141_1534544_length_4720_cov_257.0000	lytic	low quality draft	6	1	2.79	0	0	1	10	4720	NA	6	0	0	Not-determined	NA	NA	0	no viral genes detected
k141_1536079_length_11283_cov_236.0000	lysogenic	low quality draft	18	3	12.54	3	5.9	9	35.04	11283	NA	18	5	0	Low-quality	24.54	AAI-based (medium-confidence)	0
k141_1537066_length_1435_cov_40.0000	lytic	low quality draft	4	0	0	0	0	3	12.44	1435	NA	4	3	0	Low-quality	3.69	AAI-based (medium-confidence)	0
k141_1537134_length_3062_cov_34.0000	lytic	low quality draft	4	0	0	1	0.03	2	12.65	3062	NA	4	0	0	Not-determined	NA	NA	0	no viral genes detected
k141_15375_length_3710_cov_270.0261	lytic	low quality draft	4	0	0	1	1.53	2	10.31	3710	NA	4	1	0	Low-quality	1.2	AAI-based (medium-confidence)	0
k141_1537595_length_16024_cov_182.9969	lytic	medium quality draft	29	0	0	4	3.38	10	5.83	16024	NA	29	2	0	Low-quality	25.42	HMM-based (lower-bound)	0
k141_1537675_length_1696_cov_520.0000	lytic	low quality draft	5	0	0	1	1	2	2.03	1696	NA	5	2	0	Low-quality	2.83	AAI-based (high-confidence)	0
k141_153865_length_3615_cov_366.0000	lytic	low quality draft	4	2	1.34	2	5.37	3	6.63	3615	NA	4	3	0	Low-quality	10.28	AAI-based (high-confidence)	0
k141_1538948_length_3103_cov_531.0000	lytic	low quality draft	7	1	0.01	2	0.18	1	1.56	3103	2281	7	1	1	Low-quality	0.82	HMM-based (lower-bound)	26.49
k141_1540081_length_2291_cov_347.0000	lytic	low quality draft	4	0	0	1	4.78	2	15.39	2291	NA	4	2	0	Low-quality	1.35	HMM-based (lower-bound)	0
k141_1540987_length_2377_cov_1794.0197	lytic	low quality draft	4	0	0	1	0.93	2	6.86	2377	NA	4	1	0	Low-quality	6.97	AAI-based (high-confidence)	0
k141_1541563_length_2417_cov_336.0000	lytic	low quality draft	5	0	0	0	0	2	10.26	2417	NA	4	1	0	Low-quality	1.34	HMM-based (lower-bound)	0
k141_1541704_length_4304_cov_398.0000	lytic	low quality draft	8	2	7.91	3	16.92	3	28.05	4304	NA	8	2	0	Low-quality	7.19	AAI-based (medium-confidence)	0
k141_1542143_length_3723_cov_251.1240	lytic	low quality draft	6	2	7.13	2	2.79	4	21.17	3723	NA	6	3	0	Low-quality	7.88	AAI-based (high-confidence)	0
k141_1542680_length_2356_cov_2192.0000	lytic	low quality draft	5	0	0	0	0	1	0.79	2356	NA	5	1	0	Low-quality	3.53	HMM-based (lower-bound)	0
k141_1542874_length_1570_cov_344.0000	lytic	low quality draft	4	0	0	2	7.81	2	8.45	1570	NA	4	1	0	Low-quality	2.77	AAI-based (medium-confidence)	0
k141_1542983_length_2590_cov_1512.5353	lytic	low quality draft	7	1	4.3	1	4.14	4	15.64	2590	NA	6	2	0	Low-quality	2.64	AAI-based (medium-confidence)	0
k141_1543266_length_1373_cov_8.0000	lytic	low quality draft	4	0	0	2	2.4	4	33.39	1373	NA	4	4	0	Low-quality	3.51	AAI-based (high-confidence)	0
k141_1543369_length_4173_cov_428.7991	lytic	low quality draft	5	1	5.15	2	5.39	4	15.73	4173	NA	5	2	0	Low-quality	6.21	HMM-based (lower-bound)	0
k141_1543881_length_2184_cov_20.0000	lytic	low quality draft	4	0	0	1	1	1	3.45	2184	NA	4	3	0	Low-quality	3.05	HMM-based (lower-bound)	0
k141_1544158_length_1483_cov_21.0000	lytic	low quality draft	4	0	0	2	1.86	3	12.58	1483	NA	4	3	0	Low-quality	1.14	HMM-based (lower-bound)	0
k141_1544514_length_1122_cov_3319.0000	lytic	low quality draft	4	0	0	0	0	1	0.07	1122	NA	4	0	0	Not-determined	NA	NA	0	no viral genes detected
k141_1545199_length_5947_cov_612.0000	lytic	low quality draft	9	0	0	1	1.92	3	14.42	5947	NA	9	2	0	Low-quality	1.63	AAI-based (medium-confidence)	0
k141_1545203_length_2700_cov_140.0000	lytic	low quality draft	4	1	0.08	0	0	2	10.31	2700	NA	4	1	0	Low-quality	1.31	HMM-based (lower-bound)	0
k141_1545217_length_1325_cov_18.0000	lytic	low quality draft	4	0	0	0	0	1	0.38	1325	NA	4	0	0	Low-quality	0.44	AAI-based (medium-confidence)	0	no viral genes detected
k141_1545879_length_1697_cov_794.2988	lytic	low quality draft	5	0	0	0	0	1	6.74	1697	NA	5	1	0	Low-quality	3.92	AAI-based (high-confidence)	0
k141_1546021_length_2386_cov_1017.0000	lytic	low quality draft	6	1	0.05	0	0	1	0.11	2386	NA	6	0	0	Not-determined	NA	NA	0	no viral genes detected
k141_1546550_length_2749_cov_1415.5805	lytic	low quality draft	4	0	0	0	0	1	0.18	2749	NA	4	0	0	Not-determined	NA	NA	0	no viral genes detected
k141_1547550_length_3801_cov_39.0000	lysogenic	low quality draft	7	2	2.88	3	10.46	5	20.52	3801	2810	7	1	1	Low-quality	7.51	AAI-based (high-confidence)	26.07
k141_1547666_length_1285_cov_461.0000	lytic	low quality draft	4	1	0.11	1	0.03	2	0.41	1285	NA	4	0	1	Not-determined	NA	NA	0	no viral genes detected
k141_1548743_length_2881_cov_28.0000	lytic	low quality draft	4	1	2.79	2	9.19	3	20.99	2881	NA	4	3	0	Low-quality	6.37	AAI-based (high-confidence)	0
k141_1548882_length_2688_cov_3305.8563	lytic	low quality draft	6	0	0	2	2.22	5	22.28	2688	NA	6	5	0	Low-quality	4.17	HMM-based (lower-bound)	0
k141_1549545_length_57001_cov_134.0000_fragment_1	lysogenic	medium quality draft	37	9	17.58	29	50.86	30	135.36	27939	NA	37	25	0	Medium-quality	83.02	AAI-based (medium-confidence)	0
k141_1549661_length_1244_cov_11.0000	lytic	low quality draft	4	0	0	0	0	2	0.51	1244	NA	4	1	0	Low-quality	2.41	AAI-based (medium-confidence)	0
k141_1550652_length_1675_cov_168.2451	lytic	low quality draft	4	0	0	1	0.56	3	4.78	1675	NA	4	2	0	Low-quality	2.17	AAI-based (high-confidence)	0
k141_1550752_length_2461_cov_108.0000	lytic	low quality draft	6	0	0	1	0.2	3	11.65	2461	NA	6	3	0	Low-quality	6.61	AAI-based (medium-confidence)	0
k141_1551568_length_5290_cov_392.0000	lytic	low quality draft	13	1	1.24	2	3.24	2	3.91	5290	NA	13	0	0	Not-determined	NA	NA	0	no viral genes detected
k141_1551590_length_3103_cov_60.0000	lytic	low quality draft	4	0	0	1	0.27	1	3.25	3103	NA	4	2	0	Low-quality	4.9	AAI-based (high-confidence)	0
k141_1551947_length_3481_cov_2109.7260	lytic	low quality draft	7	0	0	0	0	1	10	3481	NA	7	1	0	Low-quality	1.93	HMM-based (lower-bound)	0
k141_1551969_length_2571_cov_1034.0000	lytic	low quality draft	8	1	0.65	2	1.02	3	6.39	2571	NA	7	2	0	Low-quality	1.22	AAI-based (medium-confidence)	0
k141_1552135_length_1289_cov_341.0000	lytic	low quality draft	4	0	0	0	0	2	0.65	1289	NA	4	1	0	Low-quality	1.24	AAI-based (medium-confidence)	0
k141_1552880_length_1694_cov_512.4121	lytic	low quality draft	4	1	1.04	2	2.86	2	6.31	1694	NA	4	1	0	Low-quality	3.78	AAI-based (medium-confidence)	0
k141_1553096_length_9220_cov_548.0000	lytic	low quality draft	13	3	5.19	3	4.72	3	13.94	9220	NA	13	1	0	Not-determined	NA	NA	0
k141_1553780_length_1574_cov_783.0000	lytic	low quality draft	4	0	0	0	0	1	4.04	1574	NA	4	0	0	Not-determined	NA	NA	0	no viral genes detected
k141_1555926_length_13083_cov_136.5035	lytic	low quality draft	11	2	2.91	1	2.58	5	14.35	13083	NA	11	4	0	Low-quality	4.79	AAI-based (medium-confidence)	0
k141_1556072_length_1304_cov_815.0000	lytic	low quality draft	4	1	4.3	1	4.14	2	10.15	1304	NA	4	2	0	Low-quality	1.28	AAI-based (medium-confidence)	0
k141_1556872_length_4150_cov_448.0000	lytic	low quality draft	4	0	0	0	0	1	0.34	4150	NA	4	2	0	Low-quality	0.97	HMM-based (lower-bound)	0
k141_1557197_length_2286_cov_20.0000	lytic	low quality draft	6	0	0	0	0	1	8.56	2286	NA	6	2	0	Low-quality	5.46	AAI-based (high-confidence)	0
k141_1557764_length_2417_cov_995.0000	lytic	low quality draft	5	0	0	1	1.04	2	4.31	2417	NA	5	0	0	Not-determined	NA	NA	0	no viral genes detected
k141_1558143_length_6131_cov_39.0000	lysogenic	low quality draft	10	0	0	0	0	2	10.05	6131	NA	10	0	0	Not-determined	NA	NA	0	no viral genes detected
k141_1558408_length_23124_cov_3473.3832	lytic	medium quality draft	23	3	12.59	6	31.17	16	81.13	23124	NA	23	12	0	Low-quality	29.75	AAI-based (high-confidence)	0
k141_1559103_length_2228_cov_1475.3872	lytic	low quality draft	8	1	2.79	1	2.5	2	10.15	2228	NA	8	1	0	Low-quality	1.47	HMM-based (lower-bound)	0
k141_1559216_length_7040_cov_243.1180	lytic	low quality draft	11	0	0	3	9.23	4	30.49	7040	NA	11	4	0	Low-quality	18.25	AAI-based (medium-confidence)	0
k141_1559403_length_2120_cov_1539.1248	lytic	low quality draft	4	0	0	0	0	1	1	2120	NA	4	1	0	Low-quality	3.99	HMM-based (lower-bound)	0
k141_1559434_length_3930_cov_1160.1312	lytic	low quality draft	8	1	2.48	4	8.97	6	41.17	3930	NA	8	5	0	Low-quality	9.71	AAI-based (medium-confidence)	0
k141_1559492_length_10096_cov_235.0000	lytic	low quality draft	8	2	3.38	2	0.07	3	10.2	10096	NA	8	0	0	Not-determined	NA	NA	0	no viral genes detected
k141_155975_length_2153_cov_50.0000	lytic	low quality draft	6	1	0.93	1	0.91	1	4.04	2153	NA	6	0	0	Not-determined	NA	NA	0	no viral genes detected
k141_1559755_length_1835_cov_26.0000	lytic	low quality draft	4	0	0	0	0	1	9.5	1835	NA	4	1	0	Low-quality	2.72	HMM-based (lower-bound)	0
k141_1559964_length_3041_cov_481.6948	lytic	low quality draft	6	1	2.48	3	8.7	5	38.83	3041	NA	6	4	0	Low-quality	7.6	AAI-based (high-confidence)	0
k141_1560257_length_3769_cov_301.0000	lysogenic	low quality draft	7	1	7	2	1.36	3	22.82	3769	NA	7	2	0	Low-quality	9.52	AAI-based (high-confidence)	0
k141_1560277_length_9423_cov_105.0000	lytic	low quality draft	22	0	0	0	0	2	4.31	9423	NA	22	2	0	Low-quality	3.96	HMM-based (lower-bound)	0
k141_1561222_length_2947_cov_114.0000	lysogenic	low quality draft	6	1	1	3	1.88	4	18.27	2947	NA	6	3	0	Low-quality	6.48	AAI-based (medium-confidence)	0
k141_1562011_length_4668_cov_472.8734	lytic	low quality draft	11	1	0.51	2	0.21	6	3.12	4668	NA	11	5	0	Low-quality	7.07	AAI-based (medium-confidence)	0
k141_1562051_length_2539_cov_12.0000	lysogenic	low quality draft	5	1	2.08	0	0	4	12.68	2539	NA	5	3	0	Low-quality	6.55	AAI-based (medium-confidence)	0
k141_1562123_length_8307_cov_73.0000	lytic	low quality draft	7	0	0	2	1.77	7	14.89	8307	NA	7	7	0	Low-quality	12.68	AAI-based (medium-confidence)	0
k141_1562217_length_14119_cov_624.5698	lytic	low quality draft	19	0	0	0	0	4	1.78	14119	NA	17	1	0	Low-quality	3.28	HMM-based (lower-bound)	0
k141_1562266_length_1906_cov_1691.0000	lytic	low quality draft	5	0	0	0	0	1	0.28	1906	NA	5	0	0	Not-determined	NA	NA	0	no viral genes detected
k141_1562924_length_2841_cov_918.0000	lytic	low quality draft	7	1	0.54	1	0.53	2	1.95	2841	NA	7	0	1	Not-determined	NA	NA	0	no viral genes detected
k141_156325_length_1835_cov_429.0000	lytic	low quality draft	4	0	0	0	0	1	1.19	1835	NA	4	1	0	Low-quality	6.02	AAI-based (medium-confidence)	0
k141_1563310_length_5567_cov_66.0000	lytic	low quality draft	7	1	0.03	3	3.91	2	10.07	5567	NA	7	4	0	Low-quality	6.16	HMM-based (lower-bound)	0
k141_1563711_length_1365_cov_642.0000	lytic	low quality draft	4	0	0	1	0.42	1	1.64	1365	NA	4	0	0	Not-determined	NA	NA	0	no viral genes detected
k141_1565059_length_2106_cov_1638.0000	lytic	low quality draft	5	0	0	1	0.91	1	4.04	2106	NA	5	0	0	Low-quality	4.92	AAI-based (high-confidence)	0	no viral genes detected
k141_1565192_length_3888_cov_1022.0000	lytic	low quality draft	5	0	0	0	0	1	0.38	3888	NA	5	0	0	Low-quality	7.56	AAI-based (medium-confidence)	0	no viral genes detected
k141_15655_length_10046_cov_114.7032	lytic	low quality draft	22	1	0.58	2	0.18	3	15.22	10046	NA	18	1	0	Low-quality	13.35	HMM-based (lower-bound)	0
k141_1565862_length_2403_cov_1910.2034	lytic	low quality draft	4	0	0	0	0	2	0.95	2403	NA	4	0	0	Low-quality	5.61	AAI-based (medium-confidence)	0	no viral genes detected
k141_1565942_length_1799_cov_982.0000	lytic	low quality draft	5	0	0	0	0	1	10	1799	NA	5	1	0	Low-quality	3.54	AAI-based (high-confidence)	0
k141_1566118_length_1740_cov_514.1614	lytic	low quality draft	5	0	0	2	1.11	1	0.2	1740	NA	5	0	0	Low-quality	9.11	AAI-based (medium-confidence)	0	no viral genes detected
k141_1566129_length_4935_cov_373.0000	lytic	low quality draft	6	1	0.85	1	0.73	2	4.48	4935	NA	6	1	0	Low-quality	10.34	HMM-based (lower-bound)	0
k141_156645_length_3324_cov_32.0000	lytic	low quality draft	4	0	0	1	1.09	1	3.82	3324	NA	4	0	0	Not-determined	NA	NA	0	no viral genes detected
k141_1567258_length_4403_cov_448.0000	lytic	low quality draft	12	0	0	1	0.28	3	5.6	4403	NA	11	0	0	Not-determined	NA	NA	0	no viral genes detected
k141_1567632_length_1859_cov_259.0000	lytic	low quality draft	4	0	0	1	1	1	1.23	1859	NA	4	2	0	Low-quality	2.91	HMM-based (lower-bound)	0
k141_1567838_length_1065_cov_26.0000	lytic	low quality draft	4	0	0	1	0.27	2	3.2	1065	NA	4	2	0	Low-quality	2.6	AAI-based (medium-confidence)	0
k141_1568684_length_3472_cov_45.0000	lytic	low quality draft	4	0	0	3	4.31	2	10.63	3472	NA	4	3	0	Low-quality	10.37	AAI-based (high-confidence)	0
k141_1568940_length_2165_cov_224.0000	lytic	low quality draft	4	0	0	1	0.27	2	10.31	2165	NA	4	1	0	Low-quality	0.48	HMM-based (lower-bound)	0
k141_157001_length_7441_cov_285.0000	lytic	low quality draft	9	1	2.77	0	0	1	10	7441	NA	9	1	0	Low-quality	14.03	AAI-based (high-confidence)	0
k141_1570774_length_4675_cov_2019.1848	lytic	low quality draft	6	2	0.99	2	1.16	2	2.84	4675	NA	6	0	2	Not-determined	NA	NA	0	no viral genes detected
k141_1571022_length_3235_cov_109.0000	lytic	low quality draft	7	0	0	0	0	1	0.78	3235	NA	7	1	0	Low-quality	1.06	HMM-based (lower-bound)	0
k141_1571209_length_2415_cov_539.0000	lytic	low quality draft	4	0	0	3	2.13	4	3.76	2415	NA	4	4	0	Low-quality	7.63	AAI-based (high-confidence)	0
k141_1571953_length_3325_cov_443.0000	lytic	low quality draft	5	1	1.2	1	1.17	4	11.68	3325	NA	5	4	0	Low-quality	5.77	HMM-based (lower-bound)	0
k141_1572027_length_1566_cov_1086.0000	lytic	low quality draft	6	0	0	1	4.26	2	1.22	1566	NA	6	1	0	Low-quality	0.89	HMM-based (lower-bound)	0
k141_1572087_length_2386_cov_335.9105	lytic	low quality draft	5	0	0	1	0.35	1	4.29	2386	NA	5	0	0	Not-determined	NA	NA	0	no viral genes detected
k141_1572185_length_2019_cov_1291.0000	lytic	low quality draft	6	0	0	0	0	1	10	2019	NA	6	1	0	Low-quality	2.1	HMM-based (lower-bound)	0
k141_1573139_length_4065_cov_311.8818	lytic	low quality draft	8	0	0	1	1	3	4.49	4065	NA	8	2	0	Low-quality	2.47	HMM-based (lower-bound)	0
k141_1573407_length_1974_cov_58.0000	lytic	low quality draft	5	0	0	0	0	4	1.08	1974	NA	5	1	0	Low-quality	27.92	AAI-based (high-confidence)	0
k141_1574033_length_3471_cov_65.0000	lytic	low quality draft	4	0	0	0	0	1	5.62	3471	NA	4	1	0	Low-quality	2.1	HMM-based (lower-bound)	0
k141_1574411_length_9734_cov_684.9141	lytic	low quality draft	15	3	8.19	4	11.15	3	24.28	9734	NA	15	1	0	Low-quality	5.43	HMM-based (lower-bound)	0
k141_1574612_length_15047_cov_110.0413	lytic	low quality draft	22	5	12.62	5	15.16	6	56.23	15047	NA	22	1	0	Low-quality	27.89	AAI-based (medium-confidence)	0
k141_1576155_length_5514_cov_1205.0000	lytic	low quality draft	7	0	0	0	0	1	0.12	5514	NA	7	0	0	Not-determined	NA	NA	0	no viral genes detected
k141_15762_length_1497_cov_194.0000	lytic	low quality draft	4	0	0	0	0	1	0.32	1497	NA	4	2	0	Low-quality	0.34	HMM-based (lower-bound)	0
k141_1576925_length_48573_cov_316.1306_fragment_1	lysogenic	low quality draft	21	4	12.31	8	19.27	11	60.12	14099	NA	21	7	1	Low-quality	32.96	AAI-based (medium-confidence)	0
k141_1577230_length_1374_cov_389.0000	lytic	low quality draft	4	0	0	1	0.29	1	1.53	1374	NA	4	1	0	Low-quality	3.3	HMM-based (lower-bound)	0
k141_1577439_length_2740_cov_15.0000	lytic	low quality draft	4	1	2.76	0	0	2	2.09	2740	NA	4	2	0	Low-quality	0.93	HMM-based (lower-bound)	0
k141_1578801_length_3797_cov_586.0000	lytic	low quality draft	6	0	0	5	9.52	5	5.94	3797	NA	6	4	0	Low-quality	11.17	AAI-based (high-confidence)	0
k141_1578996_length_2218_cov_251.0000	lytic	low quality draft	4	0	0	0	0	3	6.76	2218	NA	4	3	0	Low-quality	3.97	HMM-based (lower-bound)	0
k141_1579352_length_3050_cov_394.0000	lytic	low quality draft	7	0	0	0	0	2	14.92	3050	NA	7	3	0	Low-quality	4.21	AAI-based (high-confidence)	0
k141_1579576_length_2181_cov_26.0000	lytic	low quality draft	7	1	4.48	0	0	1	10	2181	NA	7	1	0	Low-quality	1.18	HMM-based (lower-bound)	0
k141_1579990_length_3163_cov_1246.1704	lytic	low quality draft	5	0	0	1	2.87	1	10	3163	NA	5	1	0	Low-quality	4.73	HMM-based (lower-bound)	0
k141_1580111_length_3272_cov_315.8901	lysogenic	low quality draft	4	1	2.87	1	7.58	2	18.05	3272	NA	4	1	0	Low-quality	2.09	HMM-based (lower-bound)	0
k141_1581093_length_6133_cov_824.1303	lytic	low quality draft	14	1	0.52	1	0.05	3	17.95	6133	NA	14	1	1	Low-quality	10.82	AAI-based (medium-confidence)	0
k141_1581417_length_2172_cov_36.0000	lytic	low quality draft	4	0	0	3	1.63	2	1.55	2172	NA	4	2	0	Low-quality	4.28	AAI-based (high-confidence)	0
k141_1581477_length_13152_cov_117.4832	lytic	low quality draft	12	1	2.76	0	0	4	4.32	13152	NA	12	6	0	Low-quality	4.46	HMM-based (lower-bound)	0
k141_158153_length_13496_cov_161.0324	lytic	low quality draft	21	3	6.6	2	9.91	10	32.3	13496	NA	21	9	0	Low-quality	3.56	AAI-based (medium-confidence)	0
k141_1581736_length_5548_cov_397.0000	lytic	low quality draft	6	0	0	0	0	2	2.46	5548	NA	6	2	0	Low-quality	3.45	HMM-based (lower-bound)	0
k141_1582232_length_2101_cov_140.0000	lytic	low quality draft	4	1	1.86	4	6.25	4	23.29	2101	NA	4	4	0	Low-quality	5.62	AAI-based (medium-confidence)	0
k141_1582440_length_17976_cov_231.2649	lytic	medium quality draft	20	2	6.07	2	2.1	11	72.58	17976	NA	20	10	0	Low-quality	4.82	AAI-based (medium-confidence)	0
k141_1583488_length_7977_cov_299.0000	lytic	low quality draft	13	0	0	1	0.01	3	8.79	7977	NA	13	3	0	Low-quality	3.66	HMM-based (lower-bound)	0
k141_158380_length_6856_cov_80.0000	lytic	low quality draft	12	1	0.3	1	0.16	1	2.95	6856	NA	13	0	1	Not-determined	NA	NA	0	no viral genes detected
k141_1584025_length_2477_cov_389.4272	lytic	low quality draft	6	0	0	0	0	2	0.59	2477	NA	6	1	0	Low-quality	0.62	HMM-based (lower-bound)	0
k141_1584422_length_2836_cov_118.0000	lytic	low quality draft	4	1	0.07	1	0.07	2	0.4	2836	NA	4	0	1	Not-determined	NA	NA	0	no viral genes detected
k141_158453_length_2051_cov_3481.6492	lytic	low quality draft	6	0	0	1	1.34	1	3.72	2051	NA	6	0	0	Not-determined	NA	NA	0	no viral genes detected
k141_1585072_length_2340_cov_381.3683	lytic	low quality draft	4	0	0	1	0.26	1	0.69	2340	NA	4	0	0	Not-determined	NA	NA	0	no viral genes detected
k141_1585088_length_6329_cov_1250.7130	lytic	low quality draft	8	0	0	0	0	1	0.18	6329	NA	8	0	0	Not-determined	NA	NA	0	no viral genes detected
k141_1585439_length_2199_cov_177.0000	lytic	low quality draft	4	0	0	0	0	1	10	2199	NA	4	1	0	Low-quality	1.18	HMM-based (lower-bound)	0
k141_158569_length_7427_cov_1154.1444	lytic	low quality draft	9	2	3.86	3	5.54	4	29.95	7427	NA	9	1	0	Low-quality	18.17	AAI-based (medium-confidence)	0
k141_1585912_length_3084_cov_1267.0000	lytic	low quality draft	5	0	0	0	0	1	0.06	3084	NA	3	1	0	Low-quality	28.75	HMM-based (lower-bound)	0
k141_1586001_length_1001_cov_213.0000	lytic	low quality draft	4	0	0	0	0	1	2.29	1001	NA	4	1	0	Low-quality	0.98	HMM-based (lower-bound)	0
k141_1586641_length_2753_cov_324.0000	lytic	low quality draft	5	0	0	0	0	1	1.04	2753	NA	5	2	0	Low-quality	6.82	AAI-based (medium-confidence)	0
k141_1586901_length_46033_cov_233.0806	lytic	medium quality draft	36	3	11.49	5	14.56	21	81.92	46033	NA	36	18	0	Medium-quality	61.96	AAI-based (medium-confidence)	0
k141_1589269_length_4744_cov_20.0000	lysogenic	low quality draft	6	2	8.46	2	11.01	3	27.43	4744	NA	6	1	0	Low-quality	3.19	HMM-based (lower-bound)	0
k141_1589952_length_36090_cov_1177.0000	lytic	medium quality draft	53	8	16.96	15	27.57	13	82.19	36090	NA	51	13	0	Medium-quality	77.48	AAI-based (medium-confidence)	0
k141_1590698_length_2180_cov_100.0000	lytic	low quality draft	4	0	0	0	0	1	10	2180	NA	4	2	0	Low-quality	3.78	AAI-based (medium-confidence)	0
k141_1590920_length_4182_cov_626.0000	lytic	low quality draft	4	1	0.03	1	0.03	3	3.19	4182	NA	4	2	0	Low-quality	1.63	HMM-based (lower-bound)	0
k141_1591095_length_2058_cov_1417.3777	lytic	low quality draft	4	0	0	1	1	3	22.46	2058	NA	4	3	0	Low-quality	4.01	AAI-based (medium-confidence)	0
k141_1592537_length_1605_cov_9.0000	lytic	low quality draft	4	0	0	0	0	2	3.11	1605	NA	4	2	0	Low-quality	2.33	HMM-based (lower-bound)	0
k141_1592575_length_2517_cov_34.0000	lytic	low quality draft	5	0	0	1	1.11	2	7.95	2517	NA	5	2	0	Low-quality	6.55	AAI-based (medium-confidence)	0
k141_159347_length_1683_cov_16.0000	lytic	low quality draft	4	0	0	1	1	2	1.37	1683	NA	4	1	0	Low-quality	2.59	HMM-based (lower-bound)	0
k141_1593506_length_3168_cov_2066.8913	lytic	low quality draft	4	1	1.46	2	1.71	2	3.31	3168	NA	4	0	0	Not-determined	NA	NA	0	no viral genes detected
k141_1594178_length_3742_cov_1058.1600	lytic	low quality draft	11	0	0	0	0	1	10	3742	NA	11	1	0	Low-quality	0.85	HMM-based (lower-bound)	0
k141_1594280_length_4461_cov_24.0000	lytic	low quality draft	4	1	0.62	2	1.31	3	13.3	4461	NA	4	0	1	Low-quality	2.11	AAI-based (medium-confidence)	0	no viral genes detected
k141_1594792_length_2124_cov_394.0000	lytic	low quality draft	6	0	0	1	0.19	1	0.71	2124	NA	6	1	0	Low-quality	4.68	HMM-based (lower-bound)	0
k141_1595117_length_7258_cov_96.0000	lysogenic	low quality draft	5	2	7.09	3	10.19	3	13.2	7258	NA	5	0	0	Not-determined	NA	NA	0	no viral genes detected
k141_1595267_length_6663_cov_506.1311	lytic	low quality draft	5	0	0	0	0	2	1.56	6663	3174	5	1	1	Low-quality	0.71	HMM-based (lower-bound)	52.36
k141_1595478_length_3670_cov_18.0000	lytic	low quality draft	5	0	0	2	3.31	2	10.63	3670	NA	5	3	0	Low-quality	9.88	AAI-based (medium-confidence)	0
k141_1595601_length_1880_cov_6.0000	lytic	low quality draft	4	0	0	0	0	1	4.29	1880	NA	4	0	0	Not-determined	NA	NA	0	no viral genes detected
k141_1595932_length_1008_cov_50.0000	lytic	low quality draft	4	0	0	0	0	1	10	1008	NA	4	2	0	Low-quality	1.2	AAI-based (medium-confidence)	0
k141_1595976_length_4370_cov_1914.0615	lytic	low quality draft	5	1	0.03	1	0.03	3	11.07	4370	NA	5	3	0	Low-quality	4.41	AAI-based (medium-confidence)	0
k141_1596917_length_8120_cov_23.0000	lytic	low quality draft	9	1	0.74	2	4.31	7	9.28	8120	NA	9	6	0	Low-quality	19.03	AAI-based (high-confidence)	0
k141_1597338_length_8342_cov_233.0000	lytic	low quality draft	8	1	1.23	2	2.16	6	10.13	8342	NA	9	5	0	Low-quality	11.98	AAI-based (high-confidence)	0
k141_1597515_length_2054_cov_728.0000	lytic	low quality draft	5	0	0	1	1	2	8.87	2054	NA	4	2	0	Low-quality	4.18	HMM-based (lower-bound)	0
k141_1597749_length_2707_cov_1198.0000	lytic	low quality draft	6	0	0	2	2.19	1	9.32	2707	NA	6	3	0	Low-quality	6.11	AAI-based (high-confidence)	0
k141_1597759_length_1058_cov_5.0000	lytic	low quality draft	4	0	0	2	0.21	2	0.95	1058	NA	4	1	0	Low-quality	2.16	AAI-based (high-confidence)	0
k141_159778_length_3936_cov_176.0000	lysogenic	low quality draft	5	2	3.59	2	9.81	3	12.25	3936	NA	5	1	0	Medium-quality	78.83	AAI-based (high-confidence)	0
k141_1598973_length_1812_cov_512.0000	lytic	low quality draft	5	0	0	1	0.39	1	0.74	1812	NA	5	0	0	Not-determined	NA	NA	0	no viral genes detected
k141_1601133_length_1947_cov_274.0000	lytic	low quality draft	5	0	0	3	1.26	3	7.79	1947	NA	5	3	0	Low-quality	5.73	AAI-based (high-confidence)	0
k141_1601883_length_9130_cov_68.0000	lysogenic	low quality draft	10	2	4.5	5	5.93	3	30	9130	NA	10	0	0	Not-determined	NA	NA	0	no viral genes detected
k141_1602040_length_5656_cov_2268.0000	lytic	low quality draft	4	0	0	0	0	4	4.05	5656	NA	4	4	0	Low-quality	2.29	AAI-based (medium-confidence)	0
k141_1602691_length_2098_cov_9.0000	lytic	low quality draft	4	0	0	0	0	1	0.11	2098	NA	4	0	0	Not-determined	NA	NA	0	no viral genes detected
k141_1602907_length_1229_cov_26.0000	lytic	low quality draft	4	0	0	1	0.43	1	0.63	1229	NA	4	1	0	Low-quality	1.57	HMM-based (lower-bound)	0
k141_1602921_length_3225_cov_89.0000	lytic	low quality draft	7	2	9.65	3	9.3	4	19.21	3225	NA	7	4	0	Low-quality	6.23	AAI-based (medium-confidence)	0
k141_1602926_length_2951_cov_524.9566	lytic	low quality draft	4	0	0	1	0.04	2	0.22	2951	NA	4	0	0	Not-determined	NA	NA	0	no viral genes detected
k141_16036_length_1961_cov_839.7978	lytic	low quality draft	6	1	0.06	0	0	1	1.76	1961	NA	6	1	0	Low-quality	0.85	HMM-based (lower-bound)	0
k141_1603740_length_1513_cov_261.0000	lytic	low quality draft	4	0	0	0	0	1	0.31	1513	NA	4	1	0	Low-quality	0.76	HMM-based (lower-bound)	0
k141_1603814_length_3836_cov_260.0000	lytic	low quality draft	5	2	8.29	2	9.17	3	22.09	3836	NA	5	1	0	Low-quality	4.2	AAI-based (high-confidence)	0
k141_1603875_length_1139_cov_769.0000	lytic	low quality draft	4	1	4.3	2	8.4	2	10.57	1139	NA	4	2	0	Low-quality	0.89	AAI-based (medium-confidence)	0
k141_1604164_length_1865_cov_316.0000	lytic	low quality draft	7	1	2.79	1	2.5	1	10	1865	NA	7	0	0	Not-determined	NA	NA	0	no viral genes detected
k141_1604275_length_4421_cov_55.0000	lytic	low quality draft	6	0	0	3	3.17	4	21.21	4421	NA	6	3	0	Low-quality	11.05	AAI-based (high-confidence)	0
k141_1604948_length_2619_cov_176.0000	lytic	low quality draft	4	0	0	2	0.36	1	4.29	2619	NA	4	0	0	Not-determined	NA	NA	0	no viral genes detected
k141_1605301_length_26573_cov_257.9016_fragment_1	lysogenic	low quality draft	10	3	2.92	3	0.09	5	1.55	7632	NA	10	0	2	Not-determined	NA	NA	0	no viral genes detected
k141_1605305_length_1899_cov_667.0000	lytic	low quality draft	4	0	0	1	0.27	2	2.66	1899	NA	4	1	0	Low-quality	2.96	HMM-based (lower-bound)	0
k141_1605634_length_3613_cov_954.6691	lytic	low quality draft	9	1	2.24	1	2.02	1	6.92	3613	NA	9	1	0	Low-quality	6.22	HMM-based (lower-bound)	0
k141_1605967_length_3241_cov_1016.0000	lytic	low quality draft	7	2	3.36	2	4.74	3	19.18	3241	NA	7	3	0	Low-quality	3.97	HMM-based (lower-bound)	0
k141_1606099_length_2176_cov_1614.9715	lytic	low quality draft	4	0	0	1	5.12	1	10	2176	NA	4	1	0	Low-quality	2.5	HMM-based (lower-bound)	0
k141_1606845_length_1386_cov_34.0000	lytic	low quality draft	4	0	0	0	0	3	4.93	1386	NA	4	3	0	Low-quality	2.72	AAI-based (high-confidence)	0
k141_1607128_length_5464_cov_48.0000	lytic	low quality draft	6	2	2.81	1	1.27	2	4.71	5464	NA	5	0	1	Not-determined	NA	NA	0	no viral genes detected
k141_160730_length_1833_cov_1666.0000	lytic	low quality draft	4	0	0	0	0	1	0.56	1833	NA	4	1	0	Low-quality	0.41	HMM-based (lower-bound)	0
k141_1607325_length_2763_cov_596.0000	lytic	low quality draft	6	1	1.86	5	7.25	4	30.88	2763	NA	6	5	0	Low-quality	6.95	AAI-based (high-confidence)	0
k141_160738_length_14267_cov_132.0000	lytic	low quality draft	21	0	0	8	8.45	14	51.25	14267	NA	21	15	0	Low-quality	27.33	AAI-based (medium-confidence)	0
k141_160778_length_4425_cov_331.0000	lytic	low quality draft	9	3	0.53	3	5.86	5	9.53	4425	NA	9	5	0	Low-quality	10.48	AAI-based (high-confidence)	0
k141_160810_length_11810_cov_365.1223_fragment_1	lysogenic	low quality draft	9	2	1.03	3	6.04	4	11.32	5760	NA	9	2	0	Low-quality	8.26	HMM-based (lower-bound)	0
k141_1608276_length_5441_cov_180.6434	lytic	low quality draft	4	0	0	0	0	1	0.76	5441	NA	4	0	0	Not-determined	NA	NA	0	no viral genes detected
k141_1609339_length_1354_cov_62.0000	lytic	low quality draft	4	0	0	0	0	1	0.38	1354	NA	4	1	0	Low-quality	0.36	HMM-based (lower-bound)	0
k141_1609436_length_10499_cov_258.0000	lytic	low quality draft	14	0	0	1	2.88	1	10	10499	NA	14	3	0	Low-quality	19.76	AAI-based (medium-confidence)	0
k141_1609719_length_4067_cov_228.0000	lytic	low quality draft	6	1	0.95	4	10.23	5	40.85	4067	NA	6	5	0	Low-quality	9.62	AAI-based (high-confidence)	0
k141_161000_length_2805_cov_273.4294	lytic	low quality draft	5	0	0	1	1	3	12.12	2805	NA	5	3	0	Low-quality	6.67	AAI-based (medium-confidence)	0
k141_1610144_length_6967_cov_1232.0000	lytic	low quality draft	6	1	4.45	1	5.4	2	10.31	6967	NA	6	1	0	Low-quality	5.96	AAI-based (medium-confidence)	0
k141_1610176_length_4357_cov_70.0000	lytic	low quality draft	5	0	0	1	0.77	5	11.94	4357	NA	5	5	0	Low-quality	6.64	AAI-based (high-confidence)	0
k141_1610202_length_1514_cov_17.0000	lytic	low quality draft	4	0	0	0	0	1	4.22	1514	NA	4	1	0	Low-quality	2.49	HMM-based (lower-bound)	0
k141_1610294_length_3683_cov_41.0000	lytic	low quality draft	4	0	0	0	0	1	0.34	3683	NA	4	1	0	Low-quality	1.17	HMM-based (lower-bound)	0
k141_1610420_length_2068_cov_641.5693	lytic	low quality draft	5	0	0	1	1.1	2	1.86	2068	NA	3	2	0	Low-quality	5.5	AAI-based (medium-confidence)	0
k141_1610641_length_4678_cov_130.0000	lytic	low quality draft	5	2	0.21	2	1.31	3	30	4678	NA	5	1	0	Low-quality	10.19	AAI-based (medium-confidence)	0
k141_1610665_length_1885_cov_8.0000	lytic	low quality draft	4	0	0	0	0	1	0.16	1885	NA	3	1	0	Low-quality	0.48	HMM-based (lower-bound)	0
k141_1611124_length_8759_cov_698.4130	lysogenic	low quality draft	9	4	12.78	6	4.42	6	32.52	8759	NA	9	5	0	Low-quality	14.4	AAI-based (medium-confidence)	0
k141_1611450_length_4040_cov_3735.0000	lytic	low quality draft	5	0	0	0	0	1	0.27	4040	NA	3	0	0	Not-determined	NA	NA	0	no viral genes detected
k141_1611687_length_3207_cov_507.0000	lytic	low quality draft	4	0	0	1	0.72	2	12.76	3207	NA	4	1	0	Low-quality	0.92	HMM-based (lower-bound)	0
k141_1611968_length_2262_cov_340.1075	lytic	low quality draft	6	0	0	0	0	1	0.1	2262	NA	6	1	0	Low-quality	1.44	HMM-based (lower-bound)	0
k141_1612063_length_2116_cov_25.0000	lytic	low quality draft	4	1	2.79	2	3.22	3	30	2116	NA	4	0	0	Not-determined	NA	NA	0	no viral genes detected
k141_1612284_length_13474_cov_478.0000	lytic	low quality draft	15	2	3.51	2	2.51	4	13.32	13474	NA	15	3	1	Low-quality	4.53	HMM-based (lower-bound)	0
k141_161230_length_4984_cov_881.4111	lytic	low quality draft	4	0	0	3	2.21	4	13.5	4984	NA	4	4	0	Low-quality	11.43	AAI-based (high-confidence)	0
k141_1612680_length_7775_cov_1003.0000	lytic	low quality draft	11	0	0	1	2.88	2	12.21	7775	NA	11	3	0	Low-quality	14.53	AAI-based (high-confidence)	0
k141_16132_length_2977_cov_1117.6735	lytic	low quality draft	6	0	0	1	2.71	2	3.38	2977	NA	6	3	0	Low-quality	4.01	HMM-based (lower-bound)	0
k141_1613919_length_1654_cov_40.0000	lytic	low quality draft	5	0	0	1	0.26	2	10.69	1654	NA	5	2	0	Low-quality	3.39	HMM-based (lower-bound)	0
k141_1614067_length_2598_cov_34.0000	lytic	low quality draft	4	1	0.62	1	0.58	2	7.32	2598	NA	4	0	0	Not-determined	NA	NA	0	no viral genes detected
k141_161430_length_3579_cov_94.0000	lytic	low quality draft	5	0	0	0	0	2	14.07	3579	NA	5	1	0	Low-quality	2.02	AAI-based (medium-confidence)	0
k141_161465_length_2451_cov_975.1260	lytic	low quality draft	4	0	0	0	0	3	5.03	2451	NA	4	3	0	Low-quality	5.04	HMM-based (lower-bound)	0
k141_161473_length_3217_cov_1221.0000	lytic	low quality draft	7	1	0.93	1	0.91	1	4.04	3217	NA	7	0	0	Low-quality	7.52	AAI-based (medium-confidence)	0	no viral genes detected
k141_1614820_length_7914_cov_2491.0000	lytic	low quality draft	14	1	1.86	8	11.09	9	57.02	7914	NA	14	9	0	Low-quality	13.33	AAI-based (medium-confidence)	0
k141_161493_length_4015_cov_1059.2679	lytic	low quality draft	12	1	0.05	2	0.66	2	6.92	4015	NA	11	2	0	Low-quality	3.1	HMM-based (lower-bound)	0
k141_1615252_length_3401_cov_272.0000	lytic	low quality draft	5	0	0	1	1.53	1	10	3401	NA	5	1	0	Low-quality	1.35	HMM-based (lower-bound)	0
k141_1618058_length_8217_cov_207.0466	lytic	low quality draft	11	1	0.36	7	6.44	9	31.92	8217	NA	11	7	0	Low-quality	17.31	AAI-based (medium-confidence)	0
k141_1618248_length_1456_cov_617.0000	lytic	low quality draft	4	0	0	1	0.37	1	2.6	1456	NA	4	0	0	Not-determined	NA	NA	0	no viral genes detected
k141_1618393_length_1481_cov_824.0000	lytic	low quality draft	4	1	4.3	1	4.14	2	11.4	1481	NA	4	1	0	Low-quality	1.78	AAI-based (medium-confidence)	0
k141_1618457_length_2511_cov_460.0000	lytic	low quality draft	4	2	1.6	2	1.55	3	15.27	2511	NA	4	0	0	Not-determined	NA	NA	0	no viral genes detected
k141_1618511_length_3630_cov_23.0000	lytic	low quality draft	4	0	0	1	1	1	1.87	3630	NA	4	2	0	Low-quality	6.64	HMM-based (lower-bound)	0
k141_1618622_length_20397_cov_81.7241	lytic	low quality draft	32	0	0	1	0.65	3	23.23	20397	NA	32	3	0	Medium-quality	56.99	AAI-based (medium-confidence)	0
k141_1618972_length_4843_cov_41.5815	lytic	low quality draft	11	1	3.7	4	8.96	7	29.82	4843	NA	11	5	0	Low-quality	10.87	AAI-based (high-confidence)	0
k141_1619868_length_1421_cov_931.0000	lytic	low quality draft	4	0	0	0	0	1	0.07	1421	NA	3	0	0	Low-quality	2.81	AAI-based (high-confidence)	0	no viral genes detected
k141_1620212_length_1819_cov_52.0000	lytic	low quality draft	4	0	0	4	4	3	4.63	1819	NA	4	4	0	Low-quality	5.04	AAI-based (medium-confidence)	0
k141_1620367_length_2479_cov_29.0000	lytic	low quality draft	4	1	0.01	1	0.02	2	2.29	2479	NA	4	0	0	Not-determined	NA	NA	0	no viral genes detected
k141_1621152_length_2372_cov_172.3312	lytic	low quality draft	4	0	0	0	0	2	3.31	2372	NA	4	2	0	Low-quality	1.35	HMM-based (lower-bound)	0
k141_162162_length_5356_cov_72.0000	lytic	low quality draft	4	1	3.5	2	3.77	2	10.09	5356	NA	4	0	0	Not-determined	NA	NA	0	no viral genes detected
k141_1622178_length_1492_cov_25.0000	lytic	low quality draft	4	0	0	2	1.82	3	26.28	1492	NA	4	4	0	Low-quality	2.44	HMM-based (lower-bound)	0
k141_1622583_length_7714_cov_60.0000	lytic	low quality draft	5	0	0	0	0	5	5.14	7714	NA	5	5	0	Low-quality	2.73	AAI-based (medium-confidence)	0
k141_1622655_length_1006_cov_50.0000	lytic	low quality draft	4	0	0	1	1.4	2	11.72	1006	NA	4	2	0	Low-quality	1.44	AAI-based (high-confidence)	0
k141_1622726_length_1917_cov_769.7691	lytic	low quality draft	5	0	0	0	0	1	0.39	1917	NA	5	1	0	Low-quality	3.2	AAI-based (medium-confidence)	0
k141_1623531_length_17248_cov_147.0964	lytic	low quality draft	25	6	6.13	9	10.01	12	55.58	17248	NA	23	7	0	Low-quality	3.57	AAI-based (medium-confidence)	0
k141_1623780_length_1549_cov_695.9489	lytic	low quality draft	4	0	0	1	0.51	1	1.33	1549	NA	4	1	0	Low-quality	2.08	AAI-based (medium-confidence)	0
k141_1624689_length_3966_cov_832.5106	lytic	low quality draft	7	0	0	1	0.43	1	0.63	3966	NA	7	2	0	Low-quality	10.43	AAI-based (high-confidence)	0
k141_1624771_length_3248_cov_404.7107	lytic	low quality draft	5	0	0	0	0	1	1	3248	NA	5	2	0	Low-quality	5.26	HMM-based (lower-bound)	0
k141_162505_length_2201_cov_1273.0000	lytic	low quality draft	4	0	0	2	2.19	2	10.32	2201	NA	4	2	0	Low-quality	4.01	AAI-based (medium-confidence)	0
k141_1625674_length_3613_cov_139.0225	lytic	low quality draft	7	1	0.01	1	5.99	2	10.06	3613	NA	7	0	0	Low-quality	10.29	AAI-based (medium-confidence)	0	no viral genes detected
k141_1626205_length_10628_cov_354.4827	lytic	low quality draft	16	4	0.62	3	0.09	3	7.07	10628	NA	15	2	2	Low-quality	4.82	HMM-based (lower-bound)	0
k141_1626524_length_1211_cov_15.4523	lytic	low quality draft	4	0	0	3	7.52	3	27.11	1211	NA	4	4	0	Low-quality	1.83	HMM-based (lower-bound)	0
k141_1626948_length_5819_cov_178.0000	lytic	low quality draft	6	1	2.76	0	0	5	13.34	5819	NA	6	5	0	Low-quality	1.51	AAI-based (medium-confidence)	0
k141_1626953_length_1073_cov_90.9195	lytic	low quality draft	4	0	0	1	1.65	1	6.05	1073	NA	4	1	0	Low-quality	2.06	AAI-based (medium-confidence)	0
k141_1627061_length_147110_cov_156.3599_fragment_1	lysogenic	medium quality draft	48	7	16.47	22	36.52	31	186.95	37995	NA	48	33	0	High-quality	93.53	AAI-based (high-confidence)	0
k141_162762_length_3063_cov_28.0000	lytic	low quality draft	6	0	0	0	0	1	0.07	3063	NA	6	1	0	Low-quality	6.98	HMM-based (lower-bound)	0
k141_1627646_length_3068_cov_274.0000	lytic	low quality draft	6	1	0.41	1	0.39	1	0.06	3068	NA	6	0	0	Not-determined	NA	NA	0	no viral genes detected
k141_162782_length_2404_cov_429.0000	lytic	low quality draft	4	0	0	1	1.83	1	0.52	2404	NA	4	1	0	Low-quality	4.52	AAI-based (high-confidence)	0
k141_162804_length_3646_cov_530.0000	lytic	low quality draft	5	0	0	1	0.39	1	0.06	3646	NA	5	1	0	Low-quality	33.99	HMM-based (lower-bound)	0
k141_1628183_length_4261_cov_117.0000	lytic	low quality draft	11	2	2.3	2	3.46	3	16.25	4261	NA	11	3	0	Low-quality	10.12	AAI-based (high-confidence)	0
k141_162884_length_5223_cov_243.0000	lytic	low quality draft	14	2	3.17	1	2.45	3	20.1	5223	NA	13	2	0	Low-quality	3.02	HMM-based (lower-bound)	0
k141_1628951_length_8500_cov_69.0000	lytic	low quality draft	12	4	17.24	5	16.59	7	60.23	8500	NA	12	3	0	Low-quality	16.52	AAI-based (medium-confidence)	0
k141_1629237_length_1485_cov_15.0000	lytic	low quality draft	5	0	0	2	2	3	0.57	1485	NA	5	0	0	Low-quality	9.93	AAI-based (medium-confidence)	0	no viral genes detected
k141_1629724_length_2376_cov_418.0000	lytic	low quality draft	4	0	0	0	0	1	9.78	2376	NA	5	2	0	Low-quality	0.64	AAI-based (medium-confidence)	0
k141_1629742_length_7500_cov_208.0000	lytic	low quality draft	19	1	0.01	1	0.42	4	4.95	7500	NA	19	2	0	Low-quality	3.89	HMM-based (lower-bound)	0
k141_1631709_length_2481_cov_40.0000	lytic	low quality draft	4	0	0	0	0	1	0.99	2481	NA	4	1	0	Low-quality	1.09	HMM-based (lower-bound)	0
k141_1632256_length_2785_cov_410.5291	lytic	low quality draft	9	1	0.93	1	0.91	1	4.04	2785	NA	9	0	0	Not-determined	NA	NA	0	no viral genes detected
k141_1632636_length_3211_cov_518.0000	lytic	low quality draft	5	0	0	0	0	3	14.25	3211	NA	5	2	0	Low-quality	1.81	HMM-based (lower-bound)	0
k141_1632896_length_1592_cov_10.0000	lytic	low quality draft	4	1	1.4	2	1.69	3	12.34	1592	NA	4	1	0	Low-quality	0.9	HMM-based (lower-bound)	0
k141_1633031_length_1589_cov_954.0000	lytic	low quality draft	4	1	2.88	0	0	2	0.8	1589	NA	4	0	0	Low-quality	3.1	AAI-based (medium-confidence)	0	no viral genes detected
k141_1633151_length_1526_cov_41.0000	lytic	low quality draft	5	0	0	1	2.71	1	10	1526	NA	5	2	0	Low-quality	3.71	AAI-based (medium-confidence)	0
k141_1633293_length_2939_cov_22.0000	lytic	low quality draft	7	2	3.36	4	9.01	5	47.11	2939	NA	7	4	0	Low-quality	4.25	HMM-based (lower-bound)	0
k141_1634514_length_1776_cov_1531.6826	lytic	low quality draft	4	0	0	0	0	1	0.93	1776	1366	4	1	1	Low-quality	1.54	AAI-based (medium-confidence)	23.09
k141_163496_length_9449_cov_1263.3745	lytic	low quality draft	10	2	0.07	2	0.08	2	0.25	9449	NA	10	0	1	Not-determined	NA	NA	0	no viral genes detected
k141_1634972_length_2941_cov_173.1864	lytic	low quality draft	4	0	0	0	0	1	1.23	2941	NA	4	2	0	Low-quality	4.59	HMM-based (lower-bound)	0
k141_1635229_length_4552_cov_1759.5359	lytic	low quality draft	6	1	1.08	3	3	4	11.77	4552	NA	6	4	0	Low-quality	8.83	AAI-based (medium-confidence)	0
k141_1637595_length_3830_cov_291.0000	lytic	low quality draft	5	1	7.66	2	15.64	2	20	3830	NA	5	1	0	Low-quality	2.14	HMM-based (lower-bound)	0
k141_1638682_length_8754_cov_161.0000	lytic	medium quality draft	10	2	6.07	0	0	5	50	8754	NA	10	4	0	Low-quality	2.32	AAI-based (medium-confidence)	0
k141_1638709_length_2674_cov_1416.1512	lytic	low quality draft	5	0	0	0	0	1	1.35	2674	NA	6	1	0	Low-quality	4.27	HMM-based (lower-bound)	0
k141_1638981_length_2008_cov_52.0000	lytic	low quality draft	4	0	0	2	2	3	11.13	2008	NA	4	3	0	Low-quality	4.75	AAI-based (medium-confidence)	0
k141_1639441_length_3541_cov_335.9826	lytic	low quality draft	6	0	0	0	0	2	3.21	3541	NA	6	2	0	Low-quality	5.89	HMM-based (lower-bound)	0
k141_1640027_length_2938_cov_1336.0000	lytic	low quality draft	7	1	4.48	2	3.58	2	13.56	2938	NA	7	2	0	Low-quality	1.1	HMM-based (lower-bound)	0
k141_1640415_length_3809_cov_179.0000	lytic	low quality draft	7	1	2.41	6	15.13	5	50	3809	NA	7	6	0	Low-quality	10.15	AAI-based (high-confidence)	0
k141_1640607_length_2178_cov_13.0000	lytic	low quality draft	4	0	0	0	0	1	0.8	2178	NA	4	2	0	Low-quality	6.11	AAI-based (high-confidence)	0
k141_1640772_length_1262_cov_489.0000	lytic	low quality draft	4	0	0	0	0	1	3.44	1262	NA	4	0	0	Low-quality	2.57	AAI-based (medium-confidence)	0	no viral genes detected
k141_1641127_length_4838_cov_631.5936	lysogenic	low quality draft	7	2	2.75	1	1.71	3	20.06	4838	NA	7	2	0	Low-quality	10.78	AAI-based (high-confidence)	0
k141_1641494_length_5074_cov_513.0000	lytic	low quality draft	9	1	0.04	2	0.09	1	2.47	5074	NA	9	1	0	Low-quality	9.83	AAI-based (medium-confidence)	0
k141_1641965_length_3100_cov_22.0000	lytic	low quality draft	8	0	0	0	0	1	7.01	3100	NA	8	1	0	Low-quality	1.6	HMM-based (lower-bound)	0
k141_1642180_length_2648_cov_1827.3566	lytic	low quality draft	7	0	0	0	0	2	2.1	2648	NA	7	0	0	Not-determined	NA	NA	0	no viral genes detected
k141_1642748_length_1749_cov_724.2525	lytic	low quality draft	5	0	0	4	1.52	4	4.89	1749	NA	5	3	0	Low-quality	2.81	HMM-based (lower-bound)	0
k141_1643238_length_3522_cov_1260.0000	lytic	low quality draft	6	2	2.07	1	0.94	2	4.18	3522	NA	6	1	0	Low-quality	0.94	AAI-based (medium-confidence)	0
k141_1643287_length_5386_cov_510.8885	lytic	low quality draft	5	0	0	0	0	4	2.37	5386	NA	5	2	0	Low-quality	2.24	AAI-based (medium-confidence)	0
k141_1643316_length_5264_cov_43.0000	lytic	low quality draft	9	0	0	0	0	1	0.31	5264	NA	9	0	0	Not-determined	NA	NA	0	no viral genes detected
k141_1643403_length_1295_cov_322.0000	lytic	low quality draft	4	0	0	0	0	4	9.96	1295	NA	4	4	0	Low-quality	4.22	AAI-based (high-confidence)	0
k141_1643598_length_3409_cov_732.0000	lytic	low quality draft	7	0	0	1	1.65	1	6.05	3409	NA	7	1	0	Low-quality	6.37	AAI-based (high-confidence)	0
k141_1643642_length_2339_cov_194.0000	lytic	low quality draft	4	0	0	1	1.83	1	0.52	2339	NA	4	1	0	Low-quality	1.77	HMM-based (lower-bound)	0
k141_1643947_length_6914_cov_463.9197	lytic	low quality draft	13	2	3.83	2	4.74	4	27.98	6914	NA	13	3	0	Low-quality	15.94	AAI-based (high-confidence)	0
k141_1644071_length_1853_cov_668.0000	lytic	low quality draft	4	1	2.88	0	0	2	0.8	1853	NA	4	1	0	Low-quality	3.23	HMM-based (lower-bound)	0
k141_1644128_length_1874_cov_33.0000	lytic	low quality draft	5	0	0	0	0	1	0.7	1874	NA	5	2	0	Low-quality	2.51	HMM-based (lower-bound)	0
k141_1644294_length_3772_cov_583.0000	lytic	low quality draft	6	0	0	0	0	1	6.28	3772	NA	6	1	0	Low-quality	4.25	HMM-based (lower-bound)	0
k141_1644383_length_3701_cov_192.0219	lytic	low quality draft	4	0	0	0	0	1	3.82	3701	NA	4	1	0	Low-quality	4.66	HMM-based (lower-bound)	0
k141_1644416_length_2638_cov_1468.5851	lytic	low quality draft	5	0	0	1	0.36	3	13.76	2638	NA	5	3	0	Low-quality	6.77	AAI-based (high-confidence)	0
k141_1644437_length_7010_cov_632.3888	lytic	low quality draft	11	2	5.62	2	3.45	4	21.21	7010	NA	11	2	0	Low-quality	15.24	AAI-based (medium-confidence)	0
k141_1644527_length_3118_cov_959.2724	lytic	low quality draft	8	3	3.96	3	2.9	3	16.86	3118	NA	8	2	0	Low-quality	1.94	HMM-based (lower-bound)	0
k141_1645002_length_3479_cov_333.3844	lytic	low quality draft	6	1	0.03	0	0	1	10	3479	NA	6	0	1	Not-determined	NA	NA	0	no viral genes detected
k141_1645472_length_17952_cov_188.6825	lytic	low quality draft	17	1	0.01	1	0	1	0	17952	NA	18	0	0	Not-determined	NA	NA	0	no viral genes detected
k141_164609_length_14152_cov_249.0000	lytic	low quality draft	23	1	2.77	9	7.69	14	45.62	14152	NA	23	14	0	Low-quality	38.16	AAI-based (medium-confidence)	0
k141_1646793_length_8260_cov_164.0000	lytic	low quality draft	12	1	0.84	3	1.78	2	2.12	8260	NA	12	0	0	Not-determined	NA	NA	0	no viral genes detected
k141_1647231_length_4652_cov_2054.1472	lytic	low quality draft	4	1	1.08	3	3	3	15.29	4652	NA	4	4	0	Low-quality	10.56	AAI-based (high-confidence)	0
k141_1647272_length_3987_cov_1365.0000	lytic	low quality draft	5	2	0.02	3	0.13	3	0.52	3987	NA	5	0	2	Low-quality	1.32	AAI-based (medium-confidence)	0	no viral genes detected
k141_1647277_length_1169_cov_19.0000	lytic	low quality draft	4	0	0	2	1.47	3	4.72	1169	NA	4	2	0	Low-quality	2.7	HMM-based (lower-bound)	0
k141_1647518_length_46310_cov_227.0006	lytic	medium quality draft	69	3	6.75	22	23.4	34	134.49	46310	NA	69	37	0	Medium-quality	80.63	AAI-based (high-confidence)	0
k141_164756_length_43441_cov_84.4674	lytic	high quality draft	37	5	13.47	6	10.24	22	100.42	43441	NA	37	15	0	Low-quality	9.99	AAI-based (medium-confidence)	0
k141_1647926_length_22975_cov_27.0000	lytic	medium quality draft	27	7	14.77	6	13.26	10	59.74	22975	NA	27	4	0	Low-quality	7.77	HMM-based (lower-bound)	0
k141_1648202_length_1289_cov_1072.0000	lytic	low quality draft	4	0	0	0	0	1	10	1289	NA	4	1	0	Low-quality	2.77	AAI-based (medium-confidence)	0
k141_1648665_length_1999_cov_1134.0000	lytic	low quality draft	5	0	0	0	0	5	36.04	1999	NA	5	5	0	Low-quality	6.79	AAI-based (high-confidence)	0
k141_1649143_length_3664_cov_197.0000	lytic	low quality draft	8	1	0.12	1	0.16	2	0.82	3664	NA	8	2	0	Low-quality	0.81	AAI-based (medium-confidence)	0
k141_1650183_length_2001_cov_563.0000	lytic	low quality draft	5	0	0	0	0	2	10.31	2001	NA	5	1	0	Low-quality	0.47	HMM-based (lower-bound)	0
k141_1650444_length_1012_cov_1025.0000	lytic	low quality draft	4	0	0	0	0	1	8.56	1012	NA	3	1	0	Low-quality	1.33	HMM-based (lower-bound)	0
k141_1650543_length_4466_cov_1442.0000	lytic	low quality draft	7	2	4.1	2	4.73	3	10.84	4466	NA	7	3	0	Low-quality	9.4	AAI-based (medium-confidence)	0
k141_1650546_length_2202_cov_1640.0000	lytic	low quality draft	4	1	0.36	0	0	2	14.29	2202	NA	4	0	0	Not-determined	NA	NA	0	no viral genes detected
k141_1650880_length_5494_cov_620.9339	lytic	low quality draft	7	3	7.44	3	8.91	3	20.61	5494	NA	7	1	0	Low-quality	9.88	AAI-based (medium-confidence)	0
k141_1650997_length_4438_cov_64.0000	lysogenic	low quality draft	10	2	8	3	12.01	2	11.8	4438	NA	10	1	0	Low-quality	2.98	HMM-based (lower-bound)	0
k141_1651051_length_1516_cov_52.0284	lytic	low quality draft	4	0	0	0	0	1	0.59	1516	NA	4	1	0	Low-quality	0.69	HMM-based (lower-bound)	0
k141_1651236_length_1034_cov_446.0000	lytic	low quality draft	4	0	0	0	0	1	2.29	1034	NA	4	1	0	Low-quality	1.02	HMM-based (lower-bound)	0
k141_1651488_length_1681_cov_108.0000	lytic	low quality draft	4	0	0	0	0	3	7.1	1681	NA	4	3	0	Low-quality	2.47	AAI-based (medium-confidence)	0
k141_1651930_length_3759_cov_12.0000	lytic	low quality draft	6	1	0.04	0	0	1	0.15	3759	NA	6	0	0	Not-determined	NA	NA	0	no viral genes detected
k141_1652634_length_2200_cov_13.0000	lytic	low quality draft	4	0	0	0	0	1	0.29	2200	NA	4	1	0	Low-quality	1.99	HMM-based (lower-bound)	0
k141_1653080_length_4454_cov_466.0000	lytic	low quality draft	4	1	0.61	3	6.37	3	6.84	4454	NA	4	3	0	Low-quality	12.58	AAI-based (high-confidence)	0
k141_1653596_length_2414_cov_885.0084	lytic	low quality draft	4	0	0	0	0	2	3.14	2414	NA	4	2	0	Low-quality	6.71	AAI-based (high-confidence)	0
k141_1653664_length_3990_cov_34.0000	lytic	low quality draft	7	0	0	1	1.01	6	28.52	3990	NA	7	6	0	Low-quality	7.48	AAI-based (medium-confidence)	0
k141_1653766_length_2253_cov_766.0000	lytic	low quality draft	5	0	0	0	0	3	1.01	2253	NA	5	3	0	Low-quality	0.51	HMM-based (lower-bound)	0
k141_1654410_length_1873_cov_1506.0000	lytic	low quality draft	5	1	0.69	0	0	2	5.29	1873	NA	5	2	0	Low-quality	4.41	AAI-based (medium-confidence)	0
k141_1654511_length_2153_cov_462.0000	lytic	low quality draft	6	0	0	2	0.48	2	2.24	2153	NA	6	2	0	Low-quality	5	HMM-based (lower-bound)	0
k141_165460_length_3250_cov_469.0000	lytic	low quality draft	5	0	0	3	4.53	3	11.49	3250	NA	5	3	0	Low-quality	8.64	AAI-based (high-confidence)	0
k141_165476_length_1267_cov_482.0000	lytic	low quality draft	4	0	0	1	2.29	1	5.02	1267	NA	4	1	0	Low-quality	2.77	AAI-based (medium-confidence)	0
k141_1655208_length_51819_cov_159.2256_fragment_1	lysogenic	medium quality draft	18	6	10.6	10	10.27	11	41.73	10473	NA	19	7	1	Low-quality	25.08	AAI-based (medium-confidence)	0
k141_1655428_length_9662_cov_54.0000	lytic	low quality draft	13	1	0.74	1	1.58	2	12.5	9662	NA	13	2	0	Low-quality	8.88	HMM-based (lower-bound)	0
k141_1655650_length_10148_cov_503.5351	lytic	low quality draft	10	1	1.23	1	1.24	1	1.12	10148	NA	10	1	0	Low-quality	6.16	HMM-based (lower-bound)	0
k141_1655751_length_3779_cov_22.0000	lytic	low quality draft	7	1	3.29	2	1.25	3	2.15	3779	NA	7	3	0	Low-quality	9.54	AAI-based (medium-confidence)	0
k141_1655920_length_1315_cov_228.0000	lytic	low quality draft	4	0	0	0	0	1	2.7	1315	NA	4	1	0	Low-quality	1.72	HMM-based (lower-bound)	0
k141_1657070_length_1945_cov_170.0000	lytic	low quality draft	6	1	0.62	0	0	1	10	1945	NA	6	1	0	Low-quality	1.01	HMM-based (lower-bound)	0
k141_1657461_length_1467_cov_179.0000	lytic	low quality draft	6	0	0	1	0.65	3	11.07	1467	NA	6	3	0	Low-quality	0.95	HMM-based (lower-bound)	0
k141_1657606_length_2601_cov_57.0000	lytic	low quality draft	5	0	0	1	0.66	1	1.97	2601	NA	5	1	0	Low-quality	1.59	HMM-based (lower-bound)	0
k141_1657693_length_1780_cov_7.0000	lytic	low quality draft	4	0	0	0	0	1	0.3	1780	NA	4	0	0	Not-determined	NA	NA	0	no viral genes detected
k141_1658652_length_6692_cov_693.0424	lytic	low quality draft	8	0	0	2	3.88	5	13.57	6692	NA	8	3	1	Low-quality	8.65	HMM-based (lower-bound)	0
k141_1658797_length_1769_cov_250.0000	lytic	low quality draft	4	0	0	2	3.1	2	10.35	1769	NA	4	2	0	Low-quality	2.87	HMM-based (lower-bound)	0
k141_1658916_length_4015_cov_287.0000	lysogenic	low quality draft	7	1	2.87	1	9.33	3	11.52	4015	NA	7	1	0	Low-quality	7.08	AAI-based (medium-confidence)	0
k141_1659048_length_1505_cov_123.0000	lytic	low quality draft	4	0	0	1	0.35	1	4.29	1505	NA	4	0	0	Not-determined	NA	NA	0	no viral genes detected
k141_1659194_length_1217_cov_3483.0000	lytic	low quality draft	4	0	0	0	0	2	20	1217	NA	4	3	0	Low-quality	4.13	AAI-based (high-confidence)	0
k141_1660282_length_13496_cov_105.0000	lytic	low quality draft	17	0	0	1	5.12	8	45.4	13496	NA	17	11	0	Low-quality	31.71	AAI-based (medium-confidence)	0
k141_1660345_length_2999_cov_19.3121	lytic	low quality draft	7	0	0	0	0	7	33.02	2999	NA	7	7	0	Low-quality	7.49	AAI-based (medium-confidence)	0
k141_1661213_length_2478_cov_989.4442	lytic	low quality draft	4	1	2.76	2	3.13	2	10.07	2478	NA	4	0	0	Not-determined	NA	NA	0	no viral genes detected
k141_1661245_length_12360_cov_101.0000	lytic	low quality draft	11	4	7.29	4	5.61	7	50.27	12360	NA	11	6	1	Low-quality	2.71	AAI-based (medium-confidence)	0
k141_1661294_length_1309_cov_207.0000	lytic	low quality draft	4	0	0	1	0.04	2	0.22	1309	NA	4	0	0	Not-determined	NA	NA	0	no viral genes detected
k141_1661730_length_44074_cov_131.0725	lytic	high quality draft	59	5	12.73	15	22.6	26	137.01	44074	NA	59	27	0	High-quality	100	AAI-based (high-confidence)	0
k141_1662608_length_2851_cov_226.0000	lytic	low quality draft	5	0	0	0	0	2	1.32	2851	NA	5	2	0	Low-quality	5.35	AAI-based (medium-confidence)	0
k141_1662727_length_1743_cov_219.0000	lytic	low quality draft	4	0	0	0	0	1	10	1743	NA	4	0	0	Low-quality	3.27	AAI-based (medium-confidence)	0	no viral genes detected
k141_166308_length_1153_cov_955.0000	lytic	low quality draft	4	0	0	0	0	1	3.08	1153	NA	4	1	0	Low-quality	1.25	AAI-based (medium-confidence)	0
k141_1663295_length_5612_cov_545.0000	lytic	low quality draft	7	0	0	0	0	2	3.36	5612	2965	7	1	1	Low-quality	5.48	AAI-based (medium-confidence)	47.17
k141_1664713_length_1341_cov_1192.0000	lytic	low quality draft	5	0	0	1	2.75	2	12.61	1341	NA	5	2	0	Low-quality	1.86	AAI-based (medium-confidence)	0
k141_166513_length_3943_cov_309.0137	lytic	low quality draft	7	0	0	0	0	1	1.23	3943	NA	7	3	0	Low-quality	5.51	HMM-based (lower-bound)	0
k141_1665251_length_1377_cov_1967.0000	lytic	low quality draft	4	0	0	0	0	1	1.56	1377	NA	4	1	0	Low-quality	1.27	AAI-based (medium-confidence)	0
k141_1665716_length_18207_cov_2213.3978	lytic	low quality draft	18	8	6.47	9	24.25	7	40.68	18207	NA	18	0	0	Not-determined	NA	NA	0	no viral genes detected
k141_1666365_length_4504_cov_120.9658	lytic	low quality draft	10	2	0.6	2	0.84	3	0.95	4504	NA	10	1	0	Low-quality	2.74	HMM-based (lower-bound)	0
k141_1666433_length_2041_cov_1419.0000	lysogenic	low quality draft	4	1	7	1	9.33	2	12.24	2041	NA	4	1	0	Low-quality	4.49	AAI-based (high-confidence)	0
k141_166645_length_8465_cov_794.0000	lytic	low quality draft	12	2	5.2	1	1.9	6	34.67	8465	NA	12	4	0	Low-quality	16.7	AAI-based (medium-confidence)	0
k141_1666798_length_2764_cov_1051.0297	lytic	low quality draft	6	1	0.95	2	3.96	3	14.17	2764	NA	6	1	0	Low-quality	7.23	AAI-based (medium-confidence)	0
k141_1666801_length_2469_cov_60.0000	lytic	low quality draft	6	0	0	0	0	1	0.11	2469	NA	6	0	0	Low-quality	4.17	AAI-based (medium-confidence)	0	no viral genes detected
k141_1667348_length_2234_cov_1521.0000	lytic	low quality draft	6	1	3.81	1	5.1	1	10	2234	NA	6	0	0	Low-quality	5.18	AAI-based (high-confidence)	0	no viral genes detected
k141_1668123_length_3890_cov_165.0000	lytic	low quality draft	6	0	0	0	0	3	2.62	3890	NA	6	1	0	Low-quality	9.15	AAI-based (medium-confidence)	0
k141_1668189_length_4015_cov_120.4641	lytic	low quality draft	7	0	0	0	0	2	3.78	4015	NA	6	1	0	Low-quality	2.11	HMM-based (lower-bound)	0
k141_1669078_length_2201_cov_720.1757	lytic	low quality draft	4	0	0	0	0	2	11.46	2201	NA	4	2	0	Low-quality	1.22	HMM-based (lower-bound)	0
k141_1669124_length_17699_cov_84.0000	lysogenic	low quality draft	23	8	13.85	11	22.78	7	44.1	17699	NA	23	1	0	Low-quality	40.5	HMM-based (lower-bound)	0
k141_1669382_length_2570_cov_719.0000	lytic	low quality draft	7	0	0	0	0	1	0.39	2570	NA	7	1	0	Low-quality	4.8	AAI-based (medium-confidence)	0
k141_1670892_length_1701_cov_958.0000	lytic	low quality draft	4	0	0	1	0.19	2	2.07	1701	NA	4	2	0	Low-quality	3.27	AAI-based (high-confidence)	0
k141_1671766_length_2241_cov_434.0000	lytic	low quality draft	5	1	1	1	0.28	3	6.72	2241	NA	5	3	0	Low-quality	34.35	AAI-based (high-confidence)	0
k141_1671891_length_4211_cov_22.0000	lytic	low quality draft	6	0	0	0	0	1	1.09	4211	NA	6	4	0	Low-quality	6.32	HMM-based (lower-bound)	0
k141_1672183_length_3993_cov_85.0000	lytic	low quality draft	6	0	0	0	0	1	2.89	3993	NA	6	1	1	Low-quality	2.68	HMM-based (lower-bound)	0
k141_1672239_length_4280_cov_389.0000	lytic	low quality draft	5	0	0	0	0	3	3.26	4280	NA	5	2	0	Low-quality	3.23	HMM-based (lower-bound)	0
k141_1672322_length_8574_cov_30.0000	lytic	low quality draft	17	2	3.51	12	13.72	15	49.7	8574	NA	17	15	0	Low-quality	22.93	AAI-based (high-confidence)	0
k141_1672758_length_2235_cov_374.0000	lytic	low quality draft	5	1	2.25	2	0.58	2	3.58	2235	NA	5	2	0	Low-quality	2.24	HMM-based (lower-bound)	0
k141_1672937_length_1994_cov_898.4290	lytic	low quality draft	4	1	2.08	2	6.24	2	16.13	1994	NA	4	0	0	Not-determined	NA	NA	0	no viral genes detected
k141_1673043_length_3606_cov_17.0000	lytic	low quality draft	10	0	0	1	1	2	3.57	3606	NA	10	4	0	Low-quality	4.38	HMM-based (lower-bound)	0
k141_1673063_length_2420_cov_35.0000	lytic	low quality draft	5	1	2.88	1	1.35	5	1.78	2420	NA	5	3	0	Low-quality	5.68	AAI-based (high-confidence)	0
k141_1673674_length_2642_cov_735.0000	lytic	low quality draft	4	0	0	1	5.99	2	20	2642	NA	4	0	0	Not-determined	NA	NA	0	no viral genes detected
k141_1673740_length_2511_cov_776.0000	lytic	low quality draft	5	2	3.05	3	2.97	4	11.62	2511	NA	5	2	0	Low-quality	6.4	AAI-based (medium-confidence)	0
k141_1673957_length_2217_cov_1095.4306	lytic	low quality draft	5	0	0	0	0	1	0.32	2217	NA	5	1	0	Low-quality	1.23	HMM-based (lower-bound)	0
k141_1674398_length_2007_cov_324.0000	lytic	low quality draft	4	0	0	0	0	3	1.7	2007	NA	4	1	0	Low-quality	1	HMM-based (lower-bound)	0
k141_1674449_length_11393_cov_681.6060	lytic	low quality draft	27	1	0.05	1	0.05	3	1.35	11393	NA	26	1	0	Low-quality	10.34	HMM-based (lower-bound)	0
k141_1674834_length_3379_cov_1317.7221	lytic	low quality draft	6	0	0	3	2.47	5	8.92	3379	NA	6	3	0	Low-quality	9.3	AAI-based (medium-confidence)	0
k141_1676073_length_1294_cov_24.0000	lytic	low quality draft	4	0	0	2	2	2	3.1	1294	NA	4	1	0	Low-quality	0.99	AAI-based (high-confidence)	0
k141_1676222_length_1054_cov_18.0000	lytic	low quality draft	4	0	0	0	0	1	10	1054	NA	4	1	0	Low-quality	1.03	AAI-based (medium-confidence)	0
k141_1676759_length_3066_cov_191.0000	lytic	low quality draft	6	0	0	2	3.3	4	26.77	3066	NA	6	5	0	Low-quality	4.65	HMM-based (lower-bound)	0
k141_1677873_length_1563_cov_25.0000	lytic	low quality draft	5	0	0	1	1	2	6.78	1563	NA	5	3	0	Low-quality	3.65	AAI-based (high-confidence)	0
k141_1678539_length_2859_cov_87.7292	lytic	low quality draft	7	0	0	0	0	2	0.71	2859	NA	7	2	0	Low-quality	1.4	HMM-based (lower-bound)	0
k141_1678613_length_7322_cov_65.0000	lysogenic	low quality draft	8	1	2.87	0	0	1	10	7322	NA	8	0	0	Not-determined	NA	NA	0	no viral genes detected
k141_1678894_length_3692_cov_626.0000	lysogenic	low quality draft	6	1	7	1	9.33	1	10	3692	NA	6	0	0	Low-quality	7.45	AAI-based (medium-confidence)	0	no viral genes detected
k141_1678968_length_1993_cov_469.0000	lytic	low quality draft	6	1	3.81	1	5.1	1	10	1993	NA	6	0	0	Low-quality	2.31	AAI-based (medium-confidence)	0	no viral genes detected
k141_167904_length_3852_cov_14.0000	lytic	low quality draft	8	0	0	0	0	1	10	3852	NA	8	1	0	Low-quality	12.33	AAI-based (high-confidence)	0
k141_1679756_length_1872_cov_209.0000	lytic	low quality draft	4	0	0	0	0	3	0.63	1872	NA	4	2	0	Low-quality	4.49	AAI-based (high-confidence)	0
k141_1680043_length_2205_cov_1000.0000	lytic	low quality draft	7	1	0.14	1	3.05	1	2.17	2205	NA	7	1	0	Low-quality	1.01	HMM-based (lower-bound)	0
k141_1680225_length_7553_cov_44.0000	lytic	low quality draft	9	0	0	5	7.18	5	5.61	7553	NA	9	4	0	Low-quality	21.78	AAI-based (medium-confidence)	0
k141_168027_length_3664_cov_1232.3542	lytic	low quality draft	8	1	2.08	2	0.63	3	12.66	3664	NA	8	2	0	Low-quality	5.59	HMM-based (lower-bound)	0
k141_1680636_length_1266_cov_1974.0000	lytic	low quality draft	4	0	0	0	0	1	1.35	1266	NA	5	1	0	Low-quality	2.02	HMM-based (lower-bound)	0
k141_1680901_length_32386_cov_319.0000	lytic	medium quality draft	45	8	13.42	26	35.57	25	78.67	32386	NA	45	30	0	Medium-quality	72.17	AAI-based (high-confidence)	0
k141_1681244_length_2829_cov_675.3367	lytic	low quality draft	4	0	0	0	0	2	10.86	2829	NA	4	1	0	Low-quality	1.78	HMM-based (lower-bound)	0
k141_1681375_length_5692_cov_165.4053	lytic	low quality draft	9	2	5.67	1	4.14	3	23.83	5692	NA	9	3	0	Low-quality	3.32	AAI-based (medium-confidence)	0
k141_1681408_length_2983_cov_496.0000	lytic	low quality draft	5	1	2.79	1	1.61	2	10.65	2983	NA	5	0	0	Low-quality	6.73	AAI-based (medium-confidence)	0	no viral genes detected
k141_1681719_length_2615_cov_677.0000	lytic	low quality draft	5	0	0	0	0	2	11.35	2615	NA	5	2	0	Low-quality	6.13	AAI-based (medium-confidence)	0
k141_1681868_length_2301_cov_1781.0000	lytic	low quality draft	4	0	0	2	4.08	4	17.07	2301	NA	4	3	0	Low-quality	7.81	AAI-based (high-confidence)	0
k141_1682585_length_3008_cov_340.0000	lytic	low quality draft	10	0	0	0	0	1	2.29	3008	NA	10	1	0	Low-quality	2.96	HMM-based (lower-bound)	0
k141_1683344_length_1706_cov_168.0000	lytic	low quality draft	6	1	4.34	1	0.56	2	20	1706	NA	6	1	0	Low-quality	1.44	HMM-based (lower-bound)	0
k141_1683441_length_2233_cov_48.0000	lytic	low quality draft	6	1	0.45	1	0.23	1	1.49	2233	NA	6	0	0	Low-quality	0.86	AAI-based (medium-confidence)	0	no viral genes detected
k141_1684207_length_2815_cov_707.0000	lytic	low quality draft	6	1	0.03	2	0.28	4	10.04	2815	NA	6	2	0	Low-quality	1.64	HMM-based (lower-bound)	0
k141_1684775_length_3383_cov_26.0000	lytic	low quality draft	8	0	0	1	0	4	13.54	3383	NA	8	4	0	Low-quality	7.33	AAI-based (high-confidence)	0
k141_1686925_length_5167_cov_167.0000	lytic	low quality draft	9	1	2.86	0	0	2	9.88	5167	NA	9	2	0	Low-quality	2.24	HMM-based (lower-bound)	0
k141_168780_length_1727_cov_2050.4092	lytic	low quality draft	5	0	0	1	1.34	1	3.72	1727	NA	5	0	0	Not-determined	NA	NA	0	no viral genes detected
k141_169599_length_2004_cov_11.0000	lytic	low quality draft	4	1	0.93	1	0.91	2	5.11	2004	NA	4	1	0	Low-quality	0.69	HMM-based (lower-bound)	0
k141_169616_length_3915_cov_623.0000	lytic	low quality draft	8	2	0.68	2	1.44	2	17.2	3915	3496	8	1	1	Low-quality	1.01	HMM-based (lower-bound)	10.7
k141_169764_length_2462_cov_42.0000	lytic	low quality draft	4	0	0	1	1.25	4	16.58	2462	NA	4	4	0	Low-quality	4.01	HMM-based (lower-bound)	0
k141_170266_length_1416_cov_19.0000	lytic	low quality draft	4	0	0	1	0.35	1	0.42	1416	NA	4	2	0	Low-quality	3.87	AAI-based (medium-confidence)	0
k141_170682_length_3588_cov_372.0145	lytic	low quality draft	5	0	0	2	3.31	2	10.63	3588	NA	5	3	0	Low-quality	5.4	HMM-based (lower-bound)	0
k141_171153_length_4275_cov_399.0000	lytic	low quality draft	4	0	0	2	0.54	1	1.33	4275	NA	4	0	0	Low-quality	8.25	AAI-based (high-confidence)	0	no viral genes detected
k141_171680_length_7518_cov_364.0001	lytic	low quality draft	8	1	2.86	0	0	1	6.23	7518	NA	8	1	0	Low-quality	2.67	HMM-based (lower-bound)	0
k141_171963_length_3268_cov_1347.2856	lytic	low quality draft	5	0	0	0	0	1	0.62	3268	NA	5	2	0	Low-quality	6.01	HMM-based (lower-bound)	0
k141_172352_length_3013_cov_57.0000	lytic	low quality draft	4	0	0	0	0	1	0.86	3013	NA	4	0	0	Not-determined	NA	NA	0	no viral genes detected
k141_172445_length_4235_cov_501.0071	lytic	low quality draft	5	0	0	0	0	1	3.16	4235	NA	5	1	0	Low-quality	2.61	HMM-based (lower-bound)	0
k141_173273_length_4293_cov_50.0000	lytic	low quality draft	6	1	2.08	1	5.99	1	10	4293	NA	6	1	0	Low-quality	6.88	HMM-based (lower-bound)	0
k141_173573_length_2255_cov_887.0128	lytic	low quality draft	5	0	0	2	3.1	2	10.35	2255	NA	5	2	0	Low-quality	4.75	AAI-based (medium-confidence)	0
k141_17370_length_3914_cov_20.0000	lytic	low quality draft	6	2	4.34	3	7.74	3	11.62	3914	NA	6	1	0	Low-quality	4.52	HMM-based (lower-bound)	0
k141_174204_length_3826_cov_591.0000	lytic	low quality draft	7	1	0.58	1	0.18	1	3.31	3826	NA	6	0	0	Not-determined	NA	NA	0	no viral genes detected
k141_174321_length_2395_cov_930.0688	lytic	low quality draft	4	0	0	0	0	4	27.15	2395	NA	4	4	0	Low-quality	3.95	HMM-based (lower-bound)	0
k141_174614_length_3501_cov_1543.5256	lytic	low quality draft	7	0	0	0	0	1	5.02	3501	NA	7	1	0	Low-quality	6.57	AAI-based (high-confidence)	0
k141_174650_length_1582_cov_30.0000	lytic	low quality draft	5	0	0	0	0	1	0.3	1582	NA	5	0	0	Not-determined	NA	NA	0	no viral genes detected
k141_174789_length_1509_cov_1243.6477	lytic	low quality draft	5	0	0	2	0.88	1	1.1	1509	NA	5	1	0	Low-quality	1.87	HMM-based (lower-bound)	0
k141_175021_length_2057_cov_1685.2871	lytic	low quality draft	4	0	0	0	0	1	2.21	2057	NA	4	1	0	Low-quality	3.88	AAI-based (medium-confidence)	0
k141_175073_length_2334_cov_115.3484	lysogenic	low quality draft	7	2	8	2	10.33	2	10.15	2334	NA	7	0	0	Low-quality	4.24	AAI-based (medium-confidence)	0	no viral genes detected
k141_175162_length_5279_cov_36.0000	lytic	low quality draft	8	1	4.48	4	2.44	3	11.63	5279	NA	8	4	1	Low-quality	6	HMM-based (lower-bound)	0
k141_175685_length_3123_cov_92.0000	lytic	low quality draft	7	0	0	0	0	1	0.5	3123	NA	8	0	0	Not-determined	NA	NA	0	no viral genes detected
k141_175810_length_5708_cov_51.5721	lytic	low quality draft	6	2	3.5	6	21.28	6	58.56	5708	NA	6	5	0	Low-quality	12.28	AAI-based (medium-confidence)	0
k141_175906_length_5186_cov_128.0000	lytic	low quality draft	9	2	7.23	2	11.27	2	20	5186	NA	9	0	0	Low-quality	15.01	AAI-based (high-confidence)	0	no viral genes detected
k141_177464_length_1169_cov_12.0000	lytic	low quality draft	4	0	0	1	0.3	1	0.9	1169	NA	2	2	0	Low-quality	3.57	AAI-based (medium-confidence)	0
k141_177716_length_2172_cov_326.0000	lytic	low quality draft	5	0	0	1	1.83	2	2.99	2172	NA	5	2	0	Low-quality	4.47	AAI-based (high-confidence)	0
k141_178049_length_2729_cov_47.0000	lytic	low quality draft	5	0	0	0	0	2	1.84	2729	NA	5	1	0	Low-quality	4.43	HMM-based (lower-bound)	0
k141_178074_length_1650_cov_2035.0000	lytic	low quality draft	6	1	0	0	0	1	1.35	1650	NA	6	1	0	Low-quality	2.63	HMM-based (lower-bound)	0
k141_178405_length_3006_cov_1087.0000	lysogenic	low quality draft	5	1	2.36	1	0.61	4	14.31	3006	NA	5	2	0	Low-quality	6.04	AAI-based (medium-confidence)	0
k141_178599_length_2777_cov_1387.0000	lytic	low quality draft	5	3	5.17	0	0	4	20.53	2777	1361	5	1	1	Low-quality	0.52	HMM-based (lower-bound)	50.99
k141_179048_length_1649_cov_1313.0000	lytic	low quality draft	6	0	0	1	0.23	2	0.55	1649	NA	6	0	0	Low-quality	3.23	AAI-based (medium-confidence)	0	no viral genes detected
k141_179593_length_3808_cov_2049.0000	lytic	low quality draft	8	1	2.41	5	17.55	7	31.81	3808	NA	8	5	0	Low-quality	5.22	HMM-based (lower-bound)	0
k141_18014_length_2573_cov_2610.6410	lytic	low quality draft	5	2	2.69	2	2.62	3	15.57	2573	NA	5	3	0	Low-quality	5.24	AAI-based (medium-confidence)	0
k141_180323_length_2325_cov_1206.8947	lytic	low quality draft	4	0	0	0	0	2	11	2325	NA	4	2	0	Low-quality	4.62	AAI-based (medium-confidence)	0
k141_18155_length_4446_cov_583.2671	lytic	low quality draft	7	0	0	0	0	1	3.7	4446	NA	8	0	0	Not-determined	NA	NA	0	no viral genes detected
k141_181659_length_2926_cov_154.0000	lytic	low quality draft	4	1	2.48	4	6.79	3	22.5	2926	NA	4	3	0	Low-quality	4.25	HMM-based (lower-bound)	0
k141_182934_length_2140_cov_344.0000	lytic	low quality draft	5	0	0	0	0	1	10	2140	NA	5	1	0	Low-quality	3.05	HMM-based (lower-bound)	0
k141_182973_length_3526_cov_1039.1061	lytic	low quality draft	5	0	0	1	0.72	2	12.76	3526	NA	5	1	0	Low-quality	1.54	AAI-based (medium-confidence)	0
k141_182984_length_2863_cov_1136.0000	lytic	low quality draft	6	1	4.48	1	3.03	1	10	2863	NA	6	1	0	Low-quality	1.55	HMM-based (lower-bound)	0
k141_183328_length_1387_cov_391.0000	lytic	low quality draft	4	0	0	1	0.09	1	1.23	1387	NA	4	2	0	Low-quality	2.37	HMM-based (lower-bound)	0
k141_183423_length_2417_cov_3015.0000	lytic	low quality draft	4	0	0	0	0	2	11.16	2417	NA	4	3	0	Low-quality	7.09	AAI-based (high-confidence)	0
k141_183983_length_1997_cov_860.0000	lytic	low quality draft	4	0	0	0	0	1	1.41	1997	NA	4	0	0	Low-quality	2.59	AAI-based (medium-confidence)	0	no viral genes detected
k141_184132_length_1860_cov_43.0000	lytic	low quality draft	6	0	0	0	0	1	0.09	1860	NA	6	0	0	Not-determined	NA	NA	0	no viral genes detected
k141_184145_length_1754_cov_814.0000	lytic	low quality draft	4	0	0	0	0	1	1.68	1754	NA	4	1	0	Low-quality	2.68	AAI-based (high-confidence)	0
k141_18424_length_3070_cov_80.1840	lysogenic	low quality draft	5	2	0.08	2	9.35	3	10.21	3070	NA	5	0	0	Low-quality	3.15	AAI-based (medium-confidence)	0	no viral genes detected
k141_184482_length_3740_cov_543.7319	lytic	low quality draft	4	0	0	0	0	3	1.71	3740	NA	4	2	0	Low-quality	1.57	AAI-based (medium-confidence)	0
k141_184500_length_11212_cov_135.6079	lytic	low quality draft	10	1	0.03	1	0.03	1	0.31	11212	10202	10	2	1	Low-quality	2.72	HMM-based (lower-bound)	9.01
k141_18469_length_1809_cov_1036.0000	lytic	low quality draft	4	0	0	3	3	4	2.56	1809	NA	4	3	0	Low-quality	5.4	AAI-based (medium-confidence)	0
k141_184780_length_4807_cov_2188.0000	lytic	low quality draft	9	0	0	0	0	1	1.3	4807	NA	9	3	0	Low-quality	7.71	HMM-based (lower-bound)	0
k141_184788_length_2308_cov_160.0000	lytic	low quality draft	5	0	0	2	1.86	3	6.75	2308	NA	5	5	0	Low-quality	5.38	AAI-based (high-confidence)	0
k141_18483_length_1704_cov_52.0000	lytic	low quality draft	5	0	0	1	1.87	1	10	1704	NA	5	0	0	Not-determined	NA	NA	0	no viral genes detected
k141_184926_length_5252_cov_374.6001	lytic	low quality draft	5	0	0	2	3.43	3	20.35	5252	NA	5	3	0	Low-quality	1.4	AAI-based (medium-confidence)	0
k141_18518_length_2096_cov_264.0000	lytic	low quality draft	6	0	0	1	7.58	1	10	2096	NA	7	1	0	Low-quality	1.17	HMM-based (lower-bound)	0
k141_185322_length_2473_cov_500.1136	lytic	low quality draft	5	0	0	0	0	1	0.23	2473	NA	5	1	0	Low-quality	0.93	HMM-based (lower-bound)	0
k141_185461_length_6366_cov_1846.1627	lytic	low quality draft	13	1	1.04	2	3.08	3	22.04	6366	NA	13	1	1	Low-quality	1.68	HMM-based (lower-bound)	0
k141_185889_length_4394_cov_168.0000	lytic	low quality draft	5	0	0	0	0	1	0.06	4394	NA	5	1	0	Low-quality	40.97	HMM-based (lower-bound)	0
k141_188370_length_2120_cov_1032.0000	lytic	low quality draft	5	0	0	0	0	1	10	2120	NA	5	1	0	Low-quality	4.24	AAI-based (high-confidence)	0
k141_18855_length_7557_cov_53.0000	lytic	low quality draft	9	4	4.73	7	11.54	7	17.33	7557	NA	9	8	0	Low-quality	18.69	AAI-based (high-confidence)	0
k141_188594_length_2797_cov_281.0000	lytic	low quality draft	6	0	0	2	0.26	2	6.7	2797	NA	6	0	0	Low-quality	4.53	AAI-based (medium-confidence)	0	no viral genes detected
k141_188828_length_12078_cov_279.3540	lytic	low quality draft	22	4	13.04	4	9.96	9	56.64	12078	NA	20	6	0	Low-quality	13.64	AAI-based (medium-confidence)	0
k141_188990_length_2037_cov_25.0000	lytic	low quality draft	4	0	0	1	0.51	1	1.33	2037	NA	4	0	0	Low-quality	3.71	AAI-based (medium-confidence)	0	no viral genes detected
k141_190072_length_3435_cov_1386.0000	lytic	low quality draft	5	0	0	1	2.87	1	10	3435	NA	5	2	0	Low-quality	4.74	HMM-based (lower-bound)	0
k141_190605_length_4612_cov_799.0000	lytic	low quality draft	12	1	4.3	3	8.62	5	34.72	4612	NA	12	6	0	Low-quality	4.51	AAI-based (medium-confidence)	0
k141_190637_length_2257_cov_711.0000	lytic	low quality draft	4	1	1.02	3	7.95	3	10.63	2257	NA	4	1	0	Low-quality	1.71	HMM-based (lower-bound)	0
k141_19115_length_7429_cov_51.0000	lytic	low quality draft	8	4	4.73	5	9.54	6	21.79	7429	NA	8	5	0	Low-quality	20.78	AAI-based (high-confidence)	0
k141_191157_length_1985_cov_565.0770	lytic	low quality draft	4	0	0	0	0	1	1	1985	NA	4	1	0	Low-quality	2.97	HMM-based (lower-bound)	0
k141_191642_length_3632_cov_216.0000	lytic	low quality draft	5	0	0	0	0	1	0.07	3632	NA	5	1	0	Low-quality	2.46	HMM-based (lower-bound)	0
k141_192316_length_24055_cov_248.3550	lytic	low quality draft	26	7	10.86	10	13.65	7	49.17	24055	NA	26	0	4	Low-quality	9.95	AAI-based (medium-confidence)	0	no viral genes detected
k141_192471_length_7534_cov_23.0000	lytic	low quality draft	12	4	8.83	4	9.22	6	19.48	7534	NA	12	2	0	Low-quality	13.11	AAI-based (high-confidence)	0
k141_192512_length_3544_cov_384.1881	lytic	low quality draft	4	0	0	0	0	1	0.86	3544	NA	4	0	0	Not-determined	NA	NA	0	no viral genes detected
k141_193152_length_2778_cov_77.0000	lytic	low quality draft	9	1	0.54	1	0.5	2	2	2778	NA	9	0	0	Low-quality	5.74	AAI-based (medium-confidence)	0	no viral genes detected
k141_193350_length_1893_cov_826.0000	lytic	low quality draft	4	1	0.23	1	0.21	2	7.18	1893	NA	4	0	0	Low-quality	1.47	AAI-based (medium-confidence)	0	no viral genes detected
k141_193394_length_1338_cov_913.0000	lytic	low quality draft	4	0	0	0	0	1	0.86	1338	NA	4	0	0	Not-determined	NA	NA	0	no viral genes detected
k141_193720_length_4339_cov_1485.8821	lytic	low quality draft	7	0	0	0	0	1	0.31	4339	NA	7	0	0	Not-determined	NA	NA	0	no viral genes detected
k141_193881_length_1965_cov_1091.0000	lytic	low quality draft	4	0	0	1	0.97	3	12.87	1965	NA	4	4	0	Low-quality	4.55	AAI-based (high-confidence)	0
k141_195916_length_2412_cov_371.0000	lytic	low quality draft	4	1	0.03	2	0.33	2	2.04	2412	NA	4	0	1	Not-determined	NA	NA	0	no viral genes detected
k141_196767_length_1413_cov_1830.0000	lytic	low quality draft	4	0	0	0	0	1	0.86	1413	NA	4	0	0	Low-quality	2.9	AAI-based (medium-confidence)	0	no viral genes detected
k141_197035_length_11628_cov_48.0000	lytic	low quality draft	12	2	0.96	1	1.22	4	22.18	11628	NA	13	2	0	Low-quality	4.01	HMM-based (lower-bound)	0
k141_197054_length_1175_cov_146.0000	lytic	low quality draft	4	0	0	2	0.85	2	2.49	1175	NA	4	1	0	Low-quality	1.84	AAI-based (medium-confidence)	0
k141_197408_length_1017_cov_209.0000	lytic	low quality draft	4	0	0	0	0	1	0.09	1017	NA	4	0	0	Low-quality	1.96	AAI-based (medium-confidence)	0	no viral genes detected
k141_197606_length_87868_cov_95.4518	lytic	complete circular	180	9	34.76	17	42.72	62	333.38	87868	NA	182	61	0	High-quality	100	AAI-based (high-confidence)	0
k141_197791_length_5725_cov_88.0000	lytic	low quality draft	5	0	0	0	0	1	0.86	5725	NA	5	0	0	Not-determined	NA	NA	0	no viral genes detected
k141_198495_length_10906_cov_411.0418	lytic	low quality draft	12	3	5.56	3	2.62	7	26.99	10906	NA	12	6	0	Low-quality	2.95	AAI-based (medium-confidence)	0
k141_199105_length_2066_cov_15.0000	lytic	low quality draft	4	0	0	0	0	1	4.04	2066	NA	4	0	0	Not-determined	NA	NA	0	no viral genes detected
k141_199223_length_5843_cov_191.0000	lytic	low quality draft	10	1	5.15	2	5.59	5	15.8	5843	NA	10	3	0	Low-quality	8.14	HMM-based (lower-bound)	0
k141_199368_length_2261_cov_653.6731	lytic	low quality draft	4	0	0	1	0.61	2	2.22	2261	NA	4	2	0	Low-quality	3.77	AAI-based (high-confidence)	0
k141_199412_length_10983_cov_5908.9746	lytic	low quality draft	15	5	5.94	8	12.3	9	48.94	10983	NA	15	8	0	Low-quality	23.03	AAI-based (medium-confidence)	0
k141_199421_length_24148_cov_451.6086	lytic	low quality draft	27	4	6.89	9	11.77	20	54.1	24148	NA	27	19	1	Low-quality	37.44	AAI-based (medium-confidence)	0
k141_200204_length_1030_cov_336.9989	lytic	low quality draft	4	0	0	0	0	1	0.06	1030	NA	3	0	0	Not-determined	NA	NA	0	no viral genes detected
k141_20045_length_41728_cov_100.5630	lytic	medium quality draft	58	10	11.38	7	4.58	18	86.59	41728	NA	58	6	1	Low-quality	29.93	HMM-based (lower-bound)	0
k141_201123_length_6372_cov_273.9241	lytic	low quality draft	12	2	6.89	5	14.97	6	45.49	6372	NA	12	7	0	Low-quality	5.45	HMM-based (lower-bound)	0
k141_201220_length_9607_cov_235.0000	lytic	low quality draft	15	1	0.95	5	6.18	4	21.97	9607	NA	14	7	0	Low-quality	13.56	HMM-based (lower-bound)	0
k141_202104_length_1721_cov_2682.0000	lytic	low quality draft	6	2	7.09	2	6.64	2	20	1721	NA	6	0	0	Not-determined	NA	NA	0	no viral genes detected
k141_202367_length_5503_cov_470.8506	lytic	low quality draft	10	2	6.38	4	17.44	4	22.96	5503	NA	10	3	0	Low-quality	11.4	AAI-based (high-confidence)	0
k141_202753_length_3636_cov_1483.0000	lytic	low quality draft	7	0	0	0	0	4	13.09	3636	NA	7	4	0	Low-quality	0.76	AAI-based (medium-confidence)	0
k141_202841_length_4449_cov_483.2340	lytic	low quality draft	5	0	0	0	0	1	10	4449	NA	5	0	1	Not-determined	NA	NA	0	no viral genes detected
k141_20396_length_4447_cov_31.0000	lytic	low quality draft	5	1	0.4	0	0	2	10.39	4447	NA	5	0	0	Not-determined	NA	NA	0	no viral genes detected
k141_204244_length_10296_cov_36.9906	lytic	low quality draft	13	1	4.45	2	6.62	4	15.52	10296	NA	13	3	0	Low-quality	8.56	HMM-based (lower-bound)	0
k141_204491_length_7453_cov_548.0000	lytic	low quality draft	8	0	0	0	0	1	0.86	7453	NA	8	0	0	Not-determined	NA	NA	0	no viral genes detected
k141_204570_length_1151_cov_52.0000	lytic	low quality draft	4	0	0	1	0.23	2	6.45	1151	NA	4	1	0	Low-quality	2.21	AAI-based (high-confidence)	0
k141_204626_length_6177_cov_932.8845	lytic	low quality draft	11	1	4.5	1	2.85	4	15.43	6177	NA	11	3	0	Low-quality	11.63	AAI-based (high-confidence)	0
k141_204949_length_1075_cov_42.0000	lytic	low quality draft	4	0	0	0	0	2	11.09	1075	NA	4	3	0	Low-quality	0.65	AAI-based (medium-confidence)	0
k141_205369_length_105280_cov_86.8108_fragment_1	lysogenic	low quality draft	32	5	8.2	13	24.24	18	46.19	24993	NA	31	17	3	Medium-quality	63.59	AAI-based (medium-confidence)	0
k141_205961_length_9672_cov_201.0000	lytic	low quality draft	10	0	0	5	5.05	6	29.35	9672	NA	10	7	0	Low-quality	25.41	AAI-based (medium-confidence)	0
k141_206134_length_20962_cov_152.1561	lytic	low quality draft	23	5	7.55	5	4.41	16	84.58	20962	NA	23	13	1	Low-quality	4.61	AAI-based (medium-confidence)	0
k141_206807_length_2132_cov_915.0000	lytic	low quality draft	4	0	0	0	0	1	3.56	2132	NA	4	1	0	Low-quality	0.62	HMM-based (lower-bound)	0
k141_206844_length_4120_cov_59.0000	lytic	low quality draft	7	0	0	3	3	2	1.15	4120	NA	7	0	0	Medium-quality	50.39	AAI-based (high-confidence)	0	no viral genes detected
k141_20689_length_43459_cov_200.6600	lytic	low quality draft	64	2	3.77	3	7.1	8	59.28	43459	NA	64	7	0	Medium-quality	86.6	AAI-based (medium-confidence)	0
k141_20740_length_3469_cov_295.0000	lytic	low quality draft	7	1	3.5	1	3.75	2	1.81	3469	NA	7	0	0	Low-quality	5.76	AAI-based (medium-confidence)	0	no viral genes detected
k141_207638_length_2225_cov_299.0000	lytic	low quality draft	5	0	0	1	4.15	2	5.08	2225	NA	5	3	0	Low-quality	5.56	AAI-based (medium-confidence)	0
k141_207639_length_13178_cov_56.0000	lytic	low quality draft	9	0	0	0	0	6	7.95	13178	NA	9	6	0	Low-quality	5.37	AAI-based (medium-confidence)	0
k141_207847_length_2382_cov_647.0000	lytic	low quality draft	4	0	0	0	0	1	0.79	2382	NA	4	1	0	Low-quality	3.57	HMM-based (lower-bound)	0
k141_208177_length_2502_cov_378.0000	lytic	low quality draft	4	0	0	0	0	1	0.62	2502	NA	4	3	0	Low-quality	7.34	AAI-based (medium-confidence)	0
k141_208389_length_29084_cov_168.0000	lytic	medium quality draft	42	4	8.18	21	22.4	28	123.69	29084	NA	42	26	0	Medium-quality	71.13	AAI-based (medium-confidence)	0
k141_208426_length_42738_cov_123.0160	lytic	complete circular	52	11	25.35	15	24.15	45	169.91	42738	NA	52	36	1	Complete	100	DTR (high-confidence)	0
k141_208512_length_7191_cov_367.4129	lytic	low quality draft	13	1	0.7	2	2.62	3	22.42	7191	NA	13	3	0	Low-quality	4.72	HMM-based (lower-bound)	0
k141_208542_length_1640_cov_78.4109	lytic	low quality draft	4	0	0	0	0	1	4.86	1640	NA	4	1	0	Low-quality	0.57	HMM-based (lower-bound)	0
k141_208945_length_2036_cov_46.0000	lytic	low quality draft	5	1	1.36	2	1.47	2	5.12	2036	NA	5	2	0	Low-quality	0.57	AAI-based (medium-confidence)	0
k141_209697_length_2574_cov_329.0000	lytic	low quality draft	5	0	0	0	0	2	10.32	2574	NA	4	0	0	Not-determined	NA	NA	0	no viral genes detected
k141_210072_length_1546_cov_223.0000	lytic	low quality draft	5	0	0	0	0	1	0.38	1546	NA	5	1	0	Low-quality	0.41	HMM-based (lower-bound)	0
k141_210503_length_2292_cov_371.0000	lytic	low quality draft	5	0	0	0	0	1	0.18	2292	NA	5	0	0	Not-determined	NA	NA	0	no viral genes detected
k141_210522_length_2318_cov_30.0000	lytic	low quality draft	6	2	1.93	2	0.14	3	0.81	2318	NA	6	1	0	Low-quality	2.58	AAI-based (high-confidence)	0
k141_210606_length_3480_cov_19.0000	lytic	low quality draft	5	1	0.65	1	0.66	2	3.97	3480	NA	5	2	0	Low-quality	1.32	HMM-based (lower-bound)	0
k141_2107_length_27295_cov_1123.7797	lytic	low quality draft	27	3	4.6	5	5.62	22	52.49	27295	NA	26	22	1	Medium-quality	67.88	AAI-based (high-confidence)	0
k141_210752_length_1480_cov_338.0000	lytic	low quality draft	6	0	0	1	0.29	1	7.08	1480	NA	6	1	0	Low-quality	2.96	AAI-based (high-confidence)	0
k141_211175_length_5072_cov_858.0000	lytic	low quality draft	9	0	0	1	0.27	5	8.46	5072	NA	9	6	0	Low-quality	8.45	AAI-based (high-confidence)	0
k141_211186_length_38483_cov_134.0000	lysogenic	high quality draft	58	10	20.93	26	35.24	25	106.87	38483	NA	58	29	1	Medium-quality	85.14	AAI-based (high-confidence)	0
k141_21137_length_1383_cov_74.0000	lytic	low quality draft	4	0	0	0	0	1	0.13	1383	NA	4	0	0	Not-determined	NA	NA	0	no viral genes detected
k141_211468_length_2116_cov_629.7929	lytic	low quality draft	5	0	0	0	0	1	0.14	2116	NA	4	1	0	Low-quality	4.61	HMM-based (lower-bound)	0
k141_211553_length_12920_cov_256.0000	lytic	low quality draft	26	0	0	1	1.95	2	16.82	12920	NA	26	1	0	Low-quality	3.4	HMM-based (lower-bound)	0
k141_212160_length_4219_cov_129.0000	lytic	low quality draft	5	2	9	3	7.56	5	39.59	4219	NA	5	5	0	Low-quality	11.1	AAI-based (medium-confidence)	0
k141_21219_length_7718_cov_715.0940	lytic	low quality draft	8	1	0.17	1	0.32	2	2.8	7718	NA	8	1	1	Low-quality	3.74	HMM-based (lower-bound)	0
k141_212713_length_1642_cov_2482.2212	lytic	low quality draft	4	0	0	0	0	1	0.17	1642	NA	4	0	0	Not-determined	NA	NA	0	no viral genes detected
k141_213477_length_2022_cov_3012.0000	lytic	low quality draft	5	0	0	0	0	1	1.04	2022	NA	5	2	0	Low-quality	3.87	HMM-based (lower-bound)	0
k141_213593_length_27568_cov_132.3272	lytic	medium quality draft	38	6	12.83	5	14.16	13	64.48	27568	NA	35	11	1	Low-quality	37.34	AAI-based (medium-confidence)	0
k141_213635_length_1164_cov_65.0606	lytic	low quality draft	5	0	0	0	0	1	0.39	1164	NA	5	1	0	Low-quality	2.5	AAI-based (medium-confidence)	0
k141_213963_length_1750_cov_373.0000	lytic	low quality draft	5	0	0	3	1.26	3	7.79	1750	NA	5	2	0	Low-quality	5.15	AAI-based (high-confidence)	0
k141_214458_length_2813_cov_407.0000	lytic	low quality draft	6	1	1.61	2	10.11	4	16.69	2813	NA	6	2	0	Low-quality	5.72	AAI-based (medium-confidence)	0
k141_21500_length_2619_cov_567.8709	lytic	low quality draft	8	1	0.84	2	0.86	2	2.09	2619	NA	8	0	0	Low-quality	43.58	AAI-based (medium-confidence)	0	no viral genes detected
k141_215161_length_8584_cov_31.0000	lytic	low quality draft	9	2	2.18	2	2.72	4	21.16	8584	NA	9	3	0	Low-quality	16.8	AAI-based (medium-confidence)	0
k141_215660_length_1092_cov_208.2944	lytic	low quality draft	4	0	0	1	0.22	1	3.65	1092	NA	4	0	0	Not-determined	NA	NA	0	no viral genes detected
k141_21567_length_3682_cov_38.0000	lytic	low quality draft	7	1	3.7	4	8.96	4	28.26	3682	NA	7	4	0	Low-quality	9.36	AAI-based (medium-confidence)	0
k141_215858_length_4132_cov_183.3831	lytic	low quality draft	10	0	0	0	0	2	1.28	4132	NA	11	3	0	Low-quality	2.57	HMM-based (lower-bound)	0
k141_216298_length_1749_cov_390.0000	lytic	low quality draft	4	0	0	0	0	1	0.06	1749	NA	4	1	0	Low-quality	16.31	HMM-based (lower-bound)	0
k141_216754_length_2298_cov_7.0000	lytic	low quality draft	4	1	5.15	2	12.86	2	10.81	2298	NA	4	2	0	Low-quality	2.09	HMM-based (lower-bound)	0
k141_217127_length_2713_cov_734.0000	lytic	low quality draft	5	0	0	1	0.42	2	0.88	2713	NA	5	1	0	Low-quality	0.6	HMM-based (lower-bound)	0
k141_218575_length_1432_cov_1537.0000	lytic	low quality draft	5	0	0	0	0	1	0.59	1432	NA	5	0	0	Low-quality	2.55	AAI-based (medium-confidence)	0	no viral genes detected
k141_218604_length_1242_cov_665.0000	lytic	low quality draft	6	0	0	0	0	1	0.43	1242	NA	6	1	0	Low-quality	0.36	HMM-based (lower-bound)	0
k141_218996_length_4489_cov_227.0000	lytic	low quality draft	11	0	0	0	0	1	4.11	4489	NA	11	2	0	Low-quality	1.89	HMM-based (lower-bound)	0
k141_219119_length_5016_cov_84.5227	lytic	low quality draft	7	2	2.38	3	1.39	5	25.05	5016	NA	7	4	0	Low-quality	1.7	HMM-based (lower-bound)	0
k141_220110_length_1516_cov_358.0000	lytic	low quality draft	4	0	0	0	0	2	0.24	1516	NA	4	0	0	Not-determined	NA	NA	0	no viral genes detected
k141_221182_length_1591_cov_66.0000	lytic	low quality draft	4	0	0	1	1.71	1	10	1591	NA	4	1	0	Low-quality	2.41	AAI-based (medium-confidence)	0
k141_221218_length_4394_cov_498.0000	lytic	low quality draft	7	2	1.15	1	0.94	4	5.72	4394	NA	7	2	0	Low-quality	1.22	AAI-based (medium-confidence)	0
k141_222246_length_1058_cov_548.0469	lytic	low quality draft	4	0	0	0	0	1	0.15	1058	NA	4	0	0	Low-quality	1.13	AAI-based (medium-confidence)	0	no viral genes detected
k141_22321_length_1761_cov_85.5852	lytic	low quality draft	4	0	0	0	0	1	1.25	1761	NA	4	2	0	Low-quality	1.97	AAI-based (medium-confidence)	0
k141_223243_length_2196_cov_30.0000	lytic	low quality draft	5	1	2.88	4	3.47	2	10.06	2196	NA	5	2	0	Low-quality	5.31	AAI-based (high-confidence)	0
k141_223352_length_4510_cov_679.0000	lytic	low quality draft	9	2	5.29	3	7.63	5	28.75	4510	NA	9	1	0	Low-quality	10.47	AAI-based (medium-confidence)	0
k141_22400_length_5152_cov_154.0000	lytic	low quality draft	10	0	0	0	0	1	0.06	5152	NA	10	0	0	Not-determined	NA	NA	0	no viral genes detected
k141_22500_length_1255_cov_147.0000	lytic	low quality draft	5	0	0	0	0	1	0.16	1255	NA	5	0	0	Low-quality	1.52	AAI-based (medium-confidence)	0	no viral genes detected
k141_225087_length_4615_cov_1009.2830	lytic	low quality draft	12	2	7.39	3	7.61	4	20.76	4615	NA	12	4	0	Low-quality	6.87	HMM-based (lower-bound)	0
k141_225278_length_2868_cov_1154.0000	lytic	low quality draft	5	0	0	0	0	1	1.06	2868	NA	5	1	0	Low-quality	7.45	AAI-based (medium-confidence)	0
k141_22569_length_2833_cov_1020.4465	lytic	low quality draft	5	0	0	1	1	3	25.99	2833	NA	5	5	0	Low-quality	4.45	HMM-based (lower-bound)	0
k141_225835_length_2123_cov_195.0000	lytic	low quality draft	4	0	0	2	6.12	2	11.78	2123	NA	4	2	0	Low-quality	4.59	AAI-based (high-confidence)	0
k141_225980_length_2066_cov_334.1756	lytic	low quality draft	6	0	0	0	0	1	7.01	2066	NA	6	0	0	Not-determined	NA	NA	0	no viral genes detected
k141_226077_length_3711_cov_27.0000	lytic	low quality draft	5	0	0	0	0	1	0.52	3711	NA	5	0	0	Low-quality	9.14	AAI-based (medium-confidence)	0	no viral genes detected
k141_226581_length_5125_cov_511.1635	lytic	low quality draft	9	0	0	1	2.75	2	11.53	5125	NA	9	2	0	Low-quality	8.77	HMM-based (lower-bound)	0
k141_226858_length_2860_cov_197.4634	lytic	low quality draft	5	0	0	1	0.45	1	1.27	2860	NA	5	0	2	Not-determined	NA	NA	0	no viral genes detected
k141_226999_length_3516_cov_402.0000	lytic	low quality draft	5	1	0.89	3	3.48	4	21.6	3516	NA	5	4	0	Low-quality	8.37	AAI-based (high-confidence)	0
k141_227443_length_1526_cov_72.0000	lytic	low quality draft	4	1	2.88	1	1.35	2	1.52	1526	NA	4	1	0	Low-quality	3.4	AAI-based (medium-confidence)	0
k141_227504_length_1758_cov_181.0000	lytic	low quality draft	6	0	0	0	0	1	0.99	1758	NA	6	1	0	Low-quality	0.61	HMM-based (lower-bound)	0
k141_228044_length_2874_cov_1248.0000	lytic	low quality draft	4	0	0	2	2	1	3.45	2874	NA	4	4	0	Low-quality	6.24	AAI-based (medium-confidence)	0
k141_228110_length_3657_cov_937.0000	lytic	low quality draft	6	1	0.07	2	0.68	1	6.58	3657	NA	6	2	0	Low-quality	2.5	HMM-based (lower-bound)	0
k141_228309_length_9200_cov_122.0000	lysogenic	low quality draft	9	4	6.79	4	11.83	3	20.52	9200	NA	9	0	0	Not-determined	NA	NA	0	no viral genes detected
k141_228314_length_11433_cov_241.7131	lytic	low quality draft	11	4	10.82	4	13.98	4	33.96	11433	NA	11	3	0	Low-quality	18.63	AAI-based (medium-confidence)	0
k141_22891_length_1937_cov_586.9972	lytic	low quality draft	5	2	0.51	1	0.01	3	2.29	1937	NA	5	1	0	Low-quality	3.82	AAI-based (high-confidence)	0
k141_229172_length_5220_cov_200.5989	lytic	low quality draft	6	1	0.95	4	10.33	5	29.92	5220	NA	6	5	0	Low-quality	14.41	AAI-based (high-confidence)	0
k141_229430_length_2401_cov_297.6257	lytic	low quality draft	7	1	2.08	0	0	1	10	2401	NA	7	0	0	Not-determined	NA	NA	0	no viral genes detected
k141_229528_length_3450_cov_481.0000	lytic	low quality draft	5	2	0.23	2	0.03	3	1.72	3450	NA	5	0	2	Not-determined	NA	NA	0	no viral genes detected
k141_229581_length_2902_cov_37.0000	lytic	low quality draft	5	1	2.41	4	7.82	3	21	2902	NA	5	3	1	Low-quality	6.07	AAI-based (medium-confidence)	0
k141_230168_length_2840_cov_3194.1704	lytic	low quality draft	4	0	0	2	0.24	1	1.82	2840	NA	4	1	0	Low-quality	1.01	HMM-based (lower-bound)	0
k141_230172_length_2204_cov_704.9094	lytic	low quality draft	6	1	2.88	0	0	1	10	2204	NA	6	0	0	Low-quality	3.11	AAI-based (medium-confidence)	0	no viral genes detected
k141_230726_length_14250_cov_308.0000	lytic	low quality draft	22	1	0.93	3	2.86	2	11.47	14250	NA	22	1	0	Low-quality	9.58	HMM-based (lower-bound)	0
k141_231379_length_1917_cov_131.4764	lytic	low quality draft	5	0	0	1	0.35	1	4.29	1917	NA	5	0	0	Low-quality	3.62	AAI-based (medium-confidence)	0	no viral genes detected
k141_231383_length_2469_cov_464.9502	lytic	low quality draft	4	0	0	1	2.88	1	10	2469	NA	4	1	0	Low-quality	4.65	AAI-based (medium-confidence)	0
k141_231518_length_2943_cov_75.0000	lytic	low quality draft	4	1	2.41	2	6.99	2	10.2	2943	NA	4	0	0	Not-determined	NA	NA	0	no viral genes detected
k141_231578_length_3260_cov_75.0000	lytic	low quality draft	4	1	4.45	3	6.07	3	12.36	3260	NA	4	1	0	Low-quality	2.98	AAI-based (medium-confidence)	0
k141_231812_length_9536_cov_625.5431	lysogenic	low quality draft	7	2	2.89	3	1.72	4	17.53	9536	NA	8	0	1	Not-determined	NA	NA	0	no viral genes detected
k141_231945_length_1293_cov_614.0000	lytic	low quality draft	4	0	0	0	0	1	0.6	1293	NA	4	0	0	Low-quality	2.94	AAI-based (medium-confidence)	0	no viral genes detected
k141_232604_length_67507_cov_3807.5400_fragment_1	lysogenic	low quality draft	31	9	11.62	28	38.52	26	105.83	26363	22043	31	24	2	Medium-quality	66.18	AAI-based (high-confidence)	16.39
k141_232857_length_2440_cov_257.0000	lytic	low quality draft	5	0	0	0	0	1	2.21	2440	NA	5	0	0	Not-determined	NA	NA	0	no viral genes detected
k141_233159_length_1808_cov_503.0000	lytic	low quality draft	5	0	0	0	0	2	4.18	1808	NA	5	2	0	Low-quality	3.84	AAI-based (high-confidence)	0
k141_23330_length_2147_cov_1769.4103	lytic	low quality draft	5	0	0	1	1.25	3	10.24	2147	NA	5	4	0	Low-quality	4.73	AAI-based (medium-confidence)	0
k141_233661_length_2720_cov_1975.0000	lytic	low quality draft	4	1	0.55	0	0	2	9.82	2720	NA	4	2	0	Low-quality	6.29	AAI-based (high-confidence)	0
k141_233776_length_3943_cov_435.0563	lytic	low quality draft	9	2	5.4	3	5.83	6	23.38	3943	NA	9	4	0	Low-quality	9.53	AAI-based (medium-confidence)	0
k141_233887_length_3045_cov_382.0000	lytic	low quality draft	5	0	0	0	0	1	7.01	3045	NA	5	0	0	Low-quality	1.89	AAI-based (medium-confidence)	0	no viral genes detected
k141_234330_length_3890_cov_1470.8402	lytic	low quality draft	12	1	0.31	1	0.01	1	0.15	3890	NA	12	0	0	Not-determined	NA	NA	0	no viral genes detected
k141_234346_length_2540_cov_402.9437	lytic	low quality draft	6	1	2.08	1	5.99	1	10	2540	NA	7	0	0	Not-determined	NA	NA	0	no viral genes detected
k141_234856_length_2371_cov_278.1121	lytic	low quality draft	5	0	0	0	0	1	4.15	2371	NA	5	0	0	Not-determined	NA	NA	0	no viral genes detected
k141_235725_length_1050_cov_2204.6216	lytic	low quality draft	4	0	0	1	4.26	1	2.24	1050	NA	4	1	0	Low-quality	1.6	AAI-based (high-confidence)	0
k141_236274_length_4758_cov_242.0000	lytic	low quality draft	6	1	0.29	1	0.19	1	0.72	4758	NA	6	0	1	Not-determined	NA	NA	0	no viral genes detected
k141_236669_length_1084_cov_14.0000	lytic	low quality draft	4	0	0	2	2	1	2.01	1084	NA	4	3	0	Low-quality	2.02	AAI-based (high-confidence)	0
k141_236893_length_2323_cov_498.0000	lytic	low quality draft	4	0	0	1	2.88	1	10	2323	NA	4	1	0	Low-quality	4.52	AAI-based (medium-confidence)	0
k141_237485_length_4867_cov_394.0000	lytic	low quality draft	11	1	0.95	2	7.65	4	38.56	4867	NA	11	4	0	Low-quality	10.82	AAI-based (high-confidence)	0
k141_237594_length_1782_cov_998.0000	lytic	low quality draft	5	0	0	0	0	1	3.4	1782	NA	5	2	0	Low-quality	1.1	HMM-based (lower-bound)	0
k141_237641_length_1267_cov_509.0000	lytic	low quality draft	4	1	3.84	1	3.77	2	12.29	1267	NA	4	1	0	Low-quality	1.77	AAI-based (medium-confidence)	0
k141_237645_length_2946_cov_207.0000	lytic	low quality draft	4	0	0	1	1.09	1	3.82	2946	NA	4	1	0	Low-quality	6.48	AAI-based (high-confidence)	0
k141_237881_length_4045_cov_555.0000	lytic	low quality draft	8	1	0.46	2	0.67	3	19.65	4045	NA	8	3	0	Low-quality	1.52	HMM-based (lower-bound)	0
k141_238148_length_3266_cov_743.8454	lytic	low quality draft	5	1	1.37	1	0.78	4	24.7	3266	NA	5	3	0	Low-quality	1.39	HMM-based (lower-bound)	0
k141_239140_length_4633_cov_103.0000	lytic	low quality draft	7	1	1.2	3	4.43	6	22.4	4633	NA	7	6	0	Low-quality	9.95	AAI-based (high-confidence)	0
k141_23924_length_1738_cov_122.0000	lytic	low quality draft	5	0	0	0	0	1	1.4	1738	NA	5	1	0	Low-quality	3.59	AAI-based (medium-confidence)	0
k141_239411_length_7012_cov_877.0000	lytic	low quality draft	7	0	0	0	0	4	3.23	7012	NA	7	2	0	Low-quality	2.83	AAI-based (medium-confidence)	0
k141_240298_length_2422_cov_1486.9211	lytic	low quality draft	4	0	0	1	0.41	2	1.99	2422	NA	4	3	0	Low-quality	3.54	HMM-based (lower-bound)	0
k141_240318_length_1771_cov_1826.0000	lytic	low quality draft	4	0	0	1	2.1	1	9.32	1771	NA	4	1	0	Low-quality	4.13	AAI-based (high-confidence)	0
k141_240871_length_1316_cov_49.0000	lytic	low quality draft	5	0	0	0	0	1	1.82	1316	NA	5	1	0	Low-quality	0.69	HMM-based (lower-bound)	0
k141_241125_length_1719_cov_775.0000	lytic	low quality draft	4	0	0	0	0	1	1.6	1719	NA	4	1	0	Low-quality	0.62	HMM-based (lower-bound)	0
k141_241303_length_2341_cov_108.0000	lytic	low quality draft	5	0	0	1	0.01	1	0.57	2341	NA	5	0	0	Not-determined	NA	NA	0	no viral genes detected
k141_24163_length_2262_cov_2255.6087	lytic	low quality draft	4	0	0	1	7.58	1	8.05	2262	NA	4	1	0	Low-quality	4.38	AAI-based (medium-confidence)	0
k141_242046_length_3587_cov_140.0000	lytic	low quality draft	4	1	1.86	1	1.52	3	28.39	3587	NA	4	1	0	Low-quality	2.14	AAI-based (medium-confidence)	0
k141_242349_length_1820_cov_147.0000	lytic	low quality draft	4	0	0	0	0	2	1.85	1820	NA	4	1	0	Low-quality	1.71	HMM-based (lower-bound)	0
k141_243297_length_2369_cov_22.0000	lytic	low quality draft	5	0	0	0	0	1	2.21	2369	NA	5	0	0	Not-determined	NA	NA	0	no viral genes detected
k141_243718_length_1788_cov_457.4177	lytic	low quality draft	4	0	0	0	0	1	2.29	1788	NA	4	1	0	Low-quality	1.76	HMM-based (lower-bound)	0
k141_244114_length_2581_cov_501.0000	lytic	low quality draft	4	0	0	3	4.88	3	13.29	2581	NA	4	3	0	Low-quality	6.92	AAI-based (high-confidence)	0
k141_244253_length_234505_cov_60.0000	lytic	high quality draft	245	11	12.82	11	13.56	129	283.42	234505	NA	238	98	0	High-quality	98.64	AAI-based (high-confidence)	0
k141_245518_length_3057_cov_637.3519	lytic	low quality draft	4	0	0	1	0.36	1	1.24	3057	NA	4	0	0	Low-quality	5.71	AAI-based (high-confidence)	0	no viral genes detected
k141_246639_length_1651_cov_3060.7987	lytic	low quality draft	5	0	0	0	0	1	0.86	1651	NA	5	1	0	Low-quality	3.26	AAI-based (medium-confidence)	0
k141_246783_length_4722_cov_168.0000	lytic	low quality draft	8	0	0	1	2.88	2	10.79	4722	NA	8	2	0	Low-quality	9.36	AAI-based (medium-confidence)	0
k141_246869_length_1876_cov_18.0000	lytic	low quality draft	6	1	1.65	3	1.89	4	11.05	1876	NA	6	0	0	Low-quality	5.93	AAI-based (high-confidence)	0	no viral genes detected
k141_247955_length_4445_cov_110.0000	lytic	low quality draft	10	2	1.67	2	2.16	3	20.7	4445	NA	10	2	0	Low-quality	1.44	AAI-based (medium-confidence)	0
k141_248163_length_2900_cov_2114.0000	lytic	low quality draft	5	0	0	0	0	2	1.46	2900	NA	5	1	0	Low-quality	0.83	HMM-based (lower-bound)	0
k141_24826_length_2354_cov_1281.7325	lytic	low quality draft	5	0	0	1	1.25	3	9.84	2354	NA	5	3	0	Low-quality	4.13	HMM-based (lower-bound)	0
k141_248552_length_4162_cov_116.0000	lytic	low quality draft	4	1	2.41	4	11.06	4	38.56	4162	NA	4	4	0	Low-quality	10.55	AAI-based (high-confidence)	0
k141_248689_length_3544_cov_451.9806	lysogenic	low quality draft	6	1	7	2	9.84	3	15.83	3544	NA	6	2	0	Low-quality	8.15	AAI-based (high-confidence)	0
k141_248877_length_2434_cov_447.4762	lytic	low quality draft	6	0	0	0	0	2	1.95	2434	NA	6	2	0	Low-quality	4.28	HMM-based (lower-bound)	0
k141_249389_length_15987_cov_548.0282	lytic	low quality draft	28	3	2.07	3	2.15	5	6.89	15987	NA	28	2	1	Low-quality	6.01	HMM-based (lower-bound)	0
k141_249702_length_2997_cov_1129.7647	lytic	low quality draft	7	0	0	0	0	1	0.63	2997	NA	8	0	0	Not-determined	NA	NA	0	no viral genes detected
k141_250053_length_2018_cov_95.0000	lytic	low quality draft	5	0	0	0	0	2	0.1	2018	NA	5	0	0	Low-quality	4.02	AAI-based (high-confidence)	0	no viral genes detected
k141_250312_length_2368_cov_747.6089	lytic	low quality draft	4	0	0	0	0	1	1.23	2368	NA	4	2	0	Low-quality	4.04	HMM-based (lower-bound)	0
[truncated: 7,034 more rows]

## Sheet: Table_S2
Table S2: Overview of the final data set based on comparison across the findings from all three tested software (VIBRANT, DeepVirFinder, VirSorter2) and cutting off the redundancy.
VIBRANT and CheckV													Cenote-Taker 2
contig_id	type	Quality-VIBRANT	contig_length	provirus	proviral_length	gene_count	viral_genes	host_genes	checkv_quality	miuvig_quality	completeness_method	contamination	CENOTE_NAME	END_FEATURE	ORF_CALLER	NUM_HALLMARKS
k141_1000083_length_5613_cov_69.0000	lytic	low quality draft	5613	No	NA	8	2	0	Low-quality	Genome-fragment	AAI-based (medium-confidence)	0	viruses_nov858	None	PHANOTATE	0
k141_1000881_length_6453_cov_135.8877	lytic	low quality draft	6453	No	NA	10	7	0	Low-quality	Genome-fragment	HMM-based (lower-bound)	0	viruses_nov1022	None	PHANOTATE	1
k141_1001602_length_2024_cov_18.0000	lytic	low quality draft	2024	No	NA	4	3	0	Low-quality	Genome-fragment	AAI-based (high-confidence)	0	viruses_nov2668	None	PHANOTATE	0
k141_100250_length_5764_cov_585.4023	lytic	low quality draft	5764	No	NA	6	4	0	Low-quality	Genome-fragment	AAI-based (medium-confidence)	0	viruses_nov2088	None	PHANOTATE	2
k141_100303_length_2629_cov_64.0000	lytic	low quality draft	2629	No	NA	4	1	0	Low-quality	Genome-fragment	AAI-based (medium-confidence)	0	viruses_nov2337	None	PHANOTATE	0
k141_100320_length_7332_cov_599.2357	lytic	low quality draft	7332	No	NA	6	1	0	Low-quality	Genome-fragment	HMM-based (lower-bound)	0	viruses_nov1972	None	PHANOTATE	0
k141_1003355_length_4716_cov_1120.4230	lytic	low quality draft	4716	No	NA	5	1	0	Low-quality	Genome-fragment	HMM-based (lower-bound)	0	viruses_nov2531	None	PHANOTATE	0
k141_1003808_length_1364_cov_163.0000	lytic	low quality draft	1364	No	NA	4	1	0	Low-quality	Genome-fragment	HMM-based (lower-bound)	0	viruses_nov1361	None	PHANOTATE	0
k141_1003919_length_3982_cov_60.0000	lytic	low quality draft	3982	No	NA	12	1	0	Low-quality	Genome-fragment	HMM-based (lower-bound)	0	viruses_nov71	None	PHANOTATE	1
k141_1003978_length_5115_cov_51.0000	lytic	low quality draft	5115	No	NA	8	0	0	Not-determined	Genome-fragment	NA	0	viruses_nov2806	None	PHANOTATE	0
k141_1003996_length_1015_cov_12.0000	lytic	low quality draft	1015	No	NA	5	1	0	Low-quality	Genome-fragment	AAI-based (high-confidence)	0	viruses_nov1251	None	PHANOTATE	0
k141_10041_length_7664_cov_17.0000	lytic	low quality draft	7664	No	NA	6	3	0	Low-quality	Genome-fragment	AAI-based (medium-confidence)	0	viruses_nov1632	None	PHANOTATE	1
k141_1004794_length_8289_cov_19.0000	lytic	low quality draft	8289	No	NA	14	9	1	Low-quality	Genome-fragment	AAI-based (high-confidence)	0	viruses_nov2610	None	PHANOTATE	5
k141_10051_length_3378_cov_240.0000	lytic	low quality draft	3378	No	NA	4	4	0	Low-quality	Genome-fragment	AAI-based (high-confidence)	0	viruses_nov2013	None	PHANOTATE	3
k141_100608_length_3384_cov_75.0025	lytic	low quality draft	3384	No	NA	11	3	0	Low-quality	Genome-fragment	AAI-based (medium-confidence)	0	viruses_nov1609	None	PHANOTATE	0
k141_1006301_length_3614_cov_61.0000	lytic	low quality draft	3614	No	NA	4	1	0	Low-quality	Genome-fragment	HMM-based (lower-bound)	0	viruses_nov690	None	PHANOTATE	0
k141_1006623_length_15856_cov_309.0000	lytic	low quality draft	15856	No	NA	17	8	0	Low-quality	Genome-fragment	AAI-based (medium-confidence)	0	viruses_nov84	None	PHANOTATE	0
k141_1007402_length_5812_cov_699.9104	lytic	low quality draft	5812	No	NA	9	1	0	Low-quality	Genome-fragment	HMM-based (lower-bound)	0	viruses_nov1477	None	PHANOTATE	0
k141_100781_length_2853_cov_601.0000	lytic	low quality draft	2853	No	NA	6	3	0	Low-quality	Genome-fragment	HMM-based (lower-bound)	0	viruses_nov741	None	Prodigal	0
k141_1008433_length_22326_cov_53.0000	lytic	low quality draft	22326	No	NA	27	3	0	Low-quality	Genome-fragment	AAI-based (medium-confidence)	0	viruses_nov893	None	PHANOTATE	1
k141_1009000_length_11266_cov_1087.5276	lytic	low quality draft	11266	No	NA	7	3	0	Low-quality	Genome-fragment	HMM-based (lower-bound)	0	viruses_nov2298	None	PHANOTATE	0
k141_1009233_length_1829_cov_102.0000	lytic	low quality draft	1829	No	NA	5	2	0	Low-quality	Genome-fragment	HMM-based (lower-bound)	0	viruses_nov548	None	PHANOTATE	0
k141_1010362_length_1454_cov_729.0000	lytic	low quality draft	1454	No	NA	4	3	0	Low-quality	Genome-fragment	HMM-based (lower-bound)	0	viruses_nov2410	None	PHANOTATE	3
k141_101061_length_3016_cov_17.0000	lytic	low quality draft	3016	No	NA	5	5	0	Low-quality	Genome-fragment	HMM-based (lower-bound)	0	viruses_nov2413	None	PHANOTATE	4
k141_1010745_length_4029_cov_392.4833	lytic	low quality draft	4029	No	NA	10	10	0	Low-quality	Genome-fragment	AAI-based (high-confidence)	0	viruses_nov2987	None	PHANOTATE	0
k141_1010776_length_2115_cov_280.1297	lytic	low quality draft	2115	No	NA	5	1	0	Low-quality	Genome-fragment	HMM-based (lower-bound)	0	viruses_nov550	None	PHANOTATE	0
k141_1011010_length_4589_cov_162.9798	lytic	low quality draft	4589	No	NA	5	1	0	Low-quality	Genome-fragment	HMM-based (lower-bound)	0	viruses_nov502	None	PHANOTATE	0
k141_1011946_length_2892_cov_801.0000	lytic	low quality draft	2892	No	NA	6	2	0	Low-quality	Genome-fragment	HMM-based (lower-bound)	0	viruses_nov448	None	PHANOTATE	0
k141_1012312_length_1353_cov_7.0000	lytic	low quality draft	1353	No	NA	4	2	0	Low-quality	Genome-fragment	HMM-based (lower-bound)	0	viruses_nov607	None	PHANOTATE	0
k141_1012316_length_4501_cov_129.0000	lytic	low quality draft	4501	No	NA	4	2	0	Low-quality	Genome-fragment	AAI-based (high-confidence)	0	viruses_nov2305	None	PHANOTATE	2
k141_1012386_length_1431_cov_26.0000	lytic	low quality draft	1431	No	NA	5	1	0	Low-quality	Genome-fragment	AAI-based (medium-confidence)	0	viruses_nov2643	None	PHANOTATE	0
k141_1012705_length_4370_cov_330.2731	lytic	low quality draft	4370	No	NA	6	4	0	Low-quality	Genome-fragment	AAI-based (medium-confidence)	0	viruses_nov2919	None	PHANOTATE	0
k141_1012846_length_3842_cov_257.0000	lytic	low quality draft	3842	No	NA	6	2	0	Low-quality	Genome-fragment	AAI-based (medium-confidence)	0	viruses_nov2801	None	PHANOTATE	1
k141_1013157_length_3949_cov_309.0000	lytic	low quality draft	3949	No	NA	10	2	0	Low-quality	Genome-fragment	HMM-based (lower-bound)	0	viruses_nov2588	None	PHANOTATE	0
k141_1013185_length_15078_cov_404.9130	lytic	medium quality draft	15078	No	NA	29	2	0	Low-quality	Genome-fragment	HMM-based (lower-bound)	0	viruses_nov720	None	PHANOTATE	3
k141_1013196_length_3804_cov_1308.0000	lytic	low quality draft	3804	No	NA	5	1	0	Low-quality	Genome-fragment	AAI-based (medium-confidence)	0	viruses_nov1061	None	PHANOTATE	0
k141_101352_length_4336_cov_148.0000	lytic	low quality draft	4336	No	NA	5	4	0	Low-quality	Genome-fragment	AAI-based (high-confidence)	0	viruses_nov1062	None	PHANOTATE	0
k141_1013646_length_6696_cov_503.5515	lytic	low quality draft	6696	No	NA	6	1	0	Low-quality	Genome-fragment	HMM-based (lower-bound)	0	viruses_nov513	None	PHANOTATE	1
k141_1013800_length_4490_cov_135.0000	lytic	low quality draft	1647	No	NA	4	0	1	Low-quality	Genome-fragment	AAI-based (medium-confidence)	0	viruses_nov53	None	Prodigal	0
k141_101389_length_13738_cov_33.9442	lysogenic	low quality draft	13738	No	NA	18	3	0	Low-quality	Genome-fragment	HMM-based (lower-bound)	0	viruses_nov2160	None	PHANOTATE	2
k141_1015848_length_28626_cov_135.0918	lytic	medium quality draft	28626	No	NA	32	6	0	Low-quality	Genome-fragment	HMM-based (lower-bound)	0	viruses_nov1547	None	PHANOTATE	0
k141_1017549_length_3581_cov_1207.9924	lytic	low quality draft	3581	No	NA	5	0	0	Not-determined	Genome-fragment	NA	0	viruses_nov1552	None	PHANOTATE	0
k141_1017707_length_3270_cov_12.0000	lytic	low quality draft	3270	No	NA	6	2	0	Low-quality	Genome-fragment	AAI-based (medium-confidence)	0	viruses_nov2472	None	PHANOTATE	0
k141_1019057_length_7629_cov_163.0000	lytic	low quality draft	7629	No	NA	12	5	0	Low-quality	Genome-fragment	HMM-based (lower-bound)	0	viruses_nov1383	None	PHANOTATE	4
k141_1019427_length_1404_cov_803.0000	lytic	low quality draft	1404	No	NA	4	4	0	Low-quality	Genome-fragment	AAI-based (high-confidence)	0	viruses_nov3035	None	PHANOTATE	0
k141_101994_length_3705_cov_85.1313	lytic	low quality draft	3705	No	NA	6	2	0	Low-quality	Genome-fragment	AAI-based (medium-confidence)	0	viruses_nov1666	None	PHANOTATE	1
k141_1020320_length_1154_cov_245.0000	lytic	low quality draft	1154	No	NA	4	1	0	Low-quality	Genome-fragment	AAI-based (medium-confidence)	0	viruses_nov442	None	PHANOTATE	0
k141_102045_length_6101_cov_846.0000	lytic	low quality draft	6101	No	NA	13	4	0	Low-quality	Genome-fragment	HMM-based (lower-bound)	0	viruses_nov2765	None	PHANOTATE	0
k141_1020540_length_4978_cov_115.0000	lytic	low quality draft	4978	No	NA	9	6	0	Low-quality	Genome-fragment	HMM-based (lower-bound)	0	viruses_nov2994	None	PHANOTATE	3
k141_1020856_length_19037_cov_3343.8807	lytic	low quality draft	19037	No	NA	26	10	0	Low-quality	Genome-fragment	AAI-based (medium-confidence)	0	viruses_nov2821	None	PHANOTATE	4
k141_1021014_length_2087_cov_53.0000	lytic	low quality draft	2087	No	NA	5	1	0	Low-quality	Genome-fragment	HMM-based (lower-bound)	0	viruses_nov1015	None	PHANOTATE	0
k141_1022668_length_1882_cov_846.0557	lytic	low quality draft	1882	No	NA	4	3	0	Low-quality	Genome-fragment	HMM-based (lower-bound)	0	viruses_nov1321	None	PHANOTATE	3
k141_1024358_length_29243_cov_44.0000	lytic	low quality draft	29243	No	NA	35	2	0	Low-quality	Genome-fragment	HMM-based (lower-bound)	0	viruses_nov348	None	PHANOTATE	0
k141_102487_length_1970_cov_154.0000	lytic	low quality draft	1970	No	NA	5	2	0	Low-quality	Genome-fragment	AAI-based (medium-confidence)	0	viruses_nov2428	None	PHANOTATE	0
k141_1025030_length_3179_cov_1097.9954	lytic	low quality draft	3179	No	NA	11	9	0	Low-quality	Genome-fragment	AAI-based (high-confidence)	0	viruses_nov2368	None	PHANOTATE	0
k141_1026298_length_5395_cov_66.0000	lytic	low quality draft	5395	No	NA	7	2	0	Low-quality	Genome-fragment	HMM-based (lower-bound)	0	viruses_nov2411	None	PHANOTATE	0
k141_1027746_length_13664_cov_437.0815	lytic	low quality draft	13664	No	NA	12	11	0	Low-quality	Genome-fragment	AAI-based (medium-confidence)	0	viruses_nov1225	None	PHANOTATE	0
k141_102780_length_3457_cov_109.0000	lytic	low quality draft	3457	No	NA	5	2	0	Low-quality	Genome-fragment	HMM-based (lower-bound)	0	viruses_nov327	None	PHANOTATE	1
k141_1027935_length_2266_cov_964.0000	lytic	low quality draft	2266	No	NA	6	1	0	Low-quality	Genome-fragment	HMM-based (lower-bound)	0	viruses_nov636	None	PHANOTATE	0
k141_1028047_length_9784_cov_205.3321	lytic	low quality draft	9784	No	NA	9	2	0	Low-quality	Genome-fragment	HMM-based (lower-bound)	0	viruses_nov570	None	PHANOTATE	0
k141_102839_length_8667_cov_704.4156	lytic	low quality draft	8667	No	NA	13	4	1	Low-quality	Genome-fragment	AAI-based (medium-confidence)	0	viruses_nov869	None	PHANOTATE	0
k141_1028478_length_4212_cov_622.0000	lytic	low quality draft	4212	No	NA	8	1	0	Low-quality	Genome-fragment	HMM-based (lower-bound)	0	viruses_nov1230	None	PHANOTATE	0
k141_1028649_length_3375_cov_23.0000	lytic	low quality draft	3375	No	NA	8	1	0	Low-quality	Genome-fragment	HMM-based (lower-bound)	0	viruses_nov2864	None	PHANOTATE	0
k141_103043_length_26541_cov_285.0069	lytic	low quality draft	26541	No	NA	26	16	0	Low-quality	Genome-fragment	AAI-based (medium-confidence)	0	viruses_nov1003	None	PHANOTATE	2
k141_1030659_length_2072_cov_495.0000	lytic	low quality draft	2072	No	NA	5	1	0	Low-quality	Genome-fragment	AAI-based (medium-confidence)	0	viruses_nov2424	None	PHANOTATE	0
k141_1030859_length_35630_cov_72.0000	lytic	high quality draft	35630	No	NA	26	10	0	Low-quality	Genome-fragment	AAI-based (high-confidence)	0	viruses_nov2452	None	PHANOTATE	3
k141_1031091_length_2651_cov_561.2562	lytic	low quality draft	2651	No	NA	8	0	0	Low-quality	Genome-fragment	AAI-based (medium-confidence)	0	viruses_nov181	None	PHANOTATE	0
k141_1031176_length_4946_cov_696.0333	lytic	low quality draft	4946	No	NA	8	4	0	Low-quality	Genome-fragment	HMM-based (lower-bound)	0	viruses_nov2384	None	PHANOTATE	2
k141_1031528_length_2225_cov_508.0000	lytic	low quality draft	2225	No	NA	7	4	0	Low-quality	Genome-fragment	AAI-based (high-confidence)	0	viruses_nov610	None	PHANOTATE	0
k141_1032718_length_4087_cov_144.0000	lytic	low quality draft	4087	No	NA	6	2	0	Low-quality	Genome-fragment	HMM-based (lower-bound)	0	viruses_nov1174	None	PHANOTATE	0
k141_1034141_length_4470_cov_633.0000	lytic	low quality draft	4470	No	NA	12	1	0	Low-quality	Genome-fragment	HMM-based (lower-bound)	0	viruses_nov1541	None	PHANOTATE	2
k141_1034901_length_1597_cov_47.0000	lytic	low quality draft	1597	No	NA	4	3	0	Low-quality	Genome-fragment	AAI-based (high-confidence)	0	viruses_nov2295	None	PHANOTATE	2
k141_103500_length_3289_cov_38.7611	lytic	low quality draft	3289	No	NA	7	2	0	Low-quality	Genome-fragment	HMM-based (lower-bound)	0	viruses_nov1725	None	PHANOTATE	0
k141_103546_length_1191_cov_441.0000	lytic	low quality draft	1191	No	NA	4	0	0	Not-determined	Genome-fragment	NA	0	viruses_nov2653	None	PHANOTATE	0
k141_1038440_length_4026_cov_199.0000	lytic	low quality draft	4026	No	NA	10	3	0	Low-quality	Genome-fragment	HMM-based (lower-bound)	0	viruses_nov2278	None	PHANOTATE	0
k141_1038586_length_5009_cov_14.0000	lytic	low quality draft	5009	No	NA	5	5	0	Low-quality	Genome-fragment	AAI-based (high-confidence)	0	viruses_nov940	None	PHANOTATE	1
k141_1039057_length_1639_cov_215.0000	lytic	low quality draft	1639	No	NA	4	1	0	Low-quality	Genome-fragment	HMM-based (lower-bound)	0	viruses_nov121	None	PHANOTATE	0
k141_1039310_length_17314_cov_308.2960	lytic	low quality draft	17314	No	NA	7	3	0	Low-quality	Genome-fragment	AAI-based (high-confidence)	0	viruses_nov540	None	PHANOTATE	2
k141_1039707_length_16068_cov_202.1462	lytic	medium quality draft	16068	No	NA	12	4	0	Low-quality	Genome-fragment	AAI-based (high-confidence)	0	viruses_nov1307	None	PHANOTATE	1
k141_1039841_length_2225_cov_1059.0000	lytic	low quality draft	2225	No	NA	4	3	0	Low-quality	Genome-fragment	AAI-based (high-confidence)	0	viruses_nov2425	None	PHANOTATE	3
k141_1040071_length_11237_cov_272.0000	lysogenic	low quality draft	11237	No	NA	22	2	1	Low-quality	Genome-fragment	AAI-based (medium-confidence)	0	viruses_nov507	None	PHANOTATE	2
k141_1041080_length_2958_cov_21.0000	lytic	low quality draft	2958	No	NA	4	2	0	Low-quality	Genome-fragment	HMM-based (lower-bound)	0	viruses_nov257	None	PHANOTATE	0
k141_1041501_length_2068_cov_12.0000	lytic	low quality draft	2068	No	NA	5	2	0	Low-quality	Genome-fragment	HMM-based (lower-bound)	0	viruses_nov1209	None	PHANOTATE	0
k141_1041600_length_22909_cov_43.0000	lytic	low quality draft	22909	No	NA	34	12	1	Low-quality	Genome-fragment	HMM-based (lower-bound)	0	viruses_nov2318	None	PHANOTATE	6
k141_1041771_length_3177_cov_17.0000	lytic	low quality draft	3177	No	NA	4	2	0	Low-quality	Genome-fragment	AAI-based (high-confidence)	0	viruses_nov1051	None	PHANOTATE	1
k141_1042978_length_3531_cov_228.4363	lytic	low quality draft	3531	No	NA	6	3	0	Low-quality	Genome-fragment	HMM-based (lower-bound)	0	viruses_nov459	None	PHANOTATE	0
k141_1043244_length_3896_cov_560.5952	lytic	low quality draft	3896	No	NA	12	4	0	Low-quality	Genome-fragment	HMM-based (lower-bound)	0	viruses_nov1161	None	PHANOTATE	0
k141_1043644_length_4713_cov_266.0000	lytic	low quality draft	4713	No	NA	8	2	0	Low-quality	Genome-fragment	AAI-based (high-confidence)	0	viruses_nov1217	None	PHANOTATE	0
k141_1044056_length_1780_cov_76.0000	lytic	low quality draft	1780	No	NA	5	2	0	Low-quality	Genome-fragment	AAI-based (medium-confidence)	0	viruses_nov2717	None	PHANOTATE	0
k141_1045252_length_9031_cov_667.5520	lytic	low quality draft	9031	No	NA	10	6	0	Low-quality	Genome-fragment	AAI-based (medium-confidence)	0	viruses_nov12	None	PHANOTATE	3
k141_1045370_length_1892_cov_37.0154	lytic	low quality draft	1892	No	NA	4	0	0	Not-determined	Genome-fragment	NA	0	viruses_nov1478	None	PHANOTATE	0
k141_1045409_length_4138_cov_1567.3880	lytic	low quality draft	4138	No	NA	5	1	0	Low-quality	Genome-fragment	HMM-based (lower-bound)	0	viruses_nov2389	None	PHANOTATE	0
k141_1045910_length_3186_cov_413.0000	lytic	low quality draft	3186	No	NA	9	2	0	Low-quality	Genome-fragment	AAI-based (medium-confidence)	0	viruses_nov2909	None	PHANOTATE	0
k141_1046255_length_2918_cov_16.0000	lytic	low quality draft	2918	No	NA	6	5	0	Low-quality	Genome-fragment	AAI-based (medium-confidence)	0	viruses_nov2862	None	PHANOTATE	5
k141_104796_length_1814_cov_11.0000	lytic	low quality draft	1814	No	NA	4	1	0	Low-quality	Genome-fragment	AAI-based (medium-confidence)	0	viruses_nov2287	None	PHANOTATE	0
k141_1048203_length_3428_cov_70.0000	lytic	low quality draft	3428	No	NA	8	3	0	Low-quality	Genome-fragment	HMM-based (lower-bound)	0	viruses_nov910	None	PHANOTATE	0
k141_1048477_length_1093_cov_55.0000	lytic	low quality draft	1093	No	NA	4	1	0	Low-quality	Genome-fragment	AAI-based (medium-confidence)	0	viruses_nov2275	None	PHANOTATE	0
k141_1048501_length_2389_cov_12.0000	lytic	low quality draft	2389	No	NA	7	1	0	Low-quality	Genome-fragment	AAI-based (high-confidence)	0	viruses_nov1462	None	PHANOTATE	0
k141_1048607_length_2921_cov_413.8716	lytic	low quality draft	2921	No	NA	5	1	0	Low-quality	Genome-fragment	AAI-based (high-confidence)	0	viruses_nov2620	None	PHANOTATE	0
k141_1048779_length_4013_cov_542.2776	lytic	low quality draft	4013	No	NA	6	1	0	Low-quality	Genome-fragment	HMM-based (lower-bound)	0	viruses_nov2300	None	PHANOTATE	1
k141_1049103_length_2317_cov_17.0000	lytic	low quality draft	2317	No	NA	6	1	0	Low-quality	Genome-fragment	HMM-based (lower-bound)	0	viruses_nov2680	None	PHANOTATE	0
k141_1052101_length_4707_cov_206.0000	lytic	low quality draft	4707	No	NA	14	2	0	Low-quality	Genome-fragment	HMM-based (lower-bound)	0	viruses_nov183	None	PHANOTATE	0
k141_1053506_length_2434_cov_20.0000	lytic	low quality draft	2434	No	NA	5	0	0	Not-determined	Genome-fragment	NA	0	viruses_nov197	None	PHANOTATE	0
k141_105469_length_3366_cov_8.0000	lytic	low quality draft	3366	No	NA	6	3	0	Low-quality	Genome-fragment	AAI-based (high-confidence)	0	viruses_nov1797	None	PHANOTATE	1
k141_1054970_length_2432_cov_988.7490	lytic	low quality draft	2432	No	NA	4	1	0	Low-quality	Genome-fragment	AAI-based (medium-confidence)	0	viruses_nov924	None	PHANOTATE	0
k141_1055229_length_7183_cov_1645.3465	lytic	low quality draft	7183	No	NA	6	2	0	Low-quality	Genome-fragment	HMM-based (lower-bound)	0	viruses_nov2730	None	PHANOTATE	0
k141_1056223_length_7539_cov_134.0000	lytic	low quality draft	7539	No	NA	10	6	0	Low-quality	Genome-fragment	AAI-based (medium-confidence)	0	viruses_nov623	None	PHANOTATE	3
k141_1056491_length_3461_cov_948.0000	lytic	low quality draft	3461	No	NA	7	2	0	Low-quality	Genome-fragment	HMM-based (lower-bound)	0	viruses_nov2749	None	PHANOTATE	1
k141_1056882_length_2213_cov_23.0000	lytic	low quality draft	2213	No	NA	6	5	0	Low-quality	Genome-fragment	AAI-based (high-confidence)	0	viruses_nov2791	None	PHANOTATE	4
k141_1057040_length_1711_cov_450.3197	lytic	low quality draft	1711	No	NA	4	0	0	Not-determined	Genome-fragment	NA	0	viruses_nov2776	None	PHANOTATE	0
k141_1057499_length_1694_cov_38.0000	lytic	low quality draft	1694	No	NA	4	4	0	Low-quality	Genome-fragment	AAI-based (medium-confidence)	0	viruses_nov752	None	PHANOTATE	0
k141_105759_length_9085_cov_281.0000	lytic	low quality draft	9085	No	NA	13	8	0	Low-quality	Genome-fragment	AAI-based (high-confidence)	0	viruses_nov1515	None	PHANOTATE	6
k141_1058164_length_4251_cov_1664.0000	lytic	low quality draft	4251	No	NA	7	1	0	Low-quality	Genome-fragment	HMM-based (lower-bound)	0	viruses_nov1074	None	PHANOTATE	0
k141_1058577_length_1513_cov_1446.9045	lytic	low quality draft	1513	No	NA	4	4	0	Low-quality	Genome-fragment	AAI-based (high-confidence)	0	viruses_nov2246	None	PHANOTATE	0
k141_1059748_length_42851_cov_84.0000	lytic	low quality draft	42851	No	NA	52	37	2	High-quality	High-quality	AAI-based (high-confidence)	0	viruses_nov2952	None	PHANOTATE	16
k141_1061574_length_1319_cov_323.8285	lytic	low quality draft	1319	No	NA	5	1	0	Low-quality	Genome-fragment	AAI-based (medium-confidence)	0	viruses_nov199	None	PHANOTATE	0
k141_1061841_length_6609_cov_336.5320	lytic	low quality draft	6609	No	NA	7	6	0	Low-quality	Genome-fragment	AAI-based (medium-confidence)	0	viruses_nov1187	None	PHANOTATE	3
k141_1062287_length_2416_cov_23.0000	lytic	low quality draft	2416	No	NA	5	0	0	Not-determined	Genome-fragment	NA	0	viruses_nov2830	None	PHANOTATE	0
k141_1062909_length_2517_cov_10.0000	lytic	low quality draft	2517	No	NA	6	1	1	Low-quality	Genome-fragment	AAI-based (medium-confidence)	0	viruses_nov806	None	PHANOTATE	0
k141_106291_length_19483_cov_245.1790	lytic	low quality draft	19483	No	NA	28	3	1	Low-quality	Genome-fragment	HMM-based (lower-bound)	0	viruses_nov698	None	PHANOTATE	0
k141_1063237_length_1572_cov_1252.2586	lytic	low quality draft	1572	No	NA	4	2	0	Low-quality	Genome-fragment	HMM-based (lower-bound)	0	viruses_nov524	None	PHANOTATE	0
k141_1063260_length_4346_cov_28.0000	lytic	low quality draft	4346	No	NA	6	2	0	Low-quality	Genome-fragment	AAI-based (medium-confidence)	0	viruses_nov3007	None	PHANOTATE	0
k141_1063294_length_3286_cov_1128.0350	lytic	low quality draft	3286	No	NA	7	2	0	Low-quality	Genome-fragment	AAI-based (medium-confidence)	0	viruses_nov785	None	PHANOTATE	0
k141_106394_length_3135_cov_1198.0000	lytic	low quality draft	3135	No	NA	7	4	0	Low-quality	Genome-fragment	HMM-based (lower-bound)	0	viruses_nov3028	None	PHANOTATE	1
k141_1064082_length_7891_cov_68.0000	lytic	low quality draft	7891	No	NA	8	3	0	Low-quality	Genome-fragment	AAI-based (medium-confidence)	0	viruses_nov2294	None	PHANOTATE	2
k141_1064361_length_31829_cov_97.9378	lytic	low quality draft	31829	No	NA	28	3	0	Low-quality	Genome-fragment	HMM-based (lower-bound)	0	viruses_nov856	None	PHANOTATE	3
k141_1064681_length_4917_cov_23.0000	lytic	low quality draft	4917	No	NA	6	5	0	Low-quality	Genome-fragment	AAI-based (high-confidence)	0	viruses_nov496	None	PHANOTATE	2
k141_106503_length_2957_cov_68.0000	lytic	low quality draft	2957	No	NA	5	1	0	Low-quality	Genome-fragment	AAI-based (high-confidence)	0	viruses_nov2325	None	PHANOTATE	0
k141_106528_length_2691_cov_136.0000	lytic	low quality draft	2691	No	NA	4	0	0	Not-determined	Genome-fragment	NA	0	viruses_nov776	None	PHANOTATE	0
k141_106566_length_8227_cov_430.4686	lytic	low quality draft	8227	No	NA	19	6	0	Low-quality	Genome-fragment	HMM-based (lower-bound)	0	viruses_nov2550	None	PHANOTATE	1
k141_1066050_length_7430_cov_33.0000	lytic	low quality draft	7430	No	NA	9	3	0	Low-quality	Genome-fragment	AAI-based (medium-confidence)	0	viruses_nov1193	None	PHANOTATE	3
k141_1067199_length_4949_cov_507.6358	lytic	low quality draft	4949	No	NA	5	0	0	Low-quality	Genome-fragment	AAI-based (medium-confidence)	0	viruses_nov884	None	PHANOTATE	0
k141_1068049_length_1348_cov_16.0000	lytic	low quality draft	1348	No	NA	4	1	0	Low-quality	Genome-fragment	AAI-based (medium-confidence)	0	viruses_nov2347	None	PHANOTATE	0
k141_106814_length_6026_cov_1117.8816	lytic	low quality draft	6026	No	NA	5	2	0	Low-quality	Genome-fragment	HMM-based (lower-bound)	0	viruses_nov2351	None	PHANOTATE	0
k141_1068233_length_2251_cov_1965.0000	lytic	low quality draft	2251	No	NA	5	2	0	Low-quality	Genome-fragment	AAI-based (medium-confidence)	0	viruses_nov1266	None	PHANOTATE	0
k141_106963_length_2110_cov_1093.5495	lytic	low quality draft	2110	No	NA	4	3	0	Low-quality	Genome-fragment	AAI-based (medium-confidence)	0	viruses_nov2958	None	PHANOTATE	1
k141_106965_length_3772_cov_15.0000	lytic	low quality draft	3772	No	NA	8	2	0	Low-quality	Genome-fragment	HMM-based (lower-bound)	0	viruses_nov1781	None	PHANOTATE	0
k141_107012_length_3663_cov_465.7504	lytic	low quality draft	3663	No	NA	6	2	0	Low-quality	Genome-fragment	AAI-based (medium-confidence)	0	viruses_nov1992	None	PHANOTATE	2
k141_1070552_length_6220_cov_20.0000	lytic	low quality draft	6220	No	NA	7	3	0	Low-quality	Genome-fragment	AAI-based (medium-confidence)	0	viruses_nov2426	None	PHANOTATE	1
k141_1071185_length_7242_cov_176.4651	lytic	low quality draft	7242	No	NA	10	2	0	Low-quality	Genome-fragment	HMM-based (lower-bound)	0	viruses_nov2593	None	PHANOTATE	1
k141_107145_length_13050_cov_23.0000	lytic	low quality draft	13050	No	NA	15	3	0	Low-quality	Genome-fragment	HMM-based (lower-bound)	0	viruses_nov2281	None	PHANOTATE	2
k141_1071606_length_28106_cov_671.2083	lytic	medium quality draft	28106	No	NA	49	9	2	Low-quality	Genome-fragment	AAI-based (medium-confidence)	0	viruses_nov1315	None	PHANOTATE	2
k141_1072013_length_2080_cov_213.0000	lytic	low quality draft	2080	No	NA	4	1	0	Low-quality	Genome-fragment	AAI-based (high-confidence)	0	viruses_nov2600	None	PHANOTATE	0
k141_107217_length_1876_cov_25.0000	lytic	low quality draft	1876	No	NA	5	4	0	Low-quality	Genome-fragment	HMM-based (lower-bound)	0	viruses_nov2371	None	PHANOTATE	4
k141_1073491_length_6428_cov_47.0000	lytic	low quality draft	6428	No	NA	7	3	0	Low-quality	Genome-fragment	AAI-based (medium-confidence)	0	viruses_nov1001	None	PHANOTATE	0
k141_1073550_length_1000_cov_295.0000	lytic	low quality draft	1000	No	NA	5	1	0	Low-quality	Genome-fragment	AAI-based (medium-confidence)	0	viruses_nov1068	None	PHANOTATE	0
k141_107404_length_14767_cov_35.9201	lysogenic	medium quality draft	14767	No	NA	21	5	1	Low-quality	Genome-fragment	HMM-based (lower-bound)	0	viruses_nov1805	None	PHANOTATE	3
k141_1074168_length_5464_cov_397.0000	lytic	low quality draft	5464	No	NA	12	5	0	Low-quality	Genome-fragment	AAI-based (medium-confidence)	0	viruses_nov377	None	PHANOTATE	3
k141_1074990_length_4697_cov_127.0000	lytic	low quality draft	4697	No	NA	8	1	0	Low-quality	Genome-fragment	HMM-based (lower-bound)	0	viruses_nov3033	None	PHANOTATE	0
k141_1075002_length_3244_cov_1175.0000	lytic	low quality draft	3244	No	NA	9	1	0	Low-quality	Genome-fragment	AAI-based (medium-confidence)	0	viruses_nov428	None	PHANOTATE	0
k141_1075480_length_2290_cov_29.0000	lytic	low quality draft	2290	No	NA	4	2	0	Low-quality	Genome-fragment	HMM-based (lower-bound)	0	viruses_nov3005	None	PHANOTATE	3
k141_107666_length_6020_cov_120.0000	lytic	low quality draft	6020	No	NA	9	1	1	Low-quality	Genome-fragment	AAI-based (medium-confidence)	0	viruses_nov2961	None	PHANOTATE	0
k141_1077135_length_3010_cov_78.0000	lytic	low quality draft	3010	No	NA	4	4	0	Low-quality	Genome-fragment	AAI-based (high-confidence)	0	viruses_nov2512	None	PHANOTATE	2
k141_1078586_length_1969_cov_374.0000	lytic	low quality draft	1969	No	NA	5	2	0	Low-quality	Genome-fragment	AAI-based (medium-confidence)	0	viruses_nov1052	None	PHANOTATE	0
k141_1078683_length_2345_cov_69.0000	lytic	low quality draft	2345	No	NA	4	1	0	Low-quality	Genome-fragment	AAI-based (medium-confidence)	0	viruses_nov795	None	PHANOTATE	0
k141_1078897_length_3438_cov_30.0000	lytic	low quality draft	3438	No	NA	5	1	0	Low-quality	Genome-fragment	HMM-based (lower-bound)	0	viruses_nov429	None	PHANOTATE	0
k141_1078915_length_3625_cov_21.0000	lytic	low quality draft	3625	No	NA	6	1	0	Low-quality	Genome-fragment	AAI-based (medium-confidence)	0	viruses_nov1540	None	PHANOTATE	1
k141_1079231_length_2333_cov_577.0000	lytic	low quality draft	2333	No	NA	8	0	0	Not-determined	Genome-fragment	NA	0	viruses_nov297	None	Prodigal	0
k141_1079821_length_4899_cov_778.0000	lytic	low quality draft	4899	No	NA	12	2	0	Low-quality	Genome-fragment	AAI-based (medium-confidence)	0	viruses_nov405	None	PHANOTATE	1
k141_1079865_length_6849_cov_427.1883	lytic	low quality draft	6849	No	NA	8	2	0	Low-quality	Genome-fragment	HMM-based (lower-bound)	0	viruses_nov2774	None	PHANOTATE	0
k141_1080021_length_4452_cov_516.0000	lytic	low quality draft	4452	No	NA	12	2	0	Low-quality	Genome-fragment	HMM-based (lower-bound)	0	viruses_nov2898	None	PHANOTATE	0
k141_108055_length_27888_cov_31.0000	lytic	medium quality draft	27888	No	NA	27	9	0	Medium-quality	Genome-fragment	AAI-based (medium-confidence)	0	viruses_nov2015	None	PHANOTATE	3
k141_1080916_length_2890_cov_633.0000	lytic	low quality draft	2890	No	NA	5	2	0	Low-quality	Genome-fragment	AAI-based (medium-confidence)	0	viruses_nov55	None	PHANOTATE	1
k141_1081179_length_5184_cov_216.0000	lytic	low quality draft	5184	No	NA	6	3	0	Low-quality	Genome-fragment	AAI-based (medium-confidence)	0	viruses_nov652	None	PHANOTATE	3
k141_1081441_length_1714_cov_33.0000	lytic	low quality draft	1714	No	NA	4	0	0	Low-quality	Genome-fragment	AAI-based (medium-confidence)	0	viruses_nov2611	None	PHANOTATE	0
k141_1081569_length_15069_cov_48.0000	lytic	low quality draft	15069	No	NA	24	6	0	Low-quality	Genome-fragment	AAI-based (medium-confidence)	0	viruses_nov5	None	PHANOTATE	0
k141_108190_length_2616_cov_642.9515	lytic	low quality draft	2616	No	NA	7	1	0	Low-quality	Genome-fragment	HMM-based (lower-bound)	0	viruses_nov1427	None	PHANOTATE	0
k141_1082006_length_2020_cov_9.0000	lytic	low quality draft	2020	No	NA	4	4	0	Low-quality	Genome-fragment	AAI-based (high-confidence)	0	viruses_nov2448	None	PHANOTATE	2
k141_1082269_length_38466_cov_85.0022	lysogenic	complete circular	38466	No	NA	51	27	0	Complete	High-quality	DTR (high-confidence)	0	viruses_nov231	DTR	PHANOTATE	15
k141_1083198_length_1772_cov_31.0000	lytic	low quality draft	1772	No	NA	5	1	0	Low-quality	Genome-fragment	AAI-based (high-confidence)	0	viruses_nov2742	None	PHANOTATE	0
k141_1083236_length_29068_cov_434.0150	lytic	complete circular	29068	No	NA	34	12	0	Low-quality	Genome-fragment	HMM-based (lower-bound)	0	viruses_nov152	DTR	PHANOTATE	5
k141_1083241_length_4762_cov_75.2644	lytic	low quality draft	4762	No	NA	12	3	0	Low-quality	Genome-fragment	HMM-based (lower-bound)	0	viruses_nov2510	None	PHANOTATE	0
k141_1084059_length_6019_cov_292.0817	lytic	low quality draft	6019	No	NA	6	3	0	Low-quality	Genome-fragment	HMM-based (lower-bound)	0	viruses_nov497	None	PHANOTATE	2
k141_1084300_length_61810_cov_75.0012	lytic	complete circular	61810	No	NA	98	37	0	Complete	High-quality	DTR (high-confidence)	0	viruses_nov945	DTR	PHANOTATE	7
k141_1085195_length_1771_cov_808.0000	lytic	low quality draft	1771	No	NA	4	1	0	Low-quality	Genome-fragment	HMM-based (lower-bound)	0	viruses_nov99	None	PHANOTATE	0
k141_1085759_length_3767_cov_16.0000	lytic	low quality draft	3767	No	NA	5	5	0	Low-quality	Genome-fragment	AAI-based (high-confidence)	0	viruses_nov2931	None	PHANOTATE	2
k141_1087916_length_1004_cov_7.0000	lytic	low quality draft	1004	No	NA	4	0	0	Low-quality	Genome-fragment	AAI-based (high-confidence)	0	viruses_nov2660	None	PHANOTATE	0
k141_1088277_length_2634_cov_16.0000	lytic	low quality draft	2634	No	NA	4	0	0	Not-determined	Genome-fragment	NA	0	viruses_nov2674	None	PHANOTATE	0
k141_1089659_length_3988_cov_1130.1851	lytic	low quality draft	3988	No	NA	4	2	0	Low-quality	Genome-fragment	AAI-based (medium-confidence)	0	viruses_nov587	None	PHANOTATE	1
k141_1089831_length_3742_cov_1301.0000	lytic	low quality draft	3742	No	NA	6	1	0	Low-quality	Genome-fragment	HMM-based (lower-bound)	0	viruses_nov36	None	PHANOTATE	0
k141_1089914_length_5992_cov_64.4890	lytic	low quality draft	5992	No	NA	9	4	1	Low-quality	Genome-fragment	HMM-based (lower-bound)	0	viruses_nov2317	None	PHANOTATE	1
k141_1090129_length_3235_cov_53.0000	lytic	low quality draft	3235	No	NA	4	1	0	Low-quality	Genome-fragment	AAI-based (medium-confidence)	0	viruses_nov672	None	PHANOTATE	1
k141_1090671_length_5379_cov_588.0000	lytic	low quality draft	5379	No	NA	6	3	0	Low-quality	Genome-fragment	AAI-based (medium-confidence)	0	viruses_nov2556	None	PHANOTATE	0
k141_1090815_length_4004_cov_497.0000	lytic	low quality draft	4004	No	NA	4	2	0	Low-quality	Genome-fragment	AAI-based (high-confidence)	0	viruses_nov2838	None	PHANOTATE	2
k141_1090837_length_3285_cov_1662.0000	lytic	low quality draft	3285	No	NA	7	3	0	Low-quality	Genome-fragment	AAI-based (medium-confidence)	0	viruses_nov457	None	PHANOTATE	0
k141_1090869_length_34805_cov_211.0061	lysogenic	complete circular	34805	No	NA	51	20	0	Complete	High-quality	DTR (medium-confidence)	0	viruses_nov1475	DTR	PHANOTATE	13
k141_1091141_length_1786_cov_105.0000	lytic	low quality draft	1786	No	NA	5	1	0	Low-quality	Genome-fragment	HMM-based (lower-bound)	0	viruses_nov402	None	PHANOTATE	0
k141_1091197_length_1957_cov_16.0000	lytic	low quality draft	1957	No	NA	5	2	0	Low-quality	Genome-fragment	AAI-based (high-confidence)	0	viruses_nov2745	None	PHANOTATE	0
k141_1091562_length_1535_cov_1668.0000	lytic	low quality draft	1535	No	NA	4	1	0	Low-quality	Genome-fragment	AAI-based (medium-confidence)	0	viruses_nov711	None	PHANOTATE	1
k141_1092009_length_43677_cov_449.0103	lytic	complete circular	43677	No	NA	86	41	0	Complete	High-quality	DTR (high-confidence)	0	viruses_nov762	DTR	PHANOTATE	14
k141_1093321_length_17961_cov_75.0000	lytic	low quality draft	17961	No	NA	14	9	0	Medium-quality	Genome-fragment	AAI-based (high-confidence)	0	viruses_nov2373	None	PHANOTATE	3
k141_1093550_length_4183_cov_26.0064	lytic	complete circular	4183	No	NA	6	1	0	Complete	High-quality	DTR (high-confidence)	0	viruses_nov1254	DTR	Prodigal	0
k141_1093926_length_13524_cov_28.0000	lytic	low quality draft	13524	No	NA	20	8	0	Low-quality	Genome-fragment	HMM-based (lower-bound)	0	viruses_nov760	None	PHANOTATE	5
k141_1094290_length_1281_cov_2231.0000	lytic	low quality draft	1281	No	NA	5	0	0	Low-quality	Genome-fragment	AAI-based (medium-confidence)	0	viruses_nov312	None	PHANOTATE	0
k141_1094503_length_1537_cov_457.0000	lytic	low quality draft	1537	No	NA	5	1	0	Low-quality	Genome-fragment	AAI-based (medium-confidence)	0	viruses_nov2598	None	PHANOTATE	0
k141_1096273_length_5537_cov_697.0000	lytic	low quality draft	5537	No	NA	12	2	0	Low-quality	Genome-fragment	HMM-based (lower-bound)	0	viruses_nov961	ITR	PHANOTATE	0
k141_1097396_length_5207_cov_107.0000	lytic	low quality draft	5207	No	NA	11	2	0	Low-quality	Genome-fragment	HMM-based (lower-bound)	0	viruses_nov2525	None	PHANOTATE	0
k141_1098059_length_2125_cov_18.0000	lytic	low quality draft	2125	No	NA	4	1	0	Low-quality	Genome-fragment	HMM-based (lower-bound)	0	viruses_nov758	None	PHANOTATE	0
k141_1098527_length_1231_cov_94.0000	lytic	low quality draft	1231	No	NA	4	3	0	Low-quality	Genome-fragment	AAI-based (high-confidence)	0	viruses_nov2256	None	PHANOTATE	1
k141_1099042_length_4475_cov_344.6996	lytic	low quality draft	4475	No	NA	7	3	0	Low-quality	Genome-fragment	AAI-based (medium-confidence)	0	viruses_nov2307	None	PHANOTATE	2
k141_1099085_length_3996_cov_65.0000	lytic	low quality draft	3996	No	NA	4	2	0	Low-quality	Genome-fragment	HMM-based (lower-bound)	0	viruses_nov2607	None	PHANOTATE	0
k141_1099193_length_5714_cov_309.0000	lytic	low quality draft	5714	No	NA	10	2	0	Low-quality	Genome-fragment	HMM-based (lower-bound)	0	viruses_nov1084	None	PHANOTATE	0
k141_1099576_length_3689_cov_104.0000	lytic	low quality draft	3689	No	NA	5	1	0	Low-quality	Genome-fragment	HMM-based (lower-bound)	0	viruses_nov2811	None	PHANOTATE	0
k141_1099799_length_2971_cov_313.0000	lytic	low quality draft	2971	No	NA	4	3	0	Low-quality	Genome-fragment	AAI-based (high-confidence)	0	viruses_nov2255	None	PHANOTATE	0
k141_1100038_length_38105_cov_285.0381	lytic	medium quality draft	38105	No	NA	48	14	0	Low-quality	Genome-fragment	AAI-based (high-confidence)	0	viruses_nov787	None	PHANOTATE	3
k141_1100553_length_6140_cov_99.9842	lytic	low quality draft	6140	No	NA	13	3	0	Low-quality	Genome-fragment	HMM-based (lower-bound)	0	viruses_nov2702	None	PHANOTATE	0
k141_1100910_length_3342_cov_745.1590	lytic	low quality draft	3342	No	NA	6	1	0	Low-quality	Genome-fragment	HMM-based (lower-bound)	0	viruses_nov526	None	PHANOTATE	0
k141_1101756_length_2392_cov_111.0000	lytic	low quality draft	2392	No	NA	5	2	0	Low-quality	Genome-fragment	AAI-based (medium-confidence)	0	viruses_nov803	None	PHANOTATE	0
k141_1101865_length_2306_cov_419.0000	lytic	low quality draft	2306	No	NA	4	1	0	Low-quality	Genome-fragment	HMM-based (lower-bound)	0	viruses_nov2893	None	PHANOTATE	0
k141_1102609_length_5914_cov_527.0000	lytic	low quality draft	5914	No	NA	11	10	0	Low-quality	Genome-fragment	AAI-based (medium-confidence)	0	viruses_nov2934	None	PHANOTATE	6
k141_1102874_length_2417_cov_871.0000	lytic	low quality draft	2417	No	NA	5	3	0	Low-quality	Genome-fragment	HMM-based (lower-bound)	0	viruses_nov2641	None	PHANOTATE	0
k141_1102900_length_5169_cov_25.0000	lytic	low quality draft	5169	No	NA	11	2	0	Low-quality	Genome-fragment	HMM-based (lower-bound)	0	viruses_nov1191	None	PHANOTATE	0
k141_1104374_length_2256_cov_22.0000	lytic	low quality draft	2256	No	NA	5	5	0	Low-quality	Genome-fragment	AAI-based (medium-confidence)	0	viruses_nov1059	None	PHANOTATE	3
k141_1107527_length_3919_cov_32.9518	lytic	low quality draft	3919	No	NA	7	0	0	Low-quality	Genome-fragment	AAI-based (medium-confidence)	0	viruses_nov263	None	PHANOTATE	0
k141_1107952_length_2263_cov_470.0000	lytic	low quality draft	2263	No	NA	4	2	0	Low-quality	Genome-fragment	HMM-based (lower-bound)	0	viruses_nov875	None	PHANOTATE	0
k141_110800_length_20850_cov_22.8973	lytic	low quality draft	20850	No	NA	25	18	0	Medium-quality	Genome-fragment	AAI-based (medium-confidence)	0	viruses_nov1767	None	PHANOTATE	12
k141_1108033_length_1349_cov_263.0000	lytic	low quality draft	1349	No	NA	3	0	0	Low-quality	Genome-fragment	AAI-based (medium-confidence)	0	viruses_nov1327	None	PHANOTATE	0
k141_1108088_length_3914_cov_395.0000	lytic	low quality draft	3914	No	NA	8	2	0	Low-quality	Genome-fragment	AAI-based (high-confidence)	0	viruses_nov680	None	PHANOTATE	0
k141_1108187_length_17878_cov_85.2362	lytic	medium quality draft	17878	No	NA	30	9	1	Low-quality	Genome-fragment	AAI-based (medium-confidence)	0	viruses_nov1530	None	PHANOTATE	1
k141_110914_length_3396_cov_14.6249	lytic	low quality draft	3396	No	NA	6	4	0	Low-quality	Genome-fragment	AAI-based (medium-confidence)	0	viruses_nov1722	None	PHANOTATE	2
k141_110920_length_1557_cov_52.0000	lytic	low quality draft	1557	No	NA	4	2	0	Low-quality	Genome-fragment	AAI-based (medium-confidence)	0	viruses_nov1207	None	PHANOTATE	0
k141_1109442_length_5619_cov_1027.9901	lytic	low quality draft	5619	No	NA	13	1	1	Low-quality	Genome-fragment	HMM-based (lower-bound)	0	viruses_nov801	None	PHANOTATE	0
k141_1110468_length_14678_cov_198.7778	lytic	low quality draft	14678	No	NA	22	3	0	Low-quality	Genome-fragment	HMM-based (lower-bound)	0	viruses_nov2511	None	PHANOTATE	0
k141_1110515_length_8631_cov_162.0000	lytic	low quality draft	8631	No	NA	14	3	0	Low-quality	Genome-fragment	AAI-based (high-confidence)	0	viruses_nov2809	None	PHANOTATE	3
k141_1111288_length_2391_cov_344.0000	lytic	low quality draft	2391	No	NA	9	1	0	Low-quality	Genome-fragment	HMM-based (lower-bound)	0	viruses_nov1025	None	PHANOTATE	0
k141_1111439_length_1896_cov_21.0000	lytic	low quality draft	1896	No	NA	4	2	0	Low-quality	Genome-fragment	AAI-based (high-confidence)	0	viruses_nov982	None	PHANOTATE	1
k141_1112473_length_39599_cov_74.0000	lytic	low quality draft	39599	No	NA	36	15	0	Low-quality	Genome-fragment	AAI-based (high-confidence)	0	viruses_nov639	None	PHANOTATE	5
k141_111285_length_8765_cov_186.8961	lytic	low quality draft	8765	No	NA	11	6	0	Low-quality	Genome-fragment	HMM-based (lower-bound)	0	viruses_nov914	None	PHANOTATE	2
k141_111364_length_14689_cov_20.2044	lysogenic	low quality draft	14689	No	NA	31	4	0	Low-quality	Genome-fragment	HMM-based (lower-bound)	0	viruses_nov1752	None	PHANOTATE	0
k141_111497_length_17981_cov_41.7236	lytic	low quality draft	17981	No	NA	20	14	0	Low-quality	Genome-fragment	AAI-based (high-confidence)	0	viruses_nov1597	None	PHANOTATE	9
k141_1115032_length_3604_cov_269.0000	lytic	low quality draft	3604	No	NA	8	3	0	Low-quality	Genome-fragment	HMM-based (lower-bound)	0	viruses_nov2273	None	PHANOTATE	1
k141_1115116_length_5861_cov_22.0000	lytic	low quality draft	5861	No	NA	4	2	0	Low-quality	Genome-fragment	HMM-based (lower-bound)	0	viruses_nov2723	None	PHANOTATE	0
k141_1115499_length_24500_cov_316.1372	lytic	low quality draft	24500	No	NA	18	16	0	Low-quality	Genome-fragment	AAI-based (medium-confidence)	0	viruses_nov1378	ITR	PHANOTATE	4
k141_1116569_length_25682_cov_804.0713	lytic	low quality draft	25682	No	NA	31	5	2	Low-quality	Genome-fragment	AAI-based (medium-confidence)	0	viruses_nov1010	None	PHANOTATE	1
k141_1116680_length_2633_cov_1191.0000	lytic	low quality draft	2633	No	NA	5	2	0	Low-quality	Genome-fragment	AAI-based (medium-confidence)	0	viruses_nov1349	None	PHANOTATE	1
k141_1116804_length_2421_cov_252.0000	lytic	low quality draft	2421	No	NA	7	3	0	Low-quality	Genome-fragment	AAI-based (medium-confidence)	0	viruses_nov2905	None	PHANOTATE	0
k141_111722_length_4082_cov_56.0000	lytic	low quality draft	4082	No	NA	9	4	0	Low-quality	Genome-fragment	AAI-based (medium-confidence)	0	viruses_nov2096	None	PHANOTATE	4
k141_1117903_length_4820_cov_462.0000	lytic	low quality draft	4820	No	NA	9	0	0	Not-determined	Genome-fragment	NA	0	viruses_nov2681	None	PHANOTATE	0
k141_11180_length_3083_cov_13.0000	lytic	low quality draft	3083	No	NA	5	1	0	Low-quality	Genome-fragment	HMM-based (lower-bound)	0	viruses_nov336	None	PHANOTATE	0
k141_1118876_length_19210_cov_202.5258	lytic	high quality draft	19210	No	NA	25	9	0	Low-quality	Genome-fragment	AAI-based (medium-confidence)	0	viruses_nov846	None	PHANOTATE	6
k141_1119039_length_7792_cov_833.0596	lytic	low quality draft	7792	No	NA	11	6	0	Low-quality	Genome-fragment	AAI-based (medium-confidence)	0	viruses_nov552	None	PHANOTATE	0
k141_1119205_length_2410_cov_416.0000	lytic	low quality draft	2410	No	NA	6	1	0	Low-quality	Genome-fragment	AAI-based (medium-confidence)	0	viruses_nov1401	None	PHANOTATE	0
k141_1119382_length_1987_cov_91.0000	lytic	low quality draft	1987	No	NA	6	1	0	Low-quality	Genome-fragment	AAI-based (medium-confidence)	0	viruses_nov2322	None	PHANOTATE	0
k141_1119724_length_2962_cov_747.0000	lytic	low quality draft	2962	No	NA	5	2	0	Low-quality	Genome-fragment	HMM-based (lower-bound)	0	viruses_nov929	None	PHANOTATE	1
k141_1120097_length_1894_cov_838.0000	lytic	low quality draft	1894	No	NA	5	2	0	Low-quality	Genome-fragment	AAI-based (medium-confidence)	0	viruses_nov107	None	PHANOTATE	1
k141_1120211_length_15622_cov_41.0000	lytic	medium quality draft	15622	No	NA	19	10	0	Low-quality	Genome-fragment	AAI-based (medium-confidence)	0	viruses_nov2429	None	PHANOTATE	5
k141_1120266_length_3379_cov_395.0000	lytic	low quality draft	3379	No	NA	8	0	1	Not-determined	Genome-fragment	NA	0	viruses_nov2402	None	PHANOTATE	0
k141_1120975_length_1485_cov_970.1875	lytic	low quality draft	1485	No	NA	4	1	0	Low-quality	Genome-fragment	AAI-based (medium-confidence)	0	viruses_nov1159	None	PHANOTATE	0
k141_1122335_length_1496_cov_105.0000	lytic	low quality draft	1496	No	NA	4	1	0	Low-quality	Genome-fragment	AAI-based (medium-confidence)	0	viruses_nov69	None	PHANOTATE	1
k141_112400_length_3180_cov_56.0000	lytic	low quality draft	3180	No	NA	7	1	0	Low-quality	Genome-fragment	HMM-based (lower-bound)	0	viruses_nov531	None	PHANOTATE	0
k141_1124930_length_106854_cov_102.1879	lytic	high quality draft	106854	No	NA	83	29	0	Low-quality	Genome-fragment	AAI-based (medium-confidence)	0	viruses_nov2463	None	PHANOTATE	5
k141_1126012_length_1717_cov_177.0000	lytic	low quality draft	1717	No	NA	4	1	0	Low-quality	Genome-fragment	AAI-based (high-confidence)	0	viruses_nov2457	None	PHANOTATE	0
k141_1126250_length_3682_cov_432.0000	lytic	low quality draft	3682	No	NA	9	6	0	Low-quality	Genome-fragment	AAI-based (high-confidence)	0	viruses_nov1054	None	PHANOTATE	0
k141_1126672_length_1761_cov_1071.4049	lytic	low quality draft	1761	No	NA	6	1	0	Low-quality	Genome-fragment	AAI-based (medium-confidence)	0	viruses_nov1360	None	PHANOTATE	0
k141_1127307_length_8782_cov_162.1167	lytic	low quality draft	8782	No	NA	11	3	0	Low-quality	Genome-fragment	HMM-based (lower-bound)	0	viruses_nov471	None	PHANOTATE	1
k141_112789_length_5121_cov_100.0000	lytic	low quality draft	5121	No	NA	14	2	0	Low-quality	Genome-fragment	HMM-based (lower-bound)	0	viruses_nov2897	None	PHANOTATE	0
k141_1128050_length_3343_cov_1366.0000	lytic	low quality draft	3343	No	NA	7	1	0	Low-quality	Genome-fragment	AAI-based (medium-confidence)	0	viruses_nov368	None	PHANOTATE	0
k141_1128156_length_7913_cov_201.0000	lytic	low quality draft	7913	No	NA	13	10	1	Low-quality	Genome-fragment	AAI-based (high-confidence)	0	viruses_nov2932	None	PHANOTATE	8
k141_1128255_length_2591_cov_602.7869	lytic	low quality draft	2591	No	NA	7	1	0	Low-quality	Genome-fragment	HMM-based (lower-bound)	0	viruses_nov2923	None	PHANOTATE	0
k141_1129694_length_7255_cov_256.0000	lytic	low quality draft	7255	No	NA	13	3	1	Low-quality	Genome-fragment	HMM-based (lower-bound)	0	viruses_nov975	None	PHANOTATE	1
k141_112970_length_1929_cov_9.0000	lytic	low quality draft	1929	No	NA	5	2	0	Low-quality	Genome-fragment	AAI-based (medium-confidence)	0	viruses_nov1649	None	PHANOTATE	0
k141_1130033_length_8639_cov_180.0000	lytic	low quality draft	8639	No	NA	13	9	0	Low-quality	Genome-fragment	AAI-based (medium-confidence)	0	viruses_nov2822	None	PHANOTATE	3
k141_1130943_length_2574_cov_977.1915	lytic	low quality draft	2574	No	NA	8	7	0	Low-quality	Genome-fragment	AAI-based (high-confidence)	0	viruses_nov2315	None	PHANOTATE	0
k141_1131394_length_3463_cov_492.6412	lytic	low quality draft	3463	No	NA	5	4	0	Low-quality	Genome-fragment	HMM-based (lower-bound)	0	viruses_nov1256	None	PHANOTATE	3
k141_1131538_length_14790_cov_71.0074	lytic	low quality draft	14790	No	NA	20	1	0	Low-quality	Genome-fragment	HMM-based (lower-bound)	0	viruses_nov2737	None	PHANOTATE	0
k141_113164_length_3124_cov_994.0000	lytic	low quality draft	3124	No	NA	4	1	0	Low-quality	Genome-fragment	AAI-based (medium-confidence)	0	viruses_nov1240	None	PHANOTATE	0
k141_1131826_length_2089_cov_1465.0000	lytic	low quality draft	2089	No	NA	4	3	0	Low-quality	Genome-fragment	HMM-based (lower-bound)	0	viruses_nov3036	None	PHANOTATE	1
k141_113223_length_5589_cov_732.9029	lytic	low quality draft	5589	No	NA	6	3	0	Low-quality	Genome-fragment	HMM-based (lower-bound)	0	viruses_nov334	None	PHANOTATE	2
k141_1136162_length_4299_cov_78.0000	lytic	low quality draft	4299	No	NA	9	2	0	Low-quality	Genome-fragment	AAI-based (high-confidence)	0	viruses_nov388	None	PHANOTATE	0
k141_113622_length_1893_cov_1307.0000	lytic	low quality draft	1893	No	NA	7	1	0	Low-quality	Genome-fragment	HMM-based (lower-bound)	0	viruses_nov1250	None	Prodigal	0
k141_1140064_length_5398_cov_214.8830	lytic	low quality draft	5398	No	NA	5	1	0	Low-quality	Genome-fragment	HMM-based (lower-bound)	0	viruses_nov990	None	Prodigal	0
k141_1140587_length_2386_cov_546.7563	lytic	low quality draft	2386	No	NA	4	1	0	Low-quality	Genome-fragment	HMM-based (lower-bound)	0	viruses_nov2578	None	PHANOTATE	0
k141_114084_length_5612_cov_227.7015	lytic	low quality draft	5612	No	NA	14	5	0	Low-quality	Genome-fragment	HMM-based (lower-bound)	0	viruses_nov1812	None	PHANOTATE	0
k141_114116_length_4967_cov_188.1430	lytic	low quality draft	4967	No	NA	13	2	0	Low-quality	Genome-fragment	AAI-based (medium-confidence)	0	viruses_nov2133	None	PHANOTATE	0
k141_1141197_length_2125_cov_15.0000	lytic	low quality draft	2125	No	NA	5	4	0	Low-quality	Genome-fragment	HMM-based (lower-bound)	0	viruses_nov2846	None	PHANOTATE	4
k141_1141819_length_3242_cov_171.0000	lytic	low quality draft	3242	No	NA	9	1	0	Low-quality	Genome-fragment	HMM-based (lower-bound)	0	viruses_nov725	None	PHANOTATE	0
k141_1142065_length_5139_cov_586.0490	lysogenic	low quality draft	5139	No	NA	4	1	0	Low-quality	Genome-fragment	HMM-based (lower-bound)	0	viruses_nov1253	None	PHANOTATE	0
k141_1143286_length_2548_cov_1857.0382	lytic	low quality draft	2548	No	NA	6	1	0	Low-quality	Genome-fragment	AAI-based (medium-confidence)	0	viruses_nov438	None	PHANOTATE	0
k141_1144002_length_3929_cov_152.0000	lytic	low quality draft	3929	No	NA	9	2	0	Low-quality	Genome-fragment	AAI-based (medium-confidence)	0	viruses_nov454	None	PHANOTATE	0
k141_1144967_length_4463_cov_508.0000	lytic	low quality draft	4463	No	NA	7	3	0	Low-quality	Genome-fragment	AAI-based (high-confidence)	0	viruses_nov91	None	PHANOTATE	0
k141_1145070_length_1115_cov_687.9620	lytic	low quality draft	1115	No	NA	4	1	0	Low-quality	Genome-fragment	AAI-based (medium-confidence)	0	viruses_nov2816	None	PHANOTATE	0
k141_1145087_length_3238_cov_1180.0000	lytic	low quality draft	3238	No	NA	5	1	0	Low-quality	Genome-fragment	HMM-based (lower-bound)	0	viruses_nov2239	None	PHANOTATE	1
k141_1147463_length_16745_cov_125.0000	lytic	medium quality draft	16745	No	NA	19	8	0	Complete	High-quality	ITR (high-confidence)	0	viruses_nov1557	None	PHANOTATE	5
k141_1148051_length_35939_cov_117.8140	lytic	complete circular	35939	No	NA	54	19	0	Low-quality	Genome-fragment	HMM-based (lower-bound)	0	viruses_nov2670	DTR	PHANOTATE	9
k141_1148378_length_8238_cov_285.0000	lytic	low quality draft	8238	No	NA	8	3	0	Low-quality	Genome-fragment	AAI-based (medium-confidence)	0	viruses_nov2992	None	PHANOTATE	6
k141_114883_length_14209_cov_24.8711	lytic	low quality draft	14209	No	NA	16	15	0	Low-quality	Genome-fragment	AAI-based (medium-confidence)	0	viruses_nov1690	None	PHANOTATE	10
k141_114933_length_6005_cov_112.0000	lytic	low quality draft	6005	No	NA	13	1	0	Low-quality	Genome-fragment	HMM-based (lower-bound)	0	viruses_nov585	ITR	PHANOTATE	0
k141_1149713_length_4478_cov_1359.5718	lytic	low quality draft	4478	No	NA	13	3	0	Low-quality	Genome-fragment	HMM-based (lower-bound)	0	viruses_nov2748	None	PHANOTATE	0
k141_1150657_length_1834_cov_978.0000	lytic	low quality draft	1834	No	NA	4	3	0	Low-quality	Genome-fragment	AAI-based (high-confidence)	0	viruses_nov2789	None	PHANOTATE	2
k141_115074_length_1371_cov_741.6537	lytic	low quality draft	1371	No	NA	4	3	0	Low-quality	Genome-fragment	AAI-based (high-confidence)	0	viruses_nov2732	None	PHANOTATE	0
k141_1150957_length_1854_cov_10.0000	lytic	low quality draft	1854	No	NA	4	3	0	Low-quality	Genome-fragment	HMM-based (lower-bound)	0	viruses_nov694	None	PHANOTATE	1
k141_1151501_length_8837_cov_126.1334	lytic	low quality draft	8837	No	NA	8	1	0	Low-quality	Genome-fragment	HMM-based (lower-bound)	0	viruses_nov2973	None	PHANOTATE	0
k141_115186_length_1644_cov_6.1976	lytic	low quality draft	1644	No	NA	4	2	0	Low-quality	Genome-fragment	AAI-based (medium-confidence)	0	viruses_nov1786	None	PHANOTATE	0
k141_1153045_length_4774_cov_75.0000	lytic	low quality draft	4774	No	NA	6	3	0	Low-quality	Genome-fragment	AAI-based (high-confidence)	0	viruses_nov1442	None	PHANOTATE	0
k141_1153807_length_3179_cov_21.0806	lytic	low quality draft	3179	No	NA	7	1	0	Low-quality	Genome-fragment	HMM-based (lower-bound)	0	viruses_nov2497	None	PHANOTATE	0
k141_1154940_length_1364_cov_13.0000	lytic	low quality draft	1364	No	NA	5	3	0	Low-quality	Genome-fragment	AAI-based (high-confidence)	0	viruses_nov3016	None	PHANOTATE	0
k141_1155572_length_9733_cov_1140.5834	lytic	low quality draft	9733	No	NA	7	2	0	Low-quality	Genome-fragment	HMM-based (lower-bound)	0	viruses_nov2470	None	PHANOTATE	0
k141_1156598_length_4425_cov_560.0000	lytic	low quality draft	4425	No	NA	12	3	0	Low-quality	Genome-fragment	HMM-based (lower-bound)	0	viruses_nov357	None	PHANOTATE	0
k141_1157452_length_3509_cov_188.0000	lytic	low quality draft	3509	No	NA	5	3	0	Low-quality	Genome-fragment	HMM-based (lower-bound)	0	viruses_nov2797	None	PHANOTATE	2
k141_1159515_length_4272_cov_460.5144	lytic	low quality draft	4272	No	NA	5	4	0	Low-quality	Genome-fragment	AAI-based (high-confidence)	0	viruses_nov939	None	PHANOTATE	0
k141_116272_length_7264_cov_18.7549	lytic	low quality draft	7264	No	NA	9	5	0	Low-quality	Genome-fragment	AAI-based (high-confidence)	0	viruses_nov1760	None	PHANOTATE	0
k141_116443_length_3211_cov_773.6013	lytic	low quality draft	3211	No	NA	5	2	0	Low-quality	Genome-fragment	HMM-based (lower-bound)	0	viruses_nov1409	None	PHANOTATE	1
k141_116685_length_4245_cov_429.0000	lytic	low quality draft	4245	No	NA	7	2	0	Low-quality	Genome-fragment	AAI-based (medium-confidence)	0	viruses_nov1945	None	PHANOTATE	3
k141_1168670_length_1802_cov_162.0000	lytic	low quality draft	1802	No	NA	4	2	0	Low-quality	Genome-fragment	HMM-based (lower-bound)	0	viruses_nov1451	None	PHANOTATE	2
k141_116970_length_1825_cov_16.0000	lytic	low quality draft	1825	No	NA	5	3	0	Low-quality	Genome-fragment	AAI-based (high-confidence)	0	viruses_nov2050	None	PHANOTATE	0
k141_1171087_length_3064_cov_372.0000	lytic	low quality draft	3064	No	NA	5	1	0	Low-quality	Genome-fragment	HMM-based (lower-bound)	0	viruses_nov617	None	PHANOTATE	0
k141_117299_length_6287_cov_50.0000	lytic	low quality draft	6287	No	NA	13	4	0	Low-quality	Genome-fragment	AAI-based (medium-confidence)	0	viruses_nov386	None	PHANOTATE	2
k141_1173780_length_3723_cov_425.9358	lytic	low quality draft	3723	No	NA	9	4	0	Low-quality	Genome-fragment	AAI-based (medium-confidence)	0	viruses_nov750	None	PHANOTATE	0
k141_1175208_length_4534_cov_448.0000	lytic	low quality draft	4534	No	NA	9	7	0	Low-quality	Genome-fragment	AAI-based (high-confidence)	0	viruses_nov424	None	PHANOTATE	6
k141_1175646_length_11818_cov_556.8894	lytic	low quality draft	11818	No	NA	12	7	1	Low-quality	Genome-fragment	AAI-based (medium-confidence)	0	viruses_nov992	None	PHANOTATE	1
k141_1175678_length_2336_cov_71.0000	lytic	low quality draft	2336	No	NA	3	1	0	Low-quality	Genome-fragment	AAI-based (medium-confidence)	0	viruses_nov2567	None	PHANOTATE	0
k141_1176649_length_1222_cov_1736.0000	lytic	low quality draft	1222	No	NA	4	1	0	Low-quality	Genome-fragment	HMM-based (lower-bound)	0	viruses_nov1336	None	PHANOTATE	1
k141_1177085_length_8884_cov_554.0000	lytic	complete circular	8884	No	NA	13	2	0	Low-quality	Genome-fragment	AAI-based (medium-confidence)	0	viruses_nov2240	None	PHANOTATE	0
k141_1178322_length_3056_cov_21.0000	lytic	low quality draft	3056	No	NA	9	0	0	Not-determined	Genome-fragment	NA	0	viruses_nov2261	None	PHANOTATE	0
k141_117920_length_2598_cov_1079.3081	lytic	low quality draft	2598	No	NA	8	1	0	Low-quality	Genome-fragment	HMM-based (lower-bound)	0	viruses_nov1394	None	PHANOTATE	0
k141_1181984_length_3413_cov_227.0000	lytic	low quality draft	3413	No	NA	5	1	0	Low-quality	Genome-fragment	AAI-based (high-confidence)	0	viruses_nov2925	None	PHANOTATE	0
k141_118267_length_8646_cov_15.0000	lytic	low quality draft	8646	No	NA	18	3	0	Low-quality	Genome-fragment	AAI-based (medium-confidence)	0	viruses_nov1818	None	PHANOTATE	0
k141_118345_length_2729_cov_574.6151	lytic	low quality draft	2729	No	NA	4	1	0	Low-quality	Genome-fragment	AAI-based (medium-confidence)	0	viruses_nov1938	None	PHANOTATE	0
k141_1184091_length_1660_cov_202.0000	lytic	low quality draft	1660	No	NA	6	3	0	Low-quality	Genome-fragment	AAI-based (medium-confidence)	0	viruses_nov2991	None	PHANOTATE	0
k141_1184782_length_5965_cov_1569.0000	lytic	low quality draft	5965	No	NA	7	7	0	Low-quality	Genome-fragment	HMM-based (lower-bound)	0	viruses_nov495	None	PHANOTATE	1
k141_1184911_length_3365_cov_88.0000	lytic	low quality draft	3365	No	NA	6	3	0	Low-quality	Genome-fragment	AAI-based (high-confidence)	0	viruses_nov2873	None	PHANOTATE	0
k141_1186493_length_4338_cov_77.0000	lytic	low quality draft	4338	No	NA	8	6	0	Low-quality	Genome-fragment	AAI-based (medium-confidence)	0	viruses_nov2744	None	PHANOTATE	4
k141_1186612_length_14702_cov_111.0000	lytic	low quality draft	14702	No	NA	18	9	0	Low-quality	Genome-fragment	AAI-based (medium-confidence)	0	viruses_nov983	None	PHANOTATE	3
k141_1186731_length_4180_cov_37.0000	lytic	low quality draft	4180	No	NA	5	2	0	Low-quality	Genome-fragment	AAI-based (medium-confidence)	0	viruses_nov2355	None	PHANOTATE	1
k141_118731_length_2284_cov_290.0000	lytic	low quality draft	2284	No	NA	4	0	0	Not-determined	Genome-fragment	NA	0	viruses_nov2244	None	PHANOTATE	0
k141_1188380_length_23809_cov_238.0923	lysogenic	low quality draft	23809	No	NA	34	22	0	Medium-quality	Genome-fragment	AAI-based (medium-confidence)	0	viruses_nov3021	None	PHANOTATE	14
k141_1191557_length_4083_cov_1009.0000	lytic	low quality draft	4083	No	NA	7	1	0	Low-quality	Genome-fragment	AAI-based (medium-confidence)	0	viruses_nov2354	None	PHANOTATE	0
k141_1192600_length_1751_cov_2159.3205	lytic	low quality draft	1751	No	NA	3	2	0	Low-quality	Genome-fragment	HMM-based (lower-bound)	0	viruses_nov75	None	PHANOTATE	1
k141_1193543_length_19227_cov_68.0000	lytic	medium quality draft	19227	No	NA	25	21	0	Medium-quality	Genome-fragment	AAI-based (medium-confidence)	0	viruses_nov2306	None	PHANOTATE	16
k141_119376_length_6013_cov_187.0000	lytic	low quality draft	6013	No	NA	5	2	0	Low-quality	Genome-fragment	AAI-based (medium-confidence)	0	viruses_nov1030	None	PHANOTATE	0
k141_119421_length_29435_cov_158.0000	lytic	low quality draft	29435	No	NA	31	6	0	Low-quality	Genome-fragment	AAI-based (medium-confidence)	0	viruses_nov2783	None	PHANOTATE	8
k141_119496_length_1865_cov_811.7541	lytic	low quality draft	1865	No	NA	5	2	0	Low-quality	Genome-fragment	AAI-based (medium-confidence)	0	viruses_nov441	None	PHANOTATE	0
k141_1195064_length_6118_cov_16.0000	lytic	low quality draft	6118	No	NA	4	4	0	Low-quality	Genome-fragment	AAI-based (high-confidence)	0	viruses_nov2658	None	PHANOTATE	3
k141_1196153_length_2643_cov_535.0000	lytic	low quality draft	2643	No	NA	4	2	0	Low-quality	Genome-fragment	HMM-based (lower-bound)	0	viruses_nov2263	None	PHANOTATE	0
k141_119683_length_3088_cov_669.0000	lytic	low quality draft	3088	No	NA	4	2	0	Low-quality	Genome-fragment	AAI-based (medium-confidence)	0	viruses_nov2828	None	PHANOTATE	2
k141_119701_length_5697_cov_22.0000	lytic	low quality draft	5697	No	NA	5	3	0	Low-quality	Genome-fragment	AAI-based (medium-confidence)	0	viruses_nov960	None	PHANOTATE	3
k141_1199444_length_3437_cov_818.0000	lytic	low quality draft	3437	No	NA	5	4	0	Low-quality	Genome-fragment	AAI-based (high-confidence)	0	viruses_nov1503	None	PHANOTATE	3
k141_1200387_length_5073_cov_195.0000	lytic	low quality draft	5073	No	NA	7	3	0	Low-quality	Genome-fragment	AAI-based (medium-confidence)	0	viruses_nov1296	None	PHANOTATE	2
k141_120081_length_7949_cov_15.0000	lytic	low quality draft	7949	No	NA	4	3	0	Low-quality	Genome-fragment	HMM-based (lower-bound)	0	viruses_nov1633	None	PHANOTATE	1
k141_1201011_length_5299_cov_825.0000	lytic	low quality draft	5299	No	NA	10	1	0	Low-quality	Genome-fragment	HMM-based (lower-bound)	0	viruses_nov97	None	PHANOTATE	0
k141_1203667_length_1521_cov_31.0000	lytic	low quality draft	1521	No	NA	4	1	0	Low-quality	Genome-fragment	HMM-based (lower-bound)	0	viruses_nov2518	None	PHANOTATE	2
k141_1205868_length_1493_cov_187.0000	lytic	low quality draft	1493	No	NA	4	0	0	Low-quality	Genome-fragment	AAI-based (medium-confidence)	0	viruses_nov807	None	PHANOTATE	0
k141_1208483_length_4057_cov_222.0000	lytic	low quality draft	4057	No	NA	9	4	0	Low-quality	Genome-fragment	AAI-based (high-confidence)	0	viruses_nov2605	None	PHANOTATE	0
k141_12086_length_3090_cov_57.1472	lytic	low quality draft	3090	No	NA	4	3	0	Low-quality	Genome-fragment	HMM-based (lower-bound)	0	viruses_nov1757	None	PHANOTATE	0
k141_1209147_length_1258_cov_37.0000	lytic	low quality draft	1258	No	NA	5	1	0	Low-quality	Genome-fragment	AAI-based (medium-confidence)	0	viruses_nov2547	None	PHANOTATE	0
k141_121102_length_7756_cov_14.0000	lytic	low quality draft	7756	No	NA	13	2	0	Low-quality	Genome-fragment	HMM-based (lower-bound)	0	viruses_nov1814	None	PHANOTATE	0
k141_1211265_length_26035_cov_761.1049	lytic	low quality draft	26035	No	NA	44	20	1	Medium-quality	Genome-fragment	AAI-based (medium-confidence)	0	viruses_nov145	None	PHANOTATE	8
k141_1212035_length_1106_cov_203.0000	lytic	low quality draft	1106	No	NA	4	1	0	Low-quality	Genome-fragment	AAI-based (medium-confidence)	0	viruses_nov1130	None	PHANOTATE	0
k141_12128_length_3937_cov_83.0000	lytic	low quality draft	3937	No	NA	10	3	0	Low-quality	Genome-fragment	HMM-based (lower-bound)	0	viruses_nov637	None	PHANOTATE	0
k141_1214493_length_3303_cov_155.0000	lytic	low quality draft	3303	No	NA	7	1	0	Low-quality	Genome-fragment	AAI-based (medium-confidence)	0	viruses_nov28	None	PHANOTATE	0
k141_1216056_length_14884_cov_72.0000	lytic	low quality draft	14884	No	NA	22	20	0	Low-quality	Genome-fragment	AAI-based (high-confidence)	0	viruses_nov2950	None	PHANOTATE	4
k141_121976_length_2072_cov_390.6339	lytic	low quality draft	2072	No	NA	4	3	0	Low-quality	Genome-fragment	AAI-based (high-confidence)	0	viruses_nov1944	None	PHANOTATE	0
k141_1220410_length_1412_cov_163.0000	lytic	low quality draft	1412	No	NA	4	1	0	Low-quality	Genome-fragment	HMM-based (lower-bound)	0	viruses_nov2352	None	PHANOTATE	0
k141_1220560_length_3587_cov_134.0000	lytic	low quality draft	3587	No	NA	6	3	0	Low-quality	Genome-fragment	AAI-based (high-confidence)	0	viruses_nov2247	None	PHANOTATE	3
k141_122242_length_5601_cov_1524.1148	lytic	low quality draft	5601	No	NA	11	3	0	Low-quality	Genome-fragment	HMM-based (lower-bound)	0	viruses_nov1002	None	PHANOTATE	0
k141_1222809_length_45693_cov_91.4435	lytic	medium quality draft	45693	No	NA	69	38	0	Medium-quality	Genome-fragment	AAI-based (high-confidence)	0	viruses_nov2570	None	PHANOTATE	15
k141_122547_length_6072_cov_191.6033	lytic	low quality draft	6072	No	NA	9	6	0	Low-quality	Genome-fragment	HMM-based (lower-bound)	0	viruses_nov2130	None	PHANOTATE	2
k141_1226278_length_2264_cov_346.6020	lytic	low quality draft	2264	No	NA	4	0	0	Not-determined	Genome-fragment	NA	0	viruses_nov2691	None	PHANOTATE	0
k141_1226792_length_4650_cov_52.0000	lytic	low quality draft	4650	No	NA	6	0	0	Not-determined	Genome-fragment	NA	0	viruses_nov830	None	PHANOTATE	0
k141_1227199_length_5176_cov_513.0000	lytic	low quality draft	5176	No	NA	8	5	0	Low-quality	Genome-fragment	AAI-based (medium-confidence)	0	viruses_nov440	None	PHANOTATE	2
k141_1227202_length_5222_cov_999.0000	lytic	low quality draft	5222	No	NA	5	2	0	Low-quality	Genome-fragment	AAI-based (medium-confidence)	0	viruses_nov2736	None	PHANOTATE	1
k141_122842_length_9828_cov_638.1406	lytic	low quality draft	9828	No	NA	19	3	0	Low-quality	Genome-fragment	AAI-based (medium-confidence)	0	viruses_nov1792	None	PHANOTATE	0
k141_1228929_length_1694_cov_54.0000	lytic	low quality draft	1694	No	NA	4	2	0	Low-quality	Genome-fragment	AAI-based (medium-confidence)	0	viruses_nov1517	None	PHANOTATE	0
k141_1228954_length_31279_cov_132.0000	lytic	high quality draft	31279	No	NA	46	31	0	Medium-quality	Genome-fragment	AAI-based (high-confidence)	0	viruses_nov721	None	PHANOTATE	8
k141_1228986_length_14949_cov_161.4194	lytic	low quality draft	14949	No	NA	12	2	0	Low-quality	Genome-fragment	AAI-based (medium-confidence)	0	viruses_nov836	None	PHANOTATE	0
k141_1229212_length_23252_cov_241.1035	lysogenic	low quality draft	23252	No	NA	33	3	1	Medium-quality	Genome-fragment	AAI-based (medium-confidence)	0	viruses_nov376	None	PHANOTATE	0
k141_1229524_length_3042_cov_813.9314	lytic	low quality draft	3042	No	NA	9	1	0	Low-quality	Genome-fragment	HMM-based (lower-bound)	0	viruses_nov2576	None	PHANOTATE	0
k141_1229732_length_2296_cov_78.0000	lytic	low quality draft	2296	No	NA	4	2	0	Low-quality	Genome-fragment	HMM-based (lower-bound)	0	viruses_nov791	None	PHANOTATE	1
k141_1229999_length_27303_cov_28.0000	lytic	low quality draft	27303	No	NA	18	10	0	Low-quality	Genome-fragment	AAI-based (medium-confidence)	0	viruses_nov1056	None	PHANOTATE	4
k141_1230045_length_13755_cov_1146.3410	lytic	low quality draft	13755	No	NA	20	7	1	Low-quality	Genome-fragment	HMM-based (lower-bound)	0	viruses_nov185	None	PHANOTATE	4
k141_1230567_length_4976_cov_2420.0000	lytic	low quality draft	4976	No	NA	5	2	0	Low-quality	Genome-fragment	HMM-based (lower-bound)	0	viruses_nov1493	None	Prodigal	2
k141_1231475_length_2050_cov_584.0000	lytic	low quality draft	2050	No	NA	5	4	0	Low-quality	Genome-fragment	HMM-based (lower-bound)	0	viruses_nov678	None	PHANOTATE	1
k141_1231527_length_10827_cov_1790.6182	lytic	low quality draft	10827	No	NA	17	5	0	Low-quality	Genome-fragment	AAI-based (medium-confidence)	0	viruses_nov907	None	PHANOTATE	0
k141_1231546_length_1850_cov_1088.0000	lytic	low quality draft	1850	No	NA	7	2	0	Low-quality	Genome-fragment	HMM-based (lower-bound)	0	viruses_nov2404	None	PHANOTATE	0
k141_1232248_length_2625_cov_121.0000	lytic	low quality draft	2625	No	NA	4	2	0	Low-quality	Genome-fragment	AAI-based (high-confidence)	0	viruses_nov597	None	PHANOTATE	1
k141_1232469_length_10322_cov_149.0000	lytic	low quality draft	10322	No	NA	12	5	1	Low-quality	Genome-fragment	AAI-based (medium-confidence)	0	viruses_nov1334	None	PHANOTATE	0
k141_1232505_length_1298_cov_238.0000	lytic	low quality draft	1298	No	NA	4	2	0	Low-quality	Genome-fragment	HMM-based (lower-bound)	0	viruses_nov2715	None	PHANOTATE	0
k141_1233629_length_1021_cov_651.0000	lytic	low quality draft	1021	No	NA	4	1	0	Low-quality	Genome-fragment	AAI-based (high-confidence)	0	viruses_nov1180	None	PHANOTATE	0
k141_1233770_length_32369_cov_49.0000	lytic	high quality draft	32369	No	NA	38	21	0	Medium-quality	Genome-fragment	AAI-based (medium-confidence)	0	viruses_nov2283	None	PHANOTATE	8
k141_1234364_length_3442_cov_40.0000	lytic	low quality draft	3442	No	NA	7	1	0	Low-quality	Genome-fragment	AAI-based (medium-confidence)	0	viruses_nov486	None	PHANOTATE	0
k141_1234450_length_2046_cov_1540.2693	lytic	low quality draft	2046	No	NA	5	2	0	Low-quality	Genome-fragment	AAI-based (medium-confidence)	0	viruses_nov702	None	Prodigal	0
k141_123491_length_1777_cov_900.0000	lytic	low quality draft	1777	No	NA	4	4	0	Low-quality	Genome-fragment	AAI-based (high-confidence)	0	viruses_nov2879	None	PHANOTATE	2
k141_1235994_length_3138_cov_1300.1859	lytic	low quality draft	3138	No	NA	9	1	0	Low-quality	Genome-fragment	HMM-based (lower-bound)	0	viruses_nov1258	None	PHANOTATE	0
k141_1236007_length_6133_cov_517.0265	lytic	low quality draft	6133	No	NA	11	1	1	Low-quality	Genome-fragment	HMM-based (lower-bound)	0	viruses_nov1471	None	PHANOTATE	0
k141_1236309_length_2639_cov_1205.9023	lytic	low quality draft	2639	No	NA	4	1	0	Low-quality	Genome-fragment	HMM-based (lower-bound)	0	viruses_nov397	None	PHANOTATE	0
k141_1236431_length_3290_cov_20.0000	lytic	low quality draft	3290	No	NA	8	2	0	Low-quality	Genome-fragment	HMM-based (lower-bound)	0	viruses_nov2799	None	PHANOTATE	0
k141_1236851_length_3630_cov_303.0000	lytic	low quality draft	3630	No	NA	4	3	0	Low-quality	Genome-fragment	AAI-based (high-confidence)	0	viruses_nov2456	None	PHANOTATE	3
k141_123709_length_7768_cov_268.0000	lytic	low quality draft	7768	No	NA	10	4	0	Low-quality	Genome-fragment	AAI-based (medium-confidence)	0	viruses_nov419	None	PHANOTATE	3
k141_1238196_length_4821_cov_31.0000	lytic	low quality draft	4821	No	NA	9	0	0	Not-determined	Genome-fragment	NA	0	viruses_nov1110	None	PHANOTATE	0
k141_1238557_length_3075_cov_41.0000	lytic	low quality draft	3075	No	NA	5	1	0	Low-quality	Genome-fragment	HMM-based (lower-bound)	0	viruses_nov2380	None	PHANOTATE	0
k141_1238762_length_4726_cov_697.8358	lytic	low quality draft	4726	No	NA	9	1	2	Low-quality	Genome-fragment	HMM-based (lower-bound)	0	viruses_nov987	None	PHANOTATE	0
k141_1240698_length_4231_cov_46.0000	lytic	low quality draft	4231	No	NA	4	2	0	Low-quality	Genome-fragment	AAI-based (medium-confidence)	0	viruses_nov3014	None	PHANOTATE	1
k141_124084_length_4380_cov_17.0000	lytic	low quality draft	4380	No	NA	8	6	0	Low-quality	Genome-fragment	AAI-based (high-confidence)	0	viruses_nov2777	None	PHANOTATE	1
k141_1241377_length_1353_cov_23.0000	lytic	low quality draft	1353	No	NA	4	2	0	Low-quality	Genome-fragment	AAI-based (high-confidence)	0	viruses_nov580	None	PHANOTATE	0
k141_1241377_length_2933_cov_441.0000	lytic	low quality draft	2933	No	NA	8	3	0	Low-quality	Genome-fragment	AAI-based (medium-confidence)	0	viruses_nov2334	None	PHANOTATE	0
k141_1241686_length_3054_cov_413.0000	lytic	low quality draft	3054	No	NA	5	1	0	Low-quality	Genome-fragment	HMM-based (lower-bound)	0	viruses_nov3026	None	PHANOTATE	0
k141_1241913_length_9277_cov_299.0000	lytic	low quality draft	9277	No	NA	9	8	0	Low-quality	Genome-fragment	AAI-based (medium-confidence)	0	viruses_nov2778	None	PHANOTATE	5
k141_1243027_length_5488_cov_45.0000	lytic	low quality draft	5488	No	NA	11	1	0	Low-quality	Genome-fragment	HMM-based (lower-bound)	0	viruses_nov2980	None	PHANOTATE	0
k141_1243229_length_5055_cov_85.0000	lytic	medium quality draft	5055	No	NA	16	8	0	Low-quality	Genome-fragment	AAI-based (high-confidence)	0	viruses_nov2353	None	PHANOTATE	0
k141_1243321_length_1058_cov_171.0000	lytic	low quality draft	1058	No	NA	4	4	0	Low-quality	Genome-fragment	AAI-based (high-confidence)	0	viruses_nov2877	None	PHANOTATE	0
k141_1243995_length_4972_cov_475.6239	lytic	low quality draft	4972	No	NA	7	5	0	Low-quality	Genome-fragment	AAI-based (high-confidence)	0	viruses_nov569	None	PHANOTATE	5
k141_1244813_length_7319_cov_160.0000	lytic	low quality draft	7319	No	NA	15	5	0	Low-quality	Genome-fragment	AAI-based (high-confidence)	0	viruses_nov311	None	PHANOTATE	0
k141_1245183_length_13510_cov_21.1139	lytic	low quality draft	13510	No	NA	13	3	0	Low-quality	Genome-fragment	HMM-based (lower-bound)	0	viruses_nov2362	None	Prodigal	2
k141_1245303_length_3633_cov_9.0000	lytic	low quality draft	3633	No	NA	5	4	0	Low-quality	Genome-fragment	AAI-based (high-confidence)	0	viruses_nov1009	None	PHANOTATE	3
k141_1245433_length_3060_cov_147.0000	lytic	low quality draft	3060	No	NA	4	1	0	Low-quality	Genome-fragment	AAI-based (medium-confidence)	0	viruses_nov2632	None	PHANOTATE	1
k141_1245521_length_3319_cov_16.0000	lytic	low quality draft	3319	No	NA	7	2	0	Low-quality	Genome-fragment	HMM-based (lower-bound)	0	viruses_nov362	None	PHANOTATE	0
k141_1246469_length_3637_cov_360.0000	lytic	low quality draft	3637	No	NA	8	3	0	Low-quality	Genome-fragment	HMM-based (lower-bound)	0	viruses_nov1466	None	PHANOTATE	1
k141_1247847_length_1044_cov_47.0000	lytic	low quality draft	1044	No	NA	3	2	0	Low-quality	Genome-fragment	AAI-based (high-confidence)	0	viruses_nov1013	None	PHANOTATE	1
k141_1248030_length_4474_cov_40.0000	lytic	low quality draft	4474	No	NA	5	2	0	Low-quality	Genome-fragment	HMM-based (lower-bound)	0	viruses_nov2469	None	PHANOTATE	0
k141_1248328_length_3118_cov_806.0000	lytic	low quality draft	3118	No	NA	6	1	0	Low-quality	Genome-fragment	HMM-based (lower-bound)	0	viruses_nov980	None	Prodigal	0
k141_1249305_length_5122_cov_210.4935	lytic	low quality draft	5122	No	NA	9	6	0	Low-quality	Genome-fragment	AAI-based (high-confidence)	0	viruses_nov783	None	PHANOTATE	3
k141_1250050_length_2179_cov_216.0000	lytic	low quality draft	2179	No	NA	9	2	0	Low-quality	Genome-fragment	HMM-based (lower-bound)	0	viruses_nov2738	None	Prodigal	0
k141_1250642_length_25091_cov_33.0000	lytic	low quality draft	25091	No	NA	33	13	1	Low-quality	Genome-fragment	AAI-based (medium-confidence)	0	viruses_nov1340	None	PHANOTATE	0
k141_1250722_length_2352_cov_9.0000	lytic	low quality draft	2352	No	NA	4	2	0	Low-quality	Genome-fragment	HMM-based (lower-bound)	0	viruses_nov2957	None	PHANOTATE	0
k141_1251110_length_16647_cov_49.3291	lytic	medium quality draft	16647	No	NA	19	12	0	Low-quality	Genome-fragment	AAI-based (medium-confidence)	0	viruses_nov433	None	PHANOTATE	1
k141_1251243_length_4766_cov_179.0000	lytic	low quality draft	4766	No	NA	4	1	0	Low-quality	Genome-fragment	AAI-based (medium-confidence)	0	viruses_nov2727	None	Prodigal	1
k141_125206_length_1232_cov_6.0000	lytic	low quality draft	1232	No	NA	4	3	0	Low-quality	Genome-fragment	AAI-based (medium-confidence)	0	viruses_nov2642	None	PHANOTATE	2
k141_1252159_length_3277_cov_647.0000	lytic	low quality draft	3277	No	NA	4	2	0	Low-quality	Genome-fragment	HMM-based (lower-bound)	0	viruses_nov1247	None	Prodigal	1
k141_1252502_length_4322_cov_214.0000	lytic	low quality draft	4322	No	NA	4	2	0	Low-quality	Genome-fragment	AAI-based (high-confidence)	0	viruses_nov165	None	PHANOTATE	2
k141_1252693_length_6660_cov_50.0000	lytic	low quality draft	6660	No	NA	7	6	0	Low-quality	Genome-fragment	AAI-based (high-confidence)	0	viruses_nov1435	None	PHANOTATE	5
k141_1253690_length_2099_cov_38.0000	lytic	low quality draft	2099	No	NA	5	2	0	Low-quality	Genome-fragment	AAI-based (high-confidence)	0	viruses_nov731	None	PHANOTATE	0
k141_1255006_length_5575_cov_18.0000	lytic	low quality draft	5575	No	NA	6	6	0	Low-quality	Genome-fragment	AAI-based (high-confidence)	0	viruses_nov735	None	PHANOTATE	5
k141_1255469_length_12938_cov_92.0000	lytic	low quality draft	12938	No	NA	16	1	0	Low-quality	Genome-fragment	HMM-based (lower-bound)	0	viruses_nov95	None	PHANOTATE	0
k141_1255895_length_6203_cov_457.9279	lytic	low quality draft	6203	No	NA	6	3	0	Low-quality	Genome-fragment	AAI-based (medium-confidence)	0	viruses_nov322	None	PHANOTATE	0
k141_1256448_length_5915_cov_24.0000	lytic	low quality draft	5915	No	NA	5	3	0	Low-quality	Genome-fragment	AAI-based (medium-confidence)	0	viruses_nov1563	None	PHANOTATE	3
k141_1256836_length_54193_cov_500.5787	lysogenic	high quality draft	54193	No	NA	85	24	0	High-quality	High-quality	AAI-based (medium-confidence)	0	viruses_nov2301	DTR	PHANOTATE	7
k141_1256876_length_20211_cov_212.0434	lytic	low quality draft	20211	No	NA	27	22	0	Low-quality	Genome-fragment	AAI-based (medium-confidence)	0	viruses_nov2529	None	PHANOTATE	13
k141_1257071_length_4714_cov_274.0000	lytic	low quality draft	4714	No	NA	8	1	0	Low-quality	Genome-fragment	AAI-based (medium-confidence)	0	viruses_nov2639	None	PHANOTATE	0
k141_1257295_length_1374_cov_12.0000	lytic	low quality draft	1374	No	NA	5	1	0	Low-quality	Genome-fragment	AAI-based (medium-confidence)	0	viruses_nov61	None	PHANOTATE	0
k141_1258146_length_6994_cov_221.0000	lytic	low quality draft	6994	No	NA	10	7	0	Low-quality	Genome-fragment	AAI-based (high-confidence)	0	viruses_nov2615	None	PHANOTATE	2
k141_1258848_length_4894_cov_1158.3215	lytic	low quality draft	4894	No	NA	13	4	0	Low-quality	Genome-fragment	AAI-based (medium-confidence)	0	viruses_nov642	None	PHANOTATE	0
k141_1258850_length_1686_cov_143.0000	lytic	low quality draft	1686	No	NA	6	1	0	Low-quality	Genome-fragment	HMM-based (lower-bound)	0	viruses_nov1497	None	PHANOTATE	0
k141_1259228_length_3318_cov_752.4193	lytic	low quality draft	3318	No	NA	5	5	0	Low-quality	Genome-fragment	HMM-based (lower-bound)	0	viruses_nov1166	None	PHANOTATE	0
k141_1259674_length_2408_cov_6.0000	lytic	low quality draft	2408	No	NA	5	2	0	Low-quality	Genome-fragment	AAI-based (medium-confidence)	0	viruses_nov2906	None	PHANOTATE	0
k141_126060_length_11400_cov_412.7581	lytic	low quality draft	11400	No	NA	9	4	0	Low-quality	Genome-fragment	AAI-based (high-confidence)	0	viruses_nov383	None	PHANOTATE	2
k141_1261470_length_2268_cov_62.0000	lytic	low quality draft	2268	No	NA	6	1	0	Low-quality	Genome-fragment	AAI-based (medium-confidence)	0	viruses_nov850	None	PHANOTATE	0
k141_1261570_length_5859_cov_16.0000	lysogenic	low quality draft	5859	No	NA	6	4	0	Low-quality	Genome-fragment	AAI-based (medium-confidence)	0	viruses_nov2968	None	PHANOTATE	3
k141_1262005_length_2979_cov_267.0000	lytic	low quality draft	2979	No	NA	6	5	0	Low-quality	Genome-fragment	AAI-based (high-confidence)	0	viruses_nov2544	None	PHANOTATE	0
k141_126204_length_4256_cov_15.0000	lytic	low quality draft	4256	No	NA	6	1	0	Low-quality	Genome-fragment	HMM-based (lower-bound)	0	viruses_nov1663	None	PHANOTATE	0
k141_1262080_length_1484_cov_26.0000	lytic	low quality draft	1484	No	NA	4	1	0	Low-quality	Genome-fragment	HMM-based (lower-bound)	0	viruses_nov2975	None	Prodigal	0
k141_1263217_length_3675_cov_43.9966	lytic	low quality draft	3675	No	NA	8	1	0	Low-quality	Genome-fragment	HMM-based (lower-bound)	0	viruses_nov2569	None	PHANOTATE	0
k141_1263391_length_3712_cov_501.0000	lytic	low quality draft	3712	No	NA	5	1	0	Low-quality	Genome-fragment	HMM-based (lower-bound)	0	viruses_nov3027	None	Prodigal	0
k141_1263435_length_15293_cov_58.0000	lytic	low quality draft	15293	No	NA	19	3	1	Low-quality	Genome-fragment	AAI-based (medium-confidence)	0	viruses_nov2445	None	PHANOTATE	0
k141_1263979_length_4583_cov_1367.0000	lytic	low quality draft	4583	No	NA	8	3	0	Low-quality	Genome-fragment	AAI-based (medium-confidence)	0	viruses_nov654	None	Prodigal	1
k141_1264809_length_4952_cov_10.0000	lytic	low quality draft	4952	No	NA	10	3	0	Low-quality	Genome-fragment	HMM-based (lower-bound)	0	viruses_nov375	None	PHANOTATE	2
k141_1265396_length_1375_cov_188.0000	lytic	low quality draft	1375	No	NA	4	3	0	Low-quality	Genome-fragment	AAI-based (high-confidence)	0	viruses_nov2808	None	PHANOTATE	0
k141_1265881_length_10336_cov_50.0000	lytic	low quality draft	10336	No	NA	19	0	0	Not-determined	Genome-fragment	NA	0	viruses_nov100	None	PHANOTATE	0
k141_1265928_length_9081_cov_849.5655	lytic	low quality draft	9081	No	NA	11	4	0	Low-quality	Genome-fragment	AAI-based (medium-confidence)	0	viruses_nov1391	None	PHANOTATE	0
k141_1266155_length_4261_cov_24.0000	lytic	low quality draft	4261	No	NA	6	2	0	Low-quality	Genome-fragment	HMM-based (lower-bound)	0	viruses_nov3023	None	PHANOTATE	0
k141_1267278_length_9092_cov_45.0000	lysogenic	low quality draft	9092	No	NA	15	3	0	Low-quality	Genome-fragment	HMM-based (lower-bound)	0	viruses_nov684	None	PHANOTATE	0
k141_1267905_length_11492_cov_242.0000	lytic	low quality draft	11492	No	NA	18	2	0	Low-quality	Genome-fragment	HMM-based (lower-bound)	0	viruses_nov2882	ITR	PHANOTATE	1
k141_126845_length_30904_cov_1124.6473	lytic	complete circular	30904	No	NA	37	11	0	Low-quality	Genome-fragment	HMM-based (lower-bound)	0	viruses_nov1162	DTR	PHANOTATE	4
k141_1268731_length_24758_cov_85.8066	lytic	low quality draft	24758	No	NA	26	21	0	Medium-quality	Genome-fragment	AAI-based (medium-confidence)	0	viruses_nov1320	None	PHANOTATE	14
k141_1268948_length_6375_cov_429.0000	lytic	low quality draft	6375	No	NA	10	3	0	Low-quality	Genome-fragment	HMM-based (lower-bound)	0	viruses_nov2367	None	PHANOTATE	0
k141_1269060_length_18575_cov_450.1523	lytic	low quality draft	18575	No	NA	27	5	0	Low-quality	Genome-fragment	AAI-based (medium-confidence)	0	viruses_nov1244	None	PHANOTATE	0
k141_1269129_length_4080_cov_84.0000	lytic	low quality draft	4080	No	NA	8	4	0	Low-quality	Genome-fragment	AAI-based (medium-confidence)	0	viruses_nov2671	None	PHANOTATE	2
k141_1269173_length_7494_cov_19.0000	lytic	low quality draft	7494	No	NA	12	2	0	Low-quality	Genome-fragment	HMM-based (lower-bound)	0	viruses_nov1183	None	PHANOTATE	1
k141_1269496_length_4786_cov_151.7621	lytic	low quality draft	4786	No	NA	4	1	0	Low-quality	Genome-fragment	HMM-based (lower-bound)	0	viruses_nov931	None	PHANOTATE	0
k141_1269806_length_4104_cov_1119.0000	lytic	low quality draft	4104	No	NA	8	3	0	Low-quality	Genome-fragment	HMM-based (lower-bound)	0	viruses_nov2416	None	PHANOTATE	1
k141_1270778_length_5159_cov_935.7104	lytic	low quality draft	5159	No	NA	13	3	0	Low-quality	Genome-fragment	HMM-based (lower-bound)	0	viruses_nov1438	None	PHANOTATE	1
k141_1270787_length_1991_cov_9.0000	lytic	low quality draft	1991	No	NA	6	0	0	Not-determined	Genome-fragment	NA	0	viruses_nov821	None	PHANOTATE	0
k141_127450_length_4269_cov_300.0000	lytic	low quality draft	4269	No	NA	10	3	0	Low-quality	Genome-fragment	AAI-based (high-confidence)	0	viruses_nov563	None	PHANOTATE	0
k141_1274644_length_3923_cov_1284.1436	lytic	low quality draft	3923	No	NA	7	2	0	Low-quality	Genome-fragment	HMM-based (lower-bound)	0	viruses_nov353	None	PHANOTATE	0
k141_1274967_length_3571_cov_1016.8525	lytic	low quality draft	3571	No	NA	5	1	0	Low-quality	Genome-fragment	HMM-based (lower-bound)	0	viruses_nov1076	None	PHANOTATE	0
k141_127497_length_11506_cov_63.1121	lytic	low quality draft	11506	No	NA	12	10	0	Low-quality	Genome-fragment	AAI-based (medium-confidence)	0	viruses_nov1753	None	PHANOTATE	8
k141_1275393_length_11543_cov_55.0000	lytic	low quality draft	11543	No	NA	21	4	0	Low-quality	Genome-fragment	HMM-based (lower-bound)	0	viruses_nov1533	None	PHANOTATE	1
k141_1276001_length_1137_cov_195.1566	lytic	low quality draft	1137	No	NA	4	1	0	Low-quality	Genome-fragment	HMM-based (lower-bound)	0	viruses_nov1300	None	PHANOTATE	0
k141_127603_length_2630_cov_25.0000	lytic	low quality draft	2630	No	NA	4	3	0	Low-quality	Genome-fragment	AAI-based (high-confidence)	0	viruses_nov85	None	PHANOTATE	1
k141_127631_length_11251_cov_94.9580	lytic	low quality draft	11251	No	NA	12	9	0	Low-quality	Genome-fragment	AAI-based (medium-confidence)	0	viruses_nov1783	None	PHANOTATE	8
k141_1276537_length_16855_cov_229.6658	lytic	low quality draft	16855	No	NA	24	2	0	Low-quality	Genome-fragment	HMM-based (lower-bound)	0	viruses_nov217	None	PHANOTATE	0
k141_1276539_length_23616_cov_118.5663	lytic	medium quality draft	23616	No	NA	33	20	0	Medium-quality	Genome-fragment	AAI-based (high-confidence)	0	viruses_nov505	None	PHANOTATE	7
k141_12772_length_1575_cov_12.0000	lytic	low quality draft	1575	No	NA	4	1	0	Low-quality	Genome-fragment	AAI-based (medium-confidence)	0	viruses_nov2728	None	PHANOTATE	0
k141_1277228_length_2726_cov_670.0000	lytic	low quality draft	2726	No	NA	5	1	0	Low-quality	Genome-fragment	HMM-based (lower-bound)	0	viruses_nov3029	None	PHANOTATE	1
k141_1277243_length_6764_cov_164.0000	lytic	low quality draft	6764	No	NA	10	1	0	Low-quality	Genome-fragment	HMM-based (lower-bound)	0	viruses_nov106	None	PHANOTATE	0
k141_127727_length_7886_cov_9.0000	lytic	low quality draft	7886	No	NA	10	1	0	Low-quality	Genome-fragment	HMM-based (lower-bound)	0	viruses_nov1634	None	PHANOTATE	1
k141_1277293_length_3176_cov_437.0000	lytic	low quality draft	3176	No	NA	8	8	0	Low-quality	Genome-fragment	AAI-based (high-confidence)	0	viruses_nov3004	None	PHANOTATE	0
k141_1278064_length_33938_cov_86.4072	lytic	low quality draft	33938	No	NA	64	7	0	Low-quality	Genome-fragment	HMM-based (lower-bound)	0	viruses_nov2743	None	PHANOTATE	0
k141_1278316_length_2792_cov_45.0000	lytic	low quality draft	2792	No	NA	4	3	0	Low-quality	Genome-fragment	HMM-based (lower-bound)	0	viruses_nov447	None	PHANOTATE	1
k141_127832_length_17682_cov_112.5556	lytic	medium quality draft	17682	No	NA	18	11	0	Low-quality	Genome-fragment	AAI-based (medium-confidence)	0	viruses_nov1519	None	PHANOTATE	1
k141_1278493_length_7765_cov_633.0000	lytic	low quality draft	7765	No	NA	16	1	0	Low-quality	Genome-fragment	AAI-based (medium-confidence)	0	viruses_nov260	None	PHANOTATE	1
k141_1280704_length_2396_cov_1556.4501	lytic	low quality draft	2396	No	NA	4	3	0	Low-quality	Genome-fragment	HMM-based (lower-bound)	0	viruses_nov2880	None	PHANOTATE	0
k141_1280760_length_2437_cov_397.0000	lytic	low quality draft	2437	No	NA	8	3	0	Low-quality	Genome-fragment	AAI-based (medium-confidence)	0	viruses_nov2323	None	PHANOTATE	0
k141_1280761_length_5022_cov_18.0000	lytic	low quality draft	5022	No	NA	5	4	0	Low-quality	Genome-fragment	AAI-based (high-confidence)	0	viruses_nov96	None	PHANOTATE	2
k141_1280768_length_1493_cov_246.0000	lytic	low quality draft	1493	No	NA	4	3	0	Low-quality	Genome-fragment	AAI-based (high-confidence)	0	viruses_nov2602	None	PHANOTATE	0
k141_128106_length_4799_cov_389.8190	lytic	low quality draft	4799	No	NA	9	3	0	Low-quality	Genome-fragment	AAI-based (high-confidence)	0	viruses_nov2659	None	PHANOTATE	0
k141_1282504_length_3080_cov_276.0000	lytic	low quality draft	3080	No	NA	4	3	0	Low-quality	Genome-fragment	HMM-based (lower-bound)	0	viruses_nov2944	None	PHANOTATE	1
k141_128459_length_2514_cov_1605.0000	lytic	low quality draft	2514	No	NA	5	3	0	Low-quality	Genome-fragment	AAI-based (high-confidence)	0	viruses_nov2988	None	PHANOTATE	2
k141_1284763_length_4968_cov_242.0000	lytic	low quality draft	4968	No	NA	8	1	0	Low-quality	Genome-fragment	AAI-based (medium-confidence)	0	viruses_nov2357	None	PHANOTATE	0
k141_1285223_length_7663_cov_40.0000	lytic	low quality draft	7663	No	NA	13	12	0	Low-quality	Genome-fragment	AAI-based (high-confidence)	0	viruses_nov469	None	PHANOTATE	8
k141_128704_length_3234_cov_51.0000	lytic	low quality draft	3234	No	NA	6	4	0	Low-quality	Genome-fragment	HMM-based (lower-bound)	0	viruses_nov2454	None	PHANOTATE	1
k141_1287151_length_4329_cov_663.0000	lytic	low quality draft	4329	No	NA	7	2	0	Low-quality	Genome-fragment	AAI-based (medium-confidence)	0	viruses_nov794	None	PHANOTATE	0
k141_1287386_length_2148_cov_175.0000	lytic	low quality draft	2148	No	NA	4	1	0	Low-quality	Genome-fragment	AAI-based (medium-confidence)	0	viruses_nov2564	None	PHANOTATE	0
k141_1287763_length_3702_cov_205.2974	lytic	low quality draft	3702	No	NA	7	1	0	Low-quality	Genome-fragment	HMM-based (lower-bound)	0	viruses_nov635	None	Prodigal	0
k141_1288048_length_11013_cov_486.0000	lytic	low quality draft	11013	No	NA	18	2	0	Low-quality	Genome-fragment	HMM-based (lower-bound)	0	viruses_nov2903	None	PHANOTATE	0
k141_12891_length_2761_cov_886.0000	lytic	low quality draft	2761	No	NA	5	4	0	Low-quality	Genome-fragment	HMM-based (lower-bound)	0	viruses_nov1828	None	PHANOTATE	2
k141_1289119_length_6759_cov_473.0000	lytic	low quality draft	6759	No	NA	8	6	0	Low-quality	Genome-fragment	AAI-based (medium-confidence)	0	viruses_nov1351	None	PHANOTATE	5
k141_1289236_length_4191_cov_34.0000	lytic	low quality draft	4191	No	NA	4	3	0	Low-quality	Genome-fragment	HMM-based (lower-bound)	0	viruses_nov321	None	PHANOTATE	0
k141_1289250_length_8630_cov_113.0000	lytic	low quality draft	8630	No	NA	16	3	0	Low-quality	Genome-fragment	AAI-based (medium-confidence)	0	viruses_nov3030	None	PHANOTATE	0
k141_1289593_length_4731_cov_25.0000	lytic	low quality draft	4731	No	NA	7	6	0	Low-quality	Genome-fragment	AAI-based (high-confidence)	0	viruses_nov2872	None	PHANOTATE	2
k141_12916_length_54235_cov_42126.9825	lysogenic	low quality draft	54235	No	NA	44	7	0	Low-quality	Genome-fragment	AAI-based (high-confidence)	0	viruses_nov1593	None	Prodigal	1
k141_1291682_length_6084_cov_20.0000	lytic	low quality draft	6084	No	NA	5	2	0	Low-quality	Genome-fragment	AAI-based (high-confidence)	0	viruses_nov479	None	PHANOTATE	2
k141_1291740_length_4600_cov_2935.0000	lytic	low quality draft	4600	No	NA	10	3	0	Low-quality	Genome-fragment	AAI-based (medium-confidence)	0	viruses_nov644	None	PHANOTATE	0
k141_1292400_length_3880_cov_255.0000	lytic	low quality draft	3880	No	NA	5	3	0	Low-quality	Genome-fragment	HMM-based (lower-bound)	0	viruses_nov2771	None	PHANOTATE	2
k141_1293196_length_3271_cov_1309.0000	lytic	low quality draft	3271	No	NA	5	0	0	Not-determined	Genome-fragment	NA	0	viruses_nov2805	None	PHANOTATE	0
k141_1294150_length_3533_cov_34.0000	lytic	low quality draft	3533	No	NA	7	5	0	Low-quality	Genome-fragment	AAI-based (high-confidence)	0	viruses_nov2608	None	PHANOTATE	0
k141_1294638_length_69902_cov_928.7313	lytic	high quality draft	69902	No	NA	82	46	1	High-quality	High-quality	AAI-based (high-confidence)	0	viruses_nov333	None	PHANOTATE	5
k141_129524_length_32418_cov_3075.8418	lytic	low quality draft	32418	No	NA	40	15	0	Medium-quality	Genome-fragment	AAI-based (medium-confidence)	0	viruses_nov2699	None	PHANOTATE	8
k141_1295307_length_4547_cov_37.0000	lytic	low quality draft	4547	No	NA	8	5	0	Low-quality	Genome-fragment	AAI-based (medium-confidence)	0	viruses_nov709	None	PHANOTATE	1
k141_1295778_length_5563_cov_157.4354	lytic	low quality draft	5563	No	NA	11	2	0	Low-quality	Genome-fragment	HMM-based (lower-bound)	0	viruses_nov117	ITR	PHANOTATE	0
k141_1296024_length_6424_cov_307.0000	lytic	low quality draft	6424	No	NA	5	1	0	Low-quality	Genome-fragment	HMM-based (lower-bound)	0	viruses_nov1157	None	Prodigal	1
k141_1296416_length_3722_cov_101.0000	lytic	low quality draft	3722	No	NA	5	1	0	Low-quality	Genome-fragment	HMM-based (lower-bound)	0	viruses_nov1200	None	PHANOTATE	0
k141_1296445_length_15954_cov_32.0000	lytic	low quality draft	15954	No	NA	14	1	0	Low-quality	Genome-fragment	HMM-based (lower-bound)	0	viruses_nov1384	None	Prodigal	0
k141_1297437_length_2940_cov_171.0000	lytic	low quality draft	2940	No	NA	6	1	0	Low-quality	Genome-fragment	AAI-based (medium-confidence)	0	viruses_nov2768	None	PHANOTATE	0
k141_1297858_length_1139_cov_775.8447	lytic	low quality draft	1139	No	NA	4	2	0	Low-quality	Genome-fragment	AAI-based (medium-confidence)	0	viruses_nov2794	None	PHANOTATE	0
k141_1298684_length_5251_cov_127.0000	lytic	low quality draft	5251	No	NA	6	3	0	Low-quality	Genome-fragment	AAI-based (medium-confidence)	0	viruses_nov111	None	PHANOTATE	0
k141_1301395_length_5054_cov_299.2422	lytic	low quality draft	5054	No	NA	6	2	0	Low-quality	Genome-fragment	HMM-based (lower-bound)	0	viruses_nov2636	None	PHANOTATE	2
k141_1301948_length_3365_cov_20.0000	lytic	low quality draft	3365	No	NA	6	5	0	Low-quality	Genome-fragment	HMM-based (lower-bound)	0	viruses_nov2331	None	PHANOTATE	1
k141_1302426_length_24725_cov_165.1108	lytic	medium quality draft	24725	No	NA	25	20	0	Low-quality	Genome-fragment	AAI-based (medium-confidence)	0	viruses_nov492	None	PHANOTATE	7
k141_1302432_length_3311_cov_489.0000	lytic	low quality draft	3311	No	NA	6	1	0	Low-quality	Genome-fragment	AAI-based (medium-confidence)	0	viruses_nov2412	None	PHANOTATE	0
k141_1302828_length_1749_cov_6.0000	lytic	low quality draft	1749	No	NA	4	1	0	Low-quality	Genome-fragment	HMM-based (lower-bound)	0	viruses_nov3034	None	PHANOTATE	1
k141_1302898_length_8337_cov_764.9616	lytic	low quality draft	8337	No	NA	14	3	0	Low-quality	Genome-fragment	HMM-based (lower-bound)	0	viruses_nov245	None	PHANOTATE	2
k141_1303283_length_4122_cov_16.0000	lytic	low quality draft	4122	No	NA	6	4	0	Low-quality	Genome-fragment	AAI-based (medium-confidence)	0	viruses_nov2309	None	PHANOTATE	1
k141_1304566_length_6092_cov_75.0032	lytic	low quality draft	6092	No	NA	7	2	0	Low-quality	Genome-fragment	AAI-based (medium-confidence)	0	viruses_nov120	None	PHANOTATE	1
k141_1304604_length_11464_cov_347.8120	lytic	low quality draft	11464	No	NA	18	6	0	Low-quality	Genome-fragment	HMM-based (lower-bound)	0	viruses_nov1543	None	PHANOTATE	6
k141_1304656_length_4641_cov_643.9076	lytic	low quality draft	4641	No	NA	6	1	0	Low-quality	Genome-fragment	AAI-based (medium-confidence)	0	viruses_nov22	None	PHANOTATE	0
k141_1304945_length_5452_cov_556.0000	lytic	low quality draft	5452	No	NA	5	3	0	Low-quality	Genome-fragment	AAI-based (medium-confidence)	0	viruses_nov2475	None	PHANOTATE	0
k141_1305542_length_1666_cov_607.0000	lytic	low quality draft	1666	No	NA	4	2	0	Low-quality	Genome-fragment	AAI-based (medium-confidence)	0	viruses_nov2993	None	PHANOTATE	0
k141_1305820_length_9386_cov_26.0000	lytic	low quality draft	9386	No	NA	7	1	0	Low-quality	Genome-fragment	AAI-based (medium-confidence)	0	viruses_nov2332	None	PHANOTATE	1
k141_1306219_length_4065_cov_249.0196	lytic	low quality draft	4065	No	NA	7	2	0	Low-quality	Genome-fragment	AAI-based (medium-confidence)	0	viruses_nov716	None	PHANOTATE	2
k141_1306954_length_1596_cov_189.0000	lytic	low quality draft	1596	No	NA	4	2	0	Low-quality	Genome-fragment	AAI-based (medium-confidence)	0	viruses_nov2698	None	PHANOTATE	0
k141_1307007_length_4076_cov_119.0000	lytic	low quality draft	4076	No	NA	9	2	0	Low-quality	Genome-fragment	AAI-based (high-confidence)	0	viruses_nov2662	None	PHANOTATE	0
k141_130735_length_5728_cov_589.0000	lytic	low quality draft	5728	No	NA	7	6	0	Low-quality	Genome-fragment	AAI-based (medium-confidence)	0	viruses_nov2861	None	PHANOTATE	4
k141_1307731_length_5817_cov_249.9863	lytic	low quality draft	5817	No	NA	8	3	0	Low-quality	Genome-fragment	HMM-based (lower-bound)	0	viruses_nov2616	None	PHANOTATE	1
k141_130801_length_15200_cov_2593.8109	lytic	low quality draft	15200	No	NA	13	3	0	Low-quality	Genome-fragment	AAI-based (medium-confidence)	0	viruses_nov2151	None	PHANOTATE	1
k141_1308200_length_2608_cov_50.0000	lytic	low quality draft	2608	No	NA	7	0	0	Not-determined	Genome-fragment	NA	0	viruses_nov2948	None	PHANOTATE	0
k141_1308432_length_11559_cov_106.0000	lytic	low quality draft	11559	No	NA	27	3	0	Low-quality	Genome-fragment	HMM-based (lower-bound)	0	viruses_nov2491	None	PHANOTATE	0
k141_1308586_length_2526_cov_787.0000	lytic	low quality draft	2526	No	NA	5	1	0	Low-quality	Genome-fragment	AAI-based (high-confidence)	0	viruses_nov2831	None	PHANOTATE	1
k141_1308620_length_5938_cov_890.8397	lytic	low quality draft	5938	No	NA	13	0	0	Not-determined	Genome-fragment	NA	0	viruses_nov2807	None	PHANOTATE	0
k141_1309655_length_1974_cov_129.0000	lytic	low quality draft	1974	No	NA	4	3	0	Low-quality	Genome-fragment	AAI-based (high-confidence)	0	viruses_nov2427	None	PHANOTATE	1
k141_1312461_length_14294_cov_359.0000	lytic	low quality draft	14294	No	NA	22	5	0	Low-quality	Genome-fragment	AAI-based (medium-confidence)	0	viruses_nov790	None	PHANOTATE	0
k141_1312926_length_13944_cov_568.9292	lytic	low quality draft	13944	No	NA	17	4	0	Low-quality	Genome-fragment	HMM-based (lower-bound)	0	viruses_nov2237	None	PHANOTATE	2
k141_1315158_length_1376_cov_79.0000	lytic	low quality draft	1376	No	NA	4	2	0	Low-quality	Genome-fragment	AAI-based (medium-confidence)	0	viruses_nov21	None	PHANOTATE	0
k141_1315621_length_3369_cov_637.4449	lytic	low quality draft	3369	No	NA	4	3	0	Low-quality	Genome-fragment	AAI-based (medium-confidence)	0	viruses_nov287	None	PHANOTATE	0
k141_1316269_length_1036_cov_14.0000	lytic	low quality draft	1036	No	NA	5	2	0	Low-quality	Genome-fragment	AAI-based (high-confidence)	0	viruses_nov2930	None	PHANOTATE	0
k141_131686_length_1590_cov_17.0000	lytic	low quality draft	1590	No	NA	4	1	0	Low-quality	Genome-fragment	HMM-based (lower-bound)	0	viruses_nov1928	None	Prodigal	0
k141_1316860_length_18352_cov_144.0000	lytic	low quality draft	18352	No	NA	23	13	0	Low-quality	Genome-fragment	AAI-based (high-confidence)	0	viruses_nov3001	None	PHANOTATE	9
k141_1316990_length_11600_cov_126.8913	lytic	low quality draft	11600	No	NA	22	6	0	Low-quality	Genome-fragment	AAI-based (medium-confidence)	0	viruses_nov1279	None	PHANOTATE	0
k141_1317012_length_4125_cov_1881.0284	lytic	low quality draft	4125	No	NA	13	2	0	Low-quality	Genome-fragment	AAI-based (medium-confidence)	0	viruses_nov2849	None	PHANOTATE	0
k141_1317026_length_8802_cov_926.3414	lytic	low quality draft	8802	No	NA	9	3	0	Low-quality	Genome-fragment	AAI-based (medium-confidence)	0	viruses_nov1551	None	PHANOTATE	1
k141_131779_length_5413_cov_43.0000	lytic	low quality draft	5413	No	NA	4	3	0	Low-quality	Genome-fragment	HMM-based (lower-bound)	0	viruses_nov1524	None	PHANOTATE	1
k141_1317866_length_5028_cov_1724.4758	lytic	low quality draft	5028	No	NA	6	5	0	Low-quality	Genome-fragment	HMM-based (lower-bound)	0	viruses_nov1007	None	PHANOTATE	4
k141_1318134_length_1642_cov_481.0000	lytic	low quality draft	1642	No	NA	5	1	0	Low-quality	Genome-fragment	AAI-based (medium-confidence)	0	viruses_nov1458	None	PHANOTATE	0
k141_1318483_length_6058_cov_142.0000	lytic	low quality draft	6058	No	NA	11	7	1	Low-quality	Genome-fragment	HMM-based (lower-bound)	0	viruses_nov969	None	PHANOTATE	6
k141_1318842_length_6627_cov_187.0000	lytic	low quality draft	6627	No	NA	9	1	0	Low-quality	Genome-fragment	HMM-based (lower-bound)	0	viruses_nov1298	None	PHANOTATE	0
k141_131923_length_1752_cov_214.0000	lytic	low quality draft	1752	No	NA	6	3	0	Low-quality	Genome-fragment	AAI-based (high-confidence)	0	viruses_nov2962	None	Prodigal	0
k141_1319835_length_2335_cov_225.0000	lytic	low quality draft	2335	No	NA	5	1	0	Low-quality	Genome-fragment	HMM-based (lower-bound)	0	viruses_nov1476	None	PHANOTATE	0
k141_1319938_length_3109_cov_909.0000	lytic	low quality draft	3109	No	NA	7	0	0	Low-quality	Genome-fragment	AAI-based (medium-confidence)	0	viruses_nov2755	None	PHANOTATE	0
k141_1320131_length_1109_cov_13.0000	lytic	low quality draft	1109	No	NA	4	0	0	Not-determined	Genome-fragment	NA	0	viruses_nov65	None	PHANOTATE	0
k141_1321198_length_1838_cov_626.0000	lytic	low quality draft	1838	No	NA	6	5	0	Low-quality	Genome-fragment	AAI-based (high-confidence)	0	viruses_nov2996	None	PHANOTATE	0
k141_1321936_length_1671_cov_37.0000	lytic	low quality draft	1671	No	NA	5	3	0	Low-quality	Genome-fragment	AAI-based (high-confidence)	0	viruses_nov833	None	PHANOTATE	0
k141_1322293_length_12089_cov_64.9973	lytic	low quality draft	12089	No	NA	16	3	1	Low-quality	Genome-fragment	AAI-based (medium-confidence)	0	viruses_nov1196	None	PHANOTATE	0
k141_132276_length_1494_cov_795.0000	lytic	low quality draft	1494	No	NA	4	2	0	Low-quality	Genome-fragment	AAI-based (medium-confidence)	0	viruses_nov2625	None	Prodigal	0
k141_1323219_length_5551_cov_97.0000	lytic	low quality draft	5551	No	NA	4	3	0	Low-quality	Genome-fragment	AAI-based (medium-confidence)	0	viruses_nov1058	None	PHANOTATE	0
k141_132374_length_3223_cov_8.0000	lytic	low quality draft	3223	No	NA	4	1	0	Low-quality	Genome-fragment	HMM-based (lower-bound)	0	viruses_nov1979	None	PHANOTATE	0
k141_1324512_length_8232_cov_41.2267	lytic	low quality draft	8232	No	NA	18	1	0	Low-quality	Genome-fragment	AAI-based (medium-confidence)	0	viruses_nov2361	None	PHANOTATE	0
k141_1324694_length_1776_cov_469.0000	lytic	low quality draft	1776	No	NA	4	2	0	Low-quality	Genome-fragment	AAI-based (medium-confidence)	0	viruses_nov320	None	PHANOTATE	2
k141_1324999_length_3237_cov_28.0000	lytic	low quality draft	3237	No	NA	5	3	0	Low-quality	Genome-fragment	AAI-based (high-confidence)	0	viruses_nov387	None	PHANOTATE	1
k141_1325267_length_3173_cov_113.0000	lytic	low quality draft	1535	No	NA	4	0	1	Not-determined	Genome-fragment	NA	0	viruses_nov2580	None	Prodigal	0
k141_132712_length_4045_cov_321.0000	lytic	low quality draft	4045	No	NA	6	1	0	Low-quality	Genome-fragment	HMM-based (lower-bound)	0	viruses_nov2667	None	PHANOTATE	0
k141_1327411_length_2256_cov_45.0000	lytic	low quality draft	2256	No	NA	5	2	0	Low-quality	Genome-fragment	AAI-based (medium-confidence)	0	viruses_nov141	None	PHANOTATE	0
k141_1327964_length_3234_cov_157.0000	lytic	low quality draft	3234	No	NA	8	1	0	Low-quality	Genome-fragment	AAI-based (medium-confidence)	0	viruses_nov2584	None	PHANOTATE	0
k141_1328447_length_3142_cov_2239.0000	lytic	low quality draft	3142	No	NA	8	1	0	Low-quality	Genome-fragment	HMM-based (lower-bound)	0	viruses_nov391	None	PHANOTATE	0
k141_1328846_length_5663_cov_33.0000	lytic	low quality draft	5663	No	NA	6	2	0	Low-quality	Genome-fragment	HMM-based (lower-bound)	0	viruses_nov234	None	PHANOTATE	0
k141_1329458_length_3074_cov_5.0000	lytic	low quality draft	3074	No	NA	4	2	0	Low-quality	Genome-fragment	HMM-based (lower-bound)	0	viruses_nov2496	None	PHANOTATE	1
k141_1329731_length_2284_cov_334.0000	lytic	low quality draft	2284	No	NA	8	2	0	Low-quality	Genome-fragment	HMM-based (lower-bound)	0	viruses_nov2979	None	PHANOTATE	0
k141_1330084_length_6056_cov_551.5877	lytic	low quality draft	6056	No	NA	8	1	0	Low-quality	Genome-fragment	HMM-based (lower-bound)	0	viruses_nov2466	None	PHANOTATE	0
k141_1330676_length_1929_cov_284.9172	lytic	low quality draft	1929	No	NA	4	1	0	Low-quality	Genome-fragment	HMM-based (lower-bound)	0	viruses_nov9	None	PHANOTATE	0
k141_1330972_length_5146_cov_123.0000	lytic	low quality draft	5146	No	NA	5	0	1	Not-determined	Genome-fragment	NA	0	viruses_nov1539	None	PHANOTATE	0
k141_1331528_length_6523_cov_98.9735	lytic	low quality draft	6523	No	NA	7	2	0	Low-quality	Genome-fragment	HMM-based (lower-bound)	0	viruses_nov1481	None	PHANOTATE	0
k141_1333351_length_2982_cov_376.0000	lytic	low quality draft	2982	No	NA	6	2	0	Low-quality	Genome-fragment	HMM-based (lower-bound)	0	viruses_nov361	None	PHANOTATE	0
k141_1333454_length_3217_cov_291.0000	lytic	low quality draft	3217	No	NA	5	3	0	Low-quality	Genome-fragment	AAI-based (medium-confidence)	0	viruses_nov1578	None	PHANOTATE	0
k141_1334112_length_4322_cov_369.4245	lytic	low quality draft	4322	No	NA	5	3	0	Low-quality	Genome-fragment	HMM-based (lower-bound)	0	viruses_nov17	None	PHANOTATE	2
k141_1334645_length_3654_cov_565.4614	lytic	low quality draft	3654	No	NA	7	3	0	Low-quality	Genome-fragment	AAI-based (high-confidence)	0	viruses_nov72	None	PHANOTATE	2
k141_1335401_length_2089_cov_42.0000	lytic	low quality draft	2089	No	NA	4	1	0	Low-quality	Genome-fragment	HMM-based (lower-bound)	0	viruses_nov279	None	PHANOTATE	0
k141_1335431_length_1573_cov_23.0000	lytic	low quality draft	1573	No	NA	5	1	0	Low-quality	Genome-fragment	AAI-based (high-confidence)	0	viruses_nov2285	None	PHANOTATE	1
k141_133587_length_2378_cov_8.0000	lytic	low quality draft	2378	No	NA	5	5	0	Low-quality	Genome-fragment	HMM-based (lower-bound)	0	viruses_nov1777	None	PHANOTATE	4
k141_1336069_length_1402_cov_538.0000	lytic	low quality draft	1402	No	NA	5	0	0	Low-quality	Genome-fragment	AAI-based (medium-confidence)	0	viruses_nov1235	None	PHANOTATE	0
k141_133622_length_1349_cov_8.0000	lytic	low quality draft	1349	No	NA	5	1	0	Low-quality	Genome-fragment	AAI-based (medium-confidence)	0	viruses_nov2242	None	PHANOTATE	1
k141_133652_length_3951_cov_462.0000	lytic	low quality draft	3951	No	NA	10	3	0	Low-quality	Genome-fragment	AAI-based (high-confidence)	0	viruses_nov200	None	PHANOTATE	1
k141_1337338_length_4156_cov_16.0000	lytic	low quality draft	4156	No	NA	5	4	0	Low-quality	Genome-fragment	AAI-based (high-confidence)	0	viruses_nov543	None	PHANOTATE	0
k141_1338255_length_6080_cov_88.0000	lytic	low quality draft	6080	No	NA	13	3	0	Low-quality	Genome-fragment	HMM-based (lower-bound)	0	viruses_nov2243	None	PHANOTATE	0
k141_1338518_length_41709_cov_440.9889	lysogenic	low quality draft	41709	No	NA	64	34	0	High-quality	High-quality	AAI-based (high-confidence)	0	viruses_nov218	None	PHANOTATE	16
k141_1339501_length_4911_cov_1709.6629	lytic	low quality draft	4911	No	NA	4	3	0	Low-quality	Genome-fragment	AAI-based (high-confidence)	0	viruses_nov763	None	PHANOTATE	0
k141_1341541_length_6757_cov_242.0110	lytic	low quality draft	6757	No	NA	11	3	0	Low-quality	Genome-fragment	AAI-based (medium-confidence)	0	viruses_nov354	None	PHANOTATE	0
k141_1341768_length_10027_cov_258.1289	lytic	medium quality draft	10027	No	NA	15	3	0	Low-quality	Genome-fragment	HMM-based (lower-bound)	0	viruses_nov475	None	PHANOTATE	1
k141_1341965_length_4458_cov_109.0000	lytic	low quality draft	4458	No	NA	5	2	0	Low-quality	Genome-fragment	AAI-based (high-confidence)	0	viruses_nov1494	None	PHANOTATE	1
k141_1342322_length_1272_cov_1480.0000	lytic	low quality draft	1272	No	NA	5	1	0	Low-quality	Genome-fragment	HMM-based (lower-bound)	0	viruses_nov392	None	PHANOTATE	0
k141_1342345_length_10865_cov_165.0000	lytic	low quality draft	10865	No	NA	18	3	1	Low-quality	Genome-fragment	HMM-based (lower-bound)	0	viruses_nov325	None	PHANOTATE	1
k141_1343039_length_3210_cov_38.0000	lytic	low quality draft	3210	No	NA	6	1	0	Low-quality	Genome-fragment	HMM-based (lower-bound)	0	viruses_nov2750	None	PHANOTATE	0
k141_1343646_length_3980_cov_873.0000	lytic	low quality draft	3980	No	NA	5	3	0	Low-quality	Genome-fragment	AAI-based (medium-confidence)	0	viruses_nov2586	None	PHANOTATE	3
k141_1343694_length_6354_cov_268.0000	lytic	low quality draft	6354	No	NA	10	7	0	Low-quality	Genome-fragment	AAI-based (medium-confidence)	0	viruses_nov470	None	PHANOTATE	5
k141_1345141_length_24361_cov_21.2596	lytic	low quality draft	24361	No	NA	34	2	1	Low-quality	Genome-fragment	HMM-based (lower-bound)	0	viruses_nov1579	None	PHANOTATE	0
k141_1346628_length_2771_cov_1355.5243	lytic	low quality draft	2771	No	NA	4	1	0	Low-quality	Genome-fragment	HMM-based (lower-bound)	0	viruses_nov372	None	PHANOTATE	0
k141_134670_length_8818_cov_815.6267	lytic	low quality draft	8818	No	NA	13	3	1	Low-quality	Genome-fragment	HMM-based (lower-bound)	0	viruses_nov2943	None	PHANOTATE	0
k141_1346822_length_2432_cov_674.0000	lytic	low quality draft	2432	No	NA	5	1	0	Low-quality	Genome-fragment	HMM-based (lower-bound)	0	viruses_nov476	None	PHANOTATE	0
k141_1346826_length_5824_cov_13.0000	lytic	low quality draft	5824	No	NA	8	7	0	Low-quality	Genome-fragment	AAI-based (medium-confidence)	0	viruses_nov2238	None	PHANOTATE	6
k141_1348079_length_7101_cov_974.3934	lytic	low quality draft	7101	No	NA	7	4	0	Low-quality	Genome-fragment	HMM-based (lower-bound)	0	viruses_nov757	None	PHANOTATE	2
k141_1349415_length_3426_cov_16.0000	lytic	low quality draft	3426	No	NA	6	4	0	Low-quality	Genome-fragment	AAI-based (medium-confidence)	0	viruses_nov301	None	PHANOTATE	5
k141_1349836_length_3586_cov_73.0000	lytic	low quality draft	3586	No	NA	5	4	0	Low-quality	Genome-fragment	AAI-based (high-confidence)	0	viruses_nov1155	None	PHANOTATE	4
k141_134992_length_4812_cov_15.0777	lytic	low quality draft	4812	No	NA	6	5	0	Low-quality	Genome-fragment	AAI-based (medium-confidence)	0	viruses_nov1815	None	PHANOTATE	5
k141_1349947_length_7215_cov_32.0000	lytic	low quality draft	7215	No	NA	8	7	0	Low-quality	Genome-fragment	AAI-based (medium-confidence)	0	viruses_nov2845	None	PHANOTATE	2
k141_1350997_length_3392_cov_1023.9259	lytic	low quality draft	3392	No	NA	11	3	0	Low-quality	Genome-fragment	HMM-based (lower-bound)	0	viruses_nov1216	None	PHANOTATE	0
k141_1351001_length_3776_cov_892.2468	lytic	low quality draft	3776	No	NA	6	4	0	Low-quality	Genome-fragment	AAI-based (high-confidence)	0	viruses_nov1268	None	PHANOTATE	4
k141_1351705_length_1426_cov_8.0000	lytic	low quality draft	1426	No	NA	4	0	0	Low-quality	Genome-fragment	AAI-based (medium-confidence)	0	viruses_nov2358	None	PHANOTATE	0
k141_1351976_length_5802_cov_1430.6663	lytic	low quality draft	5802	No	NA	8	6	0	Low-quality	Genome-fragment	AAI-based (high-confidence)	0	viruses_nov1044	None	PHANOTATE	4
k141_1353999_length_3549_cov_1763.0000	lytic	low quality draft	3549	No	NA	6	2	0	Low-quality	Genome-fragment	HMM-based (lower-bound)	0	viruses_nov1122	None	PHANOTATE	0
k141_1355488_length_3919_cov_244.0000	lytic	low quality draft	3919	No	NA	9	1	0	Low-quality	Genome-fragment	HMM-based (lower-bound)	0	viruses_nov1199	None	PHANOTATE	0
k141_1355993_length_3435_cov_31.0000	lytic	low quality draft	3435	No	NA	7	2	0	Low-quality	Genome-fragment	HMM-based (lower-bound)	0	viruses_nov2375	None	PHANOTATE	0
k141_1356027_length_14444_cov_118.0000	lytic	medium quality draft	14444	No	NA	27	3	0	Low-quality	Genome-fragment	HMM-based (lower-bound)	0	viruses_nov1347	None	PHANOTATE	2
k141_1357145_length_3723_cov_374.7663	lytic	low quality draft	3723	No	NA	4	3	0	Low-quality	Genome-fragment	AAI-based (medium-confidence)	0	viruses_nov2431	None	PHANOTATE	2
k141_1357194_length_3857_cov_298.0000	lytic	low quality draft	3857	No	NA	4	3	0	Low-quality	Genome-fragment	HMM-based (lower-bound)	0	viruses_nov1373	None	PHANOTATE	3
k141_1357333_length_7818_cov_406.0000	lytic	low quality draft	7818	No	NA	6	4	0	Low-quality	Genome-fragment	HMM-based (lower-bound)	0	viruses_nov812	None	PHANOTATE	0
k141_1358419_length_1919_cov_22.0000	lytic	low quality draft	1919	No	NA	5	2	0	Low-quality	Genome-fragment	AAI-based (medium-confidence)	0	viruses_nov1164	None	Prodigal	1
k141_1358456_length_3216_cov_117.0000	lytic	low quality draft	3216	No	NA	5	2	0	Low-quality	Genome-fragment	HMM-based (lower-bound)	0	viruses_nov1257	None	PHANOTATE	1
k141_135871_length_3196_cov_670.2848	lytic	low quality draft	3196	No	NA	10	1	0	Low-quality	Genome-fragment	HMM-based (lower-bound)	0	viruses_nov304	None	PHANOTATE	0
k141_1359990_length_19528_cov_108.5804	lytic	low quality draft	19528	No	NA	19	4	0	Low-quality	Genome-fragment	AAI-based (medium-confidence)	0	viruses_nov878	None	PHANOTATE	5
[truncated: 2,414 more rows]

## Sheet: Table_S3
Table S3: Overview of the protein similarity assessment between viral sequences identified in the current study and the previously described viruses (Refseq database).
[truncated: 7,575 more rows]

[truncated: 3 more sheets: Table_S4, Table_S5, Table_S6]
